# Supplementary material
Source: publisher figshare collection journal article supplement (https://acs.figshare.com/ndownloader/files/3740305)
Supplement: Supplementary file 1 [file 3740305]

 
#data_FW155_0m 
data_27
  
_audit_creation_method            'SHELXL-2014/7' 
_shelx_SHELXL_version_number      '2014/7' 
_chemical_name_systematic         ? 
_chemical_name_common             FW155 
_chemical_melting_point           ? 
_chemical_formula_moiety          'C15 H14 N2 O7' 
_chemical_formula_sum 
 'C15 H14 N2 O7' 
_chemical_formula_weight          334.28 
  
loop_ 
 _atom_type_symbol 
 _atom_type_description 
 _atom_type_scat_dispersion_real 
 _atom_type_scat_dispersion_imag 
 _atom_type_scat_source 
 'C'  'C'   0.0033   0.0016 
 'International Tables Vol C Tables 4.2.6.8 and 6.1.1.4' 
 'H'  'H'   0.0000   0.0000 
 'International Tables Vol C Tables 4.2.6.8 and 6.1.1.4' 
 'N'  'N'   0.0061   0.0033 
 'International Tables Vol C Tables 4.2.6.8 and 6.1.1.4' 
 'O'  'O'   0.0106   0.0060 
 'International Tables Vol C Tables 4.2.6.8 and 6.1.1.4' 
  
_space_group_crystal_system       triclinic 
_space_group_IT_number            2 
_space_group_name_H-M_alt         'P -1' 
_space_group_name_Hall            '-P 1' 
  
_shelx_space_group_comment 
; 
The symmetry employed for this shelxl refinement is uniquely defined 
by the following loop, which should always be used as a source of 
symmetry information in preference to the above space-group names. 
They are only intended as comments. 
; 
  
loop_ 
 _space_group_symop_operation_xyz 
 'x, y, z' 
 '-x, -y, -z' 
  
_cell_length_a                    6.8857(11) 
_cell_length_b                    7.8782(12) 
_cell_length_c                    14.230(2) 
_cell_angle_alpha                 73.669(5) 
_cell_angle_beta                  85.904(5) 
_cell_angle_gamma                 80.621(5) 
_cell_volume                      730.6(2) 
_cell_formula_units_Z             2 
_cell_measurement_temperature     100(2) 
_cell_measurement_reflns_used     3260 
_cell_measurement_theta_min       2.7245 
_cell_measurement_theta_max       25.2421 
  
_exptl_crystal_description        needle 
_exptl_crystal_colour             colourless 
_exptl_crystal_density_meas       ? 
_exptl_crystal_density_method     'not measured' 
_exptl_crystal_density_diffrn     1.519 
_exptl_crystal_F_000              348 
_exptl_transmission_factor_min    ? 
_exptl_transmission_factor_max    ? 
_exptl_crystal_size_max           0.33 
_exptl_crystal_size_mid           0.08 
_exptl_crystal_size_min           0.05 
_exptl_absorpt_coefficient_mu     0.123 
_shelx_estimated_absorpt_T_min    0.961 
_shelx_estimated_absorpt_T_max    0.994 
_exptl_absorpt_correction_type    multi-scan 
_exptl_absorpt_correction_T_min   0.90 
_exptl_absorpt_correction_T_max   0.99 
_exptl_absorpt_process_details    'SADABS V2014/4 (Bruker AXS Inc.)' 
_exptl_absorpt_special_details    ? 
_diffrn_ambient_temperature       100(2) 
_diffrn_radiation_wavelength      0.71073 
_diffrn_radiation_type            MoK\a 
_diffrn_source                    'microfocus sealed X-ray tube' 
_diffrn_measurement_device_type   'Bruker D8 QUEST area detector' 
_diffrn_measurement_method        '\w and \f scans' 
_diffrn_detector_area_resol_mean  7.9 
_diffrn_reflns_number             11743 
_diffrn_reflns_av_unetI/netI      0.0373 
_diffrn_reflns_av_R_equivalents   0.0505 
_diffrn_reflns_limit_h_min        -8 
_diffrn_reflns_limit_h_max        8 
_diffrn_reflns_limit_k_min        -9 
_diffrn_reflns_limit_k_max        9 
_diffrn_reflns_limit_l_min        -17 
_diffrn_reflns_limit_l_max        16 
_diffrn_reflns_theta_min          2.725 
_diffrn_reflns_theta_max          25.335 
_diffrn_reflns_theta_full         25.242 
_diffrn_measured_fraction_theta_max   0.985 
_diffrn_measured_fraction_theta_full  0.988 
_diffrn_reflns_Laue_measured_fraction_max    0.985 
_diffrn_reflns_Laue_measured_fraction_full   0.988 
_diffrn_reflns_point_group_measured_fraction_max   0.985 
_diffrn_reflns_point_group_measured_fraction_full  0.988 
_reflns_number_total              2633 
_reflns_number_gt                 1964 
_reflns_threshold_expression      'I > 2\s(I)' 
_reflns_Friedel_coverage          0.000 
_reflns_Friedel_fraction_max      . 
_reflns_Friedel_fraction_full     . 
  
_reflns_special_details 
; 
 Reflections were merged by SHELXL according to the crystal 
 class for the calculation of statistics and refinement. 
  
 _reflns_Friedel_fraction is defined as the number of unique 
 Friedel pairs measured divided by the number that would be 
 possible theoretically, ignoring centric projections and 
 systematic absences. 
; 
  
_computing_data_collection        'BRUKER APEX2 2014.9-0' 
_computing_cell_refinement        'BRUKER SAINT' 
_computing_data_reduction         'SAINT V8.34A (Bruker AXS Inc., 2013)' 
_computing_structure_solution     'SHELXT V2014/1 (Sheldrick, 2014)' 
_computing_structure_refinement 'SHELXL-2014/7 (Sheldrick, 2014)' 
_computing_molecular_graphics     'DIAMOND (Crystal Impact)' 
_computing_publication_material   ? 
_refine_special_details 
; 
; 
_refine_ls_structure_factor_coef  Fsqd 
_refine_ls_matrix_type            full 
_refine_ls_weighting_scheme       calc 
_refine_ls_weighting_details 
'w=1/[\s^2^(Fo^2^)+(0.0455P)^2^+0.2330P] where P=(Fo^2^+2Fc^2^)/3' 
_atom_sites_solution_primary      direct 
_atom_sites_solution_secondary    difmap 
_atom_sites_solution_hydrogens    mixed 
_refine_ls_hydrogen_treatment     mixed 
_refine_ls_extinction_method      none 
_refine_ls_extinction_coef        . 
_refine_ls_number_reflns          2633 
_refine_ls_number_parameters      224 
_refine_ls_number_restraints      0 
_refine_ls_R_factor_all           0.0637 
_refine_ls_R_factor_gt            0.0397 
_refine_ls_wR_factor_ref          0.0987 
_refine_ls_wR_factor_gt           0.0895 
_refine_ls_goodness_of_fit_ref    1.052 
_refine_ls_restrained_S_all       1.052 
_refine_ls_shift/su_max           0.000 
_refine_ls_shift/su_mean          0.000 
  
loop_ 
 _atom_site_label 
 _atom_site_type_symbol 
 _atom_site_fract_x 
 _atom_site_fract_y 
 _atom_site_fract_z 
 _atom_site_U_iso_or_equiv 
 _atom_site_adp_type 
 _atom_site_occupancy 
 _atom_site_site_symmetry_order 
 _atom_site_calc_flag 
 _atom_site_refinement_flags_posn 
 _atom_site_refinement_flags_adp 
 _atom_site_refinement_flags_occupancy 
 _atom_site_disorder_assembly 
 _atom_site_disorder_group 
O1 O 0.3483(2) -0.12630(17) 0.21387(9) 0.0213(3) Uani 1 1 d . . . . . 
O2 O 0.27559(18) 0.16835(16) 0.20319(9) 0.0164(3) Uani 1 1 d . . . . . 
O3 O 0.3833(2) -0.35318(17) 0.38440(10) 0.0194(3) Uani 1 1 d . . . . . 
H3 H 0.379(4) -0.304(4) 0.317(2) 0.060(8) Uiso 1 1 d . . . . . 
O4 O 0.45741(19) -0.40516(17) 0.71796(9) 0.0217(3) Uani 1 1 d . . . . . 
O5 O 0.2128(2) -0.34484(17) 0.81428(9) 0.0235(3) Uani 1 1 d . . . . . 
O6 O 0.05587(19) 0.48048(17) 0.64010(10) 0.0211(3) Uani 1 1 d . . . . . 
O7 O 0.0935(2) 0.29184(19) 0.78385(10) 0.0326(4) Uani 1 1 d . . . . . 
N1 N 0.3132(2) -0.3067(2) 0.73838(11) 0.0160(4) Uani 1 1 d . . . . . 
N2 N 0.0981(2) 0.3284(2) 0.69424(11) 0.0169(4) Uani 1 1 d . . . . . 
C1 C 0.3070(3) -0.0027(2) 0.25163(13) 0.0150(4) Uani 1 1 d . . . . . 
C2 C 0.2907(3) -0.0331(2) 0.36001(13) 0.0133(4) Uani 1 1 d . . . . . 
C3 C 0.3340(2) -0.2113(2) 0.42141(13) 0.0134(4) Uani 1 1 d . . . . . 
C4 C 0.3288(3) -0.2457(2) 0.52169(13) 0.0140(4) Uani 1 1 d . . . . . 
H4 H 0.3613 -0.3651 0.5612 0.017 Uiso 1 1 calc R U . . . 
C5 C 0.2757(2) -0.1061(2) 0.56627(13) 0.0126(4) Uani 1 1 d . . . . . 
C6 C 0.2606(3) -0.1288(2) 0.66983(13) 0.0127(4) Uani 1 1 d . . . . . 
C7 C 0.2008(2) 0.0082(2) 0.71092(13) 0.0138(4) Uani 1 1 d . . . . . 
H7 H 0.1883 -0.0132 0.7800 0.017 Uiso 1 1 calc R U . . . 
C8 C 0.1583(3) 0.1814(2) 0.64866(13) 0.0132(4) Uani 1 1 d . . . . . 
C9 C 0.1702(2) 0.2161(2) 0.54893(13) 0.0136(4) Uani 1 1 d . . . . . 
H9 H 0.1410 0.3353 0.5087 0.016 Uiso 1 1 calc R U . . . 
C10 C 0.2263(2) 0.0732(2) 0.50604(13) 0.0129(4) Uani 1 1 d . . . . . 
C11 C 0.2374(2) 0.1045(2) 0.40289(13) 0.0135(4) Uani 1 1 d . . . . . 
H11 H 0.2074 0.2234 0.3624 0.016 Uiso 1 1 calc R U . . . 
C12 C 0.2872(3) 0.2296(2) 0.09327(13) 0.0170(4) Uani 1 1 d . . . . . 
C13 C 0.1367(3) 0.1532(3) 0.05023(14) 0.0189(4) Uani 1 1 d . . . . . 
H13A H 0.1365 0.2035 -0.0211 0.028 Uiso 1 1 calc R U . . . 
H13B H 0.0057 0.1840 0.0779 0.028 Uiso 1 1 calc R U . . . 
H13C H 0.1711 0.0228 0.0661 0.028 Uiso 1 1 calc R U . . . 
C14 C 0.4962(3) 0.1776(3) 0.05837(14) 0.0214(5) Uani 1 1 d . . . . . 
H14A H 0.5050 0.2193 -0.0133 0.032 Uiso 1 1 calc R U . . . 
H14B H 0.5315 0.0471 0.0794 0.032 Uiso 1 1 calc R U . . . 
H14C H 0.5870 0.2326 0.0864 0.032 Uiso 1 1 calc R U . . . 
C15 C 0.2360(3) 0.4307(3) 0.07458(15) 0.0229(5) Uani 1 1 d . . . . . 
H15A H 0.2389 0.4878 0.0039 0.034 Uiso 1 1 calc R U . . . 
H15B H 0.3320 0.4745 0.1060 0.034 Uiso 1 1 calc R U . . . 
H15C H 0.1040 0.4598 0.1017 0.034 Uiso 1 1 calc R U . . . 
  
loop_ 
 _atom_site_aniso_label 
 _atom_site_aniso_U_11 
 _atom_site_aniso_U_22 
 _atom_site_aniso_U_33 
 _atom_site_aniso_U_23 
 _atom_site_aniso_U_13 
 _atom_site_aniso_U_12 
O1 0.0347(8) 0.0161(7) 0.0124(7) -0.0049(6) -0.0012(6) -0.0002(6) 
O2 0.0260(7) 0.0135(7) 0.0080(7) -0.0008(5) -0.0006(5) -0.0017(5) 
O3 0.0318(8) 0.0133(7) 0.0129(7) -0.0048(6) -0.0019(6) 0.0001(6) 
O4 0.0283(8) 0.0166(7) 0.0169(7) -0.0040(6) -0.0035(6) 0.0060(6) 
O5 0.0353(8) 0.0205(8) 0.0130(7) -0.0015(6) 0.0055(6) -0.0078(6) 
O6 0.0291(8) 0.0132(7) 0.0188(7) -0.0023(6) -0.0019(6) 0.0002(6) 
O7 0.0621(11) 0.0226(8) 0.0114(8) -0.0060(6) 0.0016(7) -0.0003(7) 
N1 0.0231(9) 0.0136(8) 0.0113(8) -0.0028(7) -0.0027(7) -0.0026(7) 
N2 0.0198(9) 0.0171(9) 0.0141(9) -0.0048(7) 0.0002(7) -0.0026(7) 
C1 0.0144(10) 0.0153(10) 0.0148(10) -0.0034(8) -0.0004(8) -0.0027(7) 
C2 0.0116(9) 0.0152(10) 0.0133(10) -0.0028(8) -0.0007(7) -0.0042(7) 
C3 0.0122(9) 0.0128(10) 0.0159(10) -0.0047(8) -0.0003(7) -0.0026(7) 
C4 0.0136(9) 0.0136(10) 0.0136(10) -0.0013(8) -0.0022(7) -0.0020(7) 
C5 0.0106(9) 0.0147(10) 0.0118(10) -0.0014(8) -0.0009(7) -0.0033(7) 
C6 0.0125(9) 0.0111(9) 0.0123(10) 0.0014(8) -0.0022(7) -0.0026(7) 
C7 0.0126(9) 0.0190(10) 0.0106(10) -0.0043(8) 0.0002(7) -0.0043(7) 
C8 0.0133(9) 0.0147(10) 0.0126(10) -0.0054(8) -0.0008(7) -0.0017(7) 
C9 0.0132(9) 0.0124(10) 0.0145(10) -0.0015(8) -0.0018(7) -0.0028(7) 
C10 0.0095(9) 0.0166(10) 0.0130(10) -0.0039(8) -0.0012(7) -0.0032(7) 
C11 0.0125(9) 0.0133(10) 0.0128(10) -0.0001(8) -0.0001(7) -0.0029(7) 
C12 0.0237(10) 0.0195(10) 0.0053(9) 0.0013(8) -0.0006(8) -0.0040(8) 
C13 0.0222(10) 0.0225(11) 0.0113(10) -0.0036(8) -0.0016(8) -0.0024(8) 
C14 0.0246(11) 0.0263(11) 0.0130(10) -0.0031(9) 0.0014(8) -0.0080(9) 
C15 0.0330(12) 0.0179(11) 0.0153(10) 0.0004(8) -0.0024(9) -0.0043(9) 
  
_geom_special_details 
; 
 All esds (except the esd in the dihedral angle between two l.s. planes) 
 are estimated using the full covariance matrix.  The cell esds are taken 
 into account individually in the estimation of esds in distances, angles 
 and torsion angles; correlations between esds in cell parameters are only 
 used when they are defined by crystal symmetry.  An approximate (isotropic) 
 treatment of cell esds is used for estimating esds involving l.s. planes. 
; 
  
loop_ 
 _geom_bond_atom_site_label_1 
 _geom_bond_atom_site_label_2 
 _geom_bond_distance 
 _geom_bond_site_symmetry_2 
 _geom_bond_publ_flag 
O1 C1 1.224(2) . ? 
O2 C1 1.320(2) . ? 
O2 C12 1.502(2) . ? 
O3 C3 1.351(2) . ? 
O3 H3 0.93(3) . ? 
O4 N1 1.2275(18) . ? 
O5 N1 1.2302(19) . ? 
O6 N2 1.230(2) . ? 
O7 N2 1.225(2) . ? 
N1 C6 1.471(2) . ? 
N2 C8 1.470(2) . ? 
C1 C2 1.492(2) . ? 
C2 C11 1.376(2) . ? 
C2 C3 1.426(3) . ? 
C3 C4 1.375(2) . ? 
C4 C5 1.405(2) . ? 
C4 H4 0.9500 . ? 
C5 C10 1.432(3) . ? 
C5 C6 1.432(2) . ? 
C6 C7 1.360(2) . ? 
C7 C8 1.400(3) . ? 
C7 H7 0.9500 . ? 
C8 C9 1.367(2) . ? 
C9 C10 1.415(2) . ? 
C9 H9 0.9500 . ? 
C10 C11 1.417(2) . ? 
C11 H11 0.9500 . ? 
C12 C15 1.517(3) . ? 
C12 C14 1.518(3) . ? 
C12 C13 1.521(3) . ? 
C13 H13A 0.9800 . ? 
C13 H13B 0.9800 . ? 
C13 H13C 0.9800 . ? 
C14 H14A 0.9800 . ? 
C14 H14B 0.9800 . ? 
C14 H14C 0.9800 . ? 
C15 H15A 0.9800 . ? 
C15 H15B 0.9800 . ? 
C15 H15C 0.9800 . ? 
  
loop_ 
 _geom_angle_atom_site_label_1 
 _geom_angle_atom_site_label_2 
 _geom_angle_atom_site_label_3 
 _geom_angle 
 _geom_angle_site_symmetry_1 
 _geom_angle_site_symmetry_3 
 _geom_angle_publ_flag 
C1 O2 C12 121.84(13) . . ? 
C3 O3 H3 104.6(16) . . ? 
O4 N1 O5 124.20(16) . . ? 
O4 N1 C6 118.24(14) . . ? 
O5 N1 C6 117.52(14) . . ? 
O7 N2 O6 124.02(15) . . ? 
O7 N2 C8 117.95(15) . . ? 
O6 N2 C8 118.02(15) . . ? 
O1 C1 O2 124.99(17) . . ? 
O1 C1 C2 122.13(16) . . ? 
O2 C1 C2 112.87(14) . . ? 
C11 C2 C3 118.82(17) . . ? 
C11 C2 C1 122.44(16) . . ? 
C3 C2 C1 118.73(15) . . ? 
O3 C3 C4 116.94(16) . . ? 
O3 C3 C2 122.03(16) . . ? 
C4 C3 C2 121.03(16) . . ? 
C3 C4 C5 120.61(17) . . ? 
C3 C4 H4 119.7 . . ? 
C5 C4 H4 119.7 . . ? 
C4 C5 C10 119.26(16) . . ? 
C4 C5 C6 124.84(16) . . ? 
C10 C5 C6 115.88(15) . . ? 
C7 C6 C5 123.51(16) . . ? 
C7 C6 N1 116.13(15) . . ? 
C5 C6 N1 120.35(15) . . ? 
C6 C7 C8 118.25(16) . . ? 
C6 C7 H7 120.9 . . ? 
C8 C7 H7 120.9 . . ? 
C9 C8 C7 122.32(16) . . ? 
C9 C8 N2 120.10(16) . . ? 
C7 C8 N2 117.58(16) . . ? 
C8 C9 C10 119.50(16) . . ? 
C8 C9 H9 120.3 . . ? 
C10 C9 H9 120.3 . . ? 
C9 C10 C11 120.84(16) . . ? 
C9 C10 C5 120.49(16) . . ? 
C11 C10 C5 118.66(15) . . ? 
C2 C11 C10 121.57(17) . . ? 
C2 C11 H11 119.2 . . ? 
C10 C11 H11 119.2 . . ? 
O2 C12 C15 101.40(13) . . ? 
O2 C12 C14 109.23(15) . . ? 
C15 C12 C14 111.27(16) . . ? 
O2 C12 C13 110.21(14) . . ? 
C15 C12 C13 111.67(16) . . ? 
C14 C12 C13 112.50(15) . . ? 
C12 C13 H13A 109.5 . . ? 
C12 C13 H13B 109.5 . . ? 
H13A C13 H13B 109.5 . . ? 
C12 C13 H13C 109.5 . . ? 
H13A C13 H13C 109.5 . . ? 
H13B C13 H13C 109.5 . . ? 
C12 C14 H14A 109.5 . . ? 
C12 C14 H14B 109.5 . . ? 
H14A C14 H14B 109.5 . . ? 
C12 C14 H14C 109.5 . . ? 
H14A C14 H14C 109.5 . . ? 
H14B C14 H14C 109.5 . . ? 
C12 C15 H15A 109.5 . . ? 
C12 C15 H15B 109.5 . . ? 
H15A C15 H15B 109.5 . . ? 
C12 C15 H15C 109.5 . . ? 
H15A C15 H15C 109.5 . . ? 
H15B C15 H15C 109.5 . . ? 
  
loop_ 
 _geom_torsion_atom_site_label_1 
 _geom_torsion_atom_site_label_2 
 _geom_torsion_atom_site_label_3 
 _geom_torsion_atom_site_label_4 
 _geom_torsion 
 _geom_torsion_site_symmetry_1 
 _geom_torsion_site_symmetry_2 
 _geom_torsion_site_symmetry_3 
 _geom_torsion_site_symmetry_4 
 _geom_torsion_publ_flag 
C12 O2 C1 O1 0.3(3) . . . . ? 
C12 O2 C1 C2 179.20(14) . . . . ? 
O1 C1 C2 C11 -177.61(17) . . . . ? 
O2 C1 C2 C11 3.4(2) . . . . ? 
O1 C1 C2 C3 3.1(3) . . . . ? 
O2 C1 C2 C3 -175.91(15) . . . . ? 
C11 C2 C3 O3 178.61(16) . . . . ? 
C1 C2 C3 O3 -2.0(3) . . . . ? 
C11 C2 C3 C4 -1.9(3) . . . . ? 
C1 C2 C3 C4 177.40(16) . . . . ? 
O3 C3 C4 C5 -178.95(16) . . . . ? 
C2 C3 C4 C5 1.6(3) . . . . ? 
C3 C4 C5 C10 0.2(3) . . . . ? 
C3 C4 C5 C6 178.15(17) . . . . ? 
C4 C5 C6 C7 -177.12(17) . . . . ? 
C10 C5 C6 C7 0.9(3) . . . . ? 
C4 C5 C6 N1 3.7(3) . . . . ? 
C10 C5 C6 N1 -178.31(15) . . . . ? 
O4 N1 C6 C7 -139.64(17) . . . . ? 
O5 N1 C6 C7 38.1(2) . . . . ? 
O4 N1 C6 C5 39.6(2) . . . . ? 
O5 N1 C6 C5 -142.66(17) . . . . ? 
C5 C6 C7 C8 -2.3(3) . . . . ? 
N1 C6 C7 C8 176.97(15) . . . . ? 
C6 C7 C8 C9 1.6(3) . . . . ? 
C6 C7 C8 N2 -178.68(16) . . . . ? 
O7 N2 C8 C9 -178.45(17) . . . . ? 
O6 N2 C8 C9 1.4(3) . . . . ? 
O7 N2 C8 C7 1.9(2) . . . . ? 
O6 N2 C8 C7 -178.28(15) . . . . ? 
C7 C8 C9 C10 0.3(3) . . . . ? 
N2 C8 C9 C10 -179.34(15) . . . . ? 
C8 C9 C10 C11 179.15(17) . . . . ? 
C8 C9 C10 C5 -1.7(3) . . . . ? 
C4 C5 C10 C9 179.27(16) . . . . ? 
C6 C5 C10 C9 1.2(2) . . . . ? 
C4 C5 C10 C11 -1.6(2) . . . . ? 
C6 C5 C10 C11 -179.72(16) . . . . ? 
C3 C2 C11 C10 0.5(3) . . . . ? 
C1 C2 C11 C10 -178.82(16) . . . . ? 
C9 C10 C11 C2 -179.64(17) . . . . ? 
C5 C10 C11 C2 1.2(3) . . . . ? 
C1 O2 C12 C15 178.71(15) . . . . ? 
C1 O2 C12 C14 -63.8(2) . . . . ? 
C1 O2 C12 C13 60.3(2) . . . . ? 
  
loop_ 
 _geom_hbond_atom_site_label_D 
 _geom_hbond_atom_site_label_H 
 _geom_hbond_atom_site_label_A 
 _geom_hbond_distance_DH 
 _geom_hbond_distance_HA 
 _geom_hbond_distance_DA 
 _geom_hbond_angle_DHA 
 _geom_hbond_site_symmetry_A 
O3 H3 O1  0.93(3) 1.72(3) 2.5779(19) 152(2) . 
  
_refine_diff_density_max    0.222 
_refine_diff_density_min   -0.258 
_refine_diff_density_rms    0.049 
  
_shelx_res_file 
; 
  
    FW155_0m.res created by SHELXL-2014/7 
  
  
TITL FW155_0m in P-1 
CELL 0.71073 6.8857    7.8782   14.2300   73.669   85.904   80.621 
ZERR 2.00  0.0011    0.0012    0.0021    0.005    0.005    0.005 
LATT 1 
SFAC C H N O 
UNIT 30 28 4 14 
LIST 4 ! automatically inserted. Change 6 to 4 for CHECKCIF!! 
TEMP -173.140 
ACTA 
L.S. 12 
FMAP 2 
PLAN -4 0 0.00 
HTAB 
BOND $H 
CONF 
HTAB O3 O1 
size 0.05 0.08 0.33 
REM ##### 
WGHT    0.045500    0.233000 
FVAR       0.68583 
O1    4    0.348292   -0.126295    0.213869    11.00000    0.03474    0.01612 = 
         0.01240   -0.00492   -0.00120   -0.00019 
O2    4    0.275585    0.168347    0.203188    11.00000    0.02603    0.01345 = 
         0.00796   -0.00080   -0.00056   -0.00171 
O3    4    0.383254   -0.353184    0.384400    11.00000    0.03177    0.01335 = 
         0.01294   -0.00477   -0.00186    0.00007 
H3    2    0.378684   -0.304371    0.316766    11.00000    0.05973 
O4    4    0.457409   -0.405163    0.717960    11.00000    0.02831    0.01660 = 
         0.01687   -0.00399   -0.00353    0.00600 
O5    4    0.212778   -0.344844    0.814283    11.00000    0.03527    0.02048 = 
         0.01302   -0.00151    0.00554   -0.00775 
O6    4    0.055872    0.480481    0.640104    11.00000    0.02912    0.01318 = 
         0.01881   -0.00229   -0.00188    0.00017 
O7    4    0.093531    0.291844    0.783847    11.00000    0.06214    0.02260 = 
         0.01139   -0.00603    0.00165   -0.00029 
N1    3    0.313191   -0.306710    0.738383    11.00000    0.02308    0.01358 = 
         0.01129   -0.00284   -0.00269   -0.00259 
N2    3    0.098129    0.328366    0.694237    11.00000    0.01978    0.01707 = 
         0.01411   -0.00480    0.00023   -0.00263 
C1    1    0.306973   -0.002735    0.251633    11.00000    0.01443    0.01532 = 
         0.01482   -0.00340   -0.00040   -0.00266 
C2    1    0.290686   -0.033124    0.360014    11.00000    0.01162    0.01521 = 
         0.01330   -0.00284   -0.00068   -0.00422 
C3    1    0.333959   -0.211276    0.421408    11.00000    0.01222    0.01281 = 
         0.01588   -0.00467   -0.00033   -0.00260 
C4    1    0.328768   -0.245747    0.521689    11.00000    0.01359    0.01359 = 
         0.01357   -0.00134   -0.00224   -0.00197 
AFIX  43 
H4    2    0.361330   -0.365081    0.561223    11.00000   -1.20000 
AFIX   0 
C5    1    0.275746   -0.106119    0.566268    11.00000    0.01059    0.01467 = 
         0.01183   -0.00140   -0.00088   -0.00332 
C6    1    0.260586   -0.128775    0.669830    11.00000    0.01253    0.01107 = 
         0.01226    0.00137   -0.00218   -0.00259 
C7    1    0.200819    0.008171    0.710918    11.00000    0.01262    0.01897 = 
         0.01059   -0.00431    0.00017   -0.00425 
AFIX  43 
H7    2    0.188277   -0.013195    0.780030    11.00000   -1.20000 
AFIX   0 
C8    1    0.158278    0.181443    0.648661    11.00000    0.01329    0.01469 = 
         0.01259   -0.00536   -0.00077   -0.00171 
C9    1    0.170174    0.216131    0.548934    11.00000    0.01317    0.01242 = 
         0.01446   -0.00146   -0.00183   -0.00277 
AFIX  43 
H9    2    0.140981    0.335338    0.508723    11.00000   -1.20000 
AFIX   0 
C10   1    0.226289    0.073181    0.506040    11.00000    0.00950    0.01664 = 
         0.01303   -0.00386   -0.00117   -0.00322 
C11   1    0.237415    0.104508    0.402892    11.00000    0.01248    0.01328 = 
         0.01284   -0.00012   -0.00010   -0.00291 
AFIX  43 
H11   2    0.207375    0.223380    0.362373    11.00000   -1.20000 
AFIX   0 
C12   1    0.287218    0.229600    0.093266    11.00000    0.02374    0.01950 = 
         0.00530    0.00126   -0.00061   -0.00401 
C13   1    0.136747    0.153172    0.050230    11.00000    0.02215    0.02251 = 
         0.01127   -0.00362   -0.00157   -0.00239 
AFIX 137 
H13A  2    0.136478    0.203459   -0.021072    11.00000   -1.50000 
H13B  2    0.005673    0.184037    0.077910    11.00000   -1.50000 
H13C  2    0.171117    0.022764    0.066116    11.00000   -1.50000 
AFIX   0 
C14   1    0.496214    0.177555    0.058366    11.00000    0.02457    0.02628 = 
         0.01304   -0.00315    0.00139   -0.00803 
AFIX 137 
H14A  2    0.504974    0.219308   -0.013282    11.00000   -1.50000 
H14B  2    0.531507    0.047138    0.079432    11.00000   -1.50000 
H14C  2    0.587043    0.232632    0.086425    11.00000   -1.50000 
AFIX   0 
C15   1    0.236005    0.430716    0.074576    11.00000    0.03299    0.01791 = 
         0.01528    0.00043   -0.00236   -0.00428 
AFIX 137 
H15A  2    0.238924    0.487792    0.003876    11.00000   -1.50000 
H15B  2    0.332044    0.474534    0.106030    11.00000   -1.50000 
H15C  2    0.103952    0.459785    0.101744    11.00000   -1.50000 
REM ##### 
AFIX   0 
HKLF 4 1 1 0 0 0 1 0 0 0 1 
  
REM  FW155_0m in P-1 
REM R1 =  0.0397 for    1964 Fo > 4sig(Fo)  and  0.0637 for all    2633 data 
REM    224 parameters refined using      0 restraints 
  
END 
  
WGHT      0.0455      0.2330 
  
REM Instructions for potential hydrogen bonds 
HTAB O3 O1 
EQIV $1 -x+1, -y-1, -z+1 
HTAB C4 O3_$1 
HTAB C4 O4 
EQIV $2 x, y-1, z 
HTAB C4 O6_$2 
EQIV $3 -x, -y+1, -z+1 
HTAB C9 O6_$3 
EQIV $4 -x, -y, -z+1 
HTAB C13 O5_$4 
HTAB C13 O1 
HTAB C14 O1 
EQIV $5 -x+1, -y, -z+1 
HTAB C14 O5_$5 
EQIV $6 x, y+1, z-1 
HTAB C15 O5_$6 
HTAB C15 O5_$4 
  
REM Highest difference peak  0.222,  deepest hole -0.258,  1-sigma level  0.049 
Q1    1   0.3268  0.0185  0.3831  11.00000  0.05    0.22 
Q2    1   0.2231  0.2055  0.6032  11.00000  0.05    0.21 
Q3    1   0.3008 -0.0137  0.3200  11.00000  0.05    0.21 
Q4    1   0.2877 -0.1144  0.6221  11.00000  0.05    0.21 
; 
_shelx_res_checksum   42166 
  
_shelx_hkl_file 
; 
  -1   0   0 42.2702 2.41717   2 
  -1   0   0 39.4929 1.87357   2 
  -1   0   0 40.2369 1.66422   1 
   1   0   0 37.5958 1.65661   1 
   1   0   0 39.8972 2.62019   2 
   1   0   0 38.3575 1.85395   2 
  -2   0   0 3287.11 69.5826   2 
  -2   0   0 3330.08 70.1127   2 
  -2   0   0 3385.39 69.3210   1 
   2   0   0 3282.15 70.2127   2 
   2   0   0 3303.88 69.3495   1 
   2   0   0 3337.76 69.4672   2 
  -3   0   0 25.4116 2.73161   2 
  -3   0   0 25.6453 3.31772   2 
  -3   0   0 26.9296 2.39394   1 
   3   0   0 21.5485 3.82017   2 
   3   0   0 25.8963 2.87694   2 
   3   0   0 30.2722 2.57301   1 
  -4   0   0 69.7240 5.35696   2 
  -4   0   0 68.3952 3.76560   1 
  -4   0   0 62.1247 6.33420   2 
   4   0   0 64.5295 7.52675   2 
   4   0   0 69.7617 4.35824   2 
   4   0   0 69.1697 3.90422   1 
  -5   0   0 170.193 8.47136   2 
  -5   0   0 161.487 10.2567   2 
  -5   0   0 170.212 6.40122   1 
   5   0   0 171.135 7.35212   2 
   5   0   0 168.515 6.73015   1 
   5   0   0 168.953 10.9837   2 
  -6   0   0 10.3059 5.17614   2 
  -6   0   0 5.94631 2.51374   1 
  -6   0   0 9.61942 6.91703   2 
   6   0   0 -2.1056 7.48737   2 
   6   0   0 7.24245 3.69263   2 
   6   0   0 2.13587 2.75097   1 
  -7   0   0 1.37216 3.50750   1 
  -7   0   0 4.44170 6.63005   2 
  -7   0   0 9.86673 8.74095   2 
   7   0   0 -3.3332 3.88318   1 
   7   0   0 9.46086 4.66215   2 
   7   0   0 -4.3132 10.6062   2 
  -8   0   0 2.57256 9.44590   2 
  -8   0   0 0.06641 11.8624   2 
  -8   0   0 -7.2255 5.10209   1 
   8   0   0 -7.0164 6.48115   2 
   8   0   0 -18.649 15.1059   2 
   8   0   0 -3.4364 5.71795   1 
   7  -1   0 -3.6337 4.04657   1 
   7  -1   0 -19.211 10.9589   2 
   7  -1   0 -1.0888 4.42963   2 
  -7   1   0 5.41584 3.72475   1 
  -7   1   0 3.35983 7.01908   2 
  -7   1   0 8.72785 8.76346   2 
   6  -1   0 -3.1735 2.82400   1 
   6  -1   0 1.87855 8.60188   2 
  -6   1   0 4.53234 6.44605   2 
  -6   1   0 4.73651 4.97072   2 
  -6   1   0 0.43199 2.52083   1 
   5  -1   0 -2.1187 2.09706   1 
   5  -1   0 -2.5020 5.61217   2 
   5  -1   0 -2.4279 2.34693   2 
  -5   1   0 -0.8141 3.29246   2 
  -5   1   0 -0.7415 1.92948   1 
  -5   1   0 -0.3620 4.69852   2 
   4  -1   0 6.74670 4.58983   2 
   4  -1   0 9.44302 1.96016   1 
   4  -1   0 7.77694 2.11639   2 
  -4   1   0 10.7803 1.83559   1 
  -4   1   0 6.35161 3.30627   2 
  -4   1   0 10.2083 2.62708   2 
   3  -1   0 14.4933 1.86983   2 
   3  -1   0 15.3560 1.95172   1 
   3  -1   0 10.0955 3.26798   2 
  -3   1   0 14.7407 2.22418   2 
  -3   1   0 19.3896 3.25065   2 
  -3   1   0 14.5215 1.84906   1 
   2  -1   0 202.519 5.65321   1 
   2  -1   0 199.151 6.83887   2 
   2  -1   0 201.627 5.41848   2 
  -2   1   0 204.753 5.60533   1 
  -2   1   0 201.594 5.68307   2 
  -2   1   0 193.830 6.30617   2 
   1  -1   0 37.7249 1.83438   1 
   1  -1   0 37.2438 1.57602   2 
  -1   1   0 33.8155 2.39265   2 
  -1   1   0 36.8503 1.69395   2 
  -1   1   0 37.9086 1.82467   1 
   0  -1   0 627.024 13.3734   2 
   0   1   0 624.927 13.3235   2 
   0   1   0 621.463 13.1817   2 
  -1  -1   0 108.633 4.11183   2 
  -1  -1   0 107.787 3.38567   2 
  -1  -1   0 109.886 2.81588   1 
   1   1   0 107.659 4.03593   2 
   1   1   0 106.664 3.41095   2 
   1   1   0 107.928 2.80400   1 
  -2  -1   0 9999.99 204.502   1 
  -2  -1   0 9702.90 204.097   2 
  -2  -1   0 9978.31 203.949   2 
   2   1   0 9581.83 203.841   2 
   2   1   0 9983.75 204.836   1 
   2   1   0 9783.57 205.527   2 
  -3  -1   0 -1.8113 2.71724   2 
  -3  -1   0 0.47294 1.98332   2 
  -3  -1   0 -0.1283 1.13788   1 
   3   1   0 3.32515 3.18782   2 
   3   1   0 0.88899 1.76312   2 
   3   1   0 -1.4141 1.19872   1 
  -4  -1   0 232.313 9.66332   2 
  -4  -1   0 217.003 6.93508   1 
  -4  -1   0 226.243 8.26640   2 
   4   1   0 212.242 7.09432   1 
   4   1   0 225.150 7.87802   2 
   4   1   0 225.387 9.99075   2 
  -5  -1   0 69.4635 6.74296   2 
  -5  -1   0 75.2818 4.48846   1 
  -5  -1   0 72.3748 8.69019   2 
   5   1   0 71.1391 4.68746   1 
   5   1   0 71.2379 7.69710   2 
   5   1   0 73.1324 6.19938   2 
  -6  -1   0 71.4678 8.50397   2 
  -6  -1   0 89.1972 5.93730   1 
  -6  -1   0 90.6680 9.15817   2 
   6   1   0 77.7785 9.86148   2 
   6   1   0 86.6153 7.78362   2 
   6   1   0 65.9295 6.97802   1 
  -7  -1   0 85.8704 9.39913   2 
  -7  -1   0 93.1134 11.0491   2 
  -7  -1   0 97.8143 7.29188   1 
   7   1   0 87.0833 12.7213   2 
   7   1   0 95.2783 7.79495   1 
   7   1   0 92.6947 9.94932   2 
  -8  -1   0 9.33545 5.44630   1 
  -8  -1   0 -5.6076 9.77198   2 
  -8  -1   0 2.33918 13.1455   2 
   8   1   0 32.3761 15.4686   2 
   8   1   0 13.2335 7.36302   2 
   8   1   0 -0.3590 5.84639   1 
   7  -2   0 -0.8150 12.5492   2 
   7  -2   0 1.85439 4.19017   1 
   7  -2   0 -1.1336 4.51191   2 
  -7   2   0 -7.1749 8.84938   2 
  -7   2   0 -9.6521 3.58956   1 
  -7   2   0 -4.1119 7.38183   2 
   6  -2   0 32.5077 4.26257   2 
   6  -2   0 39.6199 9.80777   2 
   6  -2   0 32.0218 4.31679   1 
  -6   2   0 28.3943 3.72434   1 
  -6   2   0 31.3157 7.21376   2 
  -6   2   0 27.1308 5.90665   2 
   5  -2   0 41.8215 4.57058   1 
   5  -2   0 45.7889 7.27535   2 
   5  -2   0 53.1116 4.58130   2 
  -5   2   0 48.2997 4.26691   1 
  -5   2   0 50.8239 6.20279   2 
  -5   2   0 53.0003 6.09885   2 
   4  -2   0 32.1538 3.46297   1 
   4  -2   0 26.2730 5.37750   2 
   4  -2   0 34.8340 3.25046   2 
  -4   2   0 27.1634 3.04996   1 
  -4   2   0 31.3656 4.33605   2 
  -4   2   0 33.4832 3.67485   2 
   3  -2   0 23.9804 2.26937   2 
   3  -2   0 19.5505 2.22934   1 
   3  -2   0 18.6611 3.61275   2 
  -3   2   0 20.4953 2.31973   1 
  -3   2   0 20.1231 2.47652   2 
  -3   2   0 20.6361 3.14644   2 
   2  -2   0 5.78506 1.39517   1 
   2  -2   0 6.68957 1.08446   2 
  -2   2   0 5.65007 1.27329   1 
  -2   2   0 7.08602 1.90134   2 
  -2   2   0 6.04568 1.35639   2 
   1  -2   0 311.856 7.26582   2 
   1  -2   0 306.674 7.32685   1 
  -1   2   0 309.298 7.48966   2 
  -1   2   0 298.579 7.21166   2 
  -1   2   0 300.113 7.19450   1 
   0   2   0 404.591 9.04270   2 
   0   2   0 398.309 9.24148   2 
  -1  -2   0 129.384 4.00159   2 
  -1  -2   0 135.155 5.18819   2 
   1   2   0 124.155 4.84498   2 
   1   2   0 140.178 4.28954   2 
  -2  -2   0 1.58470 0.84428   1 
  -2  -2   0 3.46978 1.61842   2 
  -2  -2   0 1.37309 2.42635   2 
   2   2   0 -0.1942 1.53327   2 
   2   2   0 4.23273 2.39707   2 
   2   2   0 1.09536 0.94726   1 
  -3  -2   0 17.3524 2.73434   2 
  -3  -2   0 15.1689 1.77646   1 
  -3  -2   0 19.5182 3.66002   2 
   3   2   0 18.1453 3.34073   2 
   3   2   0 15.8740 2.53543   2 
   3   2   0 14.4399 1.77453   1 
  -4  -2   0 1184.50 26.4651   1 
  -4  -2   0 1184.32 29.3619   2 
  -4  -2   0 1159.96 27.7122   2 
   4   2   0 1181.85 27.8700   2 
   4   2   0 1202.72 26.7409   1 
   4   2   0 1182.23 29.2998   2 
  -5  -2   0 49.1271 4.28191   1 
  -5  -2   0 45.1420 6.28643   2 
  -5  -2   0 50.2393 5.07205   2 
   5   2   0 47.0278 6.93268   2 
   5   2   0 51.0386 4.28015   1 
   5   2   0 47.9289 5.03468   2 
  -6  -2   0 89.3733 9.85103   2 
  -6  -2   0 89.0888 5.92886   1 
  -6  -2   0 81.0774 7.48538   2 
   6   2   0 119.889 13.5269   2 
   6   2   0 93.2044 6.50683   1 
   6   2   0 91.3654 8.45139   2 
  -7  -2   0 18.2029 4.44833   1 
  -7  -2   0 23.1813 9.59344   2 
  -7  -2   0 20.7455 7.67432   2 
   7   2   0 19.0973 10.2173   2 
   7   2   0 22.3774 5.09032   1 
  -8  -2   0 10.2551 13.9451   2 
  -8  -2   0 4.54271 5.87134   1 
   8   2   0 5.63529 6.17377   1 
   8   2   0 21.0034 14.2957   2 
   8   2   0 3.52981 7.55767   2 
   7  -3   0 41.7614 15.4326   2 
   7  -3   0 9.94683 4.29800   2 
   7  -3   0 9.23836 5.65291   1 
  -7   3   0 8.73749 8.44691   2 
  -7   3   0 20.3932 9.18269   2 
  -7   3   0 8.67018 5.11056   1 
   6  -3   0 21.0069 3.64892   2 
   6  -3   0 36.3698 10.8623   2 
   6  -3   0 20.6956 4.46093   1 
  -6   3   0 20.5325 5.76605   2 
  -6   3   0 21.7299 4.21221   1 
  -6   3   0 27.1962 7.09541   2 
   5  -3   0 1.84593 3.14409   1 
   5  -3   0 3.44304 2.19112   2 
   5  -3   0 -9.7975 6.79887   2 
  -5   3   0 8.66911 4.84294   2 
  -5   3   0 6.42926 3.12291   1 
  -5   3   0 3.81645 4.00007   2 
   4  -3   0 16.0554 2.24195   2 
   4  -3   0 11.5261 2.56487   1 
  -4   3   0 13.1310 2.44704   1 
  -4   3   0 12.8487 3.81849   2 
  -4   3   0 12.8419 2.93963   2 
   3  -3   0 44.4637 3.54930   1 
   3  -3   0 42.5783 2.72302   2 
  -3   3   0 44.8595 4.64039   2 
  -3   3   0 43.2849 3.62492   2 
  -3   3   0 46.9655 3.39890   1 
   2  -3   0 6.00139 1.16209   2 
   2  -3   0 4.96886 1.48065   1 
  -2   3   0 5.42593 1.45354   1 
  -2   3   0 3.70845 1.46383   2 
  -2   3   0 1.12050 1.70471   2 
   1  -3   0 57.6487 2.75169   2 
   1  -3   0 58.7289 2.64036   1 
  -1   3   0 57.2493 2.36466   1 
  -1   3   0 58.0262 2.57491   2 
  -1   3   0 54.1127 2.83368   2 
   0   3   0 28.6673 2.23387   2 
   0   3   0 26.9490 2.13222   2 
  -1  -3   0 13.4317 1.62038   2 
  -1  -3   0 14.5385 2.41452   2 
   1   3   0 17.1593 1.88562   2 
   1   3   0 18.1855 2.42358   2 
  -2  -3   0 11.0128 2.86552   2 
  -2  -3   0 9.42447 2.02911   2 
   2   3   0 11.0916 2.12395   2 
   2   3   0 15.2832 2.91040   2 
  -3  -3   0 56.1771 6.38796   2 
  -3  -3   0 61.3888 2.99250   1 
  -3  -3   0 57.1081 4.62373   2 
   3   3   0 56.7231 6.02588   2 
   3   3   0 63.8720 4.69398   2 
   3   3   0 60.1268 2.98157   1 
  -4  -3   0 72.4837 7.87620   2 
  -4  -3   0 68.3194 3.81358   1 
  -4  -3   0 80.5966 5.96216   2 
   4   3   0 63.8325 7.72454   2 
   4   3   0 80.9190 5.92626   2 
   4   3   0 67.7070 3.83190   1 
  -5  -3   0 21.8928 4.51731   2 
  -5  -3   0 19.3784 6.83334   2 
  -5  -3   0 34.5702 4.00599   1 
   5   3   0 15.8013 4.46828   2 
   5   3   0 18.3991 6.46852   2 
   5   3   0 24.3303 3.13172   1 
  -6  -3   0 147.825 7.31071   1 
  -6  -3   0 174.672 14.3297   2 
  -6  -3   0 185.809 11.3420   2 
   6   3   0 165.595 10.7626   2 
   6   3   0 138.083 13.6750   2 
   6   3   0 161.109 8.02841   1 
  -7  -3   0 15.6905 7.61309   2 
  -7  -3   0 7.71840 4.21149   1 
  -7  -3   0 7.41495 10.8296   2 
   7   3   0 10.2849 4.85636   1 
   7   3   0 -6.6192 9.83570   2 
   7   3   0 7.48593 6.87767   2 
  -8  -3   0 -6.8120 13.7607   2 
  -8  -3   0 26.6706 10.9109   2 
  -8  -3   0 0.88491 5.87611   1 
   8   3   0 -8.2536 14.3656   2 
   8   3   0 -2.1795 6.42389   1 
   8   3   0 21.7896 10.1480   2 
   6  -4   0 78.6699 6.37422   2 
   6  -4   0 72.0933 7.29722   1 
  -6   4   0 80.8707 8.26924   2 
  -6   4   0 96.2894 8.04546   1 
  -6   4   0 76.3523 8.60094   2 
   5  -4   0 2.51211 3.62768   1 
   5  -4   0 1.79676 2.48594   2 
  -5   4   0 -2.0073 5.02471   2 
  -5   4   0 5.18477 3.05598   1 
  -5   4   0 -0.4912 3.91684   2 
   4  -4   0 14.4804 3.25099   1 
  -4   4   0 11.2433 2.55360   1 
  -4   4   0 12.9975 3.26003   2 
  -4   4   0 7.09038 3.89444   2 
   3  -4   0 223.624 6.84558   2 
   3  -4   0 223.948 7.70615   1 
  -3   4   0 226.460 7.06476   1 
  -3   4   0 226.952 7.74040   2 
  -3   4   0 223.642 7.96726   2 
   2  -4   0 28.4820 2.85244   2 
   2  -4   0 29.2566 3.13674   1 
  -2   4   0 29.9826 3.33062   2 
  -2   4   0 34.6907 2.80805   1 
  -2   4   0 27.3899 2.89311   2 
   1  -4   0 30.9459 2.47794   1 
   1  -4   0 35.8265 2.82667   2 
  -1   4   0 33.6585 2.62745   2 
  -1   4   0 36.7351 2.68731   2 
  -1   4   0 29.1284 2.06927   1 
   0  -4   0 48.1458 3.83361   2 
   0   4   0 48.4437 3.17930   2 
   0   4   0 49.9697 3.05583   2 
  -1  -4   0 933.438 20.6909   2 
  -1  -4   0 904.443 22.0681   2 
   1   4   0 919.633 21.3946   2 
   1   4   0 929.558 21.0088   2 
  -2  -4   0 3.23277 2.76352   2 
  -2  -4   0 -0.3979 1.93046   2 
   2   4   0 0.76026 2.12569   2 
   2   4   0 -0.6664 2.71631   2 
  -3  -4   0 36.2089 5.38191   2 
  -3  -4   0 29.4262 3.33250   2 
   3   4   0 30.6936 3.89128   2 
   3   4   0 39.2761 4.88825   2 
  -4  -4   0 5.25740 1.75073   1 
  -4  -4   0 5.88269 4.87289   2 
  -4  -4   0 2.07066 3.41459   2 
   4   4   0 3.79776 4.28350   2 
   4   4   0 7.38776 3.85958   2 
   4   4   0 2.66592 1.82667   1 
  -5  -4   0 51.3951 8.54267   2 
  -5  -4   0 46.6751 5.88819   2 
  -5  -4   0 47.9272 4.29988   1 
   5   4   0 49.7586 7.30181   2 
   5   4   0 47.1953 4.75255   1 
   5   4   0 51.1358 6.17101   2 
  -6  -4   0 27.4681 6.09168   2 
  -6  -4   0 25.2966 3.89164   1 
  -6  -4   0 25.9188 9.40503   2 
   6   4   0 18.2070 8.31551   2 
   6   4   0 23.2436 6.38518   2 
   6   4   0 22.5161 4.21326   1 
  -7  -4   0 22.3829 8.12609   2 
  -7  -4   0 14.9126 4.66151   1 
  -7  -4   0 21.5016 15.8344   2 
   7   4   0 19.6744 8.74254   2 
   7   4   0 3.71060 10.8886   2 
   7   4   0 14.6937 5.18564   1 
   6  -5   0 342.891 22.4449   2 
   6  -5   0 297.697 11.2326   2 
   6  -5   0 309.817 14.2825   1 
  -6   5   0 304.500 12.3122   1 
  -6   5   0 308.275 15.9615   2 
  -6   5   0 304.952 16.8164   2 
   5  -5   0 27.4593 10.0876   2 
   5  -5   0 32.3476 3.95346   2 
   5  -5   0 29.6052 5.46881   1 
  -5   5   0 31.7418 5.94547   2 
  -5   5   0 22.7456 3.97692   1 
  -5   5   0 25.1686 6.10909   2 
   4  -5   0 11.7184 2.75346   2 
   4  -5   0 9.62965 3.47068   1 
   4  -5   0 14.5247 7.06121   2 
  -4   5   0 7.81809 3.87838   2 
  -4   5   0 9.82799 3.09621   1 
  -4   5   0 9.62648 4.16479   2 
   3  -5   0 93.4098 5.88237   2 
   3  -5   0 96.1379 5.75549   1 
   3  -5   0 91.5894 8.63482   2 
  -3   5   0 109.330 5.84040   2 
  -3   5   0 106.904 5.08812   1 
  -3   5   0 91.7555 5.71336   2 
   2  -5   0 8.84128 2.28831   1 
   2  -5   0 9.63284 2.35683   2 
   2  -5   0 8.69803 3.70270   2 
  -2   5   0 8.60708 2.34246   2 
  -2   5   0 5.48873 1.98638   1 
  -2   5   0 6.92053 2.22173   2 
   1  -5   0 3.56249 2.59661   2 
   1  -5   0 10.9744 1.87739   1 
   1  -5   0 9.84021 2.35816   2 
  -1   5   0 11.1735 2.15225   2 
  -1   5   0 14.0307 2.28873   2 
   0  -5   0 7.29755 2.98341   2 
   0   5   0 3.84967 2.10897   2 
   0   5   0 2.54101 1.93446   2 
  -1  -5   0 393.715 12.2848   2 
   1   5   0 400.799 10.8845   2 
   1   5   0 393.991 11.0471   2 
  -2  -5   0 2.52216 2.14877   2 
  -2  -5   0 5.30279 3.92733   2 
   2   5   0 4.58967 2.57336   2 
  -3  -5   0 19.4465 3.18779   2 
  -3  -5   0 21.9114 5.19172   2 
   3   5   0 18.0857 4.84394   2 
   3   5   0 14.5804 4.09568   2 
  -4  -5   0 29.5631 4.59819   2 
  -4  -5   0 46.9691 6.76198   2 
   4   5   0 38.0063 5.14415   2 
   4   5   0 35.7439 5.96186   2 
  -5  -5   0 11.0346 4.94687   2 
  -5  -5   0 14.7214 7.84263   2 
  -5  -5   0 12.0287 2.70806   1 
   5   5   0 6.00453 5.68028   2 
   5   5   0 17.5603 6.13945   2 
   5   5   0 11.7213 3.03197   1 
  -6  -5   0 2.25493 3.34098   1 
  -6  -5   0 -11.326 5.92103   2 
  -6  -5   0 4.33703 11.2893   2 
   6   5   0 0.69364 8.62730   2 
   6   5   0 8.47147 3.79892   1 
   6   5   0 -10.088 6.63163   2 
  -7  -5   0 44.5825 14.0993   2 
  -7  -5   0 31.3763 5.07162   1 
  -7  -5   0 40.2137 9.35950   2 
   7   5   0 30.6505 12.1269   2 
   7   5   0 40.8653 9.60774   2 
   7   5   0 46.8206 6.14941   1 
   5  -6   0 21.0394 4.95653   2 
   5  -6   0 20.9862 5.82848   1 
   5  -6   0 24.2358 12.2096   2 
  -5   6   0 22.7509 6.57030   2 
  -5   6   0 22.3538 6.60971   2 
  -5   6   0 12.9326 4.70800   1 
   4  -6   0 41.6809 4.56029   2 
   4  -6   0 35.0232 5.26701   1 
   4  -6   0 40.9494 9.00743   2 
  -4   6   0 32.0483 4.01972   1 
  -4   6   0 41.4293 5.54196   2 
  -4   6   0 41.6457 5.30424   2 
   3  -6   0 54.3151 7.31587   2 
   3  -6   0 59.4557 5.83380   2 
   3  -6   0 57.5074 5.81845   1 
  -3   6   0 52.2073 5.85197   2 
  -3   6   0 58.2288 6.02316   2 
  -3   6   0 63.1310 4.64196   1 
   2  -6   0 7.03575 3.10046   2 
   2  -6   0 2.60273 4.49741   2 
   2  -6   0 6.07274 2.68650   1 
  -2   6   0 8.31129 2.76644   2 
  -2   6   0 8.22653 2.88166   2 
  -2   6   0 4.48740 1.87758   1 
   1  -6   0 41.3517 4.53262   2 
  -1   6   0 36.8454 4.20858   2 
  -1   6   0 45.1967 4.49956   2 
   0  -6   0 163.916 8.24920   2 
   0   6   0 162.229 6.68664   2 
   0   6   0 169.227 6.94277   2 
  -1  -6   0 29.8326 4.95653   2 
   1   6   0 30.6375 3.54905   2 
   1   6   0 31.8451 3.65738   2 
  -2  -6   0 2.49974 4.90326   2 
  -2  -6   0 4.61149 2.76432   2 
   2   6   0 4.07473 3.75333   2 
   2   6   0 3.69773 3.30062   2 
  -3  -6   0 50.0920 5.49672   2 
  -3  -6   0 48.2493 7.52685   2 
   3   6   0 47.6282 5.50545   2 
  -4  -6   0 15.2684 4.17820   2 
   4   6   0 19.0364 5.37261   2 
   4   6   0 1.94577 5.59263   2 
  -5  -6   0 -5.2568 8.59639   2 
  -5  -6   0 -2.0959 5.06754   2 
   5   6   0 -0.8545 6.55981   2 
   5   6   0 8.51149 7.57521   2 
  -6  -6   0 7.89604 6.87540   2 
  -6  -6   0 27.6187 3.90506   1 
  -6  -6   0 36.6671 12.4218   2 
   6   6   0 31.8832 8.90033   2 
   6   6   0 10.3810 10.2377   2 
   4  -7   0 36.2401 11.5314   2 
   4  -7   0 13.0436 5.34966   1 
   4  -7   0 8.75236 5.17570   2 
  -4   7   0 7.10403 3.84177   1 
  -4   7   0 19.2510 5.72967   2 
  -4   7   0 18.1867 6.10110   2 
   3  -7   0 40.2255 8.64612   2 
   3  -7   0 31.0378 4.63279   1 
   3  -7   0 27.7941 5.16855   2 
  -3   7   0 23.5494 3.27866   1 
  -3   7   0 26.9208 4.75600   2 
  -3   7   0 31.9716 5.01015   2 
   2  -7   0 0.54116 5.91781   2 
   2  -7   0 2.71508 2.82128   1 
  -2   7   0 1.12508 3.43660   2 
  -2   7   0 3.85690 3.51380   2 
  -2   7   0 -4.5782 1.79413   1 
   1  -7   0 16.5222 5.10715   2 
   1  -7   0 26.0983 4.95110   2 
  -1   7   0 22.0912 3.65116   2 
  -1   7   0 18.6950 4.10767   2 
   0  -7   0 4.25606 5.06323   2 
   0  -7   0 1.50181 3.94069   2 
   0   7   0 2.13487 3.28574   2 
   0   7   0 0.85572 5.30758   2 
  -1  -7   0 36.1153 6.47211   2 
   1   7   0 50.3932 6.16526   2 
   1   7   0 56.6832 6.25520   2 
  -2  -7   0 32.6593 7.32146   2 
  -2  -7   0 24.3135 5.33329   2 
   2   7   0 27.4673 4.96104   2 
   2   7   0 26.4808 5.03034   2 
  -3  -7   0 36.1315 4.66889   2 
  -3  -7   0 43.1537 8.74638   2 
   3   7   0 35.0240 6.35980   2 
   3   7   0 26.4269 5.61520   2 
  -4  -7   0 22.8489 9.29313   2 
  -4  -7   0 -0.4307 4.39888   2 
   4   7   0 6.85256 6.38412   2 
  -5  -7   0 25.5441 6.42524   2 
  -5  -7   0 34.9553 11.9217   2 
   5   7   0 27.6557 8.47215   2 
   5   7   0 40.1036 9.69993   2 
  -6  -7   0 -19.928 15.2697   2 
  -6  -7   0 -11.738 7.37503   2 
   6   7   0 -18.833 11.2547   2 
   6   7   0 -0.4812 10.1206   2 
   2  -8   0 11.7852 7.01787   2 
   2  -8   0 24.5908 8.85750   2 
  -2   8   0 19.7311 5.05024   2 
  -2   8   0 20.8623 5.78282   2 
   1  -8   0 -5.5039 6.57117   2 
   1  -8   0 -18.597 6.14878   2 
  -1   8   0 0.96824 4.12699   2 
  -1   8   0 0.75148 4.84315   2 
   0  -8   0 1.19774 5.52770   2 
   0  -8   0 -5.4405 6.38531   2 
   0   8   0 7.14165 4.31889   2 
   0   8   0 0.75902 3.84465   2 
  -1  -8   0 16.3718 4.83248   2 
  -1  -8   0 27.6764 8.17135   2 
   1   8   0 16.2356 4.72218   2 
   1   8   0 20.1403 5.15443   2 
  -2  -8   0 -1.9896 8.02857   2 
   2   8   0 -3.4701 4.69206   2 
   2   8   0 2.15471 5.67878   2 
  -3  -8   0 43.1479 5.92623   2 
  -3  -8   0 43.3111 10.9036   2 
   3   8   0 27.9109 6.95172   2 
   3   8   0 47.4062 7.30976   2 
  -4  -8   0 0.88936 11.8710   2 
  -4  -8   0 -0.2118 5.87177   2 
   4   8   0 2.36770 7.34194   2 
   4   8   0 -3.4423 8.25329   2 
  -1  -9   0 42.8992 7.32602   2 
  -1  -9   0 37.5050 10.5308   2 
   1   9   0 41.5597 7.27990   2 
   1   9   0 41.8139 6.53508   2 
  -2  -9   0 111.867 10.3917   2 
  -2  -9   0 108.283 12.8098   2 
   2   9   0 118.711 11.6449   2 
   2   9   0 118.054 13.4349   2 
   4   8  -1 0.87476 7.87866   2 
   4   8  -1 8.28380 8.34962   2 
  -4  -8   1 9.32480 6.38016   2 
  -4  -8   1 1.08752 11.1742   2 
   3   8  -1 14.4540 6.66090   2 
   3   8  -1 17.9310 7.26343   2 
  -3  -8   1 30.8712 10.3029   2 
  -3  -8   1 -0.5626 4.23682   2 
   2   8  -1 15.1029 5.14918   2 
   2   8  -1 13.9692 6.17260   2 
  -2  -8   1 11.4811 7.97319   2 
  -2  -8   1 5.24425 4.69244   2 
   1   8  -1 1.81702 4.43319   2 
   1   8  -1 3.04080 4.74081   2 
  -1  -8   1 -2.3443 7.17186   2 
  -1  -8   1 2.59682 4.70430   2 
   0   8  -1 1.34347 4.48557   2 
   0   8  -1 3.16050 4.09340   2 
   0  -8   1 -1.3145 5.50670   2 
   0  -8   1 -0.3294 6.86639   2 
  -1   8  -1 -0.7838 3.87675   2 
  -1   8  -1 1.09094 5.01454   2 
   1  -8   1 -6.8986 6.41345   2 
   1  -8   1 2.47874 6.79120   2 
  -2   8  -1 185.436 9.78929   2 
  -2   8  -1 188.523 10.9255   2 
   2  -8   1 208.601 15.3348   2 
   5   7  -1 4.04971 9.11647   2 
   5   7  -1 -9.4023 8.19374   2 
  -5  -7   1 15.7328 11.5626   2 
  -5  -7   1 5.26781 5.85685   2 
   4   7  -1 2.26226 6.33413   2 
   4   7  -1 9.48182 6.85532   2 
  -4  -7   1 3.43752 4.50232   2 
  -4  -7   1 -3.3658 9.07049   2 
   3   7  -1 0.93494 5.50439   2 
   3   7  -1 6.55565 5.21858   2 
  -3  -7   1 6.57188 7.66628   2 
   2   7  -1 5.57603 4.47333   2 
   2   7  -1 6.41019 4.51431   2 
  -2  -7   1 8.39555 3.00243   2 
  -2  -7   1 10.5360 6.00181   2 
   1   7  -1 0.26985 3.51163   2 
   1   7  -1 -0.2395 3.38589   2 
  -1  -7   1 0.05391 3.37259   2 
  -1  -7   1 0.99497 5.60735   2 
   0   7  -1 14.8053 3.71808   2 
   0   7  -1 15.8852 3.36021   2 
   0  -7   1 12.5602 5.11209   2 
   0  -7   1 14.8912 3.95630   2 
  -1   7  -1 15.8608 3.92735   2 
  -1   7  -1 13.2172 3.05090   2 
   1  -7   1 8.71738 5.04944   2 
   1  -7   1 6.23961 4.80051   2 
  -2   7  -1 36.8594 4.41775   2 
  -2   7  -1 30.2187 4.37058   2 
   2  -7   1 28.5341 5.28118   2 
   2  -7   1 36.5971 6.75173   2 
   2  -7   1 32.3884 3.63595   1 
  -3   7  -1 2.81416 2.92542   1 
  -3   7  -1 3.21259 4.16667   2 
  -3   7  -1 15.2214 4.31395   2 
   3  -7   1 9.16442 3.88721   1 
   3  -7   1 9.76702 8.39536   2 
  -4   7  -1 54.1510 6.63739   1 
  -4   7  -1 50.5368 6.50098   2 
  -4   7  -1 63.7706 7.24951   2 
   4  -7   1 52.3280 6.45046   1 
   4  -7   1 45.7395 5.81156   2 
   4  -7   1 36.5958 11.4747   2 
   6   6  -1 10.7451 10.3207   2 
   6   6  -1 20.3526 9.40666   2 
  -6  -6   1 15.8083 7.20978   2 
  -6  -6   1 9.75787 13.1354   2 
   5   6  -1 0.43418 6.61651   2 
   5   6  -1 -0.1241 8.20304   2 
  -5  -6   1 -6.3928 4.91058   2 
  -5  -6   1 2.08787 9.22981   2 
   4   6  -1 11.8963 6.06303   2 
   4   6  -1 10.9225 5.54346   2 
  -4  -6   1 6.14103 4.00470   2 
  -4  -6   1 1.45475 7.31667   2 
   3   6  -1 41.1735 5.77334   2 
   3   6  -1 32.0139 5.28459   2 
  -3  -6   1 61.4076 9.67249   2 
  -3  -6   1 36.3743 4.07991   2 
   2   6  -1 3.70877 3.59790   2 
   2   6  -1 0.95242 3.40740   2 
  -2  -6   1 7.86608 5.52890   2 
   1   6  -1 3.83882 2.88368   2 
   1   6  -1 7.09809 3.04308   2 
  -1  -6   1 4.39354 4.19660   2 
  -1  -6   1 4.83021 2.53262   2 
   0   6  -1 11.8111 2.57246   2 
   0   6  -1 16.2221 3.16068   2 
   0  -6   1 11.3660 4.64527   2 
   0  -6   1 13.1894 3.02878   2 
  -1   6  -1 5.25505 2.36279   2 
  -1   6  -1 1.43363 2.66216   2 
   1  -6   1 8.00963 3.57840   2 
   1  -6   1 2.43061 3.59336   2 
  -2   6  -1 61.8058 5.06455   2 
  -2   6  -1 66.1299 3.92164   1 
  -2   6  -1 66.6200 5.41891   2 
   2  -6   1 64.4345 4.64229   1 
   2  -6   1 69.6418 8.16861   2 
  -3   6  -1 0.02853 2.46968   1 
  -3   6  -1 0.38140 3.15862   2 
  -3   6  -1 -1.7732 3.41341   2 
   3  -6   1 3.11444 6.15018   2 
   3  -6   1 5.95379 3.13462   1 
   3  -6   1 1.96187 3.11944   2 
  -4   6  -1 22.0513 4.97477   2 
  -4   6  -1 16.8282 4.98799   2 
  -4   6  -1 19.0222 3.91232   1 
   4  -6   1 18.2959 4.51293   1 
   4  -6   1 17.4420 8.75889   2 
   4  -6   1 19.9959 3.63163   2 
  -5   6  -1 4.74006 6.18250   2 
  -5   6  -1 9.33167 6.06719   2 
  -5   6  -1 9.92894 4.75211   1 
   5  -6   1 7.87116 4.40876   2 
   5  -6   1 -2.2528 11.6761   2 
   5  -6   1 3.16709 5.11211   1 
   7   5  -1 33.5521 7.13173   1 
   7   5  -1 35.1837 9.64976   2 
  -7  -5   1 39.6615 9.54982   2 
  -7  -5   1 63.6035 14.1847   2 
  -7  -5   1 40.4611 8.05244   1 
   6   5  -1 84.0880 9.47688   2 
   6   5  -1 94.9154 11.4469   2 
   6   5  -1 99.9098 7.47981   1 
  -6  -5   1 94.9617 12.3166   2 
  -6  -5   1 80.0960 8.33193   2 
  -6  -5   1 89.0126 6.06819   1 
   5   5  -1 10.1332 5.71105   2 
   5   5  -1 14.5530 2.92355   1 
   5   5  -1 20.9213 7.18106   2 
  -5  -5   1 14.8741 14.1882   2 
  -5  -5   1 14.7905 2.68956   1 
  -5  -5   1 8.33328 4.95008   2 
   4   5  -1 162.699 11.0771   2 
   4   5  -1 165.153 9.51594   2 
  -4  -5   1 159.244 8.23193   2 
  -4  -5   1 180.880 12.1033   2 
   3   5  -1 11.5636 4.02728   2 
   3   5  -1 21.6616 4.93177   2 
  -3  -5   1 10.4139 2.90414   2 
  -3  -5   1 15.5739 5.20559   2 
   2   5  -1 61.5041 5.53822   2 
   2   5  -1 71.5532 6.04964   2 
  -2  -5   1 63.9684 6.78985   2 
   1   5  -1 23.6120 3.26271   2 
   1   5  -1 24.9796 2.94527   2 
  -1  -5   1 20.0591 2.28072   2 
  -1  -5   1 16.3441 3.50398   2 
   0   5  -1 1.33797 1.86369   2 
   0   5  -1 1.99781 2.05145   2 
   0  -5   1 2.97298 2.13225   2 
   0  -5   1 0.50949 2.83490   2 
  -1   5  -1 96.5086 4.20295   2 
   1  -5   1 90.1748 5.44862   2 
  -2   5  -1 2.66648 2.56566   2 
  -2   5  -1 5.00191 1.97552   2 
  -2   5  -1 4.45564 1.85674   1 
   2  -5   1 5.82154 3.89221   2 
   2  -5   1 3.93791 2.03997   1 
   2  -5   1 0.70490 2.13256   2 
  -3   5  -1 -4.0590 2.40078   2 
  -3   5  -1 5.77168 2.50831   1 
  -3   5  -1 2.41514 2.97742   2 
   3  -5   1 1.58558 2.43701   1 
   3  -5   1 0.53968 2.05637   2 
   3  -5   1 3.85339 4.80907   2 
  -4   5  -1 104.737 6.13158   1 
  -4   5  -1 109.357 7.50829   2 
  -4   5  -1 93.9603 7.08855   2 
   4  -5   1 93.4929 5.42385   2 
   4  -5   1 80.8602 8.38190   2 
   4  -5   1 95.7588 6.73485   1 
  -5   5  -1 12.5334 5.63984   2 
  -5   5  -1 17.6488 4.28257   1 
  -5   5  -1 20.2003 5.56011   2 
   5  -5   1 16.5073 3.45136   2 
   5  -5   1 23.8591 9.56887   2 
   5  -5   1 18.5161 4.69539   1 
  -6   5  -1 0.84393 7.42706   2 
  -6   5  -1 8.68716 7.55371   2 
  -6   5  -1 7.93734 5.25407   1 
   6  -5   1 12.8799 12.9792   2 
   6  -5   1 5.49658 4.28648   2 
   6  -5   1 9.57456 6.19047   1 
   7   4  -1 -10.669 7.99749   2 
   7   4  -1 -5.0086 4.87642   1 
   7   4  -1 -8.9868 11.1678   2 
  -7  -4   1 10.5880 4.29303   1 
  -7  -4   1 7.29103 12.9108   2 
  -7  -4   1 15.9896 8.25674   2 
   6   4  -1 85.0658 10.3578   2 
   6   4  -1 84.9072 7.07105   1 
   6   4  -1 110.028 10.7363   2 
  -6  -4   1 90.7841 5.97260   1 
  -6  -4   1 94.0918 11.4734   2 
  -6  -4   1 112.265 10.6980   2 
   5   4  -1 209.146 13.6808   2 
   5   4  -1 245.030 8.24063   1 
   5   4  -1 242.909 11.3589   2 
  -5  -4   1 237.312 14.4596   2 
  -5  -4   1 233.972 10.9364   2 
  -5  -4   1 229.690 7.49551   1 
   4   4  -1 15.7185 5.02071   2 
   4   4  -1 7.98708 2.02807   1 
   4   4  -1 7.50182 3.90162   2 
  -4  -4   1 8.95860 3.69941   2 
  -4  -4   1 13.1658 1.94580   1 
  -4  -4   1 12.4597 5.57461   2 
   3   4  -1 196.151 7.99606   2 
   3   4  -1 198.713 8.89008   2 
  -3  -4   1 189.193 7.16868   2 
  -3  -4   1 193.378 9.60176   2 
   2   4  -1 94.3288 5.25289   2 
   2   4  -1 104.197 6.10076   2 
  -2  -4   1 99.2857 6.49463   2 
  -2  -4   1 90.4237 4.84405   2 
   1   4  -1 19.6714 2.28465   2 
  -1  -4   1 16.9464 3.08580   2 
   0   4  -1 117.838 4.41991   2 
   0   4  -1 110.649 4.70097   2 
   0  -4   1 124.910 5.38031   2 
   0  -4   1 122.608 4.26787   2 
  -1   4  -1 85.1299 3.46817   2 
  -1   4  -1 89.5658 3.12050   1 
  -1   4  -1 57.7018 5.31138   2 
   1  -4   1 88.6908 4.06376   2 
   1  -4   1 79.9327 4.41591   2 
   1  -4   1 83.5919 3.39023   1 
  -2   4  -1 19.6146 2.14378   2 
  -2   4  -1 19.4261 2.15947   1 
   2  -4   1 20.2116 3.49497   2 
   2  -4   1 22.1166 2.58726   2 
   2  -4   1 17.6152 2.35458   1 
  -3   4  -1 181.872 7.12218   2 
  -3   4  -1 183.454 6.72269   2 
  -3   4  -1 182.083 6.43964   1 
   3  -4   1 181.956 5.95708   2 
   3  -4   1 185.491 9.05580   2 
   3  -4   1 176.363 6.81899   1 
  -4   4  -1 6.93117 3.74687   2 
  -4   4  -1 12.3283 3.26290   2 
  -4   4  -1 18.8871 3.17841   1 
   4  -4   1 17.0859 3.60806   1 
   4  -4   1 18.6376 5.96002   2 
   4  -4   1 19.5065 2.37595   2 
  -5   4  -1 5.10304 3.53112   1 
  -5   4  -1 3.12290 3.74030   2 
  -5   4  -1 -0.7589 5.01160   2 
   5  -4   1 -1.3712 2.24047   2 
   5  -4   1 1.00606 3.49805   1 
   5  -4   1 12.6696 7.45803   2 
  -6   4  -1 36.1737 5.45259   1 
  -6   4  -1 35.2931 7.33555   2 
  -6   4  -1 27.0831 7.59164   2 
   6  -4   1 30.0285 11.0586   2 
   6  -4   1 38.8311 4.19961   2 
   6  -4   1 38.5622 5.55959   1 
   8   3  -1 7.03655 10.0643   2 
   8   3  -1 -6.3594 6.52529   1 
   8   3  -1 -20.731 14.1678   2 
  -8  -3   1 24.6567 11.2125   2 
  -8  -3   1 -2.5887 14.5721   2 
  -8  -3   1 5.49884 5.58883   1 
   7   3  -1 1.98851 10.5757   2 
   7   3  -1 -6.5420 6.94919   2 
   7   3  -1 -0.0145 4.64585   1 
  -7  -3   1 14.9211 11.1074   2 
  -7  -3   1 11.4885 8.16508   2 
  -7  -3   1 5.40050 3.85074   1 
   6   3  -1 -1.0817 7.70353   2 
   6   3  -1 1.27812 3.17860   1 
   6   3  -1 4.90265 5.34758   2 
  -6  -3   1 6.23496 5.81681   2 
  -6  -3   1 4.75836 3.18251   1 
  -6  -3   1 13.9403 7.76491   2 
   5   3  -1 15.9731 6.29205   2 
   5   3  -1 18.7711 2.83935   1 
   5   3  -1 20.4085 4.65183   2 
  -5  -3   1 18.5677 6.35568   2 
  -5  -3   1 17.0026 4.40783   2 
  -5  -3   1 14.2693 2.90072   1 
   4   3  -1 157.435 7.69744   2 
   4   3  -1 149.687 9.61082   2 
   4   3  -1 169.175 5.88838   1 
  -4  -3   1 174.654 7.63738   2 
  -4  -3   1 174.569 5.54081   1 
  -4  -3   1 169.006 10.0488   2 
   3   3  -1 112.435 3.94795   1 
   3   3  -1 106.542 7.01973   2 
   3   3  -1 107.541 5.76073   2 
  -3  -3   1 122.528 7.15363   2 
  -3  -3   1 113.886 5.65933   2 
  -3  -3   1 117.044 3.80848   1 
   2   3  -1 120.279 5.84579   2 
   2   3  -1 108.766 5.08789   2 
  -2  -3   1 122.613 6.33929   2 
  -2  -3   1 110.245 4.58717   2 
   1   3  -1 -0.6005 1.86786   2 
   1   3  -1 3.50215 1.45488   2 
  -1  -3   1 2.13211 2.14021   2 
   0   3  -1 1.27625 1.24549   2 
   0  -3   1 0.58614 1.73415   2 
   0  -3   1 2.27386 1.14400   2 
  -1   3  -1 719.679 16.0136   2 
  -1   3  -1 718.364 15.9338   2 
  -1   3  -1 709.389 15.7705   1 
   1  -3   1 742.408 16.2209   2 
   1  -3   1 702.985 16.3209   2 
   1  -3   1 709.528 15.9500   1 
  -2   3  -1 65.9843 3.17418   1 
  -2   3  -1 65.4466 3.07592   2 
   2  -3   1 55.7386 4.65491   2 
   2  -3   1 61.2112 3.33609   1 
   2  -3   1 61.0213 2.77377   2 
  -3   3  -1 196.634 7.27225   2 
  -3   3  -1 188.173 6.46348   2 
  -3   3  -1 193.928 6.36871   1 
   3  -3   1 194.687 8.33647   2 
   3  -3   1 197.902 6.73538   1 
   3  -3   1 196.598 5.77683   2 
  -4   3  -1 2.61598 3.46142   2 
  -4   3  -1 1.36262 1.97024   1 
  -4   3  -1 2.73317 2.57193   2 
   4  -3   1 0.31586 1.51251   2 
   4  -3   1 -0.0763 2.14156   1 
   4  -3   1 0.98028 4.75183   2 
  -5   3  -1 21.0107 5.28196   2 
  -5   3  -1 9.03199 4.16925   2 
  -5   3  -1 9.37479 3.47034   1 
   5  -3   1 6.09480 6.16999   2 
   5  -3   1 16.5936 2.67650   2 
   5  -3   1 10.3183 3.43723   1 
  -6   3  -1 28.7949 4.58605   1 
  -6   3  -1 36.0170 7.35172   2 
  -6   3  -1 37.0902 6.14267   2 
   6  -3   1 35.2801 4.98841   1 
   6  -3   1 7.62615 9.03852   2 
   6  -3   1 37.5485 3.97491   2 
  -7   3  -1 0.36784 5.41208   1 
  -7   3  -1 7.67707 8.22883   2 
  -7   3  -1 6.24679 9.28096   2 
   7  -3   1 4.85340 5.48097   1 
   7  -3   1 10.5711 13.2903   2 
   7  -3   1 10.5367 4.36439   2 
   8   2  -1 3.93856 6.06656   1 
   8   2  -1 9.26679 8.02647   2 
   8   2  -1 -5.0809 13.6407   2 
  -8  -2   1 8.35555 13.7503   2 
  -8  -2   1 12.5672 10.4907   2 
  -8  -2   1 7.85224 5.56748   1 
   7   2  -1 -9.0678 10.0389   2 
   7   2  -1 0.97046 6.22357   2 
   7   2  -1 -1.9686 4.19069   1 
  -7  -2   1 -6.2194 6.57777   2 
  -7  -2   1 0.69623 3.99945   1 
  -7  -2   1 3.63281 9.71716   2 
   6   2  -1 -5.6206 3.04360   1 
   6   2  -1 -6.6282 4.27458   2 
   6   2  -1 4.40619 7.59230   2 
  -6  -2   1 8.41614 6.99684   2 
  -6  -2   1 -0.9970 2.94430   1 
  -6  -2   1 0.41451 4.98068   2 
   5   2  -1 55.9551 6.63039   2 
   5   2  -1 62.2753 7.79761   2 
   5   2  -1 54.7287 4.57941   1 
  -5  -2   1 60.7711 7.08007   2 
  -5  -2   1 58.1284 4.32098   1 
  -5  -2   1 49.5247 5.27678   2 
   4   2  -1 164.800 7.25889   2 
   4   2  -1 151.769 5.71691   1 
   4   2  -1 157.619 9.41746   2 
  -4  -2   1 166.490 9.21265   2 
  -4  -2   1 167.410 5.52919   1 
  -4  -2   1 163.640 7.36834   2 
   3   2  -1 40.6517 3.94309   2 
   3   2  -1 38.0851 4.48026   2 
   3   2  -1 37.8789 2.73747   1 
  -3  -2   1 37.0793 2.44609   1 
  -3  -2   1 44.2108 4.55890   2 
  -3  -2   1 33.6541 4.11571   2 
   2   2  -1 20.3429 1.75708   1 
   2   2  -1 25.2632 2.89376   2 
   2   2  -1 25.2536 3.32584   2 
  -2  -2   1 23.8903 3.12463   2 
  -2  -2   1 26.3257 1.63335   1 
  -2  -2   1 30.0262 3.05761   2 
   1   2  -1 440.127 10.2633   2 
   1   2  -1 429.201 10.8114   2 
  -1  -2   1 427.673 10.9763   2 
   0   2  -1 11.2782 1.16500   2 
   0   2  -1 11.9340 1.44399   2 
   0  -2   1 12.1849 1.11281   2 
   0  -2   1 12.1896 1.68103   2 
  -1   2  -1 0.46859 0.77928   2 
  -1   2  -1 0.33443 0.78879   1 
  -1   2  -1 -0.5131 1.15354   2 
   1  -2   1 -0.3456 0.78219   2 
   1  -2   1 0.17418 1.34848   2 
   1  -2   1 0.61213 0.87130   1 
  -2   2  -1 15.2108 2.74350   2 
  -2   2  -1 14.5689 1.58738   1 
  -2   2  -1 17.1088 2.02380   2 
   2  -2   1 13.0778 2.57171   2 
   2  -2   1 15.7678 1.61007   2 
   2  -2   1 16.0441 1.74628   1 
  -3   2  -1 6.50772 1.81491   2 
  -3   2  -1 7.13652 2.54703   2 
  -3   2  -1 5.42181 1.57745   1 
   3  -2   1 6.12393 1.31040   2 
   3  -2   1 9.14390 1.93575   1 
   3  -2   1 2.16305 2.54624   2 
  -4   2  -1 26.4675 3.44138   2 
  -4   2  -1 27.7364 4.36221   2 
  -4   2  -1 27.8446 3.29113   1 
   4  -2   1 30.5815 3.44438   1 
   4  -2   1 28.5177 2.94030   2 
  -5   2  -1  9.9999 3.62252   2 
  -5   2  -1 8.49178 2.43872   1 
  -5   2  -1 10.4861 5.32493   2 
   5  -2   1 8.34294 2.31541   2 
   5  -2   1 4.11212 2.61072   1 
  -6   2  -1 26.6002 3.82939   1 
  -6   2  -1 30.7381 7.11507   2 
   6  -2   1 28.2244 3.92653   2 
   6  -2   1 37.6816 9.91380   2 
   6  -2   1 30.5647 4.15544   1 
  -7   2  -1 10.9457 7.73605   2 
  -7   2  -1 -2.7778 3.98441   1 
  -7   2  -1 2.72189 9.10819   2 
   7  -2   1 2.86884 4.21563   2 
   7  -2   1 5.91060 4.46332   1 
   7  -2   1 6.86059 12.0262   2 
   8   1  -1 -0.1412 15.0644   2 
   8   1  -1 17.5766 5.91171   1 
   8   1  -1 5.38780 7.06387   2 
  -8  -1   1 9.31865 12.9232   2 
  -8  -1   1 19.6968 5.51953   1 
   7   1  -1 43.8386 10.2973   2 
   7   1  -1 46.2796 5.53814   1 
   7   1  -1 45.2752 11.7066   2 
  -7  -1   1 59.1371 10.1456   2 
  -7  -1   1 56.1562 6.87693   1 
  -7  -1   1 51.6652 8.81632   2 
   6   1  -1 8.42200 8.16892   2 
   6   1  -1 2.39577 3.98821   2 
   6   1  -1 3.97648 3.36053   1 
  -6  -1   1 4.97890 5.06731   2 
  -6  -1   1 0.81436 3.04826   1 
  -6  -1   1 -2.4399 6.52536   2 
   5   1  -1 1.48338 3.28931   2 
   5   1  -1 0.23036 2.17406   1 
   5   1  -1 1.72552 5.59840   2 
  -5  -1   1 4.53555 3.51810   2 
  -5  -1   1 1.73234 2.09795   1 
  -5  -1   1 -3.1381 4.58695   2 
   4   1  -1 117.268 5.01898   1 
   4   1  -1 111.605 5.83068   2 
   4   1  -1 126.645 8.59305   2 
  -4  -1   1 113.658 6.37001   2 
  -4  -1   1 119.246 7.84909   2 
  -4  -1   1 123.973 4.64873   1 
   3   1  -1 61.4833 3.14119   1 
   3   1  -1 49.1842 5.82670   2 
   3   1  -1 58.9091 4.05575   2 
  -3  -1   1 58.6458 4.29116   2 
  -3  -1   1 60.8685 2.91760   1 
  -3  -1   1 62.7642 5.31086   2 
   2   1  -1 739.346 18.1915   2 
   2   1  -1 745.452 17.3942   2 
   2   1  -1 779.175 16.7594   1 
  -2  -1   1 769.248 17.4631   2 
  -2  -1   1 767.573 18.1308   2 
  -2  -1   1 767.689 16.6249   1 
   1   1  -1 276.702 6.82883   2 
   1   1  -1 280.979 6.19156   1 
   1   1  -1 276.841 7.48168   2 
  -1  -1   1 283.146 6.11887   1 
  -1  -1   1 271.407 7.35165   2 
   0   1  -1 13.8906 0.95033   2 
   0   1  -1 12.1103 1.44741   2 
   0  -1   1 13.4888 0.91052   2 
   0  -1   1 16.5944 1.26656   2 
  -1   1  -1 442.370 9.86374   2 
  -1   1  -1 446.020 10.2908   2 
  -1   1  -1 460.774 10.1950   1 
   1  -1   1 451.465 9.77337   2 
   1  -1   1 460.067 10.2153   1 
   1  -1   1 449.445 10.3762   2 
  -2   1  -1 15.5716 1.83561   1 
  -2   1  -1 11.4574 2.01062   2 
  -2   1  -1 15.2131 1.64441   2 
   2  -1   1 14.2673 1.57316   2 
   2  -1   1 13.7740 1.59794   1 
  -3   1  -1 23.9387 2.47979   1 
  -3   1  -1 22.5034 2.46164   2 
  -3   1  -1 25.2480 3.19545   2 
   3  -1   1 22.5113 2.35290   2 
   3  -1   1 27.0739 2.59090   1 
  -4   1  -1 126.925 5.26865   1 
  -4   1  -1 127.665 6.08876   2 
  -4   1  -1 145.646 7.50778   2 
   4  -1   1 130.668 5.12752   2 
   4  -1   1 120.332 8.52603   2 
   4  -1   1 132.256 5.41329   1 
  -5   1  -1 87.9061 4.89760   1 
  -5   1  -1 81.2063 6.55376   2 
  -5   1  -1 86.4114 8.77588   2 
   5  -1   1 74.1411 7.63951   2 
   5  -1   1 79.5104 5.14153   2 
   5  -1   1 71.0331 4.94491   1 
  -6   1  -1 1.45548 6.11912   2 
  -6   1  -1 2.87131 2.71796   1 
  -6   1  -1 1.46849 5.01577   2 
   6  -1   1 -0.5423 3.14301   2 
   6  -1   1 6.95602 7.66026   2 
   6  -1   1 4.10940 2.60061   1 
  -7   1  -1 -11.301 8.46592   2 
  -7   1  -1 -3.5228 3.38146   1 
  -7   1  -1 6.06487 7.12417   2 
   7  -1   1 -1.4077 4.01962   1 
   7  -1   1 -2.0447 10.5660   2 
   7  -1   1 -3.5864 4.62076   2 
   8   0  -1 33.9773 7.75379   2 
   8   0  -1 34.8175 16.5579   2 
   8   0  -1 41.0317 6.55091   1 
  -8   0   1 43.7588 6.29871   1 
  -8   0   1 31.8944 13.0330   2 
  -8   0   1 44.2450 10.7901   2 
   7   0  -1 6.87905 10.4860   2 
   7   0  -1 -1.9019 3.87938   1 
  -7   0   1 4.11295 3.70830   1 
  -7   0   1 11.7297 8.98451   2 
  -7   0   1 -0.5157 6.52479   2 
   6   0  -1 0.37441 3.94449   2 
   6   0  -1 6.94886 7.98081   2 
   6   0  -1 -1.8063 2.48398   1 
  -6   0   1 1.04111 5.09024   2 
  -6   0   1 1.88725 2.47380   1 
  -6   0   1 -0.1266 6.35936   2 
   5   0  -1 118.639 10.7408   2 
   5   0  -1 112.678 5.54657   1 
   5   0  -1 108.929 6.43414   2 
  -5   0   1 111.763 8.97477   2 
  -5   0   1 116.934 7.65163   2 
  -5   0   1 117.027 5.28021   1 
   4   0  -1 206.856 7.30129   2 
   4   0  -1 207.219 10.1872   2 
   4   0  -1 212.576 6.92469   1 
  -4   0   1 209.644 8.05133   2 
  -4   0   1 216.740 9.28186   2 
  -4   0   1 202.506 6.52125   1 
   3   0  -1 730.545 17.1183   2 
   3   0  -1 731.002 16.7899   1 
   3   0  -1 705.818 18.5189   2 
  -3   0   1 736.285 16.6198   1 
  -3   0   1 718.815 17.3657   2 
  -3   0   1 719.161 18.0715   2 
   2   0  -1 539.053 12.2041   1 
   2   0  -1 544.270 12.4974   2 
   2   0  -1 508.044 13.3047   2 
  -2   0   1 521.790 12.5822   2 
  -2   0   1 534.762 12.0535   1 
  -2   0   1 530.284 13.1827   2 
   1   0  -1 35.5572 2.63683   2 
   1   0  -1 38.4013 1.91872   2 
   1   0  -1 38.8688 1.59856   1 
  -1   0   1 37.5804 1.93234   2 
  -1   0   1 38.8833 2.51891   2 
  -1   0   1 37.4188 1.51989   1 
  -1   0  -1 10.4023 1.32575   2 
  -1   0  -1 10.6032 1.21257   1 
  -1   0  -1 8.99243 1.46229   2 
   1   0   1 10.5605 1.20002   1 
   1   0   1 9.93387 0.97442   2 
  -2   0  -1 3441.68 74.2450   2 
  -2   0  -1 3598.83 73.7293   1 
  -2   0  -1 3467.62 73.7488   2 
   2   0   1 3589.10 73.7604   1 
   2   0   1 3556.57 73.6532   2 
  -3   0  -1 5.53785 2.85170   2 
  -3   0  -1 6.18703 1.38900   1 
  -3   0  -1 3.80170 1.89947   2 
   3   0   1 9.70184 1.63669   2 
   3   0   1 4.89917 3.05770   2 
   3   0   1 6.78424 1.54226   1 
  -4   0  -1 54.4917 6.25115   2 
  -4   0  -1 58.4047 4.88028   2 
  -4   0  -1 44.4835 3.39415   1 
   4   0   1 47.2341 3.37430   1 
   4   0   1 53.1417 3.75252   2 
   4   0   1 46.7173 5.19277   2 
  -5   0  -1 22.5637 4.13611   2 
  -5   0  -1 22.3316 5.41761   2 
  -5   0  -1 16.3590 2.33511   1 
   5   0   1 21.8224 3.27437   2 
   5   0   1 17.9906 2.82408   1 
   5   0   1 15.4229 6.01269   2 
  -6   0  -1 11.7464 6.88153   2 
  -6   0  -1 -1.5719 4.69709   2 
  -6   0  -1 1.42414 2.49640   1 
   6   0   1 3.29323 3.49867   2 
   6   0   1 4.03749 2.60375   1 
   6   0   1 5.32140 7.62178   2 
  -7   0  -1 18.5808 9.08840   2 
  -7   0  -1 19.5039 3.99482   1 
   7   0   1 22.4517 4.79912   2 
   7   0   1 16.1272 4.10009   1 
   7   0   1 18.1869 10.2089   2 
  -8   0  -1 2.81666 5.13000   1 
  -8   0  -1 -8.0820 11.9739   2 
  -8   0  -1 11.2319 10.0838   2 
   8   0   1 -4.8515 5.48774   1 
   8   0   1 0.14497 6.67683   2 
   8   0   1 1.44181 14.7163   2 
   7  -1  -1 -2.6286 4.76716   2 
   7  -1  -1 12.9224 11.5566   2 
   7  -1  -1 8.44009 3.87134   1 
  -7   1   1 11.9876 8.99218   2 
  -7   1   1 3.19894 3.50529   1 
  -7   1   1 7.75983 7.13823   2 
   6  -1  -1 18.9348 3.69728   1 
   6  -1  -1 41.9041 9.78544   2 
   6  -1  -1 25.1656 4.48005   2 
  -6   1   1 24.0537 5.92372   2 
  -6   1   1 27.3143 3.68215   1 
  -6   1   1 25.7532 6.88364   2 
   5  -1  -1 3.23224 2.63128   2 
   5  -1  -1 6.52048 6.31723   2 
   5  -1  -1 5.48132 2.31207   1 
  -5   1   1 15.4283 4.80468   2 
  -5   1   1 12.6172 4.03928   2 
  -5   1   1 2.21194 2.05599   1 
   4  -1  -1 64.0396 7.81937   2 
   4  -1  -1 73.3536 4.20020   1 
   4  -1  -1 71.3283 4.34556   2 
  -4   1   1 77.5412 6.47737   2 
  -4   1   1 69.4030 3.84420   1 
  -4   1   1 73.9179 5.12459   2 
   3  -1  -1 65.6777 3.47123   2 
   3  -1  -1 68.4261 3.48920   1 
   3  -1  -1 70.1373 5.95386   2 
  -3   1   1 69.7649 4.95992   2 
  -3   1   1 62.7071 4.02144   2 
  -3   1   1 66.5289 3.24695   1 
   2  -1  -1 446.312 11.6926   2 
   2  -1  -1 443.450 10.6524   1 
   2  -1  -1 447.481 10.5531   2 
  -2   1   1 454.069 10.5287   1 
  -2   1   1 450.311 11.3953   2 
  -2   1   1 440.775 10.7903   2 
   1  -1  -1 2537.51 53.1751   1 
   1  -1  -1 2597.46 53.1530   2 
   1  -1  -1 2487.93 53.5562   2 
  -1   1   1 2593.98 53.2436   2 
  -1   1   1 2544.04 53.0877   1 
  -1   1   1 2586.63 53.4323   2 
   0  -1  -1 420.990 9.07671   2 
   0  -1  -1 408.828 8.74710   1 
   0  -1  -1 411.774 8.97178   2 
   0   1   1 415.791 8.74725   1 
   0   1   1 414.593 9.02094   2 
   0   1   1 425.336 8.98421   2 
  -1  -1  -1 469.786 10.9304   2 
  -1  -1  -1 463.643 10.3796   2 
  -1  -1  -1 444.119 10.1064   1 
   1   1   1 465.409 10.1652   1 
   1   1   1 462.243 10.4395   2 
   1   1   1 447.546 10.7181   2 
  -2  -1  -1 7655.50 158.566   2 
  -2  -1  -1 7679.20 158.800   1 
  -2  -1  -1 7438.73 158.272   2 
   2   1   1 7623.68 158.437   2 
   2   1   1 7753.28 158.917   2 
   2   1   1 7630.09 159.159   1 
  -3  -1  -1 14.8152 2.50474   2 
  -3  -1  -1 11.6499 3.29999   2 
  -3  -1  -1 12.4698 1.76929   1 
   3   1   1 13.3951 2.28803   2 
   3   1   1 12.9974 1.72906   1 
   3   1   1 11.0514 3.47116   2 
  -4  -1  -1 4463.71 91.8465   1 
  -4  -1  -1 4233.61 92.4661   2 
  -4  -1  -1 4343.45 93.5677   2 
   4   1   1 4356.72 91.9320   1 
   4   1   1 4410.22 92.3259   2 
   4   1   1 4333.62 93.7986   2 
  -5  -1  -1 13.1883 5.52778   2 
  -5  -1  -1 10.4964 3.65859   2 
  -5  -1  -1 7.87458 2.21958   1 
   5   1   1 0.93755 5.46470   2 
   5   1   1 9.86372 3.17432   2 
   5   1   1 6.49573 2.14019   1 
  -6  -1  -1 322.732 13.2422   1 
  -6  -1  -1 333.692 15.5596   2 
  -6  -1  -1 331.111 13.2241   2 
   6   1   1 313.920 16.2671   2 
   6   1   1 247.098 14.4956   1 
   6   1   1 343.502 11.9872   2 
  -7  -1  -1 57.1711 10.1264   2 
  -7  -1  -1 57.8564 8.43635   2 
  -7  -1  -1 65.8186 6.67387   1 
   7   1   1 52.6952 5.89843   1 
   7   1   1 55.2412 11.2406   2 
   7   1   1 61.0706 6.74220   2 
  -8  -1  -1 -0.4269 5.19566   1 
  -8  -1  -1 -6.2985 12.7875   2 
  -8  -1  -1 -14.374 9.57910   2 
   8   1   1 1.94342 6.87707   2 
   8   1   1 5.69919 6.01358   1 
   8   1   1 12.7950 14.0829   2 
   7  -2  -1 3.06753 4.62279   2 
   7  -2  -1 9.07962 12.6149   2 
   7  -2  -1 -4.2954 4.10307   1 
  -7   2   1 -5.3632 8.56493   2 
  -7   2   1 3.85685 7.36232   2 
  -7   2   1 6.84130 3.66078   1 
   6  -2  -1 12.9090 3.50112   2 
   6  -2  -1 7.91945 9.49841   2 
   6  -2  -1 8.32351 3.36909   1 
  -6   2   1 7.70640 6.48189   2 
  -6   2   1 4.43707 5.50113   2 
  -6   2   1 4.05960 2.81423   1 
   5  -2  -1 13.4715 2.77289   2 
   5  -2  -1 5.45893 6.21820   2 
   5  -2  -1 10.9647 2.60294   1 
  -5   2   1 10.0841 5.03698   2 
  -5   2   1 11.2902 3.63519   2 
  -5   2   1 9.62625 2.41279   1 
   4  -2  -1 3.38521 1.68243   1 
   4  -2  -1 2.29782 4.53688   2 
   4  -2  -1 5.68896 1.95551   2 
  -4   2   1 0.52807 3.53086   2 
  -4   2   1 2.31607 2.63334   2 
  -4   2   1 4.53706 1.69640   1 
   3  -2  -1 14.3935 3.72459   2 
   3  -2  -1 16.9129 2.09599   1 
   3  -2  -1 17.8564 1.94152   2 
  -3   2   1 16.2144 2.89701   2 
  -3   2   1 18.0042 2.25706   1 
  -3   2   1 14.6667 2.35785   2 
   2  -2  -1 13.7383 1.42443   2 
   2  -2  -1 14.3643 2.73319   2 
   2  -2  -1 11.9353 1.71016   1 
  -2   2   1 10.8838 1.47508   1 
  -2   2   1 13.1974 1.70355   2 
  -2   2   1 10.4431 2.10162   2 
   1  -2  -1 74.6606 3.58668   2 
   1  -2  -1 75.9027 2.71090   2 
   1  -2  -1 74.1029 2.70316   1 
  -1   2   1 74.5355 3.09243   2 
  -1   2   1 73.4540 2.75471   2 
  -1   2   1 79.7626 2.58601   1 
   0  -2  -1 24.7452 1.95317   2 
   0  -2  -1 24.4083 1.89626   2 
   0  -2  -1 24.1024 1.14266   1 
   0   2   1 25.3265 1.76991   2 
   0   2   1 26.7899 1.85223   2 
  -1  -2  -1 697.502 16.0070   2 
  -1  -2  -1 687.716 15.2037   2 
  -1  -2  -1 672.404 14.7257   1 
   1   2   1 680.780 15.8115   2 
   1   2   1 696.779 15.3397   2 
  -2  -2  -1 293.451 7.25487   1 
  -2  -2  -1 300.888 9.18145   2 
  -2  -2  -1 303.373 8.07686   2 
   2   2   1 298.917 8.85181   2 
   2   2   1 287.411 8.15382   2 
   2   2   1 297.224 7.30856   1 
  -3  -2  -1 2.74724 1.29398   1 
  -3  -2  -1 2.58915 2.24319   2 
  -3  -2  -1 2.32100 3.04888   2 
   3   2   1 -2.3881 2.90747   2 
   3   2   1 2.93283 2.09341   2 
   3   2   1 2.64505 1.23747   1 
  -4  -2  -1 924.997 23.8256   2 
  -4  -2  -1 891.377 21.8879   2 
  -4  -2  -1 884.801 20.7659   1 
   4   2   1 890.240 20.9278   1 
   4   2   1 907.641 22.0392   2 
   4   2   1 897.070 23.2824   2 
  -5  -2  -1 198.151 9.16055   2 
  -5  -2  -1 192.873 11.6295   2 
  -5  -2  -1 193.300 7.31960   1 
   5   2   1 198.259 8.93531   2 
   5   2   1 197.283 7.43382   1 
   5   2   1 210.894 11.3910   2 
  -6  -2  -1 957.939 27.6928   2 
  -6  -2  -1 957.832 23.1385   1 
  -6  -2  -1 909.125 24.9391   2 
   6   2   1 922.257 24.5223   2 
   6   2   1 935.479 23.5364   1 
   6   2   1 938.867 27.5956   2 
  -7  -2  -1 14.7454 7.25706   2 
  -7  -2  -1 10.8981 4.26309   1 
  -7  -2  -1 29.7706 9.92967   2 
   7   2   1 10.7244 4.51816   1 
   7   2   1 12.5020 6.53094   2 
   7   2   1 11.5151 10.5472   2 
  -8  -2  -1 106.936 9.88139   1 
  -8  -2  -1 100.769 12.2237   2 
  -8  -2  -1 112.115 15.3347   2 
   8   2   1 101.301 11.2162   1 
   8   2   1 124.033 13.8894   2 
   8   2   1 102.303 16.0297   2 
   7  -3  -1 -22.804 14.9377   2 
   7  -3  -1 1.82648 4.61622   2 
   7  -3  -1 -0.0934 5.29731   1 
  -7   3   1 1.48706 8.38399   2 
  -7   3   1 14.5048 9.38024   2 
  -7   3   1 1.22600 4.45651   1 
   6  -3  -1 -6.8882 10.3128   2 
   6  -3  -1 -0.7433 3.24489   2 
   6  -3  -1 1.59191 3.77832   1 
  -6   3   1 0.76882 3.37860   1 
  -6   3   1 -2.6766 6.29489   2 
  -6   3   1 3.70552 5.71956   2 
   5  -3  -1 4.81625 2.99731   1 
   5  -3  -1 0.45789 7.29144   2 
  -5   3   1 0.20361 2.55921   1 
  -5   3   1 2.31292 4.13486   2 
  -5   3   1 10.1666 4.94456   2 
   4  -3  -1 56.9964 3.78252   2 
   4  -3  -1 63.0401 6.81589   2 
   4  -3  -1 52.4323 4.45497   1 
  -4   3   1 46.4316 5.33692   2 
  -4   3   1 53.3854 3.89004   1 
  -4   3   1 53.4017 6.16258   2 
   3  -3  -1 271.253 10.2283   2 
   3  -3  -1 288.344 8.36464   1 
   3  -3  -1 266.303 7.54552   2 
  -3   3   1 283.990 8.84642   2 
  -3   3   1 280.310 8.47703   2 
  -3   3   1 275.905 7.80215   1 
   2  -3  -1 32.7045 2.31004   2 
   2  -3  -1 37.0110 3.64968   2 
   2  -3  -1 36.6674 2.86348   1 
  -2   3   1 33.5402 2.73964   2 
  -2   3   1 33.5847 3.18554   2 
  -2   3   1 37.7331 2.55244   1 
   1  -3  -1 136.092 4.29239   1 
   1  -3  -1 144.288 4.46552   2 
   1  -3  -1 144.608 5.11733   2 
  -1   3   1 141.340 4.54766   2 
  -1   3   1 138.482 3.93163   1 
  -1   3   1 139.590 4.41276   2 
   0  -3  -1 304.463 7.70818   2 
   0  -3  -1 301.397 6.98794   1 
   0  -3  -1 321.853 8.26140   2 
   0   3   1 300.908 7.62803   2 
   0   3   1 312.365 7.87129   2 
  -1  -3  -1 922.392 20.3631   2 
  -1  -3  -1 931.203 21.5562   2 
   1   3   1 925.133 20.6204   2 
  -2  -3  -1 32.8206 3.26783   2 
  -2  -3  -1 33.4287 1.93125   1 
  -2  -3  -1 28.5404 3.54152   2 
   2   3   1 28.0743 3.33895   2 
   2   3   1 37.6068 4.31465   2 
  -3  -3  -1 70.6109 6.78683   2 
  -3  -3  -1 62.4631 4.72202   2 
  -3  -3  -1 62.6782 3.13280   1 
   3   3   1 64.4725 4.70579   2 
   3   3   1 58.5056 5.93942   2 
   3   3   1 65.8414 3.13164   1 
  -4  -3  -1 11.0597 4.64549   2 
  -4  -3  -1 14.7058 3.56013   2 
  -4  -3  -1 8.49238 1.91884   1 
   4   3   1 10.4466 2.06814   1 
   4   3   1 9.51153 3.31222   2 
   4   3   1 10.4757 4.74317   2 
  -5  -3  -1 16.0956 6.43280   2 
  -5  -3  -1 7.11681 4.34515   2 
  -5  -3  -1 8.46650 2.52325   1 
   5   3   1 11.6785 5.68012   2 
   5   3   1 7.86243 2.44981   1 
   5   3   1 4.16839 4.04978   2 
  -6  -3  -1 69.7376 5.89495   1 
  -6  -3  -1 63.6012 9.68600   2 
  -6  -3  -1 61.8544 7.18380   2 
   6   3   1 59.6921 6.90605   2 
   6   3   1 48.0615 5.91339   1 
   6   3   1 52.6158 8.86820   2 
  -7  -3  -1 1.95864 10.8194   2 
  -7  -3  -1 6.91949 7.36820   2 
  -7  -3  -1 4.46207 4.34642   1 
   7   3   1 -2.9284 4.66425   1 
   7   3   1 -8.5980 6.13364   2 
   7   3   1 2.95806 9.56522   2 
  -8  -3  -1 372.579 27.1707   2 
  -8  -3  -1 324.183 26.6113   2 
  -8  -3  -1 331.516 14.0334   1 
   8   3   1 377.527 26.4163   2 
   8   3   1 377.041 19.6458   2 
   8   3   1 365.722 15.9419   1 
   6  -4  -1 434.388 15.3033   1 
   6  -4  -1 437.658 22.7425   2 
   6  -4  -1 438.176 13.3298   2 
  -6   4   1 430.553 17.3345   2 
  -6   4   1 444.091 13.8785   1 
  -6   4   1 440.944 17.3560   2 
   5  -4  -1 12.9730 3.07456   2 
   5  -4  -1 13.1415 8.38337   2 
   5  -4  -1 11.1595 3.55785   1 
  -5   4   1 9.41799 5.40456   2 
  -5   4   1 9.94675 4.80855   2 
  -5   4   1 9.26661 3.18711   1 
   4  -4  -1 26.5796 3.74892   1 
   4  -4  -1 24.6543 6.85229   2 
   4  -4  -1 31.1758 3.74800   2 
  -4   4   1 28.5767 4.56041   2 
  -4   4   1 24.4312 3.83487   2 
  -4   4   1 26.3544 3.33240   1 
   3  -4  -1 4.73407 1.72741   2 
   3  -4  -1 4.83294 2.25499   1 
   3  -4  -1 5.36125 4.45022   2 
  -3   4   1 1.42263 2.81479   2 
  -3   4   1 6.35138 2.38430   2 
  -3   4   1 2.90389 1.82721   1 
   2  -4  -1 2.17971 1.42720   2 
   2  -4  -1 0.83632 1.58158   1 
   2  -4  -1 1.77864 2.94817   2 
  -2   4   1 -0.8786 1.56395   2 
  -2   4   1 -0.1740 1.72643   2 
  -2   4   1 -0.3721 1.32949   1 
   1  -4  -1 272.554 7.28050   1 
   1  -4  -1 282.293 7.76592   2 
   1  -4  -1 273.953 8.18212   2 
  -1   4   1 273.615 6.69247   1 
  -1   4   1 279.435 7.53249   2 
  -1   4   1 280.857 7.54940   2 
   0  -4  -1 102.886 4.21012   2 
   0   4   1 103.020 4.15896   2 
   0   4   1 100.019 4.09344   2 
  -1  -4  -1 5.41951 1.69535   2 
  -1  -4  -1 3.31372 2.62318   2 
   1   4   1 3.69514 2.03830   2 
   1   4   1 3.49085 1.71699   2 
  -2  -4  -1 40.2829 4.90048   2 
  -2  -4  -1 32.0528 3.55186   2 
   2   4   1 33.3251 3.66000   2 
   2   4   1 36.2549 3.93185   2 
  -3  -4  -1 -1.0591 4.13477   2 
  -3  -4  -1 1.07679 1.36004   1 
  -3  -4  -1 -1.4838 2.34865   2 
   3   4   1 -0.3783 2.62314   2 
   3   4   1 0.12932 3.23909   2 
  -4  -4  -1 29.9992 5.86757   2 
  -4  -4  -1 26.9659 4.08081   2 
  -4  -4  -1 32.2846 3.28200   1 
   4   4   1 34.0170 5.44986   2 
   4   4   1 25.1286 2.61775   1 
   4   4   1 26.7261 4.42146   2 
  -5  -4  -1 30.3686 3.28723   1 
  -5  -4  -1 24.9549 7.92291   2 
  -5  -4  -1 26.1687 5.24025   2 
   5   4   1 28.4163 5.08846   2 
   5   4   1 24.1219 3.09688   1 
   5   4   1 33.7923 6.78379   2 
  -6  -4  -1 31.0221 3.99647   1 
  -6  -4  -1 30.6388 6.60182   2 
  -6  -4  -1 22.9488 9.46927   2 
   6   4   1 30.1010 4.33803   1 
   6   4   1 21.5250 6.47490   2 
   6   4   1 38.1654 8.23008   2 
  -7  -4  -1 2.41128 4.16044   1 
  -7  -4  -1 19.5873 10.9988   2 
  -7  -4  -1 15.3876 7.99815   2 
   7   4   1 -0.6966 4.81929   1 
   7   4   1 17.7546 10.4988   2 
   7   4   1 2.68755 10.3991   2 
   6  -5  -1 200.390 9.83159   2 
   6  -5  -1 202.514 12.2536   1 
  -6   5   1 189.457 15.1441   2 
  -6   5   1 216.538 14.5468   2 
  -6   5   1 203.205 10.4591   1 
   5  -5  -1 6.66983 4.25764   1 
   5  -5  -1 5.74946 3.45912   2 
  -5   5   1 7.52219 5.66489   2 
  -5   5   1 7.49937 5.20273   2 
  -5   5   1 0.25962 3.62715   1 
   4  -5  -1 1305.27 30.5042   2 
   4  -5  -1 1331.88 31.7236   1 
  -4   5   1 1327.26 32.5019   2 
  -4   5   1 1378.93 31.4893   2 
  -4   5   1 1346.84 30.4266   1 
   3  -5  -1 44.0488 4.22480   2 
   3  -5  -1 43.3895 4.78055   1 
  -3   5   1 36.4405 3.76368   1 
  -3   5   1 45.9250 4.16629   2 
  -3   5   1 44.3897 5.09212   2 
   2  -5  -1 108.162 4.98320   1 
   2  -5  -1 110.501 5.18409   2 
  -2   5   1 97.6607 5.21411   2 
  -2   5   1 99.5264 4.96760   2 
  -2   5   1 102.399 4.03248   1 
   1  -5  -1 257.006 9.61800   2 
   1  -5  -1 268.028 8.39012   2 
   1  -5  -1 260.557 7.18573   1 
  -1   5   1 255.851 6.37106   1 
  -1   5   1 259.854 7.70817   2 
  -1   5   1 253.527 7.67131   2 
   0  -5  -1 114.769 6.16993   2 
   0  -5  -1 111.198 5.09927   2 
   0   5   1 115.021 4.94604   2 
   0   5   1 106.045 4.70937   2 
  -1  -5  -1 29.4919 3.50483   2 
  -1  -5  -1 37.0952 4.40301   2 
   1   5   1 37.2830 3.78041   2 
   1   5   1 37.1624 4.13385   2 
  -2  -5  -1 66.6843 7.56689   2 
  -2  -5  -1 64.1580 4.62479   2 
   2   5   1 63.6666 4.97346   2 
  -3  -5  -1 29.9289 5.38941   2 
  -3  -5  -1 33.5740 3.61429   2 
   3   5   1 29.4627 4.60433   2 
   3   5   1 35.3244 4.54189   2 
  -4  -5  -1 5.54320 5.67874   2 
  -4  -5  -1 2.24438 3.36964   2 
  -4  -5  -1 5.57085 2.01362   1 
   4   5   1 2.81645 4.06421   2 
   4   5   1 15.4316 5.54235   2 
  -5  -5  -1 43.8167 8.50481   2 
  -5  -5  -1 40.8388 5.56417   2 
  -5  -5  -1 45.4937 4.65986   1 
   5   5   1 45.3131 7.57207   2 
   5   5   1 38.2720 6.19878   2 
  -6  -5  -1 -4.2378 10.0645   2 
  -6  -5  -1 6.47597 3.41350   1 
  -6  -5  -1 -6.5667 6.08535   2 
   6   5   1 7.60151 8.23497   2 
   6   5   1 -1.6121 3.62935   1 
   6   5   1 -2.8436 6.58303   2 
  -7  -5  -1 1.55697 13.6627   2 
  -7  -5  -1 1.31203 8.26581   2 
  -7  -5  -1 -1.9731 4.66773   1 
   7   5   1 25.4611 11.8047   2 
   7   5   1 4.40858 5.17110   1 
   7   5   1 1.70253 9.63957   2 
   5  -6  -1 -5.1754 5.32674   1 
   5  -6  -1 3.14335 11.5649   2 
   5  -6  -1 -1.1746 4.10707   2 
  -5   6   1 -2.7827 4.04422   1 
  -5   6   1 5.27358 6.01927   2 
  -5   6   1 11.7257 6.28915   2 
   4  -6  -1 148.710 8.78950   1 
   4  -6  -1 159.186 8.20040   2 
  -4   6   1 159.052 9.50382   2 
  -4   6   1 157.648 9.02084   2 
  -4   6   1 154.275 7.15800   1 
   3  -6  -1 8.69350 3.34383   2 
   3  -6  -1 2.28171 3.05372   1 
  -3   6   1 1.07972 2.35134   1 
  -3   6   1 3.61386 3.48296   2 
  -3   6   1 5.09059 3.52945   2 
   2  -6  -1 956.485 23.1220   2 
   2  -6  -1 941.263 22.2706   1 
  -2   6   1 952.488 21.0209   1 
  -2   6   1 956.107 22.4765   2 
  -2   6   1 930.395 22.5678   2 
  -1   6   1 73.5999 2.83649   1 
  -1   6   1 64.6606 5.10624   2 
  -1   6   1 71.1988 4.71833   2 
   0  -6  -1 21.2096 3.62255   2 
   0  -6  -1 23.9576 4.19178   2 
   0   6   1 22.1463 3.30531   2 
   0   6   1 19.4722 3.03222   2 
  -1  -6  -1 6.08794 2.76383   2 
  -1  -6  -1 5.23297 4.40573   2 
   1   6   1 4.10874 2.97329   2 
   1   6   1 4.74104 2.75616   2 
  -2  -6  -1 47.2497 6.63748   2 
  -2  -6  -1 44.3798 4.79081   2 
   2   6   1 38.0264 4.79906   2 
   2   6   1 36.2947 4.34752   2 
  -3  -6  -1 29.0184 3.92049   2 
  -3  -6  -1 29.6105 6.79907   2 
   3   6   1 32.2464 4.76613   2 
  -4  -6  -1 7.26293 7.79663   2 
  -4  -6  -1 2.00740 3.94240   2 
   4   6   1 2.37274 5.77109   2 
   4   6   1 5.86946 5.04909   2 
  -5  -6  -1 -1.7427 5.24325   2 
  -5  -6  -1 10.5890 17.5104   2 
   5   6   1 -3.7459 6.27563   2 
   5   6   1 0.56849 7.50502   2 
  -6  -6  -1 58.1575 7.83658   2 
  -6  -6  -1 66.6913 6.47947   1 
  -6  -6  -1 64.8900 13.9822   2 
   6   6   1 74.5550 9.76659   2 
   6   6   1 89.3986 11.3365   2 
  -7  -6  -1 -3.0545 8.95670   2 
  -7  -6  -1 -24.669 15.9062   2 
  -7  -6  -1 3.41134 5.51961   1 
   7   6   1 -9.7471 10.4396   2 
   7   6   1 3.73044 13.9256   2 
   4  -7  -1 12.6192 5.27001   2 
   4  -7  -1 2.70762 5.26412   1 
   4  -7  -1 17.6739 11.5987   2 
  -4   7   1 14.6253 5.93279   2 
  -4   7   1 11.1711 5.91520   2 
  -4   7   1 10.7496 3.70530   1 
   3  -7  -1 44.4233 5.58584   2 
   3  -7  -1 39.8091 8.47427   2 
   3  -7  -1 42.9130 5.15698   1 
  -3   7   1 38.1147 3.32560   1 
  -3   7   1 34.3037 5.16729   2 
  -3   7   1 39.8671 4.92016   2 
   2  -7  -1 3.90315 4.18626   2 
   2  -7  -1 4.29093 3.08265   1 
   2  -7  -1 1.02587 5.55896   2 
  -2   7   1 -0.9686 1.67869   1 
  -2   7   1 -1.2296 3.50021   2 
  -2   7   1 2.64514 3.49271   2 
   1  -7  -1 7.16330 4.92893   2 
  -1   7   1 18.5667 5.73881   2 
  -1   7   1 15.0977 3.69146   2 
   0  -7  -1 265.903 12.1129   2 
   0   7   1 266.235 9.46537   2 
   0   7   1 271.541 9.93854   2 
  -1  -7  -1 37.9199 6.71012   2 
  -1  -7  -1 42.0415 4.60235   2 
   1   7   1 43.0696 4.60740   2 
   1   7   1 39.7567 4.65543   2 
  -2  -7  -1 -1.9224 3.48029   2 
  -2  -7  -1 12.8973 6.97835   2 
   2   7   1 -2.2599 4.11025   2 
   2   7   1 3.67567 4.10373   2 
  -3  -7  -1 -6.7311 7.28657   2 
  -3  -7  -1 -0.7628 4.02679   2 
   3   7   1 -0.0775 4.77695   2 
   3   7   1 0.78151 5.14178   2 
  -4  -7  -1 9.07048 4.56243   2 
  -4  -7  -1 6.97204 9.73457   2 
   4   7   1 4.85727 6.41883   2 
  -5  -7  -1 -0.3625 5.67710   2 
  -5  -7  -1 -1.8615 10.9284   2 
   5   7   1 13.0453 10.5820   2 
   5   7   1 25.3344 8.43161   2 
  -6  -7  -1 2.33018 14.9349   2 
  -6  -7  -1 -1.4220 7.51636   2 
   6   7   1 7.84738 10.8666   2 
   6   7   1 4.43984 9.94588   2 
  -3   8   1 -1.7933 5.71790   2 
   2  -8  -1 7.16470 8.28866   2 
  -2   8   1 4.52124 5.29037   2 
  -2   8   1 1.50867 2.18820   1 
  -2   8   1 0.43059 4.13049   2 
   1  -8  -1 123.589 11.5488   2 
   1  -8  -1 78.7026 7.96138   2 
  -1   8   1 95.6469 8.45111   2 
  -1   8   1 96.8296 7.89561   2 
   0  -8  -1 48.0342 7.98197   2 
   0   8   1 43.3666 5.31792   2 
   0   8   1 44.4415 5.34538   2 
  -1  -8  -1 9.00760 7.46676   2 
   1   8   1 5.03647 4.65171   2 
   1   8   1 -0.0698 4.05629   2 
  -2  -8  -1 104.308 8.22186   2 
  -2  -8  -1 95.7845 11.0619   2 
   2   8   1 94.4543 8.72820   2 
   2   8   1 106.532 9.83020   2 
  -3  -8  -1 31.4773 10.3416   2 
  -3  -8  -1 33.6277 5.83426   2 
   3   8   1 26.9152 7.01970   2 
   3   8   1 31.5405 6.57199   2 
  -4  -8  -1 -1.3185 5.95305   2 
  -4  -8  -1 31.5667 12.4155   2 
   4   8   1 -2.7594 8.12873   2 
   4   8   1 -0.8278 7.67720   2 
  -5  -8  -1 36.1535 7.70875   2 
  -5  -8  -1 39.5717 14.1817   2 
   5   8   1 50.8164 9.80670   2 
   0  -9  -1 6.27124 9.61701   2 
   0  -9  -1 -4.2259 7.14657   2 
   0   9   1 6.65021 5.24774   2 
   0   9   1 12.0731 6.07541   2 
  -1  -9  -1 10.3834 8.00293   2 
  -1  -9  -1 55.0114 11.6642   2 
   1   9   1 50.4389 6.70523   2 
   1   9   1 43.0892 7.57144   2 
  -2  -9  -1 36.5410 8.61854   2 
  -2  -9  -1 40.6593 12.3479   2 
   2   9   1 46.7899 7.36204   2 
   2   9   1 35.6806 8.11706   2 
  -3  -9  -1 -10.747 12.6901   2 
   3   9   1 12.8516 7.35490   2 
   4   8  -2 3.84100 8.12616   2 
  -4  -8   2 -17.143 10.8949   2 
  -4  -8   2 1.72067 5.15608   2 
   3   8  -2 4.84254 7.64759   2 
   3   8  -2 20.1213 6.89212   2 
  -3  -8   2 12.4425 4.83040   2 
  -3  -8   2 8.00359 9.80849   2 
   2   8  -2 -5.2725 6.10177   2 
   2   8  -2 0.55864 5.22340   2 
  -2  -8   2 9.72574 7.97636   2 
  -2  -8   2 -5.7979 4.57190   2 
   1   8  -2 17.2817 5.48639   2 
   1   8  -2 11.0720 4.38976   2 
  -1  -8   2 10.4088 7.08230   2 
  -1  -8   2 12.7833 5.12274   2 
   0   8  -2 20.3866 9.82443   2 
   0   8  -2 29.8682 4.85216   2 
   0  -8   2 38.9342 7.25153   2 
   0  -8   2 11.8677 5.89156   2 
  -1   8  -2 -1.3810 5.43641   2 
  -1   8  -2 -2.9483 3.91375   2 
   1  -8   2 -0.8946 6.87726   2 
   1  -8   2 -3.7057 6.66786   2 
  -2   8  -2 14.7407 4.98639   2 
  -2   8  -2 21.2108 6.66172   2 
   2  -8   2 14.6159 8.68757   2 
   2  -8   2 23.2267 7.11067   2 
   5   7  -2 -6.5258 8.45209   2 
   5   7  -2 -3.2521 9.38364   2 
  -5  -7   2 -12.274 11.8751   2 
  -5  -7   2 6.49412 6.04892   2 
   4   7  -2 6.43643 7.17431   2 
   4   7  -2 9.70276 7.32207   2 
  -4  -7   2 -4.8646 8.38366   2 
   3   7  -2 13.3832 6.10526   2 
  -3  -7   2 17.4337 7.16837   2 
  -3  -7   2 19.0778 3.81384   2 
   2   7  -2 -2.1801 4.85997   2 
   2   7  -2 10.1178 4.74065   2 
  -2  -7   2 7.16318 3.39300   2 
  -2  -7   2 -0.1830 5.95247   2 
   1   7  -2 125.608 7.57645   2 
   1   7  -2 116.405 7.07522   2 
  -1  -7   2 117.822 6.72647   2 
  -1  -7   2 130.252 9.68268   2 
   0   7  -2 11.0980 4.32364   2 
   0   7  -2 14.2765 3.36393   2 
   0  -7   2 8.18091 4.41088   2 
   0  -7   2 13.4565 5.62787   2 
  -1   7  -2 8.42480 4.34244   2 
  -1   7  -2 3.53750 2.77892   2 
   1  -7   2 0.61468 5.35387   2 
   1  -7   2 11.1062 5.23260   2 
  -2   7  -2 19.9863 4.59899   2 
   2  -7   2 14.1686 6.59482   2 
   2  -7   2 13.3099 5.20951   2 
  -3   7  -2 17.6173 3.63251   1 
  -3   7  -2 11.8713 4.45977   2 
  -3   7  -2 14.3089 5.39477   2 
   3  -7   2 17.8232 8.97271   2 
   3  -7   2 15.4368 3.99288   1 
   6   6  -2 4.82283 8.95141   2 
   6   6  -2 12.4713 10.8237   2 
  -6  -6   2 -2.9120 6.95648   2 
  -6  -6   2 8.85553 12.8862   2 
   5   6  -2 23.5359 9.09287   2 
   5   6  -2 20.1892 7.41232   2 
  -5  -6   2 34.0538 10.2848   2 
  -5  -6   2 22.2741 5.55820   2 
   4   6  -2 8.10086 5.18513   2 
  -4  -6   2 8.99636 4.03454   2 
  -4  -6   2 13.8064 7.63760   2 
   3   6  -2 -0.7164 4.85271   2 
   3   6  -2 3.89212 4.87989   2 
  -3  -6   2 7.39490 6.00350   2 
  -3  -6   2 -4.3704 4.57322   2 
   2   6  -2 33.6318 4.74312   2 
  -2  -6   2 36.0764 4.39525   2 
  -2  -6   2 40.9920 5.76360   2 
   1   6  -2 35.4253 3.97948   2 
   1   6  -2 39.5979 4.05342   2 
  -1  -6   2 28.7485 3.24151   2 
  -1  -6   2 41.8490 5.08487   2 
   0   6  -2 1.08838 2.21742   2 
   0   6  -2 5.57149 3.18679   2 
   0  -6   2 2.80035 2.90008   2 
   0  -6   2 -0.1594 3.70566   2 
  -1   6  -2 88.7793 5.94542   2 
   1  -6   2 65.7132 6.49909   2 
   1  -6   2 79.0668 6.44456   2 
  -2   6  -2 23.9998 3.69087   2 
  -2   6  -2 25.1971 3.17004   2 
  -2   6  -2 22.2614 2.62498   1 
   2  -6   2 24.3309 3.06220   1 
   2  -6   2 22.6397 5.35378   2 
  -3   6  -2 3.83986 3.13014   2 
  -3   6  -2 12.6887 2.99855   1 
  -3   6  -2 4.38887 4.09893   2 
   3  -6   2 9.95890 6.57626   2 
   3  -6   2 4.20480 3.18446   1 
   3  -6   2 7.59043 3.61957   2 
  -4   6  -2 39.0794 4.44198   1 
  -4   6  -2 40.4311 5.71772   2 
  -4   6  -2 32.6706 5.42236   2 
   4  -6   2 43.4222 8.97416   2 
   4  -6   2 33.5869 5.04866   1 
   4  -6   2 35.5520 4.54189   2 
  -5   6  -2 19.0002 6.73289   2 
   5  -6   2 7.70440 4.15112   2 
   7   5  -2 21.9133 7.10547   1 
   7   5  -2 23.0799 13.1154   2 
   7   5  -2 6.44389 9.79300   2 
  -7  -5   2 5.87308 6.55987   1 
  -7  -5   2 2.97853 9.12538   2 
  -7  -5   2 8.39806 14.5697   2 
   6   5  -2 22.7566 4.13293   1 
   6   5  -2 12.7632 7.49720   2 
   6   5  -2 20.4615 15.7714   2 
  -6  -5   2 8.13175 6.52675   2 
  -6  -5   2 13.1037 3.03828   1 
  -6  -5   2 13.9675 10.4781   2 
   5   5  -2 155.188 13.1721   2 
   5   5  -2 156.965 10.8012   2 
  -5  -5   2 128.463 9.38663   2 
  -5  -5   2 140.343 14.6001   2 
   4   5  -2 110.129 8.45886   2 
   4   5  -2 126.530 10.0642   2 
  -4  -5   2 110.564 7.29937   2 
  -4  -5   2 114.488 11.6244   2 
   3   5  -2 75.5261 6.78950   2 
   3   5  -2 91.1656 7.91715   2 
  -3  -5   2 82.4047 8.45810   2 
   2   5  -2 14.3658 3.71977   2 
   2   5  -2 6.07060 3.04511   2 
  -2  -5   2 6.33732 2.33223   2 
  -2  -5   2 6.89437 4.13738   2 
   1   5  -2 61.7240 4.88146   2 
  -1  -5   2 69.6252 5.93866   2 
  -1  -5   2 67.4096 3.79952   2 
   0   5  -2 11.8045 2.08442   2 
   0   5  -2 9.98818 2.50355   2 
   0  -5   2 10.3660 3.06961   2 
   0  -5   2 10.2297 2.22203   2 
  -1   5  -2 7.83632 2.20482   2 
  -1   5  -2 6.03216 1.74905   2 
   1  -5   2 6.41310 2.97944   2 
   1  -5   2 9.32028 2.87651   2 
  -2   5  -2 12.3874 2.16293   2 
  -2   5  -2 11.5479 2.16305   1 
  -2   5  -2 8.25886 2.87417   2 
   2  -5   2 9.23232 2.32811   1 
   2  -5   2 8.94231 4.03173   2 
  -3   5  -2 80.1417 6.04581   2 
  -3   5  -2 59.2524 7.29880   2 
  -3   5  -2 81.0654 5.02148   1 
   3  -5   2 75.3792 5.29378   1 
   3  -5   2 86.7198 5.02842   2 
   3  -5   2 78.4419 8.57381   2 
  -4   5  -2 29.5574 4.07829   1 
  -4   5  -2 31.3540 4.40908   2 
  -4   5  -2 30.7288 5.08228   2 
   4  -5   2 25.7588 7.49174   2 
   4  -5   2 28.7550 3.49910   2 
   4  -5   2 32.5687 4.42251   1 
  -5   5  -2 1.69698 3.94776   1 
  -5   5  -2 4.14738 5.47531   2 
  -5   5  -2 7.52049 5.12928   2 
   5  -5   2 3.55057 4.45599   1 
   5  -5   2 4.69693 2.92759   2 
   5  -5   2 3.72700 8.90859   2 
   7   4  -2 12.4346 11.5829   2 
   7   4  -2 8.34147 5.18995   1 
   7   4  -2 -0.7771 8.34898   2 
  -7  -4   2 7.93017 4.40382   1 
  -7  -4   2 21.1940 8.48686   2 
  -7  -4   2 0.76934 11.5862   2 
   6   4  -2 22.9484 4.25454   1 
   6   4  -2 28.4532 9.06226   2 
   6   4  -2 27.3640 6.76838   2 
  -6  -4   2 28.4042 3.62033   1 
  -6  -4   2 35.1946 6.69051   2 
  -6  -4   2 46.4577 9.52367   2 
   5   4  -2 13.1605 7.20917   2 
   5   4  -2 17.3956 3.22875   1 
   5   4  -2 16.6635 5.25890   2 
  -5  -4   2 15.9625 2.68929   1 
  -5  -4   2 16.0013 5.13924   2 
  -5  -4   2 17.3818 6.88871   2 
   4   4  -2 143.519 9.87890   2 
   4   4  -2 139.921 8.13385   2 
   4   4  -2 137.936 5.24906   1 
  -4  -4   2 123.166 7.49630   2 
  -4  -4   2 145.615 10.5968   2 
  -4  -4   2 133.537 4.53694   1 
   3   4  -2 394.428 11.8810   2 
   3   4  -2 380.294 12.8693   2 
  -3  -4   2 379.188 10.8919   2 
  -3  -4   2 385.102 13.0393   2 
   2   4  -2 287.662 9.93379   2 
   2   4  -2 278.114 8.96565   2 
  -2  -4   2 305.962 10.4413   2 
  -1  -4   2 328.800 8.33470   2 
  -1  -4   2 336.490 10.1864   2 
   0   4  -2 27.6373 2.90582   2 
   0   4  -2 27.7815 2.67696   2 
   0  -4   2 31.4365 2.67500   2 
   0  -4   2 30.6396 3.18264   2 
  -1   4  -2 68.3928 2.86071   1 
  -1   4  -2 61.4280 3.46871   2 
  -1   4  -2 67.4819 3.14795   2 
   1  -4   2 65.2909 4.12896   2 
   1  -4   2 66.7131 3.06717   1 
  -2   4  -2 43.2524 3.00736   2 
  -2   4  -2 43.4659 3.77970   2 
  -2   4  -2 50.4832 3.14675   1 
   2  -4   2 48.1652 3.36985   1 
   2  -4   2 43.0596 3.29774   2 
   2  -4   2 43.0479 4.02464   2 
  -3   4  -2 90.3594 4.74281   1 
  -3   4  -2 89.6440 4.66283   2 
  -3   4  -2 75.6056 5.78154   2 
   3  -4   2 90.3064 7.33790   2 
   3  -4   2 91.1441 5.15169   1 
   3  -4   2 83.2901 4.12737   2 
  -4   4  -2 8.04621 2.96793   1 
  -4   4  -2 3.32284 4.65759   2 
  -4   4  -2 3.96775 3.23560   2 
   4  -4   2 6.40397 1.96947   2 
   4  -4   2 9.88832 5.67043   2 
   4  -4   2 10.5177 3.18833   1 
  -5   4  -2 -0.6440 5.14937   2 
  -5   4  -2 1.32440 3.39567   1 
  -5   4  -2 -1.6999 3.93197   2 
   5  -4   2 -2.0652 2.23652   2 
   5  -4   2 3.40930 7.61113   2 
   5  -4   2 6.03137 3.90805   1 
  -6   4  -2 29.7942 5.36627   1 
  -6   4  -2 40.7163 7.18819   2 
  -6   4  -2 19.7151 7.82199   2 
   6  -4   2 25.5973 5.72681   1 
   6  -4   2 33.3230 11.7535   2 
   6  -4   2 23.1062 3.54193   2 
   7   3  -2 3.92802 11.7393   2 
   7   3  -2 -12.337 7.02889   2 
   7   3  -2 1.71474 4.44050   1 
  -7  -3   2 0.02968 8.14126   2 
  -7  -3   2 4.96175 10.6180   2 
  -7  -3   2 2.63226 4.00707   1 
   6   3  -2 32.2711 8.76954   2 
   6   3  -2 29.8924 6.23946   2 
   6   3  -2 32.1197 4.30367   1 
  -6  -3   2 32.2568 3.80976   1 
  -6  -3   2 46.8763 9.31077   2 
  -6  -3   2 38.0769 6.66563   2 
   5   3  -2 4.23598 2.48462   1 
   5   3  -2 -0.1866 5.78997   2 
   5   3  -2 2.36670 4.16272   2 
  -5  -3   2 16.7360 6.27223   2 
  -5  -3   2 10.9587 4.40580   2 
  -5  -3   2 2.63995 2.27491   1 
   4   3  -2 21.7639 2.59373   1 
   4   3  -2 20.8636 3.77739   2 
   4   3  -2 20.0023 5.49610   2 
  -4  -3   2 33.6367 3.94461   2 
  -4  -3   2 24.7764 5.38058   2 
  -4  -3   2 27.3547 2.85516   1 
   3   3  -2 49.2990 2.82439   1 
   3   3  -2 47.4734 4.64886   2 
   3   3  -2 51.5674 5.09094   2 
  -3  -3   2 50.4796 4.58676   2 
  -3  -3   2 53.1294 5.17073   2 
  -3  -3   2 49.3805 2.44777   1 
   2   3  -2 177.378 6.47765   2 
   2   3  -2 178.877 7.36391   2 
  -2  -3   2 178.487 6.99692   2 
   1   3  -2 1525.24 33.3179   2 
   1   3  -2 1440.91 33.3582   2 
  -1  -3   2 1566.46 32.1920   2 
  -1  -3   2 1510.19 33.4777   2 
   0   3  -2 1062.88 23.3208   2 
   0   3  -2 1078.14 23.0276   2 
   0  -3   2 1075.90 23.7906   2 
   0  -3   2 1048.94 22.8216   2 
  -1   3  -2 1595.16 33.7848   2 
  -1   3  -2 1599.89 33.8193   1 
  -1   3  -2 1605.88 33.7908   2 
   1  -3   2 1599.67 33.9523   1 
   1  -3   2 1556.53 34.1178   2 
  -2   3  -2 25.2946 2.31986   2 
  -2   3  -2 32.7526 2.66483   1 
  -2   3  -2 27.2289 2.53100   2 
   2  -3   2 24.7836 2.73154   1 
   2  -3   2 23.6815 2.24097   2 
   2  -3   2 25.6005 3.03013   2 
  -3   3  -2 70.2173 3.98486   2 
  -3   3  -2 71.9563 5.55068   2 
  -3   3  -2 69.9186 4.04929   1 
   3  -3   2 70.2456 3.17659   2 
   3  -3   2 74.1909 6.33854   2 
   3  -3   2 74.5096 4.31565   1 
  -4   3  -2 4.69795 2.15835   1 
  -4   3  -2 3.23709 4.35818   2 
  -4   3  -2 0.49690 2.58993   2 
   4  -3   2 -0.4347 4.61547   2 
   4  -3   2 -1.4195 2.09373   1 
   4  -3   2 -1.0319 1.38605   2 
  -5   3  -2 103.437 6.08323   1 
  -5   3  -2 107.734 9.18948   2 
   5  -3   2 112.023 11.3890   2 
   5  -3   2 96.0359 6.65243   1 
   5  -3   2 105.323 4.68754   2 
  -6   3  -2 17.4270 6.98921   2 
  -6   3  -2 14.8624 4.18142   1 
  -6   3  -2 13.3848 5.58186   2 
   6  -3   2 5.62886 9.49298   2 
   6  -3   2 16.8068 4.27335   1 
   6  -3   2 20.9199 3.13599   2 
  -7   3  -2 7.88909 9.66717   2 
  -7   3  -2 9.69179 5.41496   1 
  -7   3  -2 4.05386 7.73436   2 
   7  -3   2 -4.8498 5.55592   1 
   7  -3   2 11.6934 12.7081   2 
   7  -3   2 2.84373 3.67235   2 
   8   2  -2 8.84809 8.37043   2 
   8   2  -2 -2.5838 14.9591   2 
   8   2  -2 15.7895 6.41954   1 
  -8  -2   2 17.2467 14.2897   2 
  -8  -2   2 1.74245 5.68944   1 
  -8  -2   2 -0.7914 10.8280   2 
   7   2  -2 75.3376 12.1373   2 
   7   2  -2 67.3514 6.67746   1 
   7   2  -2 72.1356 8.63332   2 
  -7  -2   2 80.7548 8.84584   2 
  -7  -2   2 81.0023 6.94990   1 
  -7  -2   2 78.6314 11.6202   2 
   6   2  -2 20.5691 3.67526   1 
   6   2  -2 24.1697 8.91216   2 
   6   2  -2 21.2162 5.45827   2 
  -6  -2   2 22.7481 7.68973   2 
  -6  -2   2 31.5178 3.71803   1 
  -6  -2   2 16.9989 5.82952   2 
   5   2  -2 0.41988 6.31521   2 
   5   2  -2 3.78991 2.45968   1 
   5   2  -2 10.0187 3.92825   2 
  -5  -2   2 12.6939 2.42202   1 
  -5  -2   2 7.79992 5.50530   2 
  -5  -2   2 3.48582 4.29374   2 
   4   2  -2 16.9234 2.39009   1 
   4   2  -2 14.3333 3.41761   2 
   4   2  -2 21.9225 5.26028   2 
  -4  -2   2 23.3289 4.51366   2 
  -4  -2   2 19.6329 2.24434   1 
  -4  -2   2 14.3972 3.44168   2 
   3   2  -2 65.1056 4.60506   2 
   3   2  -2 65.4989 3.13217   1 
   3   2  -2 59.3520 6.50924   2 
  -3  -2   2 62.8733 5.60566   2 
  -3  -2   2 66.6097 4.59474   2 
  -3  -2   2 68.0703 2.85593   1 
   2   2  -2 4.81019 1.86383   2 
   2   2  -2 2.53670 2.68432   2 
   2   2  -2 3.41415 1.08561   1 
  -2  -2   2 2.20169 2.35250   2 
  -2  -2   2 3.41081 0.83991   1 
   1   2  -2 72.4160 4.13886   2 
   1   2  -2 69.7232 3.75021   2 
  -1  -2   2 80.3025 4.10032   2 
  -1  -2   2 77.5394 2.84017   2 
   0   2  -2 361.729 8.16296   2 
   0  -2   2 364.594 8.84237   2 
   0  -2   2 356.488 8.02691   2 
  -1   2  -2 181.702 4.55518   2 
  -1   2  -2 175.650 4.85428   2 
  -1   2  -2 179.103 4.90987   1 
   1  -2   2 186.900 4.71038   2 
   1  -2   2 187.692 5.00156   1 
  -2   2  -2 253.223 6.92803   1 
  -2   2  -2 255.887 7.35310   2 
  -2   2  -2 254.421 6.62776   2 
   2  -2   2 254.978 6.19600   2 
   2  -2   2 248.334 7.64860   2 
   2  -2   2 258.241 7.11683   1 
  -3   2  -2 56.6001 3.53343   2 
  -3   2  -2 56.3687 3.38947   1 
  -3   2  -2 53.7698 5.08449   2 
   3  -2   2 61.2937 5.22445   2 
   3  -2   2 55.8102 2.64495   2 
   3  -2   2 57.3344 3.54932   1 
  -4   2  -2 0.89273 3.68614   2 
  -4   2  -2 3.12961 2.80052   2 
  -4   2  -2 2.85278 1.96450   1 
   4  -2   2 1.53735 4.02601   2 
   4  -2   2 4.92839 1.59597   2 
   4  -2   2 3.37177 2.01389   1 
  -5   2  -2 194.952 7.63459   1 
  -5   2  -2 202.714 8.91970   2 
  -5   2  -2 210.641 10.5748   2 
   5  -2   2 203.061 12.1093   2 
   5  -2   2 196.316 8.09598   1 
  -6   2  -2 19.2411 5.43546   2 
  -6   2  -2 18.2979 3.71555   1 
  -6   2  -2 28.3662 6.78080   2 
   6  -2   2 14.8642 3.87344   1 
   6  -2   2 18.8979 8.18095   2 
   6  -2   2 17.0703 3.25048   2 
  -7   2  -2 4.53852 8.93734   2 
  -7   2  -2 -3.5519 4.16725   1 
  -7   2  -2 0.52039 7.29128   2 
   7  -2   2 2.33582 4.51124   1 
   7  -2   2 -5.9037 10.3625   2 
   7  -2   2 5.99481 3.82813   2 
   8   1  -2 12.0309 7.50249   2 
   8   1  -2 7.61090 6.69089   1 
   8   1  -2 4.12408 15.6357   2 
  -8  -1   2 11.2629 5.58948   1 
  -8  -1   2 6.56442 10.3785   2 
  -8  -1   2 8.61233 12.6575   2 
   7   1  -2 7.69423 11.0251   2 
   7   1  -2 19.2535 5.19744   1 
   7   1  -2 10.7083 5.85839   2 
  -7  -1   2 18.9886 10.0442   2 
  -7  -1   2 13.7521 4.04495   1 
  -7  -1   2 6.00070 7.38962   2 
   6   1  -2 -1.1818 7.32688   2 
   6   1  -2 -1.6520 5.36952   1 
   6   1  -2 -3.8414 4.09852   2 
  -6  -1   2 0.63482 4.05884   1 
  -6  -1   2 8.01618 6.57400   2 
  -6  -1   2 5.22251 5.06995   2 
   5   1  -2 53.9468 6.35913   2 
   5   1  -2 52.3669 7.36213   2 
   5   1  -2 53.4578 4.67449   1 
  -5  -1   2 60.8770 6.90439   2 
  -5  -1   2 62.0730 6.90909   2 
  -5  -1   2 58.8550 4.13814   1 
   4   1  -2 -2.5928 3.97401   2 
   4   1  -2 2.80371 1.55445   1 
   4   1  -2 -0.0606 2.63292   2 
  -4  -1   2 2.73743 1.65020   1 
  -4  -1   2 4.60015 2.95780   2 
  -4  -1   2 3.54369 3.70932   2 
   3   1  -2 180.813 5.52741   1 
   3   1  -2 180.209 6.53845   2 
   3   1  -2 176.613 8.18445   2 
  -3  -1   2 184.329 7.68952   2 
  -3  -1   2 167.031 6.57879   2 
  -3  -1   2 179.008 5.18500   1 
   2   1  -2 56.9071 4.57444   2 
   2   1  -2 54.0702 2.38229   1 
   2   1  -2 52.1478 3.31286   2 
  -2  -1   2 52.5686 2.21973   1 
  -2  -1   2 58.0697 4.07316   2 
  -2  -1   2 54.1281 3.45151   2 
   1   1  -2 2.94309 0.62359   1 
   1   1  -2 2.78367 1.82869   2 
  -1  -1   2 2.97192 1.67679   2 
  -1  -1   2 1.43835 0.92279   2 
  -1  -1   2 2.29994 0.48958   1 
  -1   1  -2 66.0482 2.49385   1 
   1  -1   2 68.8410 2.58773   1 
  -2   1  -2 108.589 4.73912   2 
  -2   1  -2 114.396 3.94410   1 
  -2   1  -2 111.260 3.71204   2 
   2  -1   2 113.099 3.93409   1 
   2  -1   2 104.760 4.80495   2 
   2  -1   2 108.156 3.21776   2 
  -3   1  -2 368.230 9.72775   1 
  -3   1  -2 371.649 10.7919   2 
  -3   1  -2 351.619 9.69578   2 
   3  -1   2 375.374 11.0920   2 
   3  -1   2 373.971 9.85956   1 
   3  -1   2 369.572 9.11645   2 
  -4   1  -2 52.9679 4.54693   2 
  -4   1  -2 47.5637 3.53969   1 
  -4   1  -2 55.9454 6.33337   2 
   4  -1   2 52.2380 3.76835   1 
   4  -1   2 53.1474 3.43136   2 
  -5   1  -2 39.2841 5.69190   2 
  -5   1  -2 37.9860 4.49248   2 
  -5   1  -2 42.1993 4.14349   1 
   5  -1   2 44.7709 4.39742   2 
   5  -1   2 38.7118 3.90792   1 
  -6   1  -2 6.94980 2.96768   1 
  -6   1  -2 7.16248 6.93740   2 
  -6   1  -2 13.3380 5.36076   2 
   6  -1   2 7.17620 3.34585   2 
   6  -1   2 8.58041 3.19685   1 
  -7   1  -2 14.2315 7.42437   2 
  -7   1  -2 22.2091 4.34833   1 
  -7   1  -2 18.7186 8.94158   2 
   7  -1   2 14.4162 4.23271   1 
   7  -1   2 10.3182 11.6129   2 
   7  -1   2 16.1138 4.70437   2 
   8   0  -2 70.1205 8.71840   2 
   8   0  -2 71.8745 8.18602   1 
   8   0  -2 76.3118 17.6502   2 
  -8   0   2 76.0111 11.8477   2 
  -8   0   2 74.0056 9.13746   1 
  -8   0   2 82.9502 14.5151   2 
   7   0  -2 0.62561 10.7695   2 
   7   0  -2 5.54584 4.98025   2 
   7   0  -2 3.65425 3.66811   1 
  -7   0   2 11.6854 9.02036   2 
  -7   0   2 -1.1734 6.77833   2 
  -7   0   2 3.76020 3.57712   1 
   6   0  -2 10.2274 8.23290   2 
   6   0  -2 7.21023 3.12893   1 
   6   0  -2 15.3967 4.27987   2 
  -6   0   2 13.3926 5.52831   2 
  -6   0   2 17.5219 3.10762   1 
  -6   0   2 15.5827 6.77000   2 
   5   0  -2 94.3582 5.24558   1 
   5   0  -2 97.3362 6.30031   2 
   5   0  -2 91.9292 10.9090   2 
  -5   0   2 98.7681 7.46797   2 
  -5   0   2 96.4368 9.18119   2 
  -5   0   2 98.9447 4.86616   1 
   4   0  -2 52.1949 4.33960   2 
   4   0  -2 51.0078 5.95490   2 
   4   0  -2 54.3928 3.58046   1 
  -4   0   2 47.9299 3.33843   1 
  -4   0   2 51.5672 5.41296   2 
  -4   0   2 52.0194 6.27344   2 
   3   0  -2 75.0754 6.50839   2 
   3   0  -2 85.6694 4.23577   2 
   3   0  -2 85.2022 3.75762   1 
  -3   0   2 85.0893 3.41415   1 
  -3   0   2 84.4735 4.68227   2 
  -3   0   2 94.9345 5.55043   2 
   2   0  -2 360.790 8.62482   1 
   2   0  -2 346.296 10.0880   2 
   2   0  -2 367.058 9.12445   2 
  -2   0   2 362.741 8.46763   1 
  -2   0   2 354.222 9.19905   2 
  -2   0   2 355.793 9.72025   2 
   1   0  -2 414.790 10.1626   2 
   1   0  -2 437.640 9.36169   1 
   1   0  -2 425.657 9.71344   2 
  -1   0   2 414.969 9.96920   2 
  -1   0   2 433.319 9.26194   1 
   0   0  -2 535.165 11.4773   1 
   0   0   2 544.502 11.5558   1 
  -1   0  -2 629.405 13.9041   1 
  -1   0  -2 630.744 13.5415   2 
  -1   0  -2 625.738 13.8437   2 
   1   0   2 628.134 13.9205   1 
  -2   0  -2 296.314 7.56624   1 
  -2   0  -2 274.630 9.29109   2 
  -2   0  -2 301.301 7.58230   2 
   2   0   2 285.510 8.05391   2 
   2   0   2 294.855 7.59484   1 
   2   0   2 304.774 7.33507   2 
  -3   0  -2 56.5226 5.00998   2 
  -3   0  -2 51.8832 3.10324   1 
  -3   0  -2 58.7139 3.87334   2 
   3   0   2 55.1381 3.13594   2 
   3   0   2 55.0983 3.15329   1 
  -4   0  -2 13.7841 2.01911   1 
  -4   0  -2 14.4717 4.11099   2 
  -4   0  -2 15.1825 2.90421   2 
   4   0   2 15.9099 2.47069   1 
   4   0   2 11.8909 2.22938   2 
   4   0   2 14.8331 4.55002   2 
  -5   0  -2 1.85106 3.39169   2 
  -5   0  -2 1.18631 1.96514   1 
  -5   0  -2 -3.0278 4.83999   2 
   5   0   2 1.24013 5.16167   2 
   5   0   2 1.56079 2.44857   2 
   5   0   2 5.54355 2.29711   1 
  -6   0  -2 108.681 11.8035   2 
  -6   0  -2 93.3205 5.86940   1 
  -6   0  -2 89.1786 9.09312   2 
   6   0   2 89.5395 6.20015   1 
   6   0   2 91.8980 10.2553   2 
   6   0   2 89.4417 9.66848   2 
  -7   0  -2 11.6059 3.40259   1 
  -7   0  -2 18.5553 7.22029   2 
  -7   0  -2 10.6832 9.33505   2 
   7   0   2 4.11094 3.93382   1 
   7   0   2 2.31373 10.6977   2 
   7   0   2 21.1980 5.08027   2 
  -8   0  -2 -1.2865 5.13350   1 
  -8   0  -2 15.9178 9.79349   2 
  -8   0  -2 2.14520 12.5511   2 
   8   0   2 -4.7173 6.56840   2 
   8   0   2 3.76735 14.2278   2 
   8   0   2 -6.9300 5.29370   1 
   7  -1  -2 11.9694 12.5012   2 
   7  -1  -2 -2.5734 4.23467   1 
   7  -1  -2 -4.9161 4.66572   2 
  -7   1   2 9.06342 7.43653   2 
  -7   1   2 0.85953 8.71375   2 
  -7   1   2 9.06144 3.64718   1 
   6  -1  -2 14.8383 4.25157   2 
   6  -1  -2 12.4146 9.10294   2 
   6  -1  -2 18.2916 3.54044   1 
  -6   1   2 23.5871 6.97247   2 
  -6   1   2 19.3917 3.08628   1 
  -6   1   2 14.2225 5.45913   2 
   5  -1  -2 64.5491 5.60762   2 
   5  -1  -2 82.4799 8.27449   2 
   5  -1  -2 72.4217 5.07660   1 
  -5   1   2 71.6158 7.20185   2 
  -5   1   2 85.2175 8.69505   2 
  -5   1   2 80.9346 4.46571   1 
   4  -1  -2 106.957 8.50688   2 
   4  -1  -2 126.929 5.47448   2 
   4  -1  -2 121.200 5.20109   1 
  -4   1   2 123.859 7.45229   2 
  -4   1   2 123.731 4.75728   1 
  -4   1   2 120.688 6.20556   2 
   3  -1  -2 389.534 12.1906   2 
   3  -1  -2 415.069 10.4264   2 
   3  -1  -2 406.912 10.4083   1 
  -3   1   2 402.829 11.5886   2 
  -3   1   2 399.149 9.96905   1 
  -3   1   2 388.864 10.8221   2 
   2  -1  -2 185.434 5.32923   1 
   2  -1  -2 191.472 5.46936   2 
   2  -1  -2 187.841 6.67717   2 
  -2   1   2 194.936 6.27613   2 
  -2   1   2 185.502 5.68415   2 
  -2   1   2 193.213 5.19519   1 
   1  -1  -2 278.444 7.35190   2 
   1  -1  -2 283.932 6.64390   1 
   1  -1  -2 283.171 6.74167   2 
  -1   1   2 283.097 7.08991   2 
  -1   1   2 287.054 6.52579   1 
  -1   1   2 285.732 6.86697   2 
   0  -1  -2 815.825 17.1101   2 
   0  -1  -2 807.612 16.9438   1 
   0  -1  -2 797.901 17.1204   2 
   0   1   2 808.991 16.9908   1 
   0   1   2 809.602 17.0808   2 
  -1  -1  -2 149.374 4.20934   1 
  -1  -1  -2 156.726 4.25677   2 
  -1  -1  -2 157.515 4.75024   2 
   1   1   2 162.807 4.33414   2 
  -2  -1  -2 729.540 17.1730   2 
  -2  -1  -2 731.467 16.3635   2 
  -2  -1  -2 706.331 16.1163   1 
   2   1   2 730.368 16.3116   2 
   2   1   2 708.928 16.1873   1 
   2   1   2 697.280 17.0743   2 
  -3  -1  -2 29.7468 2.63348   1 
  -3  -1  -2 27.1434 3.68527   2 
  -3  -1  -2 31.8089 3.53619   2 
   3   1   2 33.1414 3.09680   2 
   3   1   2 28.6839 3.74704   2 
   3   1   2 28.7561 2.45044   1 
  -4  -1  -2 774.446 20.2599   2 
  -4  -1  -2 766.787 18.1643   1 
  -4  -1  -2 755.357 18.8888   2 
   4   1   2 766.302 18.4863   2 
   4   1   2 756.402 20.1429   2 
   4   1   2 729.393 18.2128   1 
  -5  -1  -2 27.7974 2.97001   1 
  -5  -1  -2 39.0135 5.96171   2 
  -5  -1  -2 33.5817 4.39745   2 
   5   1   2 32.1455 3.95789   2 
   5   1   2 25.2338 5.90329   2 
   5   1   2 32.6871 3.79661   1 
  -6  -1  -2 58.7251 6.89421   1 
  -6  -1  -2 80.6199 8.99699   2 
  -6  -1  -2 100.682 11.7960   2 
   6   1   2 90.8057 7.22160   2 
   6   1   2 77.2510 6.70931   1 
   6   1   2 86.6255 9.52151   2 
  -7  -1  -2 6.77927 3.88365   1 
  -7  -1  -2 8.12015 8.79088   2 
  -7  -1  -2 3.00474 9.12906   2 
   7   1   2 4.71435 4.01949   1 
   7   1   2 19.0170 9.73998   2 
   7   1   2 6.50791 5.15196   2 
  -8  -1  -2 8.96982 5.43646   1 
  -8  -1  -2 20.8680 12.8495   2 
  -8  -1  -2 -8.9689 9.35013   2 
   8   1   2 2.60950 6.49549   2 
   8   1   2 -2.2814 13.8806   2 
   8   1   2 -5.5252 5.33484   1 
   7  -2  -2 60.9369 6.48986   1 
   7  -2  -2 97.7783 15.3268   2 
   7  -2  -2 76.2525 8.66289   2 
  -7   2   2 61.7583 6.49178   1 
  -7   2   2 77.9168 10.3082   2 
  -7   2   2 60.7909 9.20922   2 
   6  -2  -2 30.0653 6.58883   2 
   6  -2  -2 27.8771 4.27562   1 
   6  -2  -2 29.1206 9.78632   2 
  -6   2   2 26.5543 3.67839   1 
  -6   2   2 23.4334 6.95458   2 
  -6   2   2 29.3768 6.24868   2 
   5  -2  -2 1.14771 6.76877   2 
   5  -2  -2 9.18548 2.63900   1 
   5  -2  -2 10.9854 2.84888   2 
  -5   2   2 13.1224 3.95107   2 
  -5   2   2 14.3010 4.87454   2 
  -5   2   2 11.9373 2.26215   1 
   4  -2  -2 34.0837 3.58312   1 
   4  -2  -2 37.3100 3.64240   2 
   4  -2  -2 33.9820 5.72303   2 
  -4   2   2 42.0929 4.67535   2 
  -4   2   2 29.7635 3.88370   2 
  -4   2   2 37.2598 3.22402   1 
   3  -2  -2 606.861 14.4496   2 
   3  -2  -2 585.236 16.3983   2 
   3  -2  -2 594.714 14.7681   1 
  -3   2   2 612.358 15.4974   2 
  -3   2   2 621.339 14.3651   1 
  -3   2   2 614.857 15.1274   2 
   2  -2  -2 5.07865 1.27817   2 
   2  -2  -2 3.54377 2.51393   2 
   2  -2  -2 3.10645 1.12365   1 
  -2   2   2 2.52793 1.85795   2 
  -2   2   2 3.62059 1.06248   1 
  -2   2   2 5.55562 1.43238   2 
   1  -2  -2 110.057 3.37870   1 
   1  -2  -2 109.977 3.41396   2 
   1  -2  -2 107.902 4.28679   2 
  -1   2   2 110.229 3.79581   2 
  -1   2   2 112.292 3.55031   2 
  -1   2   2 106.875 3.12858   1 
   0  -2  -2 37.7541 1.39727   1 
   0  -2  -2 35.9239 2.10192   2 
   0  -2  -2 39.3088 2.16481   2 
   0   2   2 37.3791 2.03583   2 
   0   2   2 37.0781 1.43142   1 
   0   2   2 37.3468 2.01738   2 
  -1  -2  -2 225.533 5.92353   2 
  -1  -2  -2 229.276 6.79217   2 
   1   2   2 224.219 5.98409   2 
  -2  -2  -2 867.897 19.3604   2 
  -2  -2  -2 863.499 20.3358   2 
  -2  -2  -2 865.564 18.9302   1 
   2   2   2 854.013 18.9433   1 
   2   2   2 820.296 19.9431   2 
   2   2   2 865.847 19.5295   2 
  -3  -2  -2 155.865 7.74501   2 
  -3  -2  -2 165.223 5.30599   1 
  -3  -2  -2 162.729 6.21023   2 
   3   2   2 162.652 7.39773   2 
   3   2   2 167.312 6.22038   2 
   3   2   2 163.824 5.33284   1 
  -4  -2  -2 2.15260 2.78112   2 
  -4  -2  -2 1.93261 1.57799   1 
  -4  -2  -2 -2.7490 3.90957   2 
   4   2   2 0.29619 2.71884   2 
   4   2   2 0.38705 1.43444   1 
   4   2   2 -0.0931 3.73529   2 
  -5  -2  -2 112.004 10.1790   2 
  -5  -2  -2 73.0778 7.31837   2 
  -5  -2  -2 83.1450 4.77917   1 
   5   2   2 84.4798 6.70213   2 
   5   2   2 72.9133 7.29214   2 
   5   2   2 75.9165 4.95125   1 
  -6  -2  -2 1045.02 29.4249   2 
  -6  -2  -2 1040.05 25.3005   1 
  -6  -2  -2 1020.72 27.0256   2 
   6   2   2 1059.11 25.7709   1 
   6   2   2 1027.39 26.4116   2 
   6   2   2 1033.19 29.3680   2 
  -7  -2  -2 0.58171 7.06996   2 
  -7  -2  -2 -1.1250 3.70505   1 
  -7  -2  -2 6.62424 10.0699   2 
   7   2   2 1.89352 9.80385   2 
   7   2   2 12.9393 5.98836   2 
   7   2   2 -2.3393 4.14388   1 
  -8  -2  -2 161.995 16.9220   2 
  -8  -2  -2 200.061 11.6661   1 
  -8  -2  -2 193.136 17.9551   2 
   8   2   2 208.647 23.2466   2 
   8   2   2 226.832 13.1360   1 
   8   2   2 208.252 14.5819   2 
   7  -3  -2 -4.0948 15.6837   2 
   7  -3  -2 12.6735 5.20814   2 
   7  -3  -2 6.98295 5.01437   1 
  -7   3   2 10.9363 9.02761   2 
  -7   3   2 7.25227 4.35199   1 
  -7   3   2 22.5174 9.81660   2 
   6  -3  -2 -1.6995 3.26854   1 
   6  -3  -2 7.54407 10.2893   2 
   6  -3  -2 2.66851 3.40876   2 
  -6   3   2 2.77447 6.77659   2 
  -6   3   2 0.32801 3.28293   1 
  -6   3   2 -0.4003 5.28849   2 
   5  -3  -2 23.8031 7.77446   2 
   5  -3  -2 10.2102 3.22605   1 
   5  -3  -2 11.4470 3.03265   2 
  -5   3   2 0.07133 4.24842   2 
  -5   3   2 15.1175 2.98308   1 
  -5   3   2 14.3497 5.17539   2 
   4  -3  -2 3.30119 2.17627   1 
   4  -3  -2 0.34220 1.84717   2 
   4  -3  -2 4.13860 5.32436   2 
  -4   3   2 0.61563 1.82980   1 
  -4   3   2 -1.6561 3.47735   2 
  -4   3   2 2.15131 2.84777   2 
   3  -3  -2 110.431 7.42124   2 
   3  -3  -2 110.551 4.31778   2 
   3  -3  -2 111.101 5.01644   1 
  -3   3   2 106.256 5.27595   2 
  -3   3   2 114.047 4.43428   1 
  -3   3   2 106.260 5.69971   2 
   2  -3  -2 42.3618 4.84836   2 
   2  -3  -2 44.0508 2.59381   2 
   2  -3  -2 42.8081 2.96568   1 
  -2   3   2 42.9154 3.49354   2 
  -2   3   2 42.0309 2.49188   1 
  -2   3   2 40.7693 3.02560   2 
   1  -3  -2 559.805 12.9644   2 
   1  -3  -2 545.743 13.3352   2 
   1  -3  -2 558.739 12.7012   1 
  -1   3   2 556.733 12.2931   1 
  -1   3   2 563.673 12.9549   2 
  -1   3   2 553.689 12.9019   2 
   0  -3  -2 456.342 10.0428   1 
   0  -3  -2 470.430 10.8105   2 
   0  -3  -2 458.743 11.1512   2 
   0   3   2 457.998 10.8207   2 
   0   3   2 451.264 9.92455   1 
   0   3   2 453.144 10.7299   2 
  -1  -3  -2 6.17146 2.24139   2 
  -1  -3  -2 5.82247 0.76068   1 
  -1  -3  -2 5.70254 1.41459   2 
   1   3   2 6.40337 1.51543   2 
   1   3   2 4.51979 1.78991   2 
  -2  -3  -2 1.95502 1.92697   2 
  -2  -3  -2 1.31145 0.99326   1 
  -2  -3  -2 -0.0016 2.68325   2 
   2   3   2 -2.0973 2.19410   2 
   2   3   2 -0.1105 1.65351   2 
  -3  -3  -2 45.0466 2.86011   1 
  -3  -3  -2 45.5198 5.00090   2 
  -3  -3  -2 40.0713 4.28704   2 
   3   3   2 44.8604 5.39486   2 
   3   3   2 43.2100 4.46965   2 
   3   3   2 40.6259 2.85228   1 
  -4  -3  -2 65.2259 4.03976   1 
  -4  -3  -2 58.7810 6.31260   2 
  -4  -3  -2 67.5428 5.66344   2 
   4   3   2 64.5967 5.52944   2 
   4   3   2 65.6073 3.98707   1 
   4   3   2 70.4691 7.31342   2 
  -5  -3  -2 3.57505 2.23358   1 
  -5  -3  -2 -0.2688 6.59105   2 
  -5  -3  -2 3.26089 4.00203   2 
   5   3   2 -1.2612 5.41020   2 
   5   3   2 3.98263 2.36871   1 
   5   3   2 1.87377 3.86407   2 
  -6  -3  -2 25.8348 3.88923   1 
  -6  -3  -2 26.2267 6.12309   2 
  -6  -3  -2 22.7362 9.07450   2 
   6   3   2 30.6788 4.21840   1 
   6   3   2 15.6396 7.80123   2 
   6   3   2 24.3924 5.36926   2 
  -7  -3  -2 19.0402 4.51614   1 
  -7  -3  -2 34.0452 7.80080   2 
  -7  -3  -2 29.5541 10.7872   2 
   7   3   2 16.6666 4.91792   1 
   7   3   2 3.98513 9.97379   2 
   7   3   2 13.8318 6.45663   2 
  -8  -3  -2 363.621 20.9975   2 
  -8  -3  -2 319.089 27.3575   2 
  -8  -3  -2 304.584 13.7991   1 
   8   3   2 273.527 26.1537   2 
   8   3   2 311.119 19.0529   2 
   8   3   2 313.904 15.3137   1 
   6  -4  -2 202.952 10.9989   1 
   6  -4  -2 216.135 9.18571   2 
   6  -4  -2 169.158 20.1339   2 
  -6   4   2 223.186 13.6687   2 
  -6   4   2 204.693 13.7375   2 
  -6   4   2 213.464 9.45098   1 
   5  -4  -2 3.71473 3.60704   1 
   5  -4  -2 6.92697 3.04803   2 
   5  -4  -2 4.15278 8.79891   2 
  -5   4   2 4.03833 3.01216   1 
  -5   4   2 10.9879 4.50450   2 
  -5   4   2 1.64448 5.12047   2 
   4  -4  -2 4.15935 2.61384   1 
   4  -4  -2 1.38119 2.05443   2 
   4  -4  -2 -4.3996 6.17105   2 
  -4   4   2 3.60773 3.29252   2 
  -4   4   2 -0.6044 2.38625   1 
  -4   4   2 0.05800 3.79936   2 
   3  -4  -2 51.2665 3.53620   2 
   3  -4  -2 55.5341 5.95507   2 
   3  -4  -2 52.5549 4.24029   1 
  -3   4   2 55.6014 4.63715   2 
  -3   4   2 52.3197 3.55266   1 
  -3   4   2 49.9745 4.97787   2 
   2  -4  -2 103.433 4.38630   2 
   2  -4  -2 94.2838 6.34132   2 
   2  -4  -2 102.058 4.52818   1 
  -2   4   2 104.644 4.59500   2 
  -2   4   2 101.428 3.79027   1 
  -2   4   2 99.1235 4.69222   2 
   1  -4  -2 0.74996 2.11695   2 
   1  -4  -2 1.86034 1.58171   2 
   1  -4  -2 1.71336 1.26531   1 
  -1   4   2 1.90307 1.48467   2 
  -1   4   2 2.12035 1.67576   2 
  -1   4   2 -0.8097 0.82684   1 
   0  -4  -2 404.610 9.37474   1 
   0  -4  -2 426.130 11.0233   2 
   0  -4  -2 402.992 10.2803   2 
   0   4   2 406.314 10.3467   2 
   0   4   2 420.052 9.12782   1 
   0   4   2 410.509 10.2595   2 
  -1  -4  -2 93.7583 5.68878   2 
  -1  -4  -2 95.7876 4.06471   2 
   1   4   2 102.068 4.35013   2 
   1   4   2 94.6636 4.54519   2 
  -2  -4  -2 -0.1278 1.54360   2 
  -2  -4  -2 -2.0264 3.08262   2 
  -2  -4  -2 1.55394 1.10598   1 
   2   4   2 4.08819 2.21225   2 
  -3  -4  -2 201.147 9.64993   2 
  -3  -4  -2 199.504 5.95556   1 
  -3  -4  -2 197.641 7.31839   2 
   3   4   2 200.101 8.87507   2 
   3   4   2 199.628 8.08939   2 
  -4  -4  -2 3.49988 5.26826   2 
  -4  -4  -2 2.11160 1.81396   1 
  -4  -4  -2 -1.2526 3.17581   2 
   4   4   2 0.62943 3.24046   2 
   4   4   2 3.04542 4.39865   2 
  -5  -4  -2 23.2992 6.86981   2 
  -5  -4  -2 18.5000 2.88000   1 
  -5  -4  -2 22.0960 5.13044   2 
   5   4   2 23.9902 6.13780   2 
   5   4   2 22.6433 3.15334   1 
   5   4   2 25.7164 5.18780   2 
  -6  -4  -2 46.9676 10.1098   2 
  -6  -4  -2 30.9094 4.30050   1 
  -6  -4  -2 36.7129 6.85319   2 
   6   4   2 42.8244 8.52518   2 
   6   4   2 29.8383 4.17046   1 
   6   4   2 34.8140 6.46497   2 
  -7  -4  -2 8.35395 12.5943   2 
  -7  -4  -2 21.1052 8.05412   2 
  -7  -4  -2 10.0255 4.69035   1 
   7   4   2 21.1052 10.3959   2 
   7   4   2 14.4650 4.90458   1 
   7   4   2 3.19896 7.67886   2 
   6  -5  -2 -10.321 14.4894   2 
   6  -5  -2 4.30072 6.15392   1 
   6  -5  -2 -0.5515 4.37545   2 
  -6   5   2 3.65707 4.64596   1 
  -6   5   2 10.8005 8.03329   2 
  -6   5   2 14.3558 7.77377   2 
   5  -5  -2 10.6690 3.74771   2 
   5  -5  -2 36.8678 10.8342   2 
   5  -5  -2 22.7837 4.96293   1 
  -5   5   2 18.6399 6.21584   2 
  -5   5   2 13.0985 5.27850   2 
  -5   5   2 11.0398 3.54450   1 
   4  -5  -2 617.182 21.1394   2 
   4  -5  -2 615.874 17.4339   1 
   4  -5  -2 615.728 16.0619   2 
  -4   5   2 618.557 15.7080   1 
  -4   5   2 594.827 17.3903   2 
  -4   5   2 626.235 17.0931   2 
   3  -5  -2 54.6874 4.57063   2 
   3  -5  -2 53.1566 6.81960   2 
   3  -5  -2 58.1171 5.00678   1 
  -3   5   2 51.9072 5.25418   2 
  -3   5   2 47.2433 5.15229   2 
  -3   5   2 50.7152 3.87579   1 
   2  -5  -2 219.981 7.19585   1 
   2  -5  -2 212.959 7.39891   2 
   2  -5  -2 205.856 9.43012   2 
  -2   5   2 216.055 7.39611   2 
  -2   5   2 213.395 6.09236   1 
  -2   5   2 211.321 7.29866   2 
   1  -5  -2 16.7033 2.05083   1 
   1  -5  -2 16.9517 2.78769   2 
   1  -5  -2 17.2173 3.16807   2 
  -1   5   2 16.1472 2.46512   2 
  -1   5   2 14.1469 1.36661   1 
  -1   5   2 15.3847 2.28291   2 
   0  -5  -2 33.1302 2.98719   2 
   0  -5  -2 33.1479 2.44632   1 
   0   5   2 29.7121 3.41987   2 
   0   5   2 36.1128 1.88248   1 
   0   5   2 34.9065 3.54558   2 
  -1  -5  -2 6.16318 3.23932   2 
  -1  -5  -2 6.00286 2.22032   2 
   1   5   2 8.73378 2.44770   2 
   1   5   2 10.7817 2.41587   2 
  -2  -5  -2 -2.2106 2.12935   2 
  -2  -5  -2 -4.7587 3.55906   2 
   2   5   2 -0.7767 2.71374   2 
   2   5   2 0.25028 2.45125   2 
  -3  -5  -2 14.7953 4.98875   2 
  -3  -5  -2 16.2367 3.18054   2 
   3   5   2 22.3189 4.57161   2 
   3   5   2 24.8440 3.88235   2 
  -4  -5  -2 7.98994 2.14829   1 
  -4  -5  -2 3.22095 3.65375   2 
  -4  -5  -2 15.4171 6.37698   2 
   4   5   2 15.2935 4.29779   2 
   4   5   2 4.99461 5.25596   2 
  -5  -5  -2 40.3224 8.59247   2 
  -5  -5  -2 36.2711 3.63935   1 
  -5  -5  -2 30.0605 5.38436   2 
   5   5   2 33.5307 7.33153   2 
   5   5   2 27.1079 5.75423   2 
  -6  -5  -2 29.2528 6.91756   2 
  -6  -5  -2 41.1272 4.54553   1 
  -6  -5  -2 39.9794 11.4829   2 
   6   5   2 34.1876 9.36605   2 
   6   5   2 35.7541 7.47019   2 
  -7  -5  -2 -2.7738 8.23499   2 
  -7  -5  -2 9.32121 5.00868   1 
   7   5   2 0.43069 8.47127   2 
   7   5   2 12.6756 11.3260   2 
   7   5   2 1.67370 4.90915   1 
   5  -6  -2 35.6518 5.47235   2 
   5  -6  -2 44.3964 6.68519   1 
   5  -6  -2 52.8207 13.5363   2 
  -5   6   2 39.1305 6.65604   2 
  -5   6   2 29.4362 4.54243   1 
  -5   6   2 39.6063 7.34147   2 
   4  -6  -2 40.7885 9.68110   2 
   4  -6  -2 24.1526 4.41540   2 
   4  -6  -2 22.9631 4.54141   1 
  -4   6   2 22.6097 5.14711   2 
  -4   6   2 27.9395 3.68987   1 
  -4   6   2 24.5552 5.08074   2 
   3  -6  -2 16.4052 3.55950   1 
   3  -6  -2 11.6791 3.90451   2 
   3  -6  -2 12.2649 7.64391   2 
  -3   6   2 13.5583 3.64813   2 
  -3   6   2 9.66114 2.50570   1 
  -3   6   2 9.98854 3.76350   2 
   2  -6  -2 1571.52 43.5505   2 
   2  -6  -2 1819.89 41.3075   2 
   2  -6  -2 1823.20 39.3191   1 
  -2   6   2 1794.45 39.3622   2 
  -2   6   2 1822.26 39.7416   2 
  -2   6   2 1820.04 37.9938   1 
   1  -6  -2 2.32858 2.20526   1 
   1  -6  -2 2.04901 3.41888   2 
   1  -6  -2 1.16470 3.14736   2 
  -1   6   2 1.87497 2.34515   2 
  -1   6   2 1.94607 1.17885   1 
  -1   6   2 -3.3384 2.44758   2 
   0  -6  -2 1018.48 23.8785   2 
   0  -6  -2 1024.50 25.4350   2 
   0   6   2 1025.75 23.8866   2 
   0   6   2 1014.81 23.8171   2 
  -1  -6  -2 15.4865 3.18449   2 
  -1  -6  -2 20.4139 4.70491   2 
   1   6   2 21.5104 3.42081   2 
   1   6   2 15.5215 3.29785   2 
  -2  -6  -2 146.122 9.91349   2 
  -2  -6  -2 146.364 6.49954   2 
   2   6   2 135.717 7.65100   2 
   2   6   2 143.640 7.19171   2 
  -3  -6  -2 259.468 13.1115   2 
  -3  -6  -2 243.304 8.96356   2 
   3   6   2 225.652 9.99862   2 
  -4  -6  -2 10.5043 7.25186   2 
  -4  -6  -2 12.8800 4.13172   2 
   4   6   2 12.0567 5.51848   2 
   4   6   2 14.8997 6.01058   2 
  -5  -6  -2 1.04298 2.83227   1 
  -5  -6  -2 -6.6090 8.93992   2 
  -5  -6  -2 -4.0678 5.13178   2 
   5   6   2 -11.247 6.93618   2 
   5   6   2 -3.3627 6.02319   2 
  -6  -6  -2 10.7850 3.85425   1 
  -6  -6  -2 -2.1900 6.65344   2 
  -6  -6  -2 19.1680 12.0791   2 
   6   6   2 13.1436 8.00899   2 
   6   6   2 19.1630 10.2188   2 
  -7  -6  -2 -9.9926 8.71036   2 
  -7  -6  -2 -2.3834 5.06472   1 
  -7  -6  -2 20.3496 16.7313   2 
   7   6   2 21.6535 12.8317   2 
   7   6   2 -12.209 10.4144   2 
   4  -7  -2 8.91012 4.90773   2 
   4  -7  -2 0.69848 5.11558   1 
  -4   7   2 7.04450 3.36871   1 
  -4   7   2 17.7168 5.89745   2 
  -4   7   2 17.8820 6.26373   2 
   3  -7  -2 65.0461 6.29495   2 
   3  -7  -2 62.8131 6.99475   1 
  -3   7   2 74.8404 7.43517   2 
  -3   7   2 64.7129 6.12301   2 
  -3   7   2 52.4254 4.42581   1 
   2  -7  -2 5.88515 3.24374   1 
   2  -7  -2 1.75932 4.43157   2 
   2  -7  -2 3.70097 6.96033   2 
  -2   7   2 3.13729 3.49831   2 
  -2   7   2 4.86745 1.86558   1 
  -2   7   2 8.74822 3.65071   2 
   1  -7  -2 57.7537 6.30257   2 
   1  -7  -2 51.2872 4.67687   1 
  -1   7   2 56.0565 5.77143   2 
  -1   7   2 60.6696 2.98952   1 
  -1   7   2 52.1724 4.89861   2 
   0  -7  -2 995.550 24.6088   2 
   0  -7  -2 1013.97 26.6089   2 
   0   7   2 1010.48 24.3921   2 
   0   7   2 1045.21 24.7437   2 
  -1  -7  -2 16.9123 3.98831   2 
   1   7   2 10.2613 3.68181   2 
   1   7   2 11.2355 3.91522   2 
  -2  -7  -2 386.489 11.8123   2 
  -2  -7  -2 319.638 18.7366   2 
   2   7   2 395.970 12.9951   2 
   2   7   2 381.458 12.5122   2 
  -3  -7  -2 8.91329 4.15891   2 
  -3  -7  -2 13.7407 13.8469   2 
   3   7   2 10.8828 5.20730   2 
   3   7   2 -1.9219 4.81436   2 
  -4  -7  -2 -1.0579 9.35673   2 
  -4  -7  -2 12.0231 4.99065   2 
   4   7   2 9.17602 6.57628   2 
  -5  -7  -2 86.1862 10.4571   2 
  -5  -7  -2 113.273 13.9320   2 
   5   7   2 89.4128 9.93388   2 
   5   7   2 78.1065 9.26147   2 
  -6  -7  -2 0.19214 7.71589   2 
  -6  -7  -2 3.74710 14.0767   2 
   6   7   2 12.9936 11.3004   2 
   6   7   2 2.23472 9.90497   2 
   3  -8  -2 20.0364 13.3680   2 
   3  -8  -2 65.1643 10.1083   1 
   3  -8  -2 48.9303 7.90892   2 
  -3   8   2 45.9160 6.82575   2 
  -3   8   2 52.7345 6.28114   1 
  -3   8   2 45.0615 6.62460   2 
   2  -8  -2 -2.5331 3.69056   1 
  -2   8   2 1.71974 4.68106   2 
  -2   8   2 4.12016 2.18795   1 
  -2   8   2 -4.7297 4.92338   2 
   1  -8  -2 -4.4323 9.91568   2 
   1  -8  -2 -0.6349 7.11469   2 
  -1   8   2 1.07282 4.59553   2 
  -1   8   2 1.28116 4.03221   2 
   0  -8  -2 0.45508 7.26538   2 
   0  -8  -2 9.29522 5.84840   2 
   0   8   2 13.8275 4.69350   2 
   0   8   2 11.0035 4.14312   2 
  -1  -8  -2 13.1876 5.34174   2 
  -1  -8  -2 9.25098 7.62171   2 
   1   8   2 14.0347 4.39850   2 
   1   8   2 14.4516 5.01856   2 
  -2  -8  -2 140.167 15.6429   2 
  -2  -8  -2 143.456 9.22040   2 
   2   8   2 146.839 10.2786   2 
   2   8   2 141.768 9.81926   2 
  -3  -8  -2 1.24127 9.33758   2 
  -3  -8  -2 -1.3672 5.24485   2 
   3   8   2 -11.281 6.01583   2 
   3   8   2 -0.1727 5.80130   2 
  -4  -8  -2 244.327 21.4545   2 
  -4  -8  -2 239.536 12.0549   2 
   4   8   2 247.498 14.8382   2 
   4   8   2 186.215 15.6571   2 
  -5  -8  -2 14.5037 7.22351   2 
  -5  -8  -2 22.1488 14.8393   2 
   5   8   2 2.71300 9.32532   2 
   5   8   2 -0.1085 10.0116   2 
   0  -9  -2 8.21669 9.76460   2 
   0   9   2 11.8159 6.27568   2 
   0   9   2 13.9247 5.75593   2 
  -1  -9  -2 -4.2376 7.05128   2 
  -1  -9  -2 -8.5308 10.3115   2 
   1   9   2 3.39291 6.21337   2 
   1   9   2 -1.8745 5.42403   2 
  -2  -9  -2 26.0046 7.10506   2 
  -2  -9  -2 23.9144 12.2046   2 
   2   9   2 21.1776 6.47360   2 
   2   9   2 19.4457 7.75272   2 
  -3  -9  -2 -6.1900 6.59379   2 
  -3  -9  -2 17.7339 13.5622   2 
   3   9   2 -21.436 8.31036   2 
   3   9   2 -1.6789 6.85798   2 
   3   8  -3 12.0051 8.40461   2 
   3   8  -3 19.8988 7.42525   2 
  -3  -8   3 21.6332 5.21787   2 
  -3  -8   3 21.4514 9.82998   2 
   2   8  -3 19.3220 5.56139   2 
   2   8  -3 2.72016 6.46246   2 
  -2  -8   3 14.8290 5.02249   2 
  -2  -8   3 23.3019 8.07254   2 
   1   8  -3 25.5229 4.89012   2 
   1   8  -3 15.7386 6.64874   2 
  -1  -8   3 17.9974 5.63118   2 
  -1  -8   3 16.7482 7.40649   2 
   0   8  -3 -2.8003 5.62562   2 
   0   8  -3 2.14886 4.32520   2 
   0  -8   3 -7.1944 5.73145   2 
  -1   8  -3 11.4338 4.32168   2 
  -1   8  -3 13.6040 5.95468   2 
   1  -8   3 21.3830 7.40089   2 
   1  -8   3 20.2729 7.47224   2 
   5   7  -3 18.2191 10.7960   2 
   5   7  -3 15.7963 9.75929   2 
  -5  -7   3 16.0660 11.9874   2 
   4   7  -3 13.5861 7.16553   2 
   4   7  -3 4.86280 7.50820   2 
  -4  -7   3 10.3602 4.51221   2 
  -4  -7   3 -5.4197 8.90232   2 
   3   7  -3 271.195 13.2290   2 
  -3  -7   3 285.246 14.6709   2 
  -3  -7   3 273.459 9.76667   2 
   2   7  -3 11.2944 4.99876   2 
   2   7  -3 21.1977 5.34585   2 
  -2  -7   3 20.9126 3.90952   2 
  -2  -7   3 17.7405 6.42383   2 
   1   7  -3 -4.8773 4.80938   2 
   1   7  -3 -0.1839 3.31083   2 
  -1  -7   3 -4.7274 5.65141   2 
  -1  -7   3 2.94426 3.54019   2 
   0   7  -3 4.03953 4.59158   2 
   0   7  -3 9.36480 3.42623   2 
   0  -7   3 7.39823 4.24746   2 
   0  -7   3 16.2571 5.48960   2 
  -1   7  -3 -1.5554 2.56800   2 
  -1   7  -3 2.84397 4.11447   2 
   1  -7   3 -1.9205 4.89221   2 
  -2   7  -3 -0.1772 4.67916   2 
  -2   7  -3 1.63890 3.22901   2 
   2  -7   3 -0.8535 6.36326   2 
  -3   7  -3 67.0447 6.12718   1 
  -3   7  -3 67.1587 7.44618   2 
  -3   7  -3 82.5615 8.42127   2 
   3  -7   3 68.1918 7.13822   1 
   6   6  -3 9.81047 9.45841   2 
   6   6  -3 48.8669 11.7868   2 
  -6  -6   3 9.95434 7.30066   2 
  -6  -6   3 39.0969 13.1215   2 
   5   6  -3 65.2883 10.1204   2 
   5   6  -3 79.0459 8.99790   2 
  -5  -6   3 68.1554 6.79913   2 
  -5  -6   3 77.3484 11.3519   2 
   4   6  -3 1.99074 5.50208   2 
   4   6  -3 14.7630 6.70162   2 
  -4  -6   3 -2.8131 7.75776   2 
  -4  -6   3 1.83689 4.37779   2 
   3   6  -3 47.7541 6.25612   2 
   3   6  -3 41.7418 5.80337   2 
  -3  -6   3 53.2419 6.74038   2 
  -3  -6   3 43.2398 4.15412   2 
   2   6  -3 15.0313 4.34844   2 
  -2  -6   3 22.2472 4.98462   2 
  -2  -6   3 18.5267 2.98165   2 
   1   6  -3 23.7341 4.39304   2 
   1   6  -3 26.6365 4.11133   2 
  -1  -6   3 19.8985 5.00628   2 
  -1  -6   3 24.2842 3.01939   2 
   0   6  -3 4.20932 3.24583   2 
   0  -6   3 9.14644 4.19134   2 
   0  -6   3 6.83275 3.11487   2 
  -1   6  -3 8.53917 2.49617   2 
  -1   6  -3 5.64468 3.27114   2 
   1  -6   3 6.63134 3.90116   2 
  -2   6  -3 17.2710 3.74127   2 
  -2   6  -3 18.7503 2.69700   1 
  -2   6  -3 19.6587 2.96318   2 
   2  -6   3 15.3508 5.20004   2 
   2  -6   3 17.7425 4.06826   2 
  -3   6  -3 7.79193 4.30124   2 
  -3   6  -3 9.57637 3.29565   2 
  -3   6  -3 15.3226 3.30926   1 
   3  -6   3 11.7128 6.42251   2 
   3  -6   3 18.2407 3.68498   1 
  -4   6  -3 14.0459 5.32846   2 
  -4   6  -3 -0.0416 4.49044   2 
  -4   6  -3 3.34592 3.86186   1 
   4  -6   3 1.75468 3.82801   2 
   4  -6   3 0.22188 4.07089   1 
   6   5  -3 -0.8353 4.15076   1 
   6   5  -3 4.89639 7.87691   2 
   6   5  -3 10.9293 10.1830   2 
  -6  -5   3 -11.446 6.37371   2 
  -6  -5   3 -1.8310 2.50024   1 
  -6  -5   3 13.6805 9.90969   2 
   5   5  -3 26.7453 3.53819   1 
   5   5  -3 34.4149 6.92842   2 
   5   5  -3 44.0519 13.1627   2 
  -5  -5   3 32.4144 8.67571   2 
  -5  -5   3 31.3136 5.66128   2 
  -5  -5   3 22.0806 2.28098   1 
   4   5  -3 18.7599 6.14429   2 
   4   5  -3 17.2463 4.99252   2 
  -4  -5   3 22.4304 6.63657   2 
   3   5  -3 3.45667 4.46522   2 
   3   5  -3 11.3814 3.88532   2 
  -3  -5   3 5.84177 4.63409   2 
  -3  -5   3 4.74826 2.73241   2 
   2   5  -3 22.8014 3.79784   2 
   2   5  -3 36.1817 4.60091   2 
  -2  -5   3 27.6793 2.82936   2 
  -2  -5   3 24.9283 4.25280   2 
   1   5  -3 11.0469 3.00535   2 
   1   5  -3 19.8065 2.94017   2 
  -1  -5   3 18.0325 2.29369   2 
  -1  -5   3 13.3518 3.89114   2 
   0   5  -3 44.0904 3.60579   2 
   0   5  -3 43.3514 3.59327   2 
   0  -5   3 42.4088 3.83588   2 
   0  -5   3 43.0182 4.31972   2 
  -1   5  -3 64.8006 3.73292   2 
  -1   5  -3 67.6087 4.44136   2 
   1  -5   3 62.4836 5.16973   2 
   1  -5   3 65.5337 5.06029   2 
  -2   5  -3 54.8317 3.90632   1 
  -2   5  -3 45.3964 4.38888   2 
  -2   5  -3 54.2953 3.68204   2 
   2  -5   3 54.5018 4.11208   1 
   2  -5   3 41.9030 4.60518   2 
  -3   5  -3 4.19018 2.49114   1 
  -3   5  -3 6.16087 3.29643   2 
  -3   5  -3 -0.7159 2.43869   2 
   3  -5   3 3.05201 4.99058   2 
   3  -5   3 11.2094 2.97225   1 
   3  -5   3 8.34408 2.82148   2 
  -4   5  -3 51.7813 5.48684   2 
  -4   5  -3 56.1209 6.25224   2 
  -4   5  -3 59.0299 6.10645   1 
   4  -5   3 59.5725 7.39380   2 
   4  -5   3 60.2853 4.94438   2 
   4  -5   3 63.3832 6.40476   1 
  -5   5  -3 7.25820 4.95843   2 
  -5   5  -3 12.8629 4.38424   1 
  -5   5  -3 3.70677 6.31308   2 
   5  -5   3 12.1952 3.59897   2 
   5  -5   3 7.72607 9.20591   2 
   5  -5   3 8.46695 4.55506   1 
   7   4  -3 0.64421 5.30122   1 
   7   4  -3 -6.7054 8.56301   2 
   7   4  -3 -6.2959 11.9253   2 
  -7  -4   3 22.1711 9.04416   2 
  -7  -4   3 1.38218 3.87111   1 
  -7  -4   3 15.6068 12.7679   2 
   6   4  -3 8.90174 3.79650   1 
   6   4  -3 5.27334 6.59454   2 
   6   4  -3 -2.3797 9.06383   2 
  -6  -4   3 6.53314 2.91884   1 
  -6  -4   3 1.96100 9.35016   2 
  -6  -4   3 12.2148 6.25510   2 
   5   4  -3 10.3343 7.12400   2 
   5   4  -3 1.17759 2.82796   1 
   5   4  -3 3.79936 5.10290   2 
  -5  -4   3 1.15064 2.06208   1 
  -5  -4   3 10.9245 10.4665   2 
  -5  -4   3 4.54561 4.81477   2 
   4   4  -3 80.0974 4.30092   1 
   4   4  -3 88.6710 7.28728   2 
   4   4  -3 86.9055 9.27378   2 
  -4  -4   3 81.8270 9.60183   2 
  -4  -4   3 74.2766 6.59990   2 
   3   4  -3 15.6519 3.61498   2 
   3   4  -3 12.3618 4.08126   2 
  -3  -4   3 11.0578 4.52815   2 
   2   4  -3 10.4360 3.04522   2 
   2   4  -3 9.74145 2.86006   2 
  -2  -4   3 12.0059 3.38580   2 
  -2  -4   3 11.0153 2.06962   2 
   1   4  -3 183.845 6.86224   2 
   1   4  -3 200.171 6.85325   2 
  -1  -4   3 198.971 7.64262   2 
  -1  -4   3 194.593 5.57084   2 
   0   4  -3 18.6456 2.38071   2 
   0   4  -3 21.6281 2.26855   2 
   0  -4   3 25.7626 3.09744   2 
   0  -4   3 21.8799 2.56196   2 
  -1   4  -3 31.3704 2.60465   2 
  -1   4  -3 38.1757 3.03826   2 
  -1   4  -3 38.0239 2.68849   1 
   1  -4   3 37.9101 3.71779   2 
  -2   4  -3 0.80650 1.53036   2 
  -2   4  -3 3.55607 2.23123   2 
  -2   4  -3 -2.4268 1.59272   1 
   2  -4   3 -1.2071 1.67814   1 
   2  -4   3 -1.6368 2.93869   2 
  -3   4  -3 6.67832 3.11719   2 
  -3   4  -3 10.2472 2.29948   2 
  -3   4  -3 9.95920 2.38810   1 
   3  -4   3 6.82114 2.42670   1 
   3  -4   3 12.7609 4.43329   2 
  -4   4  -3 21.6038 3.69548   2 
  -4   4  -3 21.3457 3.40657   1 
  -4   4  -3 23.8211 4.66849   2 
   4  -4   3 20.7018 5.63450   2 
   4  -4   3 23.8312 2.49372   2 
   4  -4   3 25.5612 3.97397   1 
  -5   4  -3 31.1001 6.52046   2 
  -5   4  -3 26.5597 4.18287   1 
  -5   4  -3 35.3336 5.39435   2 
   5  -4   3 32.2197 3.37396   2 
   5  -4   3 30.4677 8.39474   2 
   5  -4   3 30.0252 4.87284   1 
  -6   4  -3 9.71068 4.86080   1 
  -6   4  -3 14.2283 6.21544   2 
   6  -4   3 4.35869 5.28061   1 
   6  -4   3 0.47827 10.2286   2 
   6  -4   3 4.32847 2.88714   2 
   7   3  -3 4.14307 11.0345   2 
   7   3  -3 -2.1619 7.69587   2 
   7   3  -3 -7.3759 4.81077   1 
  -7  -3   3 3.63952 8.01124   2 
  -7  -3   3 23.3060 11.1677   2 
  -7  -3   3 -8.6896 3.68780   1 
   6   3  -3 13.2900 8.28175   2 
   6   3  -3 7.64888 3.78305   1 
   6   3  -3 0.57054 5.60600   2 
  -6  -3   3 21.3265 6.80043   2 
  -6  -3   3 1.38120 3.10070   1 
   5   3  -3 2.25856 4.34983   2 
   5   3  -3 3.42413 2.70324   1 
   5   3  -3 4.75301 7.05050   2 
  -5  -3   3 2.57390 2.19890   1 
  -5  -3   3 6.35423 4.49448   2 
  -5  -3   3 -0.1401 5.76496   2 
   4   3  -3 17.6960 5.30919   2 
   4   3  -3 7.23134 3.48019   2 
   4   3  -3 10.1530 2.26859   1 
  -4  -3   3 17.8177 3.83033   2 
  -4  -3   3 15.5437 4.62278   2 
  -4  -3   3 12.5480 1.91035   1 
   3   3  -3 174.198 8.65401   2 
   3   3  -3 184.330 5.38009   1 
   3   3  -3 172.824 7.29741   2 
  -3  -3   3 181.094 4.68971   1 
  -3  -3   3 180.808 8.43000   2 
   2   3  -3 594.430 15.8196   2 
   2   3  -3 605.869 15.0260   2 
  -2  -3   3 595.021 15.7302   2 
  -2  -3   3 607.299 14.2051   2 
   1   3  -3 86.8287 4.16056   2 
   1   3  -3 80.0675 4.54888   2 
  -1  -3   3 80.7028 4.63254   2 
  -1  -3   3 82.4946 3.16688   2 
   0   3  -3 17.6020 1.88700   2 
   0   3  -3 15.9000 1.73278   2 
  -1   3  -3 854.159 18.6488   1 
  -1   3  -3 837.599 18.3506   2 
  -1   3  -3 838.734 18.3453   2 
   1  -3   3 833.501 18.7556   1 
  -2   3  -3 186.952 5.96110   2 
  -2   3  -3 185.258 5.41149   2 
  -2   3  -3 185.734 5.83528   1 
   2  -3   3 194.060 6.14739   1 
  -3   3  -3 120.357 6.27879   2 
  -3   3  -3 123.098 5.00186   2 
  -3   3  -3 118.611 5.08895   1 
   3  -3   3 110.567 5.26195   1 
   3  -3   3 119.010 6.83876   2 
   3  -3   3 120.904 4.06533   2 
  -4   3  -3 2.82307 4.12172   2 
  -4   3  -3 3.93177 2.32015   2 
  -4   3  -3 1.08088 2.47086   1 
   4  -3   3 2.93098 2.43105   1 
   4  -3   3 -5.2249 4.73423   2 
   4  -3   3 2.21636 1.53834   2 
  -5   3  -3 10.0716 5.98626   2 
  -5   3  -3 10.9812 3.02810   1 
  -5   3  -3 5.46821 3.85227   2 
   5  -3   3 11.2820 2.20602   2 
   5  -3   3 6.74011 6.79235   2 
   5  -3   3 10.8070 3.84562   1 
  -6   3  -3 7.14213 4.09935   1 
  -6   3  -3 4.99836 7.20580   2 
  -6   3  -3 -5.4758 5.03280   2 
   6  -3   3 -2.0918 4.27818   1 
   6  -3   3 5.44274 2.42477   2 
   6  -3   3 5.53881 8.75269   2 
  -7   3  -3 8.23427 9.34628   2 
  -7   3  -3 -0.9314 8.05539   2 
  -7   3  -3 -1.6896 5.59876   1 
   7  -3   3 2.97873 3.57374   2 
   7  -3   3 -7.3460 12.0443   2 
   7  -3   3 -8.9862 5.23574   1 
   7   2  -3 19.6405 15.8027   2 
   7   2  -3 29.1766 7.38817   2 
   7   2  -3 22.6035 5.42276   1 
  -7  -2   3 35.3968 10.3089   2 
  -7  -2   3 26.2814 7.88396   2 
  -7  -2   3 21.9742 4.44311   1 
   6   2  -3 58.9976 6.41926   1 
   6   2  -3 52.8807 6.55688   2 
   6   2  -3 53.4046 9.91360   2 
  -6  -2   3 55.3507 5.19375   1 
  -6  -2   3 58.2760 8.92150   2 
  -6  -2   3 42.2298 6.81026   2 
   5   2  -3 85.8194 9.07007   2 
   5   2  -3 93.6782 5.64943   1 
   5   2  -3 85.8399 7.23784   2 
  -5  -2   3 90.3062 4.73327   1 
  -5  -2   3 91.2574 7.87630   2 
  -5  -2   3 90.8334 9.44816   2 
   4   2  -3 56.6373 5.44276   2 
   4   2  -3 56.4565 6.43167   2 
   4   2  -3 58.7244 3.85945   1 
  -4  -2   3 56.3713 3.29442   1 
  -4  -2   3 62.9299 6.09508   2 
  -4  -2   3 52.5727 5.64294   2 
   3   2  -3 183.537 8.94081   2 
   3   2  -3 194.120 5.73462   1 
   3   2  -3 182.696 7.08933   2 
  -3  -2   3 191.959 7.82331   2 
  -3  -2   3 192.481 7.06649   2 
  -3  -2   3 188.268 5.12680   1 
   2   2  -3 90.1699 3.02943   1 
   2   2  -3 89.5787 4.36182   2 
   2   2  -3 80.2857 5.47396   2 
  -2  -2   3 87.0785 2.52360   1 
  -2  -2   3 86.7882 5.08254   2 
   1   2  -3 124.323 4.35449   2 
   1   2  -3 116.640 5.04518   2 
   1   2  -3 121.434 2.95147   1 
  -1  -2   3 114.654 4.84772   2 
  -1  -2   3 122.349 3.67891   2 
   0   2  -3 1844.91 38.1162   2 
   0   2  -3 1806.00 38.2639   1 
  -1   2  -3 247.867 6.35263   1 
   1  -2   3 239.689 6.42901   1 
  -2   2  -3 276.241 6.97529   2 
  -2   2  -3 268.245 7.64816   2 
  -2   2  -3 282.911 7.60118   1 
   2  -2   3 276.206 7.67988   1 
  -3   2  -3 845.215 19.5711   1 
  -3   2  -3 817.906 19.8622   2 
  -3   2  -3 847.746 19.2459   2 
   3  -2   3 822.268 20.2222   2 
   3  -2   3 820.464 18.2540   2 
   3  -2   3 843.252 19.7774   1 
  -4   2  -3 274.070 10.6752   2 
  -4   2  -3 279.944 8.73343   1 
  -4   2  -3 271.154 9.01425   2 
   4  -2   3 268.803 10.9556   2 
   4  -2   3 279.819 7.49195   2 
   4  -2   3 289.355 9.13371   1 
  -5   2  -3 128.883 6.77102   1 
  -5   2  -3 133.581 9.67968   2 
  -5   2  -3 134.734 7.64328   2 
   5  -2   3 144.965 10.4692   2 
   5  -2   3 119.375 6.83274   1 
   5  -2   3 128.529 5.18003   2 
  -6   2  -3 15.9370 6.97630   2 
  -6   2  -3 6.15119 5.12487   2 
  -6   2  -3 12.1602 3.58201   1 
   6  -2   3 9.66377 2.85841   2 
   6  -2   3 7.49291 7.55505   2 
   6  -2   3 10.1999 3.83427   1 
  -7   2  -3 17.4639 7.84332   2 
  -7   2  -3 15.3351 4.46438   1 
  -7   2  -3 24.5206 9.67074   2 
   7  -2   3 4.02637 5.15756   1 
   7  -2   3 18.5547 3.98087   2 
   7  -2   3 17.4458 10.7929   2 
   8   1  -3 67.2076 17.0489   2 
   8   1  -3 56.2239 9.05971   2 
   8   1  -3 50.5468 7.53506   1 
  -8  -1   3 43.3341 6.36892   1 
  -8  -1   3 53.5115 14.1152   2 
  -8  -1   3 48.7017 11.8724   2 
   7   1  -3 -1.1080 6.15650   2 
   7   1  -3 -3.9756 4.24949   1 
   7   1  -3 4.89404 11.3040   2 
  -7  -1   3 -2.2438 3.95254   1 
  -7  -1   3 1.96633 7.60102   2 
  -7  -1   3 -0.8090 8.91240   2 
   6   1  -3 -2.7471 4.06877   2 
   6   1  -3 -0.9872 3.65585   1 
   6   1  -3 -6.7254 8.31075   2 
  -6  -1   3 4.29584 5.31598   2 
  -6  -1   3 11.2663 7.21333   2 
  -6  -1   3 2.60025 4.29869   1 
   5   1  -3 6.14884 3.82687   2 
   5   1  -3 6.31865 2.58858   1 
   5   1  -3 6.85455 6.28242   2 
  -5  -1   3 6.67194 4.22939   2 
  -5  -1   3 -0.0750 2.08655   1 
  -5  -1   3 3.67915 4.92714   2 
   4   1  -3 5.68973 4.89622   2 
   4   1  -3 3.12221 2.81366   2 
   4   1  -3 4.25757 1.81674   1 
  -4  -1   3 4.05411 2.94527   2 
  -4  -1   3 3.26692 1.66791   1 
  -4  -1   3 -0.5294 3.58613   2 
   3   1  -3 241.496 6.89072   1 
   3   1  -3 249.198 9.81189   2 
   3   1  -3 245.546 7.81246   2 
  -3  -1   3 238.536 7.91516   2 
  -3  -1   3 235.324 8.53261   2 
  -3  -1   3 242.282 6.42464   1 
   2   1  -3 0.77508 0.93994   1 
   2   1  -3 2.00516 1.69866   2 
   2   1  -3 1.37037 2.60825   2 
  -2  -1   3 -1.5638 2.00974   2 
  -2  -1   3 -0.4159 0.76597   1 
   1   1  -3 44.9302 1.54517   1 
   1   1  -3 40.6288 3.66764   2 
   1   1  -3 42.0715 2.58941   2 
  -1  -1   3 42.2188 1.46568   1 
  -1  -1   3 42.5448 2.44066   2 
  -1  -1   3 43.8348 2.97564   2 
   0   1  -3 0.48358 0.66924   1 
  -1   1  -3 942.545 20.5868   1 
  -2   1  -3 210.691 6.58097   2 
  -2   1  -3 207.220 5.61784   2 
  -2   1  -3 223.117 6.16614   1 
   2  -1   3 204.590 6.27447   2 
   2  -1   3 216.332 6.25310   1 
  -3   1  -3 38.1406 4.01578   2 
  -3   1  -3 41.3036 3.11504   2 
  -3   1  -3 36.8697 2.94099   1 
   3  -1   3 37.4995 2.97052   1 
   3  -1   3 39.7130 2.31988   2 
   3  -1   3 38.7729 4.76850   2 
  -4   1  -3 40.7722 3.37950   1 
  -4   1  -3 41.7367 6.65713   2 
  -4   1  -3 40.3459 4.26334   2 
   4  -1   3 39.1000 3.05372   2 
   4  -1   3 46.4839 3.56551   1 
   4  -1   3 42.4718 4.84901   2 
  -5   1  -3 143.902 6.23869   1 
  -5   1  -3 134.765 7.65408   2 
  -5   1  -3 143.874 9.80260   2 
   5  -1   3 143.357 5.82170   2 
   5  -1   3 137.477 9.51473   2 
   5  -1   3 139.149 6.53385   1 
  -6   1  -3 13.2534 3.12275   1 
  -6   1  -3 20.8673 5.94983   2 
  -6   1  -3 22.6370 7.01815   2 
   6  -1   3 20.7955 3.64145   2 
   6  -1   3 29.8295 7.87459   2 
   6  -1   3 18.7084 3.82084   1 
  -7   1  -3 20.5255 7.88861   2 
  -7   1  -3 14.2865 9.00760   2 
  -7   1  -3 20.4909 3.99998   1 
   7  -1   3 40.4834 10.4782   2 
   7  -1   3 21.9622 4.47954   2 
   7  -1   3 13.8971 4.43934   1 
   8   0  -3 15.2153 7.93010   2 
   7   0  -3 1.58352 6.97669   2 
   7   0  -3 -4.4828 4.13044   1 
   7   0  -3 7.81934 11.3574   2 
  -7   0   3 -5.8170 8.55882   2 
  -7   0   3 -3.8889 7.00528   2 
  -7   0   3 7.25315 3.94275   1 
   6   0  -3 2.94664 9.06641   2 
   6   0  -3 0.01919 3.08759   1 
   6   0  -3 4.55544 4.24177   2 
  -6   0   3 4.72616 2.75246   1 
  -6   0   3 2.54925 6.65979   2 
  -6   0   3 8.97177 5.56865   2 
   5   0  -3 1.29301 2.16755   1 
   5   0  -3 -2.5239 6.50624   2 
   5   0  -3 -1.9031 3.16569   2 
  -5   0   3 1.63024 3.76030   2 
  -5   0   3 1.36142 1.99502   1 
  -5   0   3 -2.7387 4.50804   2 
   4   0  -3 49.0251 4.39075   2 
   4   0  -3 47.5176 3.58568   1 
   4   0  -3 48.0500 6.10124   2 
  -4   0   3 45.2852 4.83061   2 
  -4   0   3 52.9778 3.31159   1 
  -4   0   3 48.6144 5.39514   2 
   3   0  -3 19.5050 4.02086   2 
   3   0  -3 20.3788 2.40626   2 
   3   0  -3 20.2947 2.39455   1 
  -3   0   3 17.8491 2.71369   2 
  -3   0   3 19.0770 2.14858   1 
  -3   0   3 21.0936 3.05266   2 
   2   0  -3 570.012 13.4932   2 
   2   0  -3 582.971 13.0131   1 
   2   0  -3 554.670 14.4273   2 
  -2   0   3 577.485 13.7338   2 
  -2   0   3 571.733 14.0048   2 
  -2   0   3 578.182 12.7283   1 
   1   0  -3 804.386 17.7644   2 
   1   0  -3 831.217 17.3503   1 
   1   0  -3 801.939 18.1792   2 
  -1   0   3 813.368 17.9217   2 
  -1   0   3 825.487 17.2710   1 
   0   0  -3 220.039 5.22957   1 
   0   0   3 225.206 5.36620   1 
  -1   0  -3 464.127 10.8074   1 
  -2   0  -3 221.374 6.22685   1 
  -2   0  -3 220.929 6.96004   2 
  -2   0  -3 225.648 6.06117   2 
   2   0   3 218.279 6.51071   2 
   2   0   3 224.270 5.71832   2 
   2   0   3 218.875 6.30881   1 
  -3   0  -3 128.529 4.97867   2 
  -3   0  -3 126.350 4.74209   1 
   3   0   3 124.904 6.09139   2 
   3   0   3 117.777 4.69035   1 
   3   0   3 124.966 4.33028   2 
  -4   0  -3 13.3526 2.16338   1 
  -4   0  -3 16.7535 2.97818   2 
  -4   0  -3 18.9265 4.27876   2 
   4   0   3 6.97805 3.26380   2 
   4   0   3 17.8802 2.27661   2 
   4   0   3 15.3232 2.20763   1 
  -5   0  -3 47.8158 4.03450   1 
  -5   0  -3 49.9238 6.28336   2 
  -5   0  -3 50.4998 5.07846   2 
   5   0   3 51.6306 4.46913   2 
   5   0   3 46.2230 4.31260   1 
  -6   0  -3 12.4704 7.00400   2 
  -6   0  -3 7.79121 4.82301   2 
  -6   0  -3 9.84093 3.13541   1 
   6   0   3 7.29984 2.99856   1 
   6   0   3 11.4027 3.24878   2 
  -7   0  -3 23.6728 4.59750   1 
  -7   0  -3 34.8735 7.38488   2 
  -7   0  -3 40.7332 9.49310   2 
   7   0   3 46.6016 17.5979   2 
   7   0   3 41.3487 5.52715   2 
   7   0   3 24.7838 4.46769   1 
  -8   0  -3 42.9102 11.0098   2 
  -8   0  -3 45.5719 6.00754   1 
  -8   0  -3 61.9630 13.5145   2 
   8   0   3 66.2819 15.6535   2 
   8   0   3 53.3559 6.73780   1 
   8   0   3 37.8111 7.25425   2 
   7  -1  -3 20.8979 4.53225   1 
   7  -1  -3 45.9473 13.2120   2 
   7  -1  -3 32.5102 5.99875   2 
  -7   1   3 39.5391 8.54046   2 
  -7   1   3 33.6063 4.28198   1 
  -7   1   3 45.4391 9.71745   2 
   6  -1  -3 175.006 17.0653   2 
   6  -1  -3 189.736 9.40656   2 
   6  -1  -3 179.619 8.33136   1 
  -6   1   3 184.349 7.34215   1 
  -6   1   3 173.707 11.3764   2 
  -6   1   3 199.930 13.0387   2 
   5  -1  -3 2.13125 2.07210   1 
   5  -1  -3 0.32950 2.82353   2 
   5  -1  -3 3.24892 6.64760   2 
  -5   1   3 3.36406 3.89640   2 
  -5   1   3 4.91742 5.05526   2 
  -5   1   3 -1.4670 1.86094   1 
   4  -1  -3 18.1067 5.08273   2 
   4  -1  -3 18.7564 2.87930   2 
   4  -1  -3 15.0373 2.42538   1 
  -4   1   3 20.7820 4.08129   2 
  -4   1   3 16.3708 1.99536   1 
  -4   1   3 18.5507 3.27872   2 
   3  -1  -3 10.0063 3.57694   2 
   3  -1  -3 6.89120 1.80962   2 
   3  -1  -3 4.16368 1.48730   1 
  -3   1   3 7.55788 2.84040   2 
  -3   1   3 8.34109 1.48037   1 
  -3   1   3 9.93924 2.33585   2 
   2  -1  -3 78.2880 4.67460   2 
   2  -1  -3 79.7601 3.12411   1 
   2  -1  -3 77.3709 3.33679   2 
  -2   1   3 75.4573 4.00185   2 
  -2   1   3 77.6958 3.60463   2 
   1  -1  -3 447.333 9.92519   1 
   1  -1  -3 445.895 10.6828   2 
   1  -1  -3 443.112 10.1213   2 
  -1   1   3 444.459 10.2671   2 
  -1   1   3 449.378 9.79663   1 
  -1   1   3 436.839 10.3079   2 
   0  -1  -3 245.361 5.65547   1 
   0  -1  -3 252.748 5.74787   2 
   0  -1  -3 248.611 5.76364   2 
   0   1   3 242.190 5.68785   2 
   0   1   3 243.299 5.76711   1 
  -1  -1  -3 32.8573 2.00207   2 
   1   1   3 35.3614 2.07817   2 
   1   1   3 32.5655 1.85337   2 
  -2  -1  -3 1866.86 39.4740   2 
  -2  -1  -3 1832.67 39.5887   1 
  -2  -1  -3 1841.76 40.1034   2 
   2   1   3 1851.48 39.4532   2 
   2   1   3 1869.80 39.6651   1 
  -3  -1  -3 65.4580 3.31493   1 
  -3  -1  -3 63.8276 5.42663   2 
  -3  -1  -3 57.7504 3.96751   2 
   3   1   3 61.3808 3.29503   1 
   3   1   3 65.8843 3.66876   2 
  -4  -1  -3 11.6653 2.89299   2 
  -4  -1  -3 11.0417 4.50529   2 
  -4  -1  -3 8.90240 2.01792   1 
   4   1   3 10.6306 1.86419   1 
   4   1   3 5.02330 2.14361   2 
   4   1   3 7.25365 3.79600   2 
  -5  -1  -3 198.716 9.09479   2 
  -5  -1  -3 214.473 11.1612   2 
  -5  -1  -3 191.426 7.22773   1 
   5   1   3 209.667 10.5820   2 
   5   1   3 198.061 7.99541   2 
   5   1   3 196.087 7.38550   1 
  -6  -1  -3 -0.7009 6.76144   2 
  -6  -1  -3 8.61360 4.98281   2 
  -6  -1  -3 1.86399 2.61276   1 
   6   1   3 -1.2193 6.41629   2 
   6   1   3 -2.0855 2.60386   1 
  -7  -1  -3 -0.5509 9.00821   2 
  -7  -1  -3 4.42074 3.86817   1 
  -7  -1  -3 -2.3028 6.66249   2 
   7   1   3 3.69858 3.62025   1 
   7   1   3 0.46594 4.75709   2 
   7   1   3 -10.310 9.72744   2 
  -8  -1  -3 10.2891 5.39345   1 
  -8  -1  -3 10.6214 13.8405   2 
  -8  -1  -3 -3.3552 8.53329   2 
   8   1   3 -6.0354 12.9595   2 
   8   1   3 9.05982 5.71941   1 
   8   1   3 -4.3331 6.45254   2 
   7  -2  -3 9.82845 4.79559   1 
   7  -2  -3 15.4498 5.29016   2 
   7  -2  -3 -14.023 13.7195   2 
  -7   2   3 8.17119 8.34252   2 
  -7   2   3 8.23580 8.81397   2 
  -7   2   3 7.15369 3.98002   1 
   6  -2  -3 1.05642 3.65739   2 
   6  -2  -3 9.59289 9.34775   2 
   6  -2  -3 -1.1370 3.52259   1 
  -6   2   3 -0.9432 2.83956   1 
  -6   2   3 -4.4614 5.46661   2 
  -6   2   3 3.04716 6.45976   2 
   5  -2  -3 112.700 6.33359   2 
   5  -2  -3 106.622 6.23761   1 
   5  -2  -3 109.107 9.76438   2 
  -5   2   3 111.073 7.88845   2 
  -5   2   3 117.828 8.95053   2 
  -5   2   3 117.190 5.55469   1 
   4  -2  -3 256.633 8.08903   2 
   4  -2  -3 253.782 11.7941   2 
   4  -2  -3 251.015 8.33205   1 
  -4   2   3 264.911 7.75090   1 
  -4   2   3 258.923 9.64371   2 
  -4   2   3 248.952 9.24795   2 
   3  -2  -3 197.367 8.71764   2 
   3  -2  -3 201.350 6.33792   2 
   3  -2  -3 200.916 6.43023   1 
  -3   2   3 209.414 7.51539   2 
  -3   2   3 199.910 5.93339   1 
  -3   2   3 199.488 7.05562   2 
   2  -2  -3 114.878 5.89318   2 
   2  -2  -3 120.307 4.11411   1 
   2  -2  -3 117.499 4.07057   2 
  -2   2   3 117.595 4.80656   2 
  -2   2   3 118.837 4.48118   2 
  -2   2   3 119.029 3.70228   1 
   1  -2  -3 132.230 4.67792   2 
   1  -2  -3 131.412 3.93749   2 
   1  -2  -3 125.979 3.69101   1 
  -1   2   3 131.076 4.14054   2 
  -1   2   3 127.948 3.46836   1 
  -1   2   3 128.928 4.02459   2 
   0  -2  -3 21.8429 1.96726   2 
   0  -2  -3 22.3122 1.21129   1 
   0  -2  -3 22.8861 1.97129   2 
   0   2   3 21.1920 1.37860   1 
   0   2   3 22.2570 1.76819   2 
   0   2   3 23.2371 1.84419   2 
  -1  -2  -3 1569.16 34.0625   2 
  -1  -2  -3 1533.47 33.4517   2 
   1   2   3 1644.84 33.6369   2 
   1   2   3 1566.20 33.7095   2 
  -2  -2  -3 36.0495 2.31710   1 
  -2  -2  -3 38.4446 3.04987   2 
  -2  -2  -3 37.5480 4.30187   2 
   2   2   3 36.7861 3.86478   2 
   2   2   3 42.8511 3.19432   2 
  -3  -2  -3 22.5160 2.74508   2 
  -3  -2  -3 23.9460 4.02018   2 
  -3  -2  -3 21.8502 2.49346   1 
   3   2   3 23.0398 2.53798   1 
   3   2   3 27.2677 2.85348   2 
   3   2   3 21.6221 3.26061   2 
  -4  -2  -3 499.785 12.9392   1 
  -4  -2  -3 504.394 15.4638   2 
  -4  -2  -3 509.846 13.8670   2 
   4   2   3 499.681 13.6876   2 
   4   2   3 486.384 15.0976   2 
   4   2   3 491.798 13.0204   1 
  -5  -2  -3 45.4205 4.36832   1 
  -5  -2  -3 48.4413 5.19363   2 
  -5  -2  -3 58.8784 7.64527   2 
   5   2   3 48.1878 6.33436   2 
   5   2   3 48.4568 4.46446   1 
   5   2   3 57.7024 5.99210   2 
  -6  -2  -3 14.7235 5.46982   2 
  -6  -2  -3 29.5090 7.61611   2 
  -6  -2  -3 14.0054 4.60502   1 
   6   2   3 21.9745 7.62728   2 
   6   2   3 15.5906 4.50756   2 
  -7  -2  -3 9.92595 10.0783   2 
  -7  -2  -3 6.76872 4.21234   1 
  -7  -2  -3 -7.8859 11.6535   2 
   7   2   3 10.3217 5.90281   2 
   7   2   3 3.14187 4.12292   1 
   7   2   3 -1.7554 8.93664   2 
  -8  -2  -3 58.8890 13.9819   2 
  -8  -2  -3 61.8578 7.23092   1 
  -8  -2  -3 73.9570 11.6793   2 
   8   2   3 59.6786 8.34492   2 
   8   2   3 43.4668 14.0556   2 
   8   2   3 74.6883 8.07666   1 
   7  -3  -3 -6.6391 15.0437   2 
   7  -3  -3 -3.3813 5.03253   1 
   7  -3  -3 5.62660 5.30136   2 
  -7   3   3 -1.7531 8.69247   2 
  -7   3   3 -8.3712 3.85999   1 
  -7   3   3 7.47963 9.39013   2 
   6  -3  -3 -5.1847 10.1392   2 
   6  -3  -3 12.9416 4.08664   2 
   6  -3  -3 4.40543 3.67855   1 
  -6   3   3 -0.3896 3.01065   1 
  -6   3   3 18.7782 7.29133   2 
  -6   3   3 18.3500 6.08838   2 
   5  -3  -3 44.1050 9.17309   2 
   5  -3  -3 41.1422 4.16256   2 
   5  -3  -3 33.2959 4.11212   1 
  -5   3   3 33.9531 3.36825   1 
  -5   3   3 38.5410 5.73926   2 
  -5   3   3 31.3232 5.31653   2 
   4  -3  -3 2.39066 2.24355   1 
   4  -3  -3 -0.0933 5.51014   2 
  -4   3   3 -1.5859 1.81214   1 
  -4   3   3 5.66639 2.91429   2 
  -4   3   3 -0.2058 3.72999   2 
   3  -3  -3 241.288 7.19035   2 
   3  -3  -3 250.936 10.1628   2 
   3  -3  -3 248.018 7.69997   1 
  -3   3   3 247.552 7.00568   1 
  -3   3   3 242.305 8.15125   2 
  -3   3   3 250.152 8.40281   2 
   2  -3  -3 400.598 10.0767   2 
   2  -3  -3 404.304 10.2582   1 
   2  -3  -3 405.400 11.6567   2 
  -2   3   3 402.520 9.67018   1 
  -2   3   3 398.180 10.4910   2 
  -2   3   3 419.759 10.6311   2 
   1  -3  -3 5.72325 1.97738   2 
   1  -3  -3 4.99571 1.31876   2 
   1  -3  -3 1.91853 1.03100   1 
  -1   3   3 3.99632 1.41729   2 
  -1   3   3 4.78203 0.82446   1 
  -1   3   3 4.57833 1.40512   2 
   0  -3  -3 52.4493 2.94095   2 
   0  -3  -3 52.2436 1.92952   1 
   0  -3  -3 52.4223 2.88963   2 
   0   3   3 52.4646 1.97323   1 
   0   3   3 48.6960 2.64665   2 
   0   3   3 49.0004 2.74628   2 
  -1  -3  -3 1061.11 24.1847   2 
  -1  -3  -3 1079.18 22.5632   1 
  -1  -3  -3 1080.95 23.2778   2 
   1   3   3 1066.14 23.4106   2 
   1   3   3 1024.12 23.5591   2 
  -2  -3  -3 19.1899 3.04623   2 
  -2  -3  -3 20.0400 2.29933   2 
  -2  -3  -3 17.5658 1.99507   1 
   2   3   3 23.1033 2.92182   2 
   2   3   3 12.9653 2.03255   2 
  -3  -3  -3 10.1259 2.63604   2 
  -3  -3  -3 11.1098 1.83594   1 
  -3  -3  -3 9.59329 3.81085   2 
   3   3   3 9.55635 2.60916   2 
   3   3   3 9.83114 3.16800   2 
  -4  -3  -3 67.7744 8.31522   2 
  -4  -3  -3 66.6308 4.09377   1 
  -4  -3  -3 72.4326 5.94676   2 
   4   3   3 71.1016 7.01841   2 
   4   3   3 65.7031 5.58300   2 
   4   3   3 63.7532 4.03028   1 
  -5  -3  -3 17.8376 6.66771   2 
  -5  -3  -3 22.4814 2.97248   1 
  -5  -3  -3 25.4966 4.38865   2 
   5   3   3 25.2002 3.14494   1 
   5   3   3 19.7315 4.27607   2 
   5   3   3 21.4552 5.72263   2 
  -6  -3  -3 59.0512 9.69537   2 
  -6  -3  -3 71.5928 6.09391   1 
  -6  -3  -3 52.4958 6.84071   2 
   6   3   3 61.3104 8.63801   2 
   6   3   3 66.2315 6.24790   1 
   6   3   3 57.5827 6.77364   2 
  -7  -3  -3 12.4463 7.58073   2 
  -7  -3  -3 13.0353 4.77485   1 
  -7  -3  -3 27.0763 11.0038   2 
   7   3   3 16.5531 10.5961   2 
   7   3   3 15.6714 4.81261   1 
   7   3   3 -0.8541 6.07805   2 
  -8  -3  -3 43.5502 10.7801   2 
  -8  -3  -3 40.1771 15.5614   2 
  -8  -3  -3 39.9196 6.82408   1 
   8   3   3 46.6381 7.57829   1 
   8   3   3 50.1376 14.4736   2 
   8   3   3 45.6505 9.85540   2 
   6  -4  -3 3.43448 12.3911   2 
   6  -4  -3 1.90490 3.88433   2 
   6  -4  -3 -1.9548 4.28618   1 
  -6   4   3 4.94110 6.60147   2 
  -6   4   3 -3.2430 7.34263   2 
  -6   4   3 -1.6729 3.65097   1 
   5  -4  -3 27.7029 9.67443   2 
   5  -4  -3 13.5142 3.40799   2 
   5  -4  -3 15.1177 3.93489   1 
  -5   4   3 16.8622 5.22668   2 
  -5   4   3 16.6376 5.57558   2 
  -5   4   3 16.1131 3.06929   1 
   4  -4  -3 102.978 6.09394   1 
   4  -4  -3 105.660 5.39082   2 
   4  -4  -3 109.965 11.4562   2 
  -4   4   3 106.507 5.13738   1 
  -4   4   3 105.360 7.59457   2 
  -4   4   3 101.541 7.00816   2 
   3  -4  -3 14.1485 2.43103   1 
   3  -4  -3 16.4511 2.30954   2 
   3  -4  -3 14.1786 5.04424   2 
  -3   4   3 15.9675 2.15850   1 
  -3   4   3 16.9272 2.97478   2 
  -3   4   3 19.1944 3.42033   2 
   2  -4  -3 113.866 4.66866   1 
   2  -4  -3 115.455 4.77512   2 
   2  -4  -3 112.273 6.90788   2 
  -2   4   3 121.847 5.05168   2 
  -2   4   3 117.611 3.96127   1 
  -2   4   3 120.204 5.17179   2 
   1  -4  -3 8.35353 2.48512   2 
   1  -4  -3 6.74390 1.45569   1 
   1  -4  -3 7.69653 1.81038   2 
  -1   4   3 6.44429 1.74326   2 
  -1   4   3 7.81566 1.76394   2 
  -1   4   3 6.31359 1.05001   1 
   0  -4  -3 7.17145 2.11838   2 
   0  -4  -3 6.03473 1.04226   1 
   0  -4  -3 8.06666 1.90916   2 
   0   4   3 5.79972 1.76681   2 
   0   4   3 4.63946 0.95700   1 
   0   4   3 6.78265 1.78280   2 
  -1  -4  -3 5.53501 1.80097   2 
  -1  -4  -3 2.47993 2.70282   2 
  -1  -4  -3 2.18716 0.77298   1 
   1   4   3 5.41818 1.93400   2 
   1   4   3 3.45608 1.81228   2 
  -2  -4  -3 7.75928 1.33169   1 
  -2  -4  -3 6.03760 3.22076   2 
  -2  -4  -3 6.98617 1.45162   1 
  -2  -4  -3 6.06622 2.08976   2 
   2   4   3 6.24558 2.33255   2 
   2   4   3 3.90677 2.23076   2 
  -3  -4  -3 287.709 11.2173   2 
  -3  -4  -3 273.351 7.68016   1 
  -3  -4  -3 273.148 8.80416   2 
   3   4   3 273.334 9.44927   2 
   3   4   3 277.456 10.0685   2 
  -4  -4  -3 12.2437 2.31049   1 
  -4  -4  -3 7.34498 5.55632   2 
  -4  -4  -3 5.24999 3.35175   2 
   4   4   3 11.0640 3.81114   2 
   4   4   3 14.3249 4.77058   2 
  -5  -4  -3 3.49957 6.86019   2 
  -5  -4  -3 3.49991 4.27296   2 
  -5  -4  -3 8.77469 2.81573   1 
   5   4   3 9.74426 4.25800   2 
   5   4   3 12.3609 5.73960   2 
   5   4   3 3.42534 2.52125   1 
  -6  -4  -3 17.4946 4.00815   1 
  -6  -4  -3 1.84692 9.33316   2 
  -6  -4  -3 23.0350 6.49131   2 
   6   4   3 11.7762 7.47056   2 
   6   4   3 16.5987 3.98740   1 
   6   4   3 11.2891 5.82829   2 
  -7  -4  -3 14.1407 7.63997   2 
  -7  -4  -3 7.06545 12.0452   2 
  -7  -4  -3 5.43248 4.54624   1 
   7   4   3 8.12339 4.73175   1 
   7   4   3 11.6551 10.1961   2 
   7   4   3 5.03645 7.54223   2 
   6  -5  -3 59.7605 15.9122   2 
   6  -5  -3 44.6592 5.89350   2 
   6  -5  -3 35.2038 6.55155   1 
  -6   5   3 40.3404 5.09492   1 
  -6   5   3 39.6731 8.93754   2 
  -6   5   3 36.9623 8.45062   2 
   5  -5  -3 8.80556 10.5919   2 
   5  -5  -3 10.7585 3.47004   2 
   5  -5  -3 6.99830 4.35368   1 
  -5   5   3 12.9458 5.74661   2 
  -5   5   3 11.3604 3.46240   1 
  -5   5   3 25.3956 6.07358   2 
   4  -5  -3 4.44414 6.40445   1 
   4  -5  -3 -6.8257 7.27595   2 
   4  -5  -3 -0.9453 2.64468   2 
  -4   5   3 -4.3809 3.74081   2 
  -4   5   3 7.81409 4.30667   2 
   3  -5  -3 49.7751 6.93300   2 
   3  -5  -3 46.8278 4.63800   2 
   3  -5  -3 50.1555 5.00261   1 
  -3   5   3 44.3750 3.47240   1 
  -3   5   3 51.6663 5.49361   2 
  -3   5   3 47.5587 5.29761   2 
   2  -5  -3 56.5143 5.49346   2 
   2  -5  -3 59.3954 4.38166   1 
   2  -5  -3 63.8536 4.54558   2 
  -2   5   3 58.1540 2.99007   1 
  -2   5   3 57.3815 4.62256   2 
  -2   5   3 51.5704 4.47961   2 
   1  -5  -3 29.8575 3.65208   2 
   1  -5  -3 31.3791 3.27345   2 
   1  -5  -3 32.5279 3.02940   1 
  -1   5   3 31.7503 3.49921   2 
  -1   5   3 29.0470 2.84748   2 
  -1   5   3 34.3266 1.96678   1 
   0  -5  -3 4.54401 2.49315   2 
   0  -5  -3 3.23494 1.40122   1 
   0  -5  -3 0.66430 2.23535   2 
   0   5   3 3.44727 1.06842   1 
   0   5   3 4.45926 1.94445   2 
   0   5   3 2.00743 2.21195   2 
  -1  -5  -3 9.36387 3.40164   2 
  -1  -5  -3 7.65369 2.36971   2 
   1   5   3 7.42037 2.46606   2 
   1   5   3 10.2984 2.51304   2 
  -2  -5  -3 537.014 11.7443   1 
  -2  -5  -3 532.925 13.5850   2 
  -2  -5  -3 526.733 15.7980   2 
   2   5   3 530.597 14.1608   2 
   2   5   3 524.952 14.4265   2 
  -3  -5  -3 109.984 9.16368   2 
  -3  -5  -3 111.713 4.39466   1 
  -3  -5  -3 114.595 6.26696   2 
   3   5   3 103.960 6.64834   2 
  -4  -5  -3 36.1190 4.61025   2 
  -4  -5  -3 37.7967 4.04885   1 
  -4  -5  -3 37.5448 7.02370   2 
   4   5   3 30.3137 5.92638   2 
   4   5   3 35.6868 5.00485   2 
  -5  -5  -3 30.5044 5.32957   2 
  -5  -5  -3 30.4345 8.18007   2 
  -5  -5  -3 27.8062 3.45502   1 
   5   5   3 43.1522 7.19269   2 
   5   5   3 27.6963 5.84983   2 
  -6  -5  -3 7.60092 6.16491   2 
  -6  -5  -3 17.1297 10.5744   2 
  -6  -5  -3 15.3077 4.07439   1 
   6   5   3 4.28017 6.61701   2 
   6   5   3 13.6934 8.68195   2 
  -7  -5  -3 0.68895 4.86654   1 
  -7  -5  -3 1.61106 8.42836   2 
  -7  -5  -3 10.0510 14.3385   2 
   7   5   3 10.3803 8.69589   2 
   7   5   3 -1.7110 11.0855   2 
   5  -6  -3 22.7558 6.04243   1 
   5  -6  -3 21.0248 5.29109   2 
   5  -6  -3 14.4911 13.5165   2 
  -5   6   3 27.2219 6.90055   2 
  -5   6   3 19.9956 4.13520   1 
  -5   6   3 25.6555 7.04691   2 
   4  -6  -3 113.450 7.34792   2 
   4  -6  -3 104.143 11.5478   2 
   4  -6  -3 114.549 7.97576   1 
  -4   6   3 101.512 8.41414   2 
  -4   6   3 104.727 5.96245   1 
  -4   6   3 116.120 9.43855   2 
   3  -6  -3 -3.0934 6.98070   2 
   3  -6  -3 1.39218 3.20727   1 
   3  -6  -3 -2.9554 3.31160   2 
  -3   6   3 -0.8800 3.80122   2 
  -3   6   3 -0.7196 2.08949   1 
  -3   6   3 -3.5180 3.36369   2 
   2  -6  -3 -3.1710 2.78830   1 
   2  -6  -3 7.24469 2.98737   2 
   2  -6  -3 -7.0991 5.10054   2 
  -2   6   3 6.11256 2.82327   2 
  -2   6   3 -0.5780 2.68739   2 
  -2   6   3 -1.2323 1.49249   1 
   1  -6  -3 1.94268 3.50817   2 
   1  -6  -3 7.46218 3.40082   2 
   1  -6  -3 1.05336 2.18645   1 
  -1   6   3 3.43864 1.31082   1 
  -1   6   3 1.24284 2.32864   2 
  -1   6   3 2.50519 2.63595   2 
   0  -6  -3 541.063 12.9050   1 
   0  -6  -3 542.296 14.4664   2 
   0   6   3 548.185 14.3476   2 
   0   6   3 555.161 12.4577   1 
   0   6   3 544.145 14.2913   2 
  -1  -6  -3 47.3692 5.74804   2 
  -1  -6  -3 45.7260 5.07930   2 
   1   6   3 53.8987 5.05372   2 
   1   6   3 48.7874 5.07432   2 
  -2  -6  -3 122.198 6.32183   2 
  -2  -6  -3 120.650 9.23005   2 
   2   6   3 114.374 7.03451   2 
   2   6   3 124.096 6.85956   2 
  -3  -6  -3 -4.0606 6.02755   2 
  -3  -6  -3 1.72543 3.21682   2 
   3   6   3 5.39943 4.06706   2 
   3   6   3 -0.8004 3.96983   2 
  -4  -6  -3 22.5544 7.86033   2 
  -4  -6  -3 21.8777 4.56517   2 
  -4  -6  -3 20.9580 2.79384   1 
   4   6   3 17.0775 5.28967   2 
  -5  -6  -3 24.8590 3.58869   1 
  -5  -6  -3 17.1843 5.76084   2 
  -5  -6  -3 38.3556 10.0844   2 
   5   6   3 35.0604 6.68490   2 
   5   6   3 24.3376 7.87065   2 
  -6  -6  -3 0.24886 11.3686   2 
  -6  -6  -3 -6.3854 6.55987   2 
  -6  -6  -3 1.82388 4.11870   1 
   6   6   3 -13.706 8.94909   2 
   6   6   3 6.74867 7.80847   2 
  -7  -6  -3 7.47515 5.66647   1 
  -7  -6  -3 -17.417 16.2245   2 
  -7  -6  -3 -1.8832 8.72322   2 
   7   6   3 26.0029 13.3946   2 
   7   6   3 -14.587 9.79470   2 
   4  -7  -3 14.3020 6.01020   2 
   4  -7  -3 2.90148 12.0045   2 
   4  -7  -3 8.14946 5.44892   1 
  -4   7   3 -0.8552 3.19533   1 
  -4   7   3 7.06573 5.76061   2 
  -4   7   3 13.2487 6.21853   2 
   3  -7  -3 84.7647 8.35944   2 
   3  -7  -3 67.9967 7.35224   1 
   3  -7  -3 80.4005 10.6847   2 
  -3   7   3 65.3393 4.34968   1 
  -3   7   3 63.4070 6.18969   2 
  -3   7   3 73.2045 7.55388   2 
   2  -7  -3 1.85188 3.00559   1 
   2  -7  -3 -0.7323 4.47215   2 
   2  -7  -3 -6.1089 6.75186   2 
  -2   7   3 4.09309 1.91256   1 
  -2   7   3 3.99299 3.89581   2 
  -2   7   3 -3.0151 3.61907   2 
   1  -7  -3 6.68324 5.02723   2 
   1  -7  -3 5.40900 4.27442   2 
   1  -7  -3 3.06989 2.51354   1 
  -1   7   3 7.41959 1.69454   1 
  -1   7   3 4.50783 3.79103   2 
  -1   7   3 5.60464 3.41021   2 
   0  -7  -3 86.2065 7.59127   2 
   0  -7  -3 93.1472 9.85356   2 
   0   7   3 103.697 7.11253   2 
   0   7   3 100.459 6.33011   2 
  -1  -7  -3 1.95124 3.73804   2 
  -1  -7  -3 -11.873 5.65182   2 
   1   7   3 -2.9467 3.25932   2 
   1   7   3 3.38560 3.57912   2 
  -2  -7  -3 1718.93 41.6562   2 
  -2  -7  -3 1713.08 37.8571   2 
   2   7   3 1633.71 38.7991   2 
   2   7   3 1649.84 38.5123   2 
  -3  -7  -3 8.13484 7.87076   2 
  -3  -7  -3 6.92423 4.37990   2 
   3   7   3 6.61178 4.81467   2 
   3   7   3 -1.9961 4.41199   2 
   4   7   3 387.174 15.2876   2 
   4   7   3 393.100 16.0622   2 
  -5  -7  -3 5.90227 5.82662   2 
  -5  -7  -3 15.3295 12.0478   2 
   5   7   3 17.3034 7.99880   2 
  -6  -7  -3 14.7238 7.80746   2 
  -6  -7  -3 29.2699 14.8779   2 
  -6  -7  -3 9.95996 4.44463   1 
   6   7   3 5.27180 10.5557   2 
   6   7   3 -7.4911 14.1548   2 
   3  -8  -3 -8.9797 11.8724   2 
   3  -8  -3 -0.0016 5.17761   1 
   3  -8  -3 -2.0444 6.83156   2 
  -3   8   3 -2.1186 5.83777   2 
  -3   8   3 7.52545 2.83649   1 
  -3   8   3 -9.4181 5.53825   2 
   2  -8  -3 0.67961 4.18596   1 
   2  -8  -3 2.01079 5.95542   2 
   2  -8  -3 4.77878 8.68432   2 
  -2   8   3 3.72788 2.29956   1 
  -2   8   3 -0.8799 4.46613   2 
  -2   8   3 -7.0031 4.91060   2 
   1  -8  -3 80.3355 8.72286   2 
  -1   8   3 75.0502 7.43483   2 
  -1   8   3 81.5611 8.54042   2 
   0  -8  -3 16.2833 7.41328   2 
   0  -8  -3 2.65758 5.77914   2 
   0   8   3 6.56122 4.05363   2 
   0   8   3 5.95300 4.59476   2 
  -1  -8  -3 52.3106 6.31314   2 
  -1  -8  -3 52.1878 8.54368   2 
   1   8   3 58.8078 6.14784   2 
   1   8   3 58.0111 6.34591   2 
  -2  -8  -3 45.7291 9.27720   2 
  -2  -8  -3 74.4067 6.57539   2 
   2   8   3 96.3755 9.64112   2 
   2   8   3 86.0214 8.76812   2 
  -3  -8  -3 3.95963 5.33443   2 
  -3  -8  -3 0.32267 10.0986   2 
   3   8   3 1.06875 5.88671   2 
   3   8   3 -7.9843 5.64221   2 
  -4  -8  -3 617.526 26.9054   2 
   4   8   3 573.858 21.9348   2 
   4   8   3 564.226 21.2891   2 
  -5  -8  -3 15.7929 14.6057   2 
  -5  -8  -3 11.8432 7.29277   2 
   5   8   3 20.1841 9.96697   2 
   5   8   3 10.4109 8.76673   2 
   1  -9  -3 64.8827 10.8354   2 
   1  -9  -3 45.6572 11.2706   2 
  -1   9   3 53.5697 6.83110   2 
  -1   9   3 72.7459 8.47208   2 
   0  -9  -3 -13.203 9.91352   2 
   0  -9  -3 5.80376 8.22558   2 
   0   9   3 12.3979 6.30766   2 
   0   9   3 0.70017 5.32525   2 
  -1  -9  -3 2.48278 10.7649   2 
  -1  -9  -3 -0.3461 7.04365   2 
   1   9   3 2.87407 5.79710   2 
   1   9   3 7.84867 6.52861   2 
  -2  -9  -3 -5.5061 11.5773   2 
  -2  -9  -3 3.34031 6.36561   2 
   2   9   3 19.1655 7.29048   2 
   2   9   3 4.81696 5.98557   2 
  -3  -9  -3 -2.9546 6.50903   2 
  -3  -9  -3 26.9701 13.3797   2 
   3   9   3 5.50072 7.14494   2 
   3   9   3 -11.327 7.95716   2 
   2   8  -4 2.32708 7.62921   2 
   2   8  -4 -0.0164 5.29276   2 
  -2  -8   4 1.79618 4.93025   2 
  -2  -8   4 0.05658 7.96316   2 
   1   8  -4 7.89965 4.61973   2 
   1   8  -4 -6.4743 7.42559   2 
  -1  -8   4 -5.2672 5.45025   2 
   0   8  -4 2.00469 6.40247   2 
   0   8  -4 -0.2597 4.07422   2 
   4   7  -4 -14.560 7.26840   2 
   4   7  -4 7.91815 7.75100   2 
  -4  -7   4 8.16962 8.94223   2 
  -4  -7   4 -3.1015 4.47778   2 
   3   7  -4 177.400 12.0600   2 
  -3  -7   4 146.032 12.6335   2 
  -3  -7   4 166.900 8.13614   2 
   2   7  -4 63.3215 6.49045   2 
   2   7  -4 59.3198 6.93222   2 
  -2  -7   4 52.7374 5.93282   2 
  -2  -7   4 56.1574 7.29629   2 
   1   7  -4 110.456 9.73665   2 
   1   7  -4 103.781 6.76099   2 
  -1  -7   4 118.110 6.79411   2 
  -1  -7   4 115.347 10.0491   2 
   0   7  -4 14.9791 4.95757   2 
   0   7  -4 24.1941 3.81242   2 
  -1   7  -4 12.5681 3.05321   2 
  -1   7  -4 10.1316 4.57337   2 
  -2   7  -4 10.5971 3.57683   2 
  -2   7  -4 13.8463 4.96605   2 
  -3   7  -4 7.07286 3.92906   1 
  -3   7  -4 -3.3825 4.01625   2 
  -3   7  -4 7.36519 5.38565   2 
   6   6  -4 0.80298 11.0962   2 
   5   6  -4 19.5177 7.65311   2 
   5   6  -4 31.9750 9.37263   2 
  -5  -6   4 7.05891 8.62771   2 
  -5  -6   4 31.4853 9.90326   2 
   4   6  -4 28.8462 7.16424   2 
   4   6  -4 16.8666 6.81830   2 
  -4  -6   4 22.9933 7.59096   2 
  -4  -6   4 19.7791 4.26328   2 
   3   6  -4 32.6416 5.82315   2 
   3   6  -4 24.6591 5.53443   2 
  -3  -6   4 16.9254 5.91570   2 
  -3  -6   4 20.6657 3.75837   2 
   2   6  -4 2.92236 4.70801   2 
  -2  -6   4 5.18604 2.71267   2 
  -2  -6   4 8.57876 4.92704   2 
   1   6  -4 173.533 7.52170   2 
   1   6  -4 174.346 8.69849   2 
  -1  -6   4 192.560 9.34379   2 
  -1  -6   4 176.844 6.42070   2 
   0   6  -4 8.92057 2.53423   2 
   0   6  -4 11.7179 3.75964   2 
  -1   6  -4 97.1782 6.33274   2 
  -1   6  -4 101.487 5.03561   2 
  -2   6  -4 48.5315 4.43323   2 
  -2   6  -4 56.2807 6.07573   2 
  -3   6  -4 6.34797 3.66440   1 
  -3   6  -4 6.59524 3.24901   2 
  -3   6  -4 5.15283 4.12847   2 
   3  -6   4 9.46137 3.52036   1 
  -4   6  -4 112.292 9.33271   2 
  -4   6  -4 100.926 7.91815   1 
  -4   6  -4 103.627 8.55158   2 
   4  -6   4 110.443 8.47764   1 
   6   5  -4 36.0674 8.13480   2 
   6   5  -4 24.0949 4.83246   1 
   6   5  -4 29.2987 11.3112   2 
  -6  -5   4 11.4170 11.0355   2 
  -6  -5   4 7.31080 6.83639   2 
   5   5  -4 22.8979 7.98975   2 
   5   5  -4 14.2824 6.73654   2 
  -5  -5   4 20.4782 5.40469   2 
  -5  -5   4 15.1098 7.77054   2 
   4   5  -4 145.762 9.53809   2 
  -4  -5   4 119.714 7.05110   2 
  -4  -5   4 141.599 11.3888   2 
   3   5  -4 15.4026 4.89517   2 
   3   5  -4 6.40376 3.97816   2 
  -3  -5   4 7.61342 2.63722   2 
  -3  -5   4 17.1273 4.87121   2 
   2   5  -4 21.7046 4.12378   2 
   2   5  -4 28.4738 4.47504   2 
  -2  -5   4 25.3105 6.63504   2 
  -2  -5   4 23.1605 2.77680   2 
   1   5  -4 49.4459 4.41720   2 
   1   5  -4 41.4688 4.69013   2 
  -1  -5   4 40.6893 4.61807   2 
  -1  -5   4 35.7494 3.49660   2 
   0   5  -4 28.7989 3.38168   2 
   0   5  -4 28.8106 3.33329   2 
  -1   5  -4 -1.9044 1.67407   2 
  -1   5  -4 1.75747 2.42816   2 
  -2   5  -4 -1.8012 2.47297   2 
  -2   5  -4 6.82733 2.08159   1 
  -2   5  -4 1.74682 2.01327   2 
  -3   5  -4 63.1986 5.87660   2 
  -3   5  -4 55.3997 4.85447   2 
  -3   5  -4 62.1116 4.98741   1 
   3  -5   4 55.7234 5.32453   1 
  -4   5  -4 6.41946 3.35273   2 
  -4   5  -4 11.3699 5.74440   1 
  -4   5  -4 6.99401 4.83809   2 
   4  -5   4 17.8802 6.80387   1 
  -5   5  -4 4.28329 4.99732   2 
  -5   5  -4 -4.2314 6.03381   2 
  -5   5  -4 3.67296 4.44307   1 
   5  -5   4 9.07001 5.04113   1 
   7   4  -4 3.25258 8.72244   2 
   7   4  -4 -18.170 12.4861   2 
   7   4  -4 7.17456 5.33188   1 
  -7  -4   4 -1.2580 3.48377   1 
  -7  -4   4 17.3354 8.81945   2 
  -7  -4   4 -0.2281 12.3556   2 
   6   4  -4 28.0505 7.55807   2 
   6   4  -4 23.9457 4.59360   1 
   6   4  -4 23.4551 10.2434   2 
  -6  -4   4 26.2589 7.24961   2 
  -6  -4   4 24.2138 3.11597   1 
  -6  -4   4 33.5302 9.25824   2 
   5   4  -4 -2.1831 2.81182   1 
   5   4  -4 -4.9725 6.67782   2 
   5   4  -4 0.55256 5.48763   2 
  -5  -4   4 -0.2614 4.71318   2 
  -5  -4   4 -3.0991 1.80518   1 
  -5  -4   4 1.80788 6.71767   2 
   4   4  -4 -0.8489 5.53819   2 
   4   4  -4 2.30298 2.24845   1 
   4   4  -4 4.76333 3.92566   2 
  -4  -4   4 5.63281 5.62052   2 
  -4  -4   4 4.21709 1.35308   1 
   3   4  -4 6.95122 3.44674   2 
   3   4  -4 5.57866 4.36106   2 
  -3  -4   4 5.44546 4.00215   2 
  -3  -4   4 6.66546 2.67562   2 
   2   4  -4 206.012 8.00422   2 
   2   4  -4 209.598 8.06021   2 
  -2  -4   4 194.714 8.51804   2 
  -2  -4   4 203.743 6.31007   2 
   1   4  -4 2.15425 2.31135   2 
   1   4  -4 0.71036 2.39982   2 
  -1  -4   4 -2.1133 2.48800   2 
  -1  -4   4 0.14623 1.42796   2 
   0   4  -4 135.459 4.80948   2 
   0   4  -4 128.925 4.95777   2 
  -1   4  -4 0.30763 1.60651   2 
  -1   4  -4 -1.3466 1.26898   1 
  -1   4  -4 -1.0726 1.19901   2 
  -2   4  -4 33.4138 3.39445   1 
  -2   4  -4 27.6511 2.72776   2 
  -2   4  -4 40.6996 3.80760   2 
   2  -4   4 29.9104 3.47723   1 
  -3   4  -4 78.4782 4.61013   2 
  -3   4  -4 63.2232 5.39614   2 
  -3   4  -4 84.7349 5.04427   1 
   3  -4   4 77.0162 5.23850   1 
  -4   4  -4 87.9485 5.88584   2 
  -4   4  -4 89.5423 6.07848   1 
  -4   4  -4 86.5916 7.73865   2 
   4  -4   4 89.3884 6.62459   1 
  -5   4  -4 29.2502 4.28281   1 
  -5   4  -4 36.7351 6.54065   2 
  -5   4  -4 29.5736 4.90788   2 
   5  -4   4 30.5475 5.07651   1 
   5  -4   4 21.5866 7.53740   2 
  -6   4  -4 24.0765 6.57512   2 
  -6   4  -4 13.9955 5.22031   1 
  -6   4  -4 30.5350 8.71990   2 
   6  -4   4 10.8986 6.16052   1 
   6  -4   4 21.4632 9.92955   2 
   7   3  -4 2.47060 7.90143   2 
   7   3  -4 1.28185 5.32240   1 
   7   3  -4 17.7393 12.6310   2 
  -7  -3   4 1.87711 3.77629   1 
  -7  -3   4 16.5112 11.0977   2 
  -7  -3   4 20.0878 8.63380   2 
   6   3  -4 15.5362 3.99831   1 
   6   3  -4 4.83902 5.94110   2 
   6   3  -4 14.7936 9.70612   2 
  -6  -3   4 11.9692 8.30747   2 
  -6  -3   4 11.7976 2.94423   1 
  -6  -3   4 27.2835 6.85852   2 
   5   3  -4 8.66723 3.01307   1 
   5   3  -4 8.10097 6.91626   2 
   5   3  -4 2.71888 4.93168   2 
  -5  -3   4 11.4534 2.35695   1 
  -5  -3   4 26.8553 6.81200   2 
  -5  -3   4 17.6143 4.97352   2 
   4   3  -4 9.86843 5.38796   2 
   4   3  -4 8.18507 3.68488   2 
   4   3  -4 12.8195 2.34535   1 
  -4  -3   4 12.7349 3.67459   2 
  -4  -3   4 8.63000 1.63268   1 
  -4  -3   4 1.87884 4.93508   2 
   3   3  -4 4.83137 2.74333   2 
   3   3  -4 0.37727 1.54591   1 
   3   3  -4 7.55157 3.91716   2 
  -3  -3   4 5.93120 3.15522   2 
  -3  -3   4 1.48979 2.06701   2 
  -3  -3   4 3.24259 0.98416   1 
   2   3  -4 8.58875 3.15639   2 
   2   3  -4 6.32600 2.55011   2 
  -2  -3   4 8.67807 1.93788   2 
  -2  -3   4 9.38955 3.12508   2 
   1   3  -4 79.2933 4.46138   2 
   1   3  -4 92.9872 4.30465   2 
  -1  -3   4 73.4982 2.93305   2 
  -1  -3   4 79.3605 4.71230   2 
  -1   3  -4 1.53339 1.00269   2 
  -1   3  -4 0.77210 1.23155   1 
  -2   3  -4 16.2467 2.08898   1 
  -2   3  -4 15.1677 1.63722   2 
  -2   3  -4 13.8769 2.07028   2 
   2  -3   4 15.5955 2.19062   1 
  -3   3  -4 14.1966 2.26418   2 
  -3   3  -4 17.4357 3.25506   2 
  -3   3  -4 13.9687 2.39312   1 
   3  -3   4 17.8744 2.77293   1 
  -4   3  -4 -0.0608 2.28687   2 
  -4   3  -4 0.90665 4.13351   2 
  -4   3  -4 1.17318 2.27860   1 
   4  -3   4 2.36461 1.54315   2 
   4  -3   4 -5.5111 4.43286   2 
   4  -3   4 -0.2633 2.30533   1 
  -5   3  -4 41.5375 6.61393   2 
  -5   3  -4 56.1043 6.67428   2 
  -5   3  -4 40.5373 4.54461   1 
   5  -3   4 57.5571 6.45653   1 
   5  -3   4 34.0046 6.95146   2 
   5  -3   4 35.8600 3.66257   2 
  -6   3  -4 -8.2334 7.93527   2 
  -6   3  -4 6.41456 4.69648   1 
  -6   3  -4 7.95718 6.07594   2 
   6  -3   4 10.3741 5.18296   1 
   6  -3   4 7.38564 2.55781   2 
   6  -3   4 8.04309 8.53272   2 
   7   2  -4 85.3983 14.5689   2 
   7   2  -4 88.9778 9.00007   1 
   7   2  -4 111.547 12.5552   2 
  -7  -2   4 90.4601 6.77177   1 
  -7  -2   4 110.206 13.0373   2 
  -7  -2   4 99.3610 10.1663   2 
   6   2  -4 39.9274 9.99940   2 
   6   2  -4 58.6392 7.02680   2 
   6   2  -4 54.4931 6.51346   1 
  -6  -2   4 48.7898 4.82344   1 
  -6  -2   4 46.9699 7.13621   2 
  -6  -2   4 58.2498 12.5322   2 
   5   2  -4 -3.7403 3.57101   2 
   5   2  -4 -2.2739 6.71750   2 
   5   2  -4 1.98253 2.51736   1 
  -5  -2   4 0.75691 5.51892   2 
  -5  -2   4 -0.2199 1.98330   1 
  -5  -2   4 0.63868 4.14848   2 
   4   2  -4 1.50749 1.85701   1 
   4   2  -4 -1.1888 4.98410   2 
   4   2  -4 5.49089 3.37778   2 
  -4  -2   4 -1.0617 3.86971   2 
  -4  -2   4 -0.2522 1.38107   1 
  -4  -2   4 0.50594 3.25257   2 
   3   2  -4 31.9071 2.70968   1 
   3   2  -4 28.2050 4.76932   2 
   3   2  -4 32.1971 3.57859   2 
  -3  -2   4 31.5152 4.11616   2 
  -3  -2   4 27.8504 1.94303   1 
   2   2  -4 144.006 6.88614   2 
   2   2  -4 139.094 5.94126   2 
   2   2  -4 150.046 4.23379   1 
  -2  -2   4 149.942 3.77913   1 
  -2  -2   4 145.866 5.11537   2 
  -2  -2   4 144.571 6.13862   2 
   1   2  -4 54.7780 1.76415   1 
   1   2  -4 56.9152 3.39307   2 
   1   2  -4 51.1406 4.02481   2 
  -1  -2   4 48.7045 2.11112   1 
   0   2  -4 3.61180 0.99676   1 
  -1   2  -4 0.96064 1.03651   1 
  -2   2  -4 43.3946 2.36371   2 
  -2   2  -4 42.8723 2.95136   1 
   2  -2   4 40.5485 3.01265   1 
  -3   2  -4 137.377 6.51418   2 
  -3   2  -4 138.217 5.55909   1 
  -3   2  -4 136.934 5.11805   2 
   3  -2   4 147.287 5.75917   1 
  -4   2  -4 95.9686 5.05354   1 
  -4   2  -4 91.4264 7.85014   2 
  -4   2  -4 104.915 5.48400   2 
   4  -2   4 102.095 5.48580   1 
   4  -2   4 104.079 7.39184   2 
   4  -2   4 102.762 3.76295   2 
  -5   2  -4 171.895 11.3514   2 
  -5   2  -4 150.825 9.21215   1 
   5  -2   4 163.165 5.60718   2 
   5  -2   4 153.683 8.89029   1 
   5  -2   4 172.840 10.5155   2 
  -6   2  -4 12.1372 4.09781   1 
  -6   2  -4 5.22450 5.23160   2 
  -6   2  -4 22.8788 13.2289   2 
   6  -2   4 9.39609 4.05421   1 
   6  -2   4 5.52197 7.73423   2 
   6  -2   4 10.0830 2.71571   2 
  -7   2  -4 8.90301 7.80679   2 
  -7   2  -4 5.94815 9.53462   2 
  -7   2  -4 7.27000 5.12210   1 
   7  -2   4 2.63751 3.37453   2 
   7  -2   4 8.00347 5.20372   1 
   7  -2   4 2.62056 10.9087   2 
   7   1  -4 1.74247 4.62413   1 
   7   1  -4 6.71787 13.7408   2 
   7   1  -4 1.87903 6.23821   2 
  -7  -1   4 4.80832 9.73580   2 
  -7  -1   4 -0.1495 8.06914   2 
  -7  -1   4 -0.1192 3.86684   1 
   6   1  -4 12.5036 3.61741   1 
   6   1  -4 5.68425 4.57361   2 
   6   1  -4 -2.4536 8.67372   2 
  -6  -1   4 3.21239 6.96699   2 
  -6  -1   4 3.35189 2.76800   1 
  -6  -1   4 13.0446 5.98176   2 
   5   1  -4 -8.7978 6.34997   2 
   5   1  -4 1.01111 3.54944   2 
   5   1  -4 -1.5500 2.40411   1 
  -5  -1   4 -3.2496 3.95037   2 
  -5  -1   4 1.58071 2.09096   1 
  -5  -1   4 3.38537 5.06363   2 
   4   1  -4 6.56104 5.12796   2 
   4   1  -4 2.57439 1.93471   1 
   4   1  -4 1.96789 2.78170   2 
  -4  -1   4 0.97447 1.48596   1 
  -4  -1   4 1.72537 2.87315   2 
  -4  -1   4 1.87133 3.60464   2 
   3   1  -4 145.477 6.07796   2 
   3   1  -4 150.245 8.44304   2 
   3   1  -4 160.623 5.14512   1 
  -3  -1   4 149.760 4.49524   1 
  -3  -1   4 153.543 6.36256   2 
  -3  -1   4 156.851 6.86576   2 
   2   1  -4 6.53784 1.83013   2 
   2   1  -4 8.56011 2.81921   2 
   2   1  -4 6.61794 1.17813   1 
  -2  -1   4 3.15728 1.48955   2 
  -2  -1   4 8.39061 2.19397   2 
  -2  -1   4 5.39784 0.90550   1 
   1   1  -4 198.703 4.69175   1 
   1   1  -4 198.027 5.58231   2 
  -1  -1   4 197.163 5.29601   2 
  -1  -1   4 197.670 4.80207   1 
  -1  -1   4 196.704 5.52684   2 
   0   1  -4 726.068 15.7205   1 
  -1   1  -4 41.8737 2.30874   1 
  -2   1  -4 179.796 5.59374   1 
   2  -1   4 179.563 5.69422   1 
  -3   1  -4 8.46684 1.85765   2 
  -3   1  -4 7.05607 1.69805   1 
  -3   1  -4 9.10377 3.10798   2 
   3  -1   4 8.69473 1.22238   2 
   3  -1   4 11.3382 1.84969   1 
   3  -1   4 5.78857 2.90895   2 
  -4   1  -4 174.366 6.44825   1 
  -4   1  -4 154.596 8.77794   2 
  -4   1  -4 166.615 6.60762   2 
   4  -1   4 164.756 5.27358   2 
   4  -1   4 166.215 6.47792   1 
   4  -1   4 166.368 8.31464   2 
  -5   1  -4 14.9299 2.80101   1 
  -5   1  -4 15.2704 3.96096   2 
   5  -1   4 16.7492 3.11347   1 
   5  -1   4 13.7941 5.51280   2 
  -6   1  -4 242.632 11.4237   2 
  -6   1  -4 236.684 9.32539   1 
  -6   1  -4 232.843 13.6304   2 
   6  -1   4 217.960 9.52703   1 
   6  -1   4 221.187 13.4093   2 
   6  -1   4 245.547 8.24745   2 
  -7   1  -4 170.328 16.1663   2 
  -7   1  -4 148.745 13.3827   2 
  -7   1  -4 158.509 8.55276   1 
   7  -1   4 168.666 9.64611   1 
   7  -1   4 161.441 8.20310   2 
   7  -1   4 159.271 16.4459   2 
   7   0  -4 15.3468 5.94797   2 
   7   0  -4 5.69670 12.3276   2 
   7   0  -4 9.97265 4.95872   1 
  -7   0   4 21.1610 13.1863   2 
  -7   0   4 1.37058 3.58401   1 
  -7   0   4 -0.1513 7.72699   2 
   6   0  -4 37.1668 9.73802   2 
   6   0  -4 29.7661 4.34550   1 
   6   0  -4 27.7735 4.70856   2 
  -6   0   4 19.5983 6.14393   2 
  -6   0   4 25.5130 3.43172   1 
  -6   0   4 28.8765 6.97533   2 
   5   0  -4 52.9381 5.94647   2 
   5   0  -4 41.8303 4.51518   1 
   5   0  -4 45.6582 7.85360   2 
  -5   0   4 43.8627 3.94335   1 
  -5   0   4 54.4706 6.36947   2 
  -5   0   4 49.6748 5.52020   2 
   4   0  -4 36.0746 5.82404   2 
   4   0  -4 36.3785 3.49324   1 
   4   0  -4 33.0964 3.63379   2 
  -4   0   4 38.7599 4.73163   2 
  -4   0   4 39.6539 4.35009   2 
  -4   0   4 36.5840 2.81727   1 
   3   0  -4 132.124 5.43794   2 
   3   0  -4 110.411 7.29404   2 
   3   0  -4 138.682 4.78148   1 
  -3   0   4 138.886 4.26681   1 
  -3   0   4 136.482 6.09467   2 
  -3   0   4 131.258 5.85515   2 
   2   0  -4 137.325 6.12406   2 
   2   0  -4 139.450 4.18471   1 
   2   0  -4 137.017 4.80708   2 
  -2   0   4 135.839 3.79917   1 
  -2   0   4 134.005 5.23698   2 
   1   0  -4 40.0396 1.67163   1 
   1   0  -4 36.1627 3.02242   2 
   1   0  -4 40.2015 2.34803   2 
  -1   0   4 38.7040 2.48803   2 
  -1   0   4 38.6763 1.58993   1 
  -1   0   4 36.1858 2.40695   2 
   0   0  -4 102.049 2.98270   1 
  -2   0  -4 396.374 9.91612   1 
  -2   0  -4 381.394 9.36546   2 
  -2   0  -4 394.445 10.1177   2 
  -3   0  -4 16.9928 2.26564   2 
  -3   0  -4 20.6046 2.52497   1 
  -3   0  -4 19.3022 3.35012   2 
   3   0   4 16.6974 1.86209   2 
   3   0   4 18.0495 2.18387   1 
   3   0   4 16.4328 3.06111   2 
  -4   0  -4 14.9895 2.90287   2 
  -4   0  -4 12.0500 2.23872   1 
   4   0   4 15.3427 2.24743   2 
   4   0   4 14.0258 3.76776   2 
   4   0   4 13.8003 2.44402   1 
  -5   0  -4 8.38895 3.62310   2 
  -5   0  -4 5.81467 2.42969   1 
  -5   0  -4 15.1142 5.54113   2 
   5   0   4 13.9703 2.56760   1 
   5   0   4 11.8502 4.99430   2 
   5   0   4 13.1500 2.50866   2 
  -6   0  -4 45.3704 5.11084   1 
  -6   0  -4 38.1819 7.49982   2 
   6   0   4 50.4281 5.68429   1 
   6   0   4 46.3813 7.67482   2 
   6   0   4 55.0524 5.70000   2 
  -7   0  -4 0.23528 3.97690   1 
  -7   0  -4 10.9143 9.65495   2 
  -7   0  -4 14.0707 7.04807   2 
   7   0   4 0.72370 4.28656   1 
   7   0   4 8.59747 9.31470   2 
   7   0   4 3.03889 4.16812   2 
   7  -1  -4 69.7326 7.34376   2 
   7  -1  -4 75.1864 14.8196   2 
   7  -1  -4 55.5791 6.01096   1 
  -7   1   4 65.1921 6.16488   1 
  -7   1   4 65.7397 10.5530   2 
  -7   1   4 73.1083 9.73984   2 
   6  -1  -4 90.6496 11.1917   2 
   6  -1  -4 83.4816 6.04206   1 
   6  -1  -4 70.9052 7.70246   2 
  -6   1   4 75.1454 5.16155   1 
  -6   1   4 80.5208 8.18523   2 
  -6   1   4 87.3216 8.79652   2 
   5  -1  -4 61.0881 4.85992   1 
   5  -1  -4 67.2570 5.81762   2 
   5  -1  -4 63.5682 8.44264   2 
  -5   1   4 65.5366 7.27910   2 
  -5   1   4 57.8460 4.08372   1 
  -5   1   4 71.5719 6.82006   2 
   4  -1  -4 2.30655 5.04430   2 
   4  -1  -4 0.76638 2.37678   2 
   4  -1  -4 1.97183 1.74243   1 
  -4   1   4 -0.6880 3.27445   2 
  -4   1   4 0.99707 1.36908   1 
  -4   1   4 -2.4897 2.73123   2 
   3  -1  -4 588.653 16.4250   2 
   3  -1  -4 587.647 14.4828   2 
   3  -1  -4 590.366 14.2894   1 
  -3   1   4 604.801 13.7487   1 
  -3   1   4 582.010 15.0024   2 
  -3   1   4 597.635 15.3708   2 
   2  -1  -4 0.43148 2.33306   2 
   2  -1  -4 0.25149 1.04686   1 
   2  -1  -4 1.46834 1.31537   2 
  -2   1   4 -0.3495 1.48575   2 
  -2   1   4 0.14870 0.80266   1 
  -2   1   4 2.59418 1.80969   2 
   1  -1  -4 1.13155 0.73344   1 
   1  -1  -4 0.54241 0.93156   2 
   1  -1  -4 0.53422 1.57406   2 
  -1   1   4 -0.9954 1.05472   2 
  -1   1   4 0.73986 0.57894   1 
   0  -1  -4 10.9287 1.18794   2 
   0  -1  -4 9.78270 0.99143   1 
   0  -1  -4 10.2474 1.05722   2 
   0   1   4 11.0262 1.24915   2 
   0   1   4 8.83074 1.07839   1 
   0   1   4 9.72367 0.97776   2 
  -1  -1  -4 1181.39 24.8730   2 
   1   1   4 1168.84 24.7621   2 
   1   1   4 1165.55 24.9375   2 
  -2  -1  -4 464.948 11.1635   2 
  -2  -1  -4 466.896 11.9382   2 
  -2  -1  -4 462.684 11.4768   1 
   2   1   4 471.128 11.0827   2 
   2   1   4 471.985 11.4082   2 
  -3  -1  -4 174.447 6.11454   2 
  -3  -1  -4 180.925 7.58065   2 
  -3  -1  -4 178.989 5.95508   1 
   3   1   4 181.695 5.79360   2 
   3   1   4 177.446 6.01221   1 
   3   1   4 168.875 6.68499   2 
  -4  -1  -4 0.98160 1.50345   1 
  -4  -1  -4 1.62917 2.52375   2 
  -4  -1  -4 5.71038 4.17931   2 
   4   1   4 0.55766 1.92897   2 
   4   1   4 2.31060 1.64562   1 
   4   1   4 -0.4027 2.74322   2 
  -5  -1  -4 27.6977 4.35278   2 
  -5  -1  -4 39.1549 6.33495   2 
  -5  -1  -4 26.7239 3.09893   1 
   5   1   4 29.7468 3.42948   1 
   5   1   4 31.5861 3.71306   2 
  -6  -1  -4 2.07727 5.13021   2 
  -6  -1  -4 4.05393 2.61960   1 
  -6  -1  -4 12.3338 7.52876   2 
   6   1   4 1.12346 2.76270   1 
   6   1   4 8.38939 3.42856   2 
  -7  -1  -4 -0.3111 6.25378   2 
  -7  -1  -4 3.32836 9.61740   2 
  -7  -1  -4 3.53560 3.99825   1 
   7   1   4 -1.5656 4.17544   1 
   7   1   4 -2.5744 4.67864   2 
   7   1   4 -2.7589 11.6975   2 
  -8  -1  -4 18.9700 5.77497   1 
  -8  -1  -4 10.0056 9.64279   2 
  -8  -1  -4 22.4971 13.5665   2 
   8   1   4 38.1745 14.1169   2 
   8   1   4 14.7483 5.94882   1 
   8   1   4 23.0110 6.66564   2 
   7  -2  -4 12.6169 14.3281   2 
   7  -2  -4 8.67002 4.69807   1 
   7  -2  -4 25.0257 5.63144   2 
  -7   2   4 19.6541 9.30411   2 
  -7   2   4 16.7398 4.00125   1 
  -7   2   4 8.04932 8.44022   2 
   6  -2  -4 118.073 7.31848   1 
   6  -2  -4 127.902 8.25032   2 
   6  -2  -4 123.295 12.6960   2 
  -6   2   4 134.854 11.7941   2 
  -6   2   4 113.146 6.14798   1 
  -6   2   4 127.493 11.5053   2 
   5  -2  -4 107.882 7.96469   1 
   5  -2  -4 122.558 13.2785   2 
   5  -2  -4 136.711 6.84629   2 
  -5   2   4 135.040 9.16285   2 
  -5   2   4 129.282 8.57078   2 
  -5   2   4 95.2115 8.16415   1 
   4  -2  -4 231.162 7.78308   2 
   4  -2  -4 231.014 11.7512   2 
   4  -2  -4 240.935 7.90493   1 
  -4   2   4 213.500 8.90994   2 
  -4   2   4 237.251 7.06230   1 
  -4   2   4 236.630 9.33590   2 
   3  -2  -4 233.046 7.07188   2 
   3  -2  -4 223.114 9.57007   2 
   3  -2  -4 227.731 7.02595   1 
  -3   2   4 235.012 7.99564   2 
  -3   2   4 232.152 6.43522   1 
  -3   2   4 224.818 7.72567   2 
   2  -2  -4 277.743 7.30009   1 
   2  -2  -4 273.893 7.32237   2 
   2  -2  -4 264.692 8.85531   2 
  -2   2   4 275.109 7.83980   2 
  -2   2   4 271.227 6.79820   1 
  -2   2   4 263.268 7.69835   2 
   1  -2  -4 216.694 5.71613   2 
   1  -2  -4 216.269 5.46449   1 
   1  -2  -4 218.214 6.45595   2 
  -1   2   4 211.040 5.82257   2 
  -1   2   4 213.036 5.27530   1 
  -1   2   4 213.136 5.88454   2 
   0  -2  -4 260.788 6.18099   1 
   0  -2  -4 266.187 6.64931   2 
   0  -2  -4 266.211 6.64533   2 
   0   2   4 265.120 6.50793   2 
   0   2   4 264.012 6.54746   2 
   0   2   4 267.670 6.38742   1 
  -1  -2  -4 208.102 5.52552   2 
  -1  -2  -4 203.680 5.46793   1 
   1   2   4 213.596 5.71004   2 
  -2  -2  -4 4.27263 2.47573   2 
  -2  -2  -4 2.69627 1.57529   2 
  -2  -2  -4 4.89545 1.29522   1 
   2   2   4 1.78044 1.57202   2 
  -3  -2  -4 88.5054 4.02455   1 
  -3  -2  -4 84.2970 6.35067   2 
  -3  -2  -4 93.1933 4.77695   2 
   3   2   4 88.5309 5.90083   2 
   3   2   4 91.3945 4.50206   2 
  -4  -2  -4 6.75783 2.72742   2 
  -4  -2  -4 4.19495 4.19020   2 
  -4  -2  -4 4.11220 1.84625   1 
   4   2   4 8.49917 3.75180   2 
   4   2   4 3.13653 2.31082   2 
   4   2   4 3.77876 1.75285   1 
  -5  -2  -4 -1.1402 3.64302   2 
  -5  -2  -4 0.97685 2.10011   1 
  -5  -2  -4 -0.5480 6.03756   2 
   5   2   4 4.14819 4.67555   2 
   5   2   4 2.82892 2.20258   1 
   5   2   4 1.51608 3.09087   2 
  -6  -2  -4 17.4804 5.45253   2 
  -6  -2  -4 23.3278 8.29481   2 
  -6  -2  -4 16.3397 3.47887   1 
   6   2   4 6.24925 6.95566   2 
   6   2   4 13.0244 3.27990   1 
   6   2   4 8.41856 4.86115   2 
  -7  -2  -4 31.8865 4.93977   1 
  -7  -2  -4 35.7531 8.11621   2 
  -7  -2  -4 40.6862 10.6013   2 
   7   2   4 39.4471 6.70139   2 
   7   2   4 23.3736 10.0662   2 
   7   2   4 38.2609 5.41654   1 
  -8  -2  -4 -1.2141 5.75170   1 
  -8  -2  -4 7.42193 9.76818   2 
  -8  -2  -4 2.03857 14.0093   2 
   8   2   4 5.82879 6.35267   1 
   8   2   4 2.50774 7.41280   2 
   8   2   4 15.9694 13.5351   2 
   7  -3  -4 -11.039 15.9099   2 
   7  -3  -4 -9.2727 5.16747   1 
   7  -3  -4 3.10775 5.50240   2 
  -7   3   4 -4.0318 9.87102   2 
  -7   3   4 1.84634 3.68584   1 
  -7   3   4 -5.1844 9.43885   2 
   6  -3  -4 1.80167 3.57794   1 
   6  -3  -4 -14.754 10.4354   2 
   6  -3  -4 8.06533 4.11914   2 
  -6   3   4 -1.3713 2.72068   1 
  -6   3   4 -6.6286 6.77011   2 
  -6   3   4 7.50573 6.12148   2 
   5  -3  -4 11.6827 8.22643   2 
   5  -3  -4 20.3019 3.58076   2 
   5  -3  -4 21.6258 3.82723   1 
  -5   3   4 20.9888 5.13200   2 
  -5   3   4 16.2704 5.23000   2 
  -5   3   4 17.9173 2.70889   1 
   4  -3  -4 133.018 10.9384   2 
   4  -3  -4 140.411 6.14949   1 
   4  -3  -4 137.703 5.96543   2 
  -4   3   4 135.741 5.23774   1 
  -4   3   4 135.416 7.88283   2 
  -4   3   4 142.788 7.49625   2 
   3  -3  -4 264.944 8.15664   1 
   3  -3  -4 271.959 7.99461   2 
   3  -3  -4 265.014 10.7308   2 
  -3   3   4 279.863 7.44173   1 
  -3   3   4 269.853 8.94605   2 
  -3   3   4 284.265 9.00087   2 
   2  -3  -4 388.275 9.71149   1 
   2  -3  -4 382.674 9.70607   2 
   2  -3  -4 376.381 11.2761   2 
  -2   3   4 376.548 9.07546   1 
  -2   3   4 369.092 10.0708   2 
  -2   3   4 376.875 10.0292   2 
   1  -3  -4 1566.94 33.0821   1 
   1  -3  -4 1610.40 33.5675   2 
   1  -3  -4 1500.56 33.8460   2 
  -1   3   4 1552.47 33.5091   2 
  -1   3   4 1514.90 32.7628   1 
  -1   3   4 1568.96 33.4639   2 
   0  -3  -4 322.318 8.58061   2 
   0  -3  -4 339.007 8.47328   2 
   0  -3  -4 332.544 7.69447   1 
   0   3   4 335.602 8.35856   2 
   0   3   4 340.727 7.87212   1 
   0   3   4 338.703 8.45964   2 
  -1  -3  -4 19.9960 1.67060   1 
  -1  -3  -4 20.8855 2.46501   2 
   1   3   4 20.8409 2.54934   2 
   1   3   4 22.0991 2.44522   2 
  -2  -3  -4 22.0438 3.26898   2 
  -2  -3  -4 19.5441 2.30675   2 
  -2  -3  -4 20.9322 2.33718   1 
   2   3   4 21.5347 2.54506   2 
  -3  -3  -4 413.080 12.8106   2 
  -3  -3  -4 398.753 10.8771   2 
  -3  -3  -4 409.834 10.5102   1 
   3   3   4 384.653 11.8454   2 
   3   3   4 392.709 11.2797   2 
  -4  -3  -4 13.6137 3.33325   2 
  -4  -3  -4 15.8528 2.40738   1 
  -4  -3  -4 19.4010 5.16942   2 
   4   3   4 15.1905 4.32834   2 
   4   3   4 13.4664 3.36039   2 
  -5  -3  -4 49.9504 7.60531   2 
  -5  -3  -4 60.5863 4.88021   1 
  -5  -3  -4 48.9277 5.28689   2 
   5   3   4 54.4804 5.46218   2 
   5   3   4 54.2266 4.78816   1 
   5   3   4 54.0480 6.47584   2 
  -6  -3  -4 -2.4819 5.01359   1 
  -6  -3  -4 3.62385 8.94785   2 
  -6  -3  -4 2.16750 5.13699   2 
   6   3   4 2.32489 7.12545   2 
  -7  -3  -4 -3.8569 7.85123   2 
  -7  -3  -4 0.53113 10.8093   2 
  -7  -3  -4 2.20434 4.20733   1 
   7   3   4 -9.3703 5.86009   2 
   7   3   4 0.27932 4.45566   1 
   7   3   4 10.2700 9.44800   2 
  -8  -3  -4 65.8279 11.8002   2 
  -8  -3  -4 103.495 17.2087   2 
  -8  -3  -4 60.5830 7.33358   1 
   8   3   4 72.6524 8.52251   1 
   8   3   4 79.0554 10.5606   2 
   8   3   4 91.9834 15.2776   2 
   6  -4  -4 10.0616 13.0585   2 
   6  -4  -4 3.22415 4.22136   2 
   6  -4  -4 4.36307 4.53835   1 
  -6   4   4 4.88396 7.62833   2 
  -6   4   4 -2.6717 3.31879   1 
   5  -4  -4 42.7592 10.1732   2 
   5  -4  -4 27.8320 4.38145   1 
  -5   4   4 29.4109 3.38113   1 
  -5   4   4 26.4540 5.42933   2 
  -5   4   4 26.5618 5.87799   2 
   4  -4  -4 9.10354 6.65826   2 
   4  -4  -4 7.40042 2.77988   1 
   4  -4  -4 4.12492 2.62261   2 
  -4   4   4 0.34056 3.59420   2 
  -4   4   4 1.05313 3.78807   2 
  -4   4   4 4.08084 2.00029   1 
   3  -4  -4 2.04925 5.01543   2 
   3  -4  -4 1.04245 1.85922   2 
   3  -4  -4 -2.0405 1.94333   1 
  -3   4   4 2.47415 2.63617   2 
  -3   4   4 -2.9931 1.43401   1 
  -3   4   4 0.71320 2.62773   2 
   2  -4  -4 129.596 5.04403   2 
   2  -4  -4 126.376 7.29551   2 
   2  -4  -4 134.778 5.18293   1 
  -2   4   4 136.719 5.54546   2 
  -2   4   4 134.929 5.51890   2 
  -2   4   4 129.149 4.18142   1 
   1  -4  -4 71.5037 3.90224   2 
   1  -4  -4 77.0783 3.36905   1 
   1  -4  -4 70.4889 4.74769   2 
  -1   4   4 73.1291 2.68424   1 
  -1   4   4 76.9122 3.75573   2 
  -1   4   4 75.8410 3.82892   2 
   0  -4  -4 367.463 10.1468   2 
   0  -4  -4 378.743 8.71194   1 
   0  -4  -4 375.557 9.77711   2 
   0   4   4 375.295 9.60977   2 
   0   4   4 368.793 9.67502   2 
   0   4   4 373.626 8.74778   1 
  -1  -4  -4 494.550 12.0082   2 
  -1  -4  -4 484.422 10.8536   1 
   1   4   4 482.072 12.2899   2 
   1   4   4 488.775 12.2265   2 
  -2  -4  -4 101.499 4.65344   2 
  -2  -4  -4 93.7781 3.53973   1 
  -2  -4  -4 89.2748 6.51725   2 
   2   4   4 93.1270 4.94101   2 
   2   4   4 89.9324 5.25201   2 
  -3  -4  -4 233.369 8.08679   2 
  -3  -4  -4 248.252 7.33260   1 
  -3  -4  -4 264.301 10.9492   2 
   3   4   4 240.571 9.33287   2 
   3   4   4 251.041 8.88617   2 
  -4  -4  -4 -1.9235 5.14408   2 
  -4  -4  -4 3.42850 2.16709   1 
  -4  -4  -4 -1.9480 3.02955   2 
   4   4   4 -0.9132 3.31531   2 
   4   4   4 0.98400 4.11552   2 
  -5  -4  -4 1.33194 2.68491   1 
  -5  -4  -4 6.39867 6.82601   2 
  -5  -4  -4 0.43319 4.46096   2 
   5   4   4 -0.0168 5.69742   2 
   5   4   4 1.06663 4.21139   2 
  -6  -4  -4 21.7107 6.59193   2 
  -6  -4  -4 12.8535 3.75047   1 
  -6  -4  -4 12.9303 9.53802   2 
   6   4   4 7.47614 9.66351   2 
   6   4   4 23.5905 7.61445   2 
  -7  -4  -4 -17.802 12.0609   2 
  -7  -4  -4 6.50215 10.3304   2 
  -7  -4  -4 1.64724 4.46997   1 
   7   4   4 17.1431 9.73226   2 
   7   4   4 1.58294 7.48677   2 
   7   4   4 3.43247 4.56181   1 
   6  -5  -4 2.99873 6.11109   1 
   6  -5  -4 12.9500 15.8633   2 
   6  -5  -4 12.0183 5.21484   2 
  -6   5   4 -5.0361 4.04360   1 
  -6   5   4 3.08774 8.16303   2 
  -6   5   4 -0.6499 8.22881   2 
   5  -5  -4 -2.9458 3.46616   2 
   5  -5  -4 -10.806 10.9005   2 
   5  -5  -4 -0.0756 4.17614   1 
  -5   5   4 3.30400 5.85418   2 
  -5   5   4 10.8683 5.83552   2 
  -5   5   4 -4.1103 2.94084   1 
   4  -5  -4 -1.2661 3.16482   1 
   4  -5  -4 -9.5597 7.68886   2 
  -4   5   4 -0.2195 2.33862   1 
  -4   5   4 0.28832 3.99442   2 
  -4   5   4 1.95652 4.24504   2 
   3  -5  -4 22.6249 3.27928   2 
   3  -5  -4 18.8406 3.17894   1 
   3  -5  -4 15.1614 6.34376   2 
  -3   5   4 22.8915 3.57359   2 
  -3   5   4 24.0972 3.89549   2 
  -3   5   4 17.1457 2.28149   1 
   2  -5  -4 237.108 10.1331   2 
   2  -5  -4 236.390 7.87032   2 
   2  -5  -4 235.124 7.59334   1 
  -2   5   4 228.270 7.98989   2 
  -2   5   4 236.218 7.95574   2 
  -2   5   4 240.450 6.44268   1 
   1  -5  -4 61.3836 3.55064   1 
   1  -5  -4 60.2444 4.29050   2 
   1  -5  -4 64.8633 5.70607   2 
  -1   5   4 61.0871 3.98119   2 
  -1   5   4 57.1333 4.10575   2 
  -1   5   4 60.8370 2.60520   1 
   0  -5  -4 47.3347 4.63801   2 
   0  -5  -4 47.4303 4.38708   2 
   0  -5  -4 47.0384 2.62333   1 
   0   5   4 45.1092 3.70583   2 
   0   5   4 49.0571 4.01542   2 
   0   5   4 46.6704 2.49337   1 
  -1  -5  -4 6.50316 3.48775   2 
  -1  -5  -4 6.74945 1.10054   1 
  -1  -5  -4 5.51146 2.40952   2 
   1   5   4 9.73334 2.57101   2 
   1   5   4 6.21319 2.22535   2 
  -2  -5  -4 57.1259 7.00586   2 
  -2  -5  -4 53.3623 2.57283   1 
  -2  -5  -4 57.5031 4.56909   2 
   2   5   4 50.7214 5.02511   2 
   2   5   4 62.5801 4.78597   2 
  -3  -5  -4 45.0470 5.38851   2 
  -3  -5  -4 42.6977 3.35923   1 
  -3  -5  -4 44.8580 6.57981   2 
   3   5   4 32.8500 4.17565   2 
  -4  -5  -4 7.27202 3.87459   2 
  -4  -5  -4 9.93214 5.82818   2 
  -4  -5  -4 10.2284 2.54153   1 
   4   5   4 12.4214 5.13538   2 
   4   5   4 9.92493 4.42094   2 
  -5  -5  -4 -1.5467 4.35812   2 
  -5  -5  -4 6.22240 7.90831   2 
  -5  -5  -4 3.83404 2.97607   1 
   5   5   4 -5.5917 5.91206   2 
   5   5   4 2.68235 5.02804   2 
  -6  -5  -4 -10.146 5.63976   2 
  -6  -5  -4 -4.3430 9.58274   2 
  -6  -5  -4 -5.7398 3.49620   1 
   6   5   4 7.36414 10.8845   2 
   6   5   4 14.9670 8.51008   2 
  -7  -5  -4 -10.650 8.57371   2 
  -7  -5  -4 0.55268 13.9762   2 
  -7  -5  -4 0.34559 5.38607   1 
   7   5   4 3.34822 8.69857   2 
   7   5   4 20.2119 11.3510   2 
   5  -6  -4 16.1650 5.47948   2 
   5  -6  -4 0.66747 13.5748   2 
   5  -6  -4 22.2832 6.04694   1 
  -5   6   4 13.1940 3.78691   1 
  -5   6   4 18.0802 7.20171   2 
  -5   6   4 18.6338 6.80714   2 
   4  -6  -4 5.72261 4.19738   2 
   4  -6  -4 -4.3564 3.85281   1 
   4  -6  -4 1.17020 9.38411   2 
  -4   6   4 -3.1667 2.48084   1 
  -4   6   4 1.75276 4.89478   2 
   3  -6  -4 11.3163 3.84715   1 
   3  -6  -4 14.6203 3.85590   2 
   3  -6  -4 21.6674 7.71905   2 
  -3   6   4 10.8282 3.89412   2 
  -3   6   4 11.4615 3.97346   2 
  -3   6   4 8.72679 2.21369   1 
   2  -6  -4 224.470 11.4228   2 
   2  -6  -4 229.122 8.98880   2 
   2  -6  -4 229.117 8.20064   1 
  -2   6   4 230.281 6.50213   1 
  -2   6   4 226.522 8.75520   2 
  -2   6   4 231.508 8.26563   2 
   1  -6  -4 4.34681 2.24343   1 
   1  -6  -4 8.61811 3.07630   2 
   1  -6  -4 8.84681 4.03455   2 
  -1   6   4 6.19100 2.58022   2 
  -1   6   4 6.68115 2.67080   2 
  -1   6   4 7.44953 1.45558   1 
   0  -6  -4 -2.1665 3.15634   2 
   0  -6  -4 1.47741 1.82947   1 
   0   6   4 2.19192 2.68366   2 
   0   6   4 -0.1976 1.57087   1 
   0   6   4 4.38194 2.61403   2 
  -1  -6  -4 22.7369 5.04380   2 
  -1  -6  -4 19.8876 3.38847   2 
  -1  -6  -4 23.6834 2.37021   1 
   1   6   4 20.0683 3.42575   2 
   1   6   4 22.1962 3.51195   2 
  -2  -6  -4 9.42909 1.37075   1 
  -2  -6  -4 10.9773 5.37008   2 
  -2  -6  -4 13.5051 3.08864   2 
  -2  -6  -4 13.0219 1.98906   1 
   2   6   4 11.8373 3.51052   2 
   2   6   4 11.3446 3.51485   2 
  -3  -6  -4 -0.0164 1.86319   1 
  -3  -6  -4 1.55699 1.59822   1 
  -3  -6  -4 1.72760 3.19732   2 
  -3  -6  -4 -0.3853 6.47477   2 
   3   6   4 -3.7351 3.55427   2 
   3   6   4 0.07855 3.94351   2 
  -4  -6  -4 25.4415 3.05452   1 
  -4  -6  -4 22.7763 7.82872   2 
  -4  -6  -4 22.8540 4.76014   2 
   4   6   4 16.4501 5.21872   2 
  -5  -6  -4 -3.4160 5.16030   2 
  -5  -6  -4 8.89287 3.47864   1 
  -5  -6  -4 8.66236 9.04651   2 
   5   6   4 9.31527 6.25248   2 
   5   6   4 -1.0147 7.15801   2 
  -6  -6  -4 41.6934 7.79792   2 
  -6  -6  -4 45.6569 12.9854   2 
  -6  -6  -4 37.0266 5.01340   1 
   6   6   4 42.8151 9.83351   2 
   6   6   4 45.9762 8.99251   2 
  -7  -6  -4 -29.097 22.4170   2 
  -7  -6  -4 4.55469 5.70702   1 
  -7  -6  -4 -3.4242 8.59712   2 
   7   6   4 -10.943 12.4440   2 
   7   6   4 -3.3497 10.0088   2 
   4  -7  -4 -4.3837 5.34548   2 
   4  -7  -4 -11.121 5.04140   1 
   4  -7  -4 1.48745 12.0886   2 
  -4   7   4 -6.8041 2.90621   1 
  -4   7   4 -1.2020 5.74900   2 
  -4   7   4 5.80294 6.23882   2 
   3  -7  -4 77.2937 10.7206   2 
   3  -7  -4 71.5489 9.33145   1 
   3  -7  -4 86.2794 8.24633   2 
  -3   7   4 68.0578 6.58356   2 
  -3   7   4 76.3773 5.95649   1 
  -3   7   4 97.7353 7.83597   2 
   2  -7  -4 8.52431 6.93350   2 
   2  -7  -4 8.22391 4.31747   2 
   2  -7  -4 7.54734 3.61058   1 
  -2   7   4 6.55062 3.88848   2 
  -2   7   4 5.57451 3.82109   2 
  -2   7   4 10.6764 2.03557   1 
   1  -7  -4 0.00113 2.72241   1 
   1  -7  -4 3.57077 5.40612   2 
  -1   7   4 -1.1060 1.79702   1 
  -1   7   4 1.32602 3.07509   2 
  -1   7   4 -0.6861 3.55427   2 
   0  -7  -4 298.320 8.51674   1 
   0  -7  -4 273.774 10.9639   2 
   0   7   4 306.755 8.03041   1 
   0   7   4 290.327 10.1017   2 
   0   7   4 294.932 10.6208   2 
  -1  -7  -4 6.38909 3.93294   2 
  -1  -7  -4 -7.5527 5.82918   2 
   1   7   4 2.77746 3.54040   2 
   1   7   4 -4.3980 3.13701   2 
  -2  -7  -4 -2.0447 6.11687   2 
  -2  -7  -4 1.48123 3.80957   2 
   2   7   4 7.83205 4.16585   2 
   2   7   4 -1.9382 3.85759   2 
  -3  -7  -4 9.78762 8.49562   2 
  -3  -7  -4 3.01621 4.33700   2 
   3   7   4 -2.7349 4.71979   2 
   3   7   4 -3.9205 4.90763   2 
  -4  -7  -4 111.416 11.8657   2 
  -4  -7  -4 115.482 8.93954   2 
   4   7   4 93.5895 11.2032   2 
   4   7   4 99.7574 10.6609   2 
  -5  -7  -4 -1.4268 3.44329   1 
  -5  -7  -4 5.35876 5.90687   2 
  -5  -7  -4 6.40885 3.63783   1 
  -5  -7  -4 13.1029 21.3091   2 
   5   7   4 14.2353 7.76346   2 
  -6  -7  -4 4.27111 13.8137   2 
  -6  -7  -4 5.35667 4.98890   1 
  -6  -7  -4 8.07812 7.51747   2 
   6   7   4 -2.5432 9.65364   2 
   3  -8  -4 1.60261 5.30809   1 
   3  -8  -4 2.39060 6.59100   2 
   3  -8  -4 -10.195 12.2656   2 
  -3   8   4 4.14304 3.02403   1 
  -3   8   4 -3.2990 5.79344   2 
  -3   8   4 10.4902 6.32834   2 
   2  -8  -4 1.19271 9.16922   2 
   2  -8  -4 7.80038 4.20325   1 
   2  -8  -4 9.80514 6.74072   2 
  -2   8   4 -6.8038 4.55621   2 
  -2   8   4 -4.5750 5.03818   2 
  -2   8   4 5.19487 2.43807   1 
   1  -8  -4 12.4604 3.76168   1 
   1  -8  -4 17.7496 7.52741   2 
  -1   8   4 13.2386 4.98953   2 
  -1   8   4 10.2463 4.59279   2 
  -1   8   4 15.9194 2.73617   1 
   0  -8  -4 31.6979 7.86244   2 
   0  -8  -4 33.4754 6.70189   2 
   0   8   4 31.6918 5.56838   2 
   0   8   4 43.9967 5.12671   2 
  -1  -8  -4 20.5865 5.51836   2 
  -1  -8  -4 -1.4655 7.78958   2 
   1   8   4 19.3435 4.81934   2 
   1   8   4 23.0467 5.07183   2 
  -2  -8  -4 56.0429 9.76060   2 
  -2  -8  -4 44.8709 6.22813   2 
   2   8   4 57.2696 6.68824   2 
   2   8   4 71.0607 8.55883   2 
  -3  -8  -4 40.2099 10.8733   2 
  -3  -8  -4 31.7018 6.07268   2 
   3   8   4 25.4810 7.06786   2 
   3   8   4 35.4774 6.17453   2 
  -4  -8  -4 187.872 21.5068   2 
  -4  -8  -4 170.304 11.3126   2 
   4   8   4 153.059 14.2227   2 
   4   8   4 200.713 13.1353   2 
  -5  -8  -4 10.9046 7.55450   2 
  -5  -8  -4 -5.0386 14.5255   2 
   5   8   4 -10.487 8.63376   2 
   5   8   4 17.7081 12.0590   2 
   1  -9  -4 5.60265 10.1393   2 
   1  -9  -4 16.0568 10.3583   2 
  -1   9   4 11.3765 6.18181   2 
  -1   9   4 17.0051 7.40911   2 
   0  -9  -4 0.67279 8.22117   2 
   0  -9  -4 -15.010 10.1636   2 
   0   9   4 12.7829 6.35590   2 
   0   9   4 -2.3919 5.07960   2 
  -1  -9  -4 -1.0454 6.84142   2 
  -1  -9  -4 6.42318 11.2746   2 
   1   9   4 -2.5209 5.55284   2 
   1   9   4 11.7649 6.82725   2 
  -2  -9  -4 40.8726 7.11631   2 
  -2  -9  -4 -1.4397 11.6530   2 
   2   9   4 29.2266 7.76211   2 
   2   9   4 12.9030 5.93321   2 
  -3  -9  -4 27.4921 7.43988   2 
  -3  -9  -4 28.5125 13.9377   2 
   3   9   4 26.2348 8.95735   2 
   3   9   4 34.3185 7.71931   2 
   4   7  -5 46.7159 9.68653   2 
   4   7  -5 43.9637 9.28880   2 
  -4  -7   5 55.8182 9.07901   2 
  -4  -7   5 31.9886 5.26613   2 
   3   7  -5 -5.0253 7.53601   2 
  -3  -7   5 2.62549 7.39749   2 
  -3  -7   5 1.24745 4.00332   2 
   2   7  -5 21.9325 6.78745   2 
   2   7  -5 10.7824 4.85525   2 
   1   7  -5 51.6403 6.09059   2 
   1   7  -5 79.5990 7.60093   2 
   0   7  -5 9.87059 5.28719   2 
   0   7  -5 9.78952 3.17617   2 
  -1   7  -5 -3.9794 2.69347   2 
  -1   7  -5 -5.2680 4.68350   2 
  -2   7  -5 -2.4192 3.25201   2 
  -2   7  -5 -4.8512 5.16100   2 
   5   6  -5 5.92515 9.45648   2 
   5   6  -5 0.21897 7.93419   2 
  -5  -6   5 4.82372 5.25326   2 
  -5  -6   5 15.3203 9.63834   2 
   4   6  -5 27.9305 7.15562   2 
   4   6  -5 37.4468 7.65213   2 
  -4  -6   5 30.5083 4.54729   2 
  -4  -6   5 33.4267 7.24269   2 
   3   6  -5 -4.2700 5.50147   2 
   3   6  -5 1.77078 5.54688   2 
  -3  -6   5 5.73927 2.99886   2 
  -3  -6   5 -4.5410 5.65292   2 
   2   6  -5 14.1638 5.29405   2 
  -2  -6   5 7.63050 2.73538   2 
  -2  -6   5 0.59995 5.10072   2 
   1   6  -5 15.5227 4.86585   2 
   1   6  -5 10.4339 3.08686   2 
   0   6  -5 46.7656 4.45517   2 
   0   6  -5 49.9845 4.97680   2 
  -1   6  -5 333.441 10.5525   2 
  -1   6  -5 337.524 9.65792   2 
  -2   6  -5 43.9218 4.71904   2 
  -2   6  -5 49.0518 4.75637   2 
  -3   6  -5 1.30923 3.49961   2 
  -3   6  -5 5.30481 4.26070   2 
  -3   6  -5 7.24652 3.54586   1 
  -4   6  -5 1.49167 4.09317   2 
  -4   6  -5 -2.1545 5.26035   2 
  -4   6  -5 6.00161 4.42503   1 
   6   5  -5 98.6397 8.38054   1 
   6   5  -5 118.388 14.3326   2 
   6   5  -5 121.969 14.2131   2 
  -6  -5   5 110.744 12.9591   2 
  -6  -5   5 84.3157 8.80241   2 
   5   5  -5 18.0683 8.62829   2 
   5   5  -5 -4.7099 6.47776   2 
  -5  -5   5 -0.5428 4.36501   2 
  -5  -5   5 -7.7804 7.73253   2 
   4   5  -5 64.5543 7.77446   2 
   4   5  -5 63.5010 6.72810   2 
  -4  -5   5 63.4348 6.29991   2 
  -4  -5   5 83.5027 9.62005   2 
   3   5  -5 27.4197 5.45222   2 
   3   5  -5 26.0619 5.51816   2 
  -3  -5   5 25.0298 5.32090   2 
  -3  -5   5 23.9737 3.31553   2 
   2   5  -5 52.5177 5.27899   2 
   2   5  -5 54.1483 5.47247   2 
  -2  -5   5 41.7033 3.78255   2 
  -2  -5   5 52.0621 5.57490   2 
   1   5  -5 27.8365 4.30087   2 
   0   5  -5 40.7120 4.75971   2 
   0   5  -5 41.1335 3.75147   2 
  -1   5  -5 9.25449 2.74862   2 
  -2   5  -5 4.60540 2.41844   1 
  -2   5  -5 3.41073 1.99775   2 
  -2   5  -5 7.33094 2.67726   2 
  -3   5  -5 433.614 12.4308   1 
  -3   5  -5 444.127 12.2393   2 
  -4   5  -5 4.05427 4.55296   2 
  -4   5  -5 9.71291 3.78421   1 
  -4   5  -5 4.25961 3.54507   2 
   4  -5   5 -8.6519 3.57319   1 
  -5   5  -5 19.6041 5.16739   1 
  -5   5  -5 13.3286 5.80341   2 
  -5   5  -5 9.84906 6.59449   2 
   5  -5   5 24.8348 5.49401   1 
   7   4  -5 -11.047 9.48395   2 
   6   4  -5 -3.6665 4.11290   1 
   6   4  -5 -7.5506 7.19707   2 
   6   4  -5 -8.5977 9.71177   2 
  -6  -4   5 4.41442 6.99545   2 
  -6  -4   5 -6.4847 2.44593   1 
  -6  -4   5 -0.2181 9.36111   2 
   5   4  -5 10.1179 5.74696   2 
   5   4  -5 -4.0123 7.19740   2 
   5   4  -5 5.54759 3.25080   1 
  -5  -4   5 4.08598 1.80820   1 
  -5  -4   5 14.9511 6.99535   2 
   4   4  -5 -5.5148 4.15534   2 
   4   4  -5 1.48758 5.79965   2 
   4   4  -5 6.25735 2.48782   1 
  -4  -4   5 11.6454 3.24847   2 
  -4  -4   5 4.94477 4.90767   2 
   3   4  -5 61.3122 6.14564   2 
  -3  -4   5 64.1741 6.82263   2 
  -3  -4   5 54.4426 4.66590   2 
   2   4  -5 5.52972 3.38934   2 
   2   4  -5 13.7171 3.31788   2 
  -2  -4   5 13.2400 3.65119   2 
  -2  -4   5 11.3551 2.13344   2 
   1   4  -5 2.70653 2.48813   2 
   1   4  -5 9.43075 2.94825   2 
   0   4  -5 216.097 6.75553   2 
   0   4  -5 216.969 6.57901   2 
  -1   4  -5 -1.4262 1.59627   1 
  -2   4  -5 87.6672 4.51608   1 
  -3   4  -5 1.21090 2.26297   2 
  -3   4  -5 -4.6968 2.76686   2 
  -3   4  -5 0.07855 2.22280   1 
   3  -4   5 2.96091 2.45359   1 
  -4   4  -5 4.77113 2.93595   2 
  -4   4  -5 4.82848 3.13647   1 
  -4   4  -5 -0.2909 4.43911   2 
   4  -4   5 7.40845 3.28936   1 
  -5   4  -5 116.571 8.14453   1 
  -5   4  -5 138.178 11.0246   2 
  -5   4  -5 123.640 8.86886   2 
   5  -4   5 142.348 9.14170   1 
  -6   4  -5 11.8448 5.24448   1 
  -6   4  -5 12.1656 8.68376   2 
  -6   4  -5 -0.6803 6.71179   2 
   6  -4   5 0.62371 5.78051   1 
   7   3  -5 -3.3287 13.1803   2 
   7   3  -5 -11.385 5.36953   1 
   7   3  -5 9.78564 8.68014   2 
  -7  -3   5 -7.5944 11.4148   2 
  -7  -3   5 13.7750 8.76749   2 
  -7  -3   5 -3.4400 3.30968   1 
   6   3  -5 -2.3360 12.4614   2 
   6   3  -5 10.2406 4.12454   1 
   6   3  -5 -2.6960 5.96123   2 
  -6  -3   5 4.80351 2.65036   1 
  -6  -3   5 8.37500 8.25223   2 
  -6  -3   5 13.7008 6.42045   2 
   5   3  -5 5.12465 7.44382   2 
   5   3  -5 7.17510 3.16918   1 
   5   3  -5 -1.9419 4.71670   2 
  -5  -3   5 -3.0268 4.47112   2 
  -5  -3   5 -0.0229 1.97200   1 
  -5  -3   5 -7.7920 5.46033   2 
   4   3  -5 4.08370 3.82183   2 
   4   3  -5 1.58068 2.13884   1 
   4   3  -5 7.64596 5.34246   2 
  -4  -3   5 4.07688 4.56216   2 
  -4  -3   5 1.95799 1.39082   1 
   3   3  -5 146.540 5.06872   1 
   3   3  -5 145.470 8.63387   2 
   3   3  -5 146.888 7.13904   2 
  -3  -3   5 146.408 7.65910   2 
  -3  -3   5 145.516 6.03836   2 
  -3  -3   5 152.746 4.12441   1 
   2   3  -5 33.3587 3.65165   2 
   2   3  -5 30.9375 4.09390   2 
  -2  -3   5 37.0678 3.77335   2 
  -2  -3   5 31.2743 3.09643   2 
   1   3  -5 16.8439 2.77975   2 
   1   3  -5 21.9505 2.84583   2 
   0   3  -5 4.53768 1.11052   1 
   0   3  -5 1.79720 0.96414   1 
  -1   3  -5 48.1556 2.89978   1 
  -2   3  -5 25.4195 2.63449   1 
  -3   3  -5 4.33410 2.65822   2 
  -3   3  -5 1.58028 1.97451   1 
  -3   3  -5 1.16997 1.67090   2 
   3  -3   5 -1.2012 2.09456   1 
  -4   3  -5 -0.2272 4.33005   2 
  -4   3  -5 4.23687 2.89236   2 
  -4   3  -5 2.65509 2.62020   1 
   4  -3   5 6.97447 2.75294   1 
  -5   3  -5 59.1789 6.76312   2 
  -5   3  -5 45.4743 4.92192   1 
  -5   3  -5 52.6595 6.95898   2 
   5  -3   5 55.9754 6.65415   1 
  -6   3  -5 44.1376 5.39536   1 
  -6   3  -5 46.5627 9.01980   2 
  -6   3  -5 43.1469 6.80618   2 
   6  -3   5 54.4534 6.35681   1 
   7   2  -5 232.507 14.8101   2 
   7   2  -5 205.647 25.2750   2 
   7   2  -5 240.831 11.9892   1 
  -7  -2   5 240.642 16.4901   2 
  -7  -2   5 220.499 8.83790   1 
  -7  -2   5 241.499 19.5451   2 
   6   2  -5 8.71972 9.44328   2 
   6   2  -5 13.6978 5.13795   1 
   6   2  -5 7.83012 6.21747   2 
  -6  -2   5 3.36285 7.71385   2 
  -6  -2   5 9.83168 6.23303   2 
  -6  -2   5 1.66958 4.61090   1 
   5   2  -5 157.474 13.3603   2 
   5   2  -5 156.015 9.28994   2 
   5   2  -5 159.395 7.24583   1 
  -5  -2   5 156.108 9.57123   2 
  -5  -2   5 156.489 5.67546   1 
  -5  -2   5 175.810 11.1954   2 
   4   2  -5 85.7393 6.54377   2 
   4   2  -5 83.3900 7.95382   2 
   4   2  -5 86.1130 4.73784   1 
  -4  -2   5 81.4573 3.48630   1 
  -4  -2   5 87.1389 7.50818   2 
  -4  -2   5 80.4694 6.68987   2 
   3   2  -5 81.8323 7.43424   2 
   3   2  -5 88.5847 3.83695   1 
   3   2  -5 83.5880 5.40110   2 
  -3  -2   5 94.2695 5.83892   2 
  -3  -2   5 78.3082 5.18832   2 
  -3  -2   5 90.4552 3.00327   1 
   2   2  -5 3.87649 1.07007   1 
   2   2  -5 5.23377 2.56359   2 
   2   2  -5 1.54347 2.78309   2 
  -2  -2   5 4.00926 0.91122   1 
  -2  -2   5 0.81117 2.21626   2 
  -2  -2   5 1.60293 1.77014   2 
   1   2  -5 8.09289 0.91540   1 
   1   2  -5 9.48932 2.56789   2 
   1   2  -5 7.26818 1.98880   2 
   0   2  -5 130.689 3.77409   1 
  -1   2  -5 108.315 3.99942   1 
  -2   2  -5 64.7261 3.48462   1 
  -3   2  -5 133.743 6.65392   2 
  -3   2  -5 137.225 5.65157   1 
  -3   2  -5 127.992 5.08113   2 
   3  -2   5 139.673 5.75951   1 
  -4   2  -5 75.2171 4.87873   2 
  -4   2  -5 67.5700 4.92424   1 
  -4   2  -5 66.8522 6.02745   2 
   4  -2   5 66.2675 5.14958   1 
  -5   2  -5 28.7106 3.91255   1 
  -5   2  -5 13.3564 6.38421   2 
  -5   2  -5 22.3947 4.44598   2 
   5  -2   5 28.7874 2.99428   2 
   5  -2   5 29.1958 4.18996   1 
   5  -2   5 21.7795 5.93802   2 
  -6   2  -5 5.38012 8.41817   2 
  -6   2  -5 8.54175 4.15969   1 
  -6   2  -5 4.28131 5.44392   2 
   6  -2   5 3.24069 7.36635   2 
   6  -2   5 10.6296 4.14707   1 
  -7   2  -5 16.2191 8.37332   2 
  -7   2  -5 5.52417 5.33323   1 
  -7   2  -5 5.42993 11.5334   2 
   7  -2   5 16.9150 3.62049   2 
   7  -2   5 -2.6597 9.79677   2 
   7  -2   5 16.7969 5.63584   1 
   7   1  -5 55.2914 13.4991   2 
   7   1  -5 34.7702 7.20363   2 
   7   1  -5 44.5865 6.35625   1 
  -7  -1   5 33.7125 8.94349   2 
  -7  -1   5 32.6065 9.93616   2 
  -7  -1   5 31.1397 4.37281   1 
   6   1  -5 0.70671 8.71900   2 
   6   1  -5 14.1161 3.88079   1 
   6   1  -5 2.72910 5.15326   2 
  -6  -1   5 7.31167 6.36332   2 
  -6  -1   5 4.58341 2.86614   1 
   5   1  -5 694.288 22.5198   2 
   5   1  -5 666.930 18.5367   2 
   5   1  -5 663.690 17.3890   1 
  -5  -1   5 661.875 19.0345   2 
  -5  -1   5 663.039 16.0099   1 
  -5  -1   5 673.926 20.0435   2 
   4   1  -5 6.37831 3.19999   2 
   4   1  -5 3.67642 2.10999   1 
   4   1  -5 7.30100 5.69361   2 
  -4  -1   5 3.48296 1.56419   1 
  -4  -1   5 4.53497 3.33992   2 
  -4  -1   5 6.18007 3.88312   2 
   3   1  -5 152.081 8.47328   2 
   3   1  -5 143.222 6.21117   2 
   3   1  -5 153.655 5.11246   1 
  -3  -1   5 143.173 4.32560   1 
  -3  -1   5 149.403 6.58115   2 
   2   1  -5 86.5169 4.59994   2 
   2   1  -5 86.6682 5.86796   2 
   2   1  -5 93.1968 3.26210   1 
  -2  -1   5 97.6596 4.33451   2 
  -2  -1   5 94.8619 4.55683   2 
  -2  -1   5 93.1307 2.88367   1 
   1   1  -5 84.8053 2.58639   1 
   1   1  -5 85.6874 3.62605   2 
  -1  -1   5 86.4513 2.90721   1 
   0   1  -5 370.765 8.60285   1 
  -1   1  -5 575.828 13.6311   1 
  -2   1  -5 195.306 6.14850   1 
  -3   1  -5 2.55419 1.78821   2 
  -3   1  -5 2.01727 3.17918   2 
  -3   1  -5 0.46908 1.52148   1 
   3  -1   5 0.36673 1.46030   1 
  -4   1  -5 11.6602 4.89452   2 
  -4   1  -5 10.0513 2.87152   2 
  -4   1  -5 11.9669 2.53931   1 
   4  -1   5 8.34625 3.61318   2 
   4  -1   5 13.9749 2.60168   1 
  -5   1  -5 5.23579 5.81075   2 
  -5   1  -5 6.84211 3.44146   2 
  -5   1  -5 3.91684 2.80353   1 
   5  -1   5 3.90364 1.91092   2 
   5  -1   5 4.24115 4.80317   1 
   5  -1   5 2.78280 4.74040   2 
  -6   1  -5 0.92875 3.06043   1 
  -6   1  -5 -3.8781 8.09408   2 
  -6   1  -5 -0.1935 5.04313   2 
   6  -1   5 8.66053 2.61453   2 
   6  -1   5 5.01605 3.42880   1 
   6  -1   5 2.23898 6.90272   2 
  -7   1  -5 31.6770 5.19264   1 
  -7   1  -5 33.4897 8.08860   2 
  -7   1  -5 36.5133 10.7811   2 
   7  -1   5 48.4257 10.4847   2 
   7  -1   5 40.9199 4.24725   2 
   7  -1   5 44.1576 5.83145   1 
   7   0  -5 10.8243 5.21150   1 
   7   0  -5 9.65450 6.11617   2 
   7   0  -5 -0.8235 13.0734   2 
  -7   0   5 2.59920 8.19776   2 
  -7   0   5 7.89033 3.79135   1 
  -7   0   5 11.6933 9.68270   2 
   6   0  -5 4.49497 4.48433   2 
   6   0  -5 1.13565 3.60976   1 
   6   0  -5 3.67646 9.57234   2 
  -6   0   5 1.62090 2.73022   1 
  -6   0   5 1.32790 5.84935   2 
  -6   0   5 16.8364 7.35825   2 
   5   0  -5 17.6040 7.00971   2 
   5   0  -5 13.6112 3.75732   2 
   5   0  -5 3.47605 2.70643   1 
  -5   0   5 5.26830 2.10049   1 
  -5   0   5 12.5958 5.13371   2 
  -5   0   5 12.3503 4.60823   2 
   4   0  -5 5.48105 2.00137   1 
   4   0  -5 9.85547 5.31063   2 
   4   0  -5 2.08560 2.59298   2 
  -4   0   5 10.5663 3.36459   2 
  -4   0   5 9.32066 3.69988   2 
  -4   0   5 6.65216 1.55243   1 
   3   0  -5 113.464 7.66805   2 
   3   0  -5 128.352 4.75102   1 
   3   0  -5 126.958 5.43854   2 
  -3   0   5 120.015 6.09296   2 
  -3   0   5 126.079 6.01732   2 
  -3   0   5 125.843 3.96617   1 
   2   0  -5 23.3432 1.93621   1 
   2   0  -5 25.9231 3.45182   2 
   2   0  -5 26.1041 2.74999   2 
  -2   0   5 24.6584 1.59073   1 
  -2   0   5 26.6983 2.71467   2 
   1   0  -5 10.4916 2.14790   2 
   1   0  -5 11.8409 1.20184   1 
   1   0  -5 10.1279 1.45481   2 
  -1   0   5 9.65668 1.37351   2 
  -1   0   5 10.9085 1.31403   1 
  -1   0   5 12.3367 1.70947   2 
   0   0  -5 67.4348 2.40301   1 
  -2   0  -5 403.268 9.56323   2 
  -2   0  -5 396.153 10.3586   1 
  -3   0  -5 126.896 6.94821   2 
  -3   0  -5 143.441 5.29392   1 
  -3   0  -5 130.651 5.09148   2 
   3   0   5 132.250 5.22875   1 
  -4   0  -5 52.2968 4.72676   2 
  -4   0  -5 52.6723 5.30620   2 
  -4   0  -5 64.0472 4.14164   1 
   4   0   5 59.3625 3.53569   2 
   4   0   5 56.2830 5.89908   2 
   4   0   5 60.2673 4.09568   1 
  -5   0  -5 2.46253 2.12190   1 
  -5   0  -5 7.08290 6.85922   2 
  -5   0  -5 4.25494 3.34539   2 
   5   0   5 2.68780 2.13572   2 
   5   0   5 5.45923 2.05460   1 
   5   0   5 10.2330 4.73554   2 
  -6   0  -5 7.41106 2.92432   1 
  -6   0  -5 7.82576 4.66814   2 
  -6   0  -5 1.90855 6.96945   2 
   6   0   5 10.6496 3.04236   2 
   6   0   5 19.7865 6.48169   2 
   6   0   5 13.0605 3.48861   1 
  -7   0  -5 1.97259 3.96828   1 
  -7   0  -5 5.53196 9.41478   2 
  -7   0  -5 3.24045 7.67133   2 
   7   0   5 8.05757 9.01673   2 
   7   0   5 5.55620 4.07523   1 
   7   0   5 -5.3719 3.80300   2 
   7  -1  -5 24.7235 14.3593   2 
   7  -1  -5 11.7576 5.16402   1 
  -7   1   5 8.77243 8.56578   2 
  -7   1   5 12.3091 9.37632   2 
  -7   1   5 5.67952 3.57206   1 
   6  -1  -5 112.253 7.28636   1 
   6  -1  -5 137.411 12.9330   2 
   6  -1  -5 113.191 8.98345   2 
  -6   1   5 129.881 11.4974   2 
  -6   1   5 119.324 11.8615   2 
  -6   1   5 117.465 5.91787   1 
   5  -1  -5 16.0512 7.45786   2 
   5  -1  -5 18.6514 3.44758   1 
   5  -1  -5 14.4214 3.72503   2 
  -5   1   5 18.7887 5.26184   2 
  -5   1   5 13.1555 2.19947   1 
  -5   1   5 16.9324 4.62216   2 
   4  -1  -5 -0.4930 2.41877   2 
   4  -1  -5 4.81522 5.44209   2 
   4  -1  -5 -2.9182 1.50533   1 
  -4   1   5 -0.9745 1.31316   1 
  -4   1   5 -1.4345 3.28954   2 
  -4   1   5 5.04447 3.22885   2 
   3  -1  -5 56.7735 5.44636   2 
   3  -1  -5 58.9175 3.38829   1 
   3  -1  -5 56.3470 3.90683   2 
  -3   1   5 59.0870 4.76547   2 
  -3   1   5 59.2992 2.73416   1 
  -3   1   5 63.5058 4.52912   2 
   2  -1  -5 73.8201 5.23858   2 
   2  -1  -5 74.8755 3.51365   2 
   2  -1  -5 74.9710 3.08552   1 
  -2   1   5 73.4158 2.64360   1 
  -2   1   5 77.4973 3.94556   2 
  -2   1   5 70.6933 3.86575   2 
   1  -1  -5 30.7284 1.67650   1 
   1  -1  -5 33.0108 3.19853   2 
   1  -1  -5 30.5279 2.11040   2 
  -1   1   5 33.1589 1.64333   1 
  -1   1   5 31.7926 2.22225   2 
   0  -1  -5 119.886 3.55276   2 
   0  -1  -5 125.489 3.46778   2 
   0  -1  -5 122.816 3.53764   1 
   0   1   5 124.155 3.38793   2 
   0   1   5 124.948 3.49739   2 
   0   1   5 125.058 3.82246   1 
  -1  -1  -5 67.3731 2.52576   2 
  -1  -1  -5 62.8799 2.87020   2 
   1   1   5 62.7638 2.53817   2 
   1   1   5 64.4816 2.18351   2 
  -2  -1  -5 12.2995 1.72997   1 
  -2  -1  -5 14.6981 2.71647   2 
  -2  -1  -5 14.2003 1.82649   2 
   2   1   5 13.9231 1.68374   2 
  -3  -1  -5 1.40070 1.92813   2 
  -3  -1  -5 -0.7188 3.26232   2 
  -3  -1  -5 0.84249 1.07805   1 
   3   1   5 1.30609 2.35693   2 
   3   1   5 1.35791 1.44472   2 
  -4  -1  -5 -1.3975 2.19127   2 
  -4  -1  -5 -1.1654 1.64297   1 
  -4  -1  -5 -4.4856 4.94277   2 
   4   1   5 -2.9731 1.81643   2 
   4   1   5 -4.3180 2.95302   2 
   4   1   5 -0.9245 1.60083   1 
  -5  -1  -5 -1.5063 5.22870   2 
  -5  -1  -5 -2.4640 2.08084   1 
  -5  -1  -5 -5.2512 3.55373   2 
   5   1   5 4.11829 4.59063   2 
   5   1   5 -1.6459 1.97612   1 
   5   1   5 -1.3317 2.59586   2 
  -6  -1  -5 39.4537 9.27328   2 
  -6  -1  -5 59.7967 8.39190   2 
  -6  -1  -5 44.4827 5.10828   1 
   6   1   5 38.8031 7.68074   2 
   6   1   5 50.3003 5.48376   1 
   6   1   5 49.6597 4.82794   2 
  -7  -1  -5 -2.9742 6.74010   2 
  -7  -1  -5 13.3542 10.3525   2 
  -7  -1  -5 -3.9200 3.48736   1 
   7   1   5 7.97710 4.09797   1 
   7   1   5 8.09929 9.29915   2 
   7   1   5 3.04138 4.66391   2 
  -8  -1  -5 0.18899 5.37395   1 
   8   1   5 15.6635 6.10737   1 
   8   1   5 9.95519 5.95375   2 
   7  -2  -5 26.0893 15.1038   2 
   7  -2  -5 13.2134 5.17832   1 
   7  -2  -5 17.4793 5.74369   2 
  -7   2   5 -11.377 8.65643   2 
  -7   2   5 23.3358 13.9207   2 
  -7   2   5 3.43321 3.45378   1 
   6  -2  -5 -3.9118 10.1680   2 
   6  -2  -5 15.7377 4.68754   2 
   6  -2  -5 13.8059 3.75848   1 
  -6   2   5 13.5285 6.52103   2 
  -6   2   5 22.2638 6.90892   2 
  -6   2   5 10.7810 2.97576   1 
   5  -2  -5 5.24512 3.04631   2 
   5  -2  -5 1.06643 2.74435   1 
   5  -2  -5 8.24796 7.92976   2 
  -5   2   5 -3.1304 1.90591   1 
  -5   2   5 -0.7591 4.64979   2 
  -5   2   5 3.14004 4.32679   2 
   4  -2  -5 1.65476 2.47068   2 
   4  -2  -5 0.08717 1.87905   1 
   4  -2  -5 0.87170 5.30960   2 
  -4   2   5 4.39519 3.69953   2 
  -4   2   5 0.83736 1.50173   1 
  -4   2   5 2.14508 3.15611   2 
   3  -2  -5 212.882 9.36009   2 
   3  -2  -5 211.955 6.77559   1 
   3  -2  -5 213.108 6.87892   2 
  -3   2   5 211.244 7.54146   2 
  -3   2   5 214.535 6.00540   1 
  -3   2   5 216.747 7.84724   2 
   2  -2  -5 130.479 6.50802   2 
   2  -2  -5 129.687 4.37462   1 
   2  -2  -5 132.936 4.56617   2 
  -2   2   5 125.093 3.86046   1 
  -2   2   5 131.885 5.00820   2 
  -2   2   5 125.004 5.00781   2 
   1  -2  -5 28.2683 1.74661   1 
   1  -2  -5 28.4609 2.08062   2 
   1  -2  -5 28.9077 3.15481   2 
  -1   2   5 25.4485 2.41461   2 
  -1   2   5 26.6378 2.18430   2 
  -1   2   5 27.5626 1.59485   1 
   0  -2  -5 42.3071 2.43817   2 
   0  -2  -5 43.7059 2.37417   2 
   0  -2  -5 43.3707 1.86484   1 
   0   2   5 40.7145 2.18530   2 
   0   2   5 43.4171 2.13009   1 
  -1  -2  -5 681.033 15.4580   1 
  -1  -2  -5 693.468 15.8331   2 
  -1  -2  -5 702.857 15.3608   2 
   1   2   5 679.862 15.4658   2 
  -2  -2  -5 42.2462 4.02219   2 
  -2  -2  -5 37.4107 2.93499   2 
  -2  -2  -5 38.8092 2.71817   1 
   2   2   5 37.9847 3.13724   2 
  -3  -2  -5 490.141 12.5835   1 
  -3  -2  -5 500.518 12.6873   2 
  -3  -2  -5 493.135 14.0093   2 
   3   2   5 489.180 12.6165   2 
  -4  -2  -5 61.4987 7.40293   2 
  -4  -2  -5 57.1566 3.95250   1 
  -4  -2  -5 60.0268 5.38943   2 
   4   2   5 50.7750 4.57330   2 
  -5  -2  -5 66.2745 7.16118   2 
  -5  -2  -5 57.6314 7.50745   2 
  -5  -2  -5 57.3893 4.81935   1 
   5   2   5 52.4817 4.61140   1 
   5   2   5 52.7706 5.80268   2 
  -6  -2  -5 30.3867 8.93314   2 
  -6  -2  -5 37.2919 4.41995   1 
  -6  -2  -5 33.9884 6.11047   2 
   6   2   5 35.4368 4.43359   1 
   6   2   5 29.4266 4.91707   2 
  -7  -2  -5 26.9619 9.99012   2 
  -7  -2  -5 27.0204 7.92231   2 
  -7  -2  -5 11.2925 4.30399   1 
   7   2   5 25.8146 6.16175   2 
   7   2   5 25.4319 5.09224   1 
   7   2   5 33.1194 9.60786   2 
  -8  -2  -5 32.6850 14.5622   2 
  -8  -2  -5 18.6592 10.8404   2 
  -8  -2  -5 5.24777 6.12959   1 
   8   2   5 23.1372 13.2640   2 
   8   2   5 -2.8554 7.04238   2 
   8   2   5 21.6772 6.54396   1 
   7  -3  -5 -2.4874 5.66819   2 
   7  -3  -5 -9.9918 5.14639   1 
   7  -3  -5 -6.7341 16.5618   2 
  -7   3   5 -4.4526 3.59941   1 
  -7   3   5 -19.208 16.5297   2 
   6  -3  -5 -3.1751 11.0229   2 
   6  -3  -5 4.61615 3.89484   1 
   6  -3  -5 11.8548 4.51602   2 
  -6   3   5 -2.1525 2.88417   1 
  -6   3   5 5.36677 6.33439   2 
  -6   3   5 0.21267 7.28619   2 
   5  -3  -5 78.1932 6.10555   2 
   5  -3  -5 76.7806 10.2413   2 
   5  -3  -5 75.4403 5.84931   1 
  -5   3   5 71.3535 8.76570   2 
  -5   3   5 88.8468 8.84026   2 
  -5   3   5 72.5316 4.41373   1 
   4  -3  -5 68.1984 4.79419   1 
   4  -3  -5 70.2774 4.95436   2 
   4  -3  -5 67.8824 7.45751   2 
  -4   3   5 61.4943 3.58334   1 
  -4   3   5 63.4519 6.55811   2 
  -4   3   5 66.1096 6.44952   2 
   3  -3  -5 16.3336 2.40374   2 
   3  -3  -5 13.3874 2.12191   1 
   3  -3  -5 16.7512 4.66890   2 
  -3   3   5 18.1856 1.96853   1 
  -3   3   5 16.1773 3.25158   2 
  -3   3   5 17.2248 3.01301   2 
   2  -3  -5 4.09594 1.60084   2 
   2  -3  -5 7.44068 3.15486   2 
   2  -3  -5 2.36210 1.41285   1 
  -2   3   5 6.59690 2.15198   2 
  -2   3   5 2.61292 0.89063   1 
  -2   3   5 6.09699 2.08803   2 
   1  -3  -5 876.029 20.7179   2 
   1  -3  -5 907.946 20.2474   2 
   1  -3  -5 892.813 19.7876   1 
  -1   3   5 903.850 20.1819   2 
  -1   3   5 898.586 19.5902   1 
  -1   3   5 928.372 20.4205   2 
   0  -3  -5 432.989 10.0186   1 
   0  -3  -5 448.943 10.9221   2 
   0  -3  -5 441.943 10.7536   2 
   0   3   5 452.747 10.6785   2 
   0   3   5 432.505 10.2660   1 
   0   3   5 441.916 10.6275   2 
  -1  -3  -5 526.267 12.0008   2 
  -1  -3  -5 497.231 12.6868   2 
  -1  -3  -5 498.685 11.5311   1 
   1   3   5 495.028 12.0816   2 
   1   3   5 504.196 12.1256   2 
  -2  -3  -5 21.0320 2.29303   2 
  -2  -3  -5 23.1502 3.57469   2 
   2   3   5 24.1980 2.50731   2 
   2   3   5 21.8480 2.59816   2 
  -3  -3  -5 66.6347 3.71476   1 
  -3  -3  -5 67.4389 6.57481   2 
  -3  -3  -5 61.6690 4.61507   2 
   3   3   5 70.2624 5.38917   2 
   3   3   5 72.5621 4.78980   2 
  -4  -3  -5 30.5689 3.60993   1 
  -4  -3  -5 31.6655 4.00779   2 
  -4  -3  -5 27.9778 5.78977   2 
   4   3   5 31.7509 4.46828   2 
   4   3   5 27.4120 3.83653   2 
  -5  -3  -5 5.27066 3.94220   2 
  -5  -3  -5 2.41458 2.46849   1 
  -5  -3  -5 0.17305 6.42980   2 
   5   3   5 0.48825 4.74450   2 
   5   3   5 -4.0300 3.59347   2 
  -6  -3  -5 33.7032 5.85059   2 
  -6  -3  -5 25.4582 9.37142   2 
  -6  -3  -5 19.4750 4.17109   1 
   6   3   5 28.6413 5.56683   2 
   6   3   5 21.1948 4.23703   1 
   6   3   5 32.3874 7.19631   2 
  -7  -3  -5 -1.0462 11.0960   2 
  -7  -3  -5 11.6579 7.05113   2 
  -7  -3  -5 1.68981 4.65212   1 
   7   3   5 8.86795 9.27971   2 
   7   3   5 -5.1728 5.93108   2 
   7   3   5 6.61658 4.42084   1 
  -8  -3  -5 22.3486 10.9357   2 
  -8  -3  -5 6.18849 6.50285   1 
   8   3   5 15.0827 9.58491   2 
   8   3   5 1.72502 6.22712   1 
   6  -4  -5 1.35673 4.87289   1 
   6  -4  -5 5.73929 4.30330   2 
   6  -4  -5 18.3019 13.7836   2 
  -6   4   5 5.31920 7.56567   2 
  -6   4   5 0.30965 3.27531   1 
  -6   4   5 -7.3884 7.60559   2 
   5  -4  -5 5.21848 3.28338   2 
   5  -4  -5 1.08542 3.21656   1 
   5  -4  -5 0.64392 9.00318   2 
  -5   4   5 3.05597 5.47181   2 
  -5   4   5 0.42238 2.56208   1 
  -5   4   5 1.29119 4.99609   2 
   4  -4  -5 60.7555 8.04130   1 
   4  -4  -5 95.7273 5.34206   2 
   4  -4  -5 101.960 9.47007   2 
  -4   4   5 72.2153 5.33666   1 
  -4   4   5 90.6695 7.20596   2 
  -4   4   5 93.6846 7.48809   2 
   3  -4  -5 132.314 5.74523   1 
   3  -4  -5 123.727 5.40530   2 
   3  -4  -5 116.850 9.89086   2 
  -3   4   5 131.926 6.60295   2 
  -3   4   5 132.540 6.61086   2 
  -3   4   5 119.575 4.48579   1 
   2  -4  -5 236.801 7.38481   2 
   2  -4  -5 240.006 9.47265   2 
   2  -4  -5 240.908 7.26808   1 
  -2   4   5 245.345 7.65678   2 
  -2   4   5 251.769 6.48625   1 
  -2   4   5 231.684 7.77556   2 
   1  -4  -5 1.41890 1.26896   1 
   1  -4  -5 2.77051 1.70158   2 
   1  -4  -5 0.41368 2.65716   2 
  -1   4   5 0.31683 0.96423   1 
  -1   4   5 1.76732 1.64689   2 
  -1   4   5 3.30771 1.69897   2 
   0  -4  -5 79.8096 2.89713   1 
   0  -4  -5 80.3625 4.28679   2 
   0  -4  -5 72.8244 4.22504   2 
   0   4   5 77.9843 3.76569   2 
   0   4   5 77.1114 3.03451   1 
   0   4   5 75.4663 3.80563   2 
  -1  -4  -5 872.253 18.9116   1 
  -1  -4  -5 872.611 19.8490   2 
   1   4   5 865.839 20.0321   2 
   1   4   5 872.079 20.0979   2 
  -2  -4  -5 1138.68 25.2167   2 
  -2  -4  -5 1085.46 24.4701   1 
  -2  -4  -5 1124.58 26.9786   2 
   2   4   5 1144.87 25.8118   2 
   2   4   5 1105.31 25.6528   2 
  -3  -4  -5 707.940 17.7589   2 
  -3  -4  -5 753.344 20.3685   2 
  -3  -4  -5 722.292 17.5722   1 
   3   4   5 735.883 18.5271   2 
  -4  -4  -5 46.7748 6.75950   2 
  -4  -4  -5 54.0287 4.31612   1 
  -4  -4  -5 43.3471 4.40640   2 
   4   4   5 59.3238 6.05317   2 
   4   4   5 40.9910 5.33819   2 
  -5  -4  -5 3.83854 2.69639   1 
  -5  -4  -5 10.7071 7.55451   2 
  -5  -4  -5 2.31374 4.55543   2 
   5   4   5 1.84054 4.16460   2 
   5   4   5 9.91220 5.94119   2 
  -6  -4  -5 8.88365 4.59501   1 
  -6  -4  -5 15.1974 9.29586   2 
  -6  -4  -5 2.79013 5.74031   2 
   6   4   5 2.80959 5.79490   2 
   6   4   5 10.1724 7.42926   2 
  -7  -4  -5 14.2854 5.17714   1 
  -7  -4  -5 9.99477 8.41269   2 
  -7  -4  -5 38.4389 13.3439   2 
   7   4   5 16.0820 7.80502   2 
   7   4   5 21.1536 10.3067   2 
   6  -5  -5 -11.674 16.0460   2 
   6  -5  -5 13.6270 5.20717   2 
   6  -5  -5 12.4225 6.12016   1 
  -6   5   5 18.7942 8.87592   2 
  -6   5   5 4.93512 4.05008   1 
  -6   5   5 2.79641 9.02119   2 
   5  -5  -5 72.7096 12.9124   2 
   5  -5  -5 77.7321 8.31802   1 
   5  -5  -5 83.1455 7.35874   2 
  -5   5   5 71.1505 5.67341   1 
  -5   5   5 74.9890 8.23706   2 
  -5   5   5 98.9688 10.3032   2 
   4  -5  -5 8.60479 3.28573   2 
   4  -5  -5 20.1478 8.51492   2 
   4  -5  -5 12.4765 4.12021   1 
  -4   5   5 14.5366 2.50756   1 
  -4   5   5 9.43659 4.58852   2 
  -4   5   5 12.8669 4.71604   2 
   3  -5  -5 24.7533 3.52766   2 
   3  -5  -5 20.2838 6.62398   2 
   3  -5  -5 14.0156 3.26227   1 
  -3   5   5 19.4722 2.32996   1 
  -3   5   5 26.7186 4.14185   2 
  -3   5   5 25.4106 3.92814   2 
   2  -5  -5 7.45057 2.35174   1 
   2  -5  -5 6.97679 4.78346   2 
   2  -5  -5 8.77532 2.59237   2 
  -2   5   5 9.24554 1.60755   1 
  -2   5   5 7.84134 2.75491   2 
  -2   5   5 8.54557 2.79342   2 
   1  -5  -5 29.0635 3.04674   1 
   1  -5  -5 34.5355 3.41644   2 
   1  -5  -5 35.1735 4.09131   2 
  -1   5   5 32.3392 3.06760   2 
  -1   5   5 34.8156 2.23434   1 
  -1   5   5 33.6042 3.78416   2 
   0  -5  -5 92.9738 5.29049   2 
   0  -5  -5 97.1023 5.69892   2 
   0  -5  -5 96.7646 3.64689   1 
   0   5   5 96.4159 4.77117   2 
   0   5   5 97.7092 3.68384   1 
   0   5   5 93.8278 4.85876   2 
  -1  -5  -5 17.9582 1.84525   1 
  -1  -5  -5 13.4096 2.59946   2 
   1   5   5 21.5947 2.83675   2 
   1   5   5 21.0363 2.77526   2 
  -2  -5  -5 56.9456 2.88406   1 
  -2  -5  -5 64.2883 7.23089   2 
  -2  -5  -5 63.6220 4.70513   2 
   2   5   5 65.9243 4.98045   2 
   2   5   5 60.2395 5.18981   2 
  -3  -5  -5 147.982 5.84100   1 
  -3  -5  -5 152.259 5.53842   1 
  -3  -5  -5 133.920 10.0871   2 
  -3  -5  -5 150.851 6.89755   2 
   3   5   5 144.073 7.33786   2 
   3   5   5 138.564 7.70062   2 
  -4  -5  -5 237.992 13.7653   2 
  -4  -5  -5 235.706 8.10332   1 
  -4  -5  -5 222.835 9.40897   2 
   4   5   5 227.923 10.4885   2 
  -5  -5  -5 76.0336 10.2161   2 
  -5  -5  -5 60.8605 6.20015   2 
  -5  -5  -5 75.7389 6.10904   1 
   5   5   5 71.2214 7.94395   2 
   5   5   5 83.2227 9.58414   2 
  -6  -5  -5 31.1605 6.00407   1 
  -6  -5  -5 36.9448 11.2784   2 
  -6  -5  -5 22.9437 6.83562   2 
   6   5   5 40.8362 7.71950   2 
   6   5   5 18.0125 8.66898   2 
  -7  -5  -5 1.91636 5.27416   1 
  -7  -5  -5 -7.2134 8.35069   2 
  -7  -5  -5 -14.917 14.5392   2 
   7   5   5 29.2419 11.9427   2 
   7   5   5 16.1992 8.87415   2 
   5  -6  -5 -12.057 13.7932   2 
   5  -6  -5 4.94627 5.34013   2 
   5  -6  -5 3.61853 5.20095   1 
  -5   6   5 1.44887 6.91763   2 
  -5   6   5 -7.7529 3.39535   1 
  -5   6   5 -0.8039 6.36974   2 
   4  -6  -5 6.31733 10.1900   2 
   4  -6  -5 5.30619 4.22967   1 
   4  -6  -5 4.71181 4.11848   2 
  -4   6   5 -0.5898 2.43734   1 
  -4   6   5 2.91463 5.28883   2 
  -4   6   5 2.31308 5.01412   2 
   3  -6  -5 45.1759 8.88272   2 
   3  -6  -5 50.3896 5.99388   1 
   3  -6  -5 47.5724 5.85552   2 
  -3   6   5 49.1394 5.28658   2 
  -3   6   5 41.6860 3.59857   1 
  -3   6   5 46.7100 4.97808   2 
   2  -6  -5 15.0070 3.05004   1 
   2  -6  -5 14.3721 3.77388   2 
   2  -6  -5 8.61067 5.87051   2 
  -2   6   5 14.4590 2.03279   1 
  -2   6   5 22.1400 3.55780   2 
  -2   6   5 11.8051 3.52450   2 
   1  -6  -5 7.71004 2.36338   1 
   1  -6  -5 14.7876 3.72927   2 
   1  -6  -5 14.4603 4.54085   2 
  -1   6   5 9.03205 1.72511   1 
  -1   6   5 6.20112 2.90850   2 
  -1   6   5 5.30929 2.93516   2 
   0  -6  -5 120.117 6.84460   2 
   0  -6  -5 119.707 7.52502   2 
   0  -6  -5 132.700 4.74800   1 
   0   6   5 130.979 4.64347   1 
   0   6   5 132.557 6.11962   2 
   0   6   5 125.383 6.42206   2 
  -1  -6  -5 2.24986 3.01382   2 
  -1  -6  -5 -2.6461 4.20471   2 
  -1  -6  -5 3.64200 1.56292   1 
   1   6   5 5.03071 3.04547   2 
   1   6   5 -1.3488 2.54228   2 
  -2  -6  -5 112.476 9.60690   2 
  -2  -6  -5 105.722 3.74748   1 
  -2  -6  -5 118.024 6.40150   2 
   2   6   5 107.628 6.66177   2 
   2   6   5 107.064 6.61668   2 
  -3  -6  -5 6.89157 1.86811   1 
  -3  -6  -5 1.94777 6.08699   2 
  -3  -6  -5 2.43322 2.19601   1 
  -3  -6  -5 7.05223 3.74724   2 
   3   6   5 8.55074 4.02968   2 
   3   6   5 -0.5128 3.93878   2 
  -4  -6  -5 29.2397 8.01072   2 
  -4  -6  -5 14.7148 3.22402   1 
  -4  -6  -5 19.3438 3.32708   1 
  -4  -6  -5 13.2223 4.34225   2 
   4   6   5 13.8500 5.47864   2 
   4   6   5 21.3274 5.21161   2 
  -5  -6  -5 23.9613 10.3357   2 
  -5  -6  -5 18.4337 5.57030   2 
  -5  -6  -5 33.6652 4.31600   1 
   5   6   5 40.5626 7.23539   2 
  -6  -6  -5 38.9014 12.2071   2 
  -6  -6  -5 26.8138 5.08218   1 
  -6  -6  -5 29.4374 7.28072   2 
   6   6   5 39.1200 9.33664   2 
   6   6   5 29.3917 8.55397   2 
  -7  -6  -5 13.5668 9.17272   2 
  -7  -6  -5 7.44852 17.1190   2 
  -7  -6  -5 14.8404 5.75919   1 
   7   6   5 17.4510 12.4363   2 
   7   6   5 2.28495 10.0660   2 
   4  -7  -5 1.66936 5.83944   2 
   4  -7  -5 8.82328 12.0632   2 
   4  -7  -5 -4.4405 5.27039   1 
  -4   7   5 -3.1212 2.93875   1 
  -4   7   5 2.27045 5.73972   2 
  -4   7   5 1.49837 6.09418   2 
   3  -7  -5 11.1534 4.99772   2 
   3  -7  -5 3.87929 4.52334   1 
   3  -7  -5 -7.2539 9.44026   2 
  -3   7   5 11.2477 4.45684   2 
  -3   7   5 11.4052 2.53870   1 
   2  -7  -5 4.69737 3.42111   1 
   2  -7  -5 8.30644 4.62586   2 
   2  -7  -5 4.00491 7.08896   2 
  -2   7   5 2.09620 3.77548   2 
  -2   7   5 9.92522 2.33465   1 
  -2   7   5 4.04028 4.07619   2 
   1  -7  -5 9.58633 4.69809   2 
   1  -7  -5 12.2404 5.75984   2 
   1  -7  -5 8.68977 3.05619   1 
  -1   7   5 9.49466 3.89250   2 
  -1   7   5 12.8902 2.22170   1 
  -1   7   5 5.94810 3.42825   2 
   0  -7  -5 92.4799 4.98359   1 
   0  -7  -5 78.4953 7.99120   2 
   0   7   5 100.812 7.02448   2 
   0   7   5 100.984 4.65059   1 
   0   7   5 103.638 6.49144   2 
  -1  -7  -5 3.53873 4.13015   2 
  -1  -7  -5 -0.3058 1.90890   1 
  -1  -7  -5 4.13612 6.07899   2 
   1   7   5 2.37008 3.50068   2 
   1   7   5 5.29132 3.72809   2 
  -2  -7  -5 17.8661 4.11481   2 
  -2  -7  -5 23.8857 7.13493   2 
   2   7   5 21.4579 4.55219   2 
   2   7   5 18.4680 4.45272   2 
  -3  -7  -5 43.9586 9.05579   2 
  -3  -7  -5 49.4505 3.02941   1 
  -3  -7  -5 66.6806 7.59528   2 
   3   7   5 46.5134 6.31672   2 
   3   7   5 44.7131 6.05234   2 
  -4  -7  -5 11.7269 5.15073   2 
  -4  -7  -5 11.6762 9.15694   2 
  -4  -7  -5 3.48921 2.33760   1 
  -4  -7  -5 10.3018 3.22531   1 
   4   7   5 -5.5015 6.35074   2 
   4   7   5 -1.1314 5.82202   2 
  -5  -7  -5 1.94290 6.25343   2 
  -5  -7  -5 -10.787 11.5523   2 
  -5  -7  -5 -0.1242 3.90808   1 
  -5  -7  -5 5.44178 3.91068   1 
   5   7   5 4.92595 13.2594   2 
   5   7   5 3.32306 7.18342   2 
  -6  -7  -5 6.72263 16.6085   2 
  -6  -7  -5 -2.0444 4.60247   1 
  -6  -7  -5 -5.7149 7.22309   2 
   6   7   5 -13.659 9.63075   2 
   3  -8  -5 32.0143 6.23430   1 
   3  -8  -5 25.9627 7.47323   2 
   3  -8  -5 15.6918 12.7975   2 
  -3   8   5 28.5847 3.62797   1 
  -3   8   5 20.3117 6.85973   2 
  -3   8   5 16.6233 6.86653   2 
   2  -8  -5 -10.730 9.48816   2 
   2  -8  -5 -3.4877 6.25912   2 
   2  -8  -5 -5.1331 4.25401   1 
  -2   8   5 -0.6822 5.41964   2 
  -2   8   5 -4.9643 4.97429   2 
  -2   8   5 1.18250 2.55137   1 
   1  -8  -5 100.290 7.04334   1 
   1  -8  -5 132.086 12.7916   2 
  -1   8   5 106.389 8.48880   2 
  -1   8   5 108.968 5.41076   1 
  -1   8   5 93.9536 8.83295   2 
   0  -8  -5 2.62631 7.28954   2 
   0  -8  -5 -4.7388 5.97566   2 
   0  -8  -5 -0.0231 2.93592   1 
   0   8   5 0.36888 4.15064   2 
   0   8   5 3.77302 4.95877   2 
  -1  -8  -5 43.5226 9.36101   2 
  -1  -8  -5 70.1313 6.85193   2 
   1   8   5 63.1606 6.15752   2 
   1   8   5 54.7340 6.25999   2 
  -2  -8  -5 43.6334 9.46967   2 
  -2  -8  -5 74.9503 6.75738   2 
   2   8   5 80.8384 9.21911   2 
   2   8   5 68.9861 8.22750   2 
  -3  -8  -5 17.5462 5.83675   2 
  -3  -8  -5 -3.7847 10.1374   2 
   3   8   5 10.4784 6.76657   2 
   3   8   5 10.8553 5.57535   2 
  -4  -8  -5 70.7088 13.5403   2 
  -4  -8  -5 52.9332 7.31382   2 
   4   8   5 47.0657 7.96044   2 
   4   8   5 36.2430 8.45666   2 
  -5  -8  -5 7.11645 14.9529   2 
  -5  -8  -5 12.5365 7.61569   2 
   5   8   5 3.95727 10.1191   2 
   5   8   5 8.18118 9.01422   2 
   1  -9  -5 72.9209 11.0929   2 
   1  -9  -5 62.7652 5.77585   1 
   1  -9  -5 62.0888 11.3508   2 
  -1   9   5 70.7095 8.64184   2 
  -1   9   5 77.6347 6.63029   1 
  -1   9   5 62.6775 7.51826   2 
   0  -9  -5 -1.1611 7.98339   2 
   0  -9  -5 11.8042 10.7966   2 
   0   9   5 3.49984 5.31715   2 
   0   9   5 7.48924 6.13784   2 
  -1  -9  -5 23.7551 7.82204   2 
  -1  -9  -5 42.3830 11.7207   2 
   1   9   5 25.4586 7.10331   2 
   1   9   5 34.7144 6.21008   2 
  -2  -9  -5 -10.821 11.3144   2 
  -2  -9  -5 16.4455 7.10583   2 
   2   9   5 -5.4638 5.81680   2 
   2   9   5 9.58086 6.79442   2 
  -3  -9  -5 14.0691 14.5676   2 
  -3  -9  -5 -4.3507 7.07588   2 
   3   9   5 -3.6999 8.68514   2 
   3   9   5 10.3129 6.88957   2 
   3   7  -6 -10.237 8.52312   2 
  -3  -7   6 8.39546 4.12494   2 
   2   7  -6 2.38282 4.89667   2 
   2   7  -6 6.96252 7.19095   2 
   1   7  -6 61.2769 7.27660   2 
   1   7  -6 41.7662 4.61741   2 
   0   7  -6 -1.1890 5.67824   2 
   0   7  -6 -0.6741 3.27018   2 
  -1   7  -6 34.7047 3.96652   2 
  -1   7  -6 28.4981 5.79257   2 
   5   6  -6 20.6607 10.0947   2 
   5   6  -6 -5.6887 8.30342   2 
  -5  -6   6 0.22324 5.17839   2 
  -5  -6   6 25.2723 9.11075   2 
   4   6  -6 52.1383 9.24516   2 
   4   6  -6 67.6108 9.29921   2 
  -4  -6   6 50.4175 5.19197   2 
  -4  -6   6 52.7678 8.18626   2 
   3   6  -6 6.99212 6.59290   2 
   3   6  -6 -2.7786 5.71990   2 
  -3  -6   6 1.47945 3.12287   2 
  -3  -6   6 13.2848 5.61852   2 
   2   6  -6 20.0757 5.71547   2 
   1   6  -6 75.7133 8.02908   2 
   1   6  -6 47.4552 5.76898   2 
   0   6  -6 63.4272 5.59584   2 
   0   6  -6 64.6808 4.77519   2 
  -1   6  -6 35.3190 4.14728   2 
  -1   6  -6 38.8252 4.66906   2 
  -2   6  -6 -5.0293 2.70267   2 
  -2   6  -6 5.81457 3.97387   2 
  -3   6  -6 6.69826 3.66621   2 
  -3   6  -6 8.66257 3.76303   1 
  -3   6  -6 8.34549 4.45832   2 
   6   5  -6 0.26072 9.40414   2 
   6   5  -6 -8.6057 12.0991   2 
   6   5  -6 -1.9996 4.92784   1 
  -6  -5   6 3.28229 10.8012   2 
  -6  -5   6 -1.5432 6.48188   2 
  -6  -5   6 1.50277 2.60933   1 
   5   5  -6 60.9206 8.55096   2 
   5   5  -6 63.0511 10.3953   2 
  -5  -5   6 71.8990 9.30887   2 
  -5  -5   6 73.3829 8.34138   2 
   4   5  -6 37.2772 7.33343   2 
   4   5  -6 24.9536 6.36759   2 
  -4  -5   6 28.4925 4.28487   2 
  -4  -5   6 19.1330 6.11655   2 
   3   5  -6 33.5379 5.73464   2 
   3   5  -6 42.9949 5.97115   2 
  -3  -5   6 22.3313 5.10480   2 
  -3  -5   6 22.4184 3.29273   2 
   2   5  -6 1.76257 3.87274   2 
   2   5  -6 -4.7461 4.19223   2 
   1   5  -6 5.96146 3.60019   2 
   0   5  -6 116.861 4.98329   2 
   0   5  -6 108.630 6.30835   2 
  -1   5  -6 59.5862 3.68429   2 
  -2   5  -6 4.67235 2.50085   1 
  -2   5  -6 -3.2265 2.00549   2 
  -3   5  -6 3.79810 3.47247   2 
  -3   5  -6 9.72569 2.96071   2 
  -3   5  -6 10.9443 3.34197   1 
  -4   5  -6 22.9908 4.93631   2 
  -4   5  -6 23.0029 4.46973   2 
  -4   5  -6 25.9054 4.36686   1 
   6   4  -6 -9.1789 7.71418   2 
   6   4  -6 -10.141 10.8112   2 
   6   4  -6 -3.3498 4.57127   1 
  -6  -4   6 1.48531 9.80840   2 
  -6  -4   6 3.54960 2.50637   1 
  -6  -4   6 4.89189 7.26898   2 
   5   4  -6 2.78242 3.39774   1 
   5   4  -6 -3.1499 8.01982   2 
   5   4  -6 1.68784 5.80573   2 
  -5  -4   6 4.35977 6.81556   2 
  -5  -4   6 -0.9839 4.18116   2 
  -5  -4   6 0.58930 1.99066   1 
   4   4  -6 84.5598 8.68896   2 
   4   4  -6 72.2425 8.57009   2 
  -4  -4   6 89.3197 6.41502   2 
  -4  -4   6 75.4107 3.55414   1 
  -4  -4   6 82.9726 8.37407   2 
   3   4  -6 68.0613 6.83599   2 
   3   4  -6 65.0975 5.88829   2 
  -3  -4   6 68.4988 4.88820   2 
  -3  -4   6 68.7756 7.24136   2 
   2   4  -6 247.434 9.49636   2 
   2   4  -6 258.147 9.59712   2 
   1   4  -6 54.5581 4.81449   2 
   1   4  -6 61.6444 5.36420   2 
  -1   4  -6 109.892 4.76205   1 
  -2   4  -6 19.1334 2.82187   1 
  -3   4  -6 -1.6882 2.43673   1 
  -4   4  -6 16.1719 4.53481   2 
  -4   4  -6 21.9713 3.63994   2 
  -5   4  -6 76.5728 8.02375   1 
  -5   4  -6 97.9346 8.29613   2 
  -5   4  -6 78.2533 7.55020   2 
   5  -4   6 76.5007 7.10372   1 
   7   3  -6 20.3891 6.49923   1 
   7   3  -6 29.7183 10.1390   2 
   7   3  -6 19.3773 14.5869   2 
  -7  -3   6 7.65436 3.64078   1 
  -7  -3   6 22.5744 9.59405   2 
  -7  -3   6 35.7866 12.0449   2 
   6   3  -6 3.73813 6.89910   1 
   6   3  -6 -8.0480 6.86345   2 
   6   3  -6 3.25661 10.3383   2 
  -6  -3   6 1.16052 8.72519   2 
  -6  -3   6 -3.7507 2.68143   1 
  -6  -3   6 0.13007 6.54009   2 
   5   3  -6 -3.3109 5.00842   2 
   5   3  -6 3.37303 3.11465   1 
  -5  -3   6 1.06533 1.84726   1 
  -5  -3   6 3.55739 6.13209   2 
   4   3  -6 5.08836 4.08774   2 
   4   3  -6 12.6013 6.45349   2 
   4   3  -6 8.83603 2.77204   1 
  -4  -3   6 2.97416 3.48985   2 
  -4  -3   6 7.80874 1.58433   1 
  -4  -3   6 4.70547 4.62402   2 
   3   3  -6 0.50964 4.81600   2 
   3   3  -6 5.02895 3.74264   2 
   3   3  -6 5.27115 1.78250   1 
  -3  -3   6 2.90699 3.47459   2 
  -3  -3   6 5.52732 1.34127   1 
  -3  -3   6 4.69575 2.49347   2 
   2   3  -6 21.1308 3.41270   2 
   2   3  -6 26.0950 4.06057   2 
  -2  -3   6 26.0335 3.01593   2 
  -2  -3   6 25.4066 3.22178   2 
   1   3  -6 22.7680 1.60685   1 
   1   3  -6 31.0573 3.44160   2 
   1   3  -6 27.4911 3.17178   2 
   0   3  -6 35.3930 2.20644   1 
   0   3  -6 35.9538 2.63996   1 
  -1   3  -6 73.3676 3.73801   1 
  -2   3  -6 28.6436 3.38068   1 
  -3   3  -6 71.5889 4.93092   1 
  -4   3  -6 6.38686 4.27960   2 
  -4   3  -6 -1.8007 2.55050   1 
  -4   3  -6 2.31117 2.89620   2 
   4  -3   6 3.64825 2.88444   1 
  -5   3  -6 0.03418 3.84112   2 
  -5   3  -6 -0.7155 3.32861   1 
  -5   3  -6 2.51731 6.17472   2 
   5  -3   6 4.03336 3.80565   1 
  -6   3  -6 28.3798 6.57977   2 
  -6   3  -6 26.4196 8.78128   2 
  -6   3  -6 22.7892 5.75939   1 
   6  -3   6 34.6682 5.83396   1 
   7   2  -6 6.21694 5.68892   1 
   7   2  -6 7.93320 7.61172   2 
   7   2  -6 -7.5496 13.4867   2 
  -7  -2   6 7.22386 10.3322   2 
  -7  -2   6 -0.2748 3.32108   1 
  -7  -2   6 3.19707 8.89833   2 
   6   2  -6 11.4209 6.00171   2 
   6   2  -6 11.5672 4.18834   1 
  -6  -2   6 10.2398 2.84078   1 
  -6  -2   6 5.02541 6.37630   2 
  -6  -2   6 10.2871 7.59299   2 
   5   2  -6 3.42334 3.18320   1 
   5   2  -6 -1.1527 4.72503   2 
   5   2  -6 7.77188 7.38738   2 
  -5  -2   6 1.03676 5.21909   2 
  -5  -2   6 -3.7450 1.80706   1 
  -5  -2   6 0.35738 4.61252   2 
   4   2  -6 -3.2805 3.33199   2 
   4   2  -6 -4.6547 2.10064   1 
   4   2  -6 -0.1871 5.64368   2 
  -4  -2   6 -0.2341 1.40489   1 
  -4  -2   6 4.66487 4.08280   2 
   3   2  -6 -0.2773 1.57574   1 
   3   2  -6 2.10913 3.22206   2 
   3   2  -6 -7.8139 4.06981   2 
  -3  -2   6 -4.2504 2.50603   2 
  -3  -2   6 2.53340 1.16202   1 
  -3  -2   6 5.43311 2.76353   2 
   2   2  -6 63.2560 4.83014   2 
   2   2  -6 61.7934 2.74281   1 
   2   2  -6 62.4215 5.73081   2 
  -2  -2   6 63.5740 2.64665   1 
  -2  -2   6 61.3617 4.15083   2 
  -2  -2   6 60.2725 3.80270   2 
   1   2  -6 51.8070 4.53754   2 
   1   2  -6 53.2986 2.06983   1 
   0   2  -6 189.614 5.11573   1 
  -1   2  -6 16.2142 1.96894   1 
  -2   2  -6 97.1043 4.45385   1 
  -3   2  -6 0.71735 1.78664   1 
  -4   2  -6 15.8427 4.90084   2 
  -4   2  -6 17.7884 3.16232   1 
  -4   2  -6 19.1608 3.09448   2 
   4  -2   6 14.6477 2.93646   1 
  -5   2  -6 39.3453 4.45534   1 
  -5   2  -6 32.7986 6.92517   2 
  -5   2  -6 37.0900 4.64796   2 
   5  -2   6 37.9165 4.45988   1 
  -6   2  -6 18.6731 5.67068   2 
  -6   2  -6 13.1086 4.58853   1 
  -6   2  -6 5.02649 8.45447   2 
   6  -2   6 11.1069 4.85525   1 
   6  -2   6 14.7081 2.49408   2 
   6  -2   6 13.7691 6.94234   2 
   7   1  -6 7.95275 13.7114   2 
   7   1  -6 4.81896 6.97890   2 
   7   1  -6 0.21116 5.34971   1 
  -7  -1   6 6.42759 8.83877   2 
  -7  -1   6 16.1426 10.8151   2 
  -7  -1   6 -6.2200 3.49389   1 
   6   1  -6 -4.8252 10.0915   2 
   6   1  -6 4.66478 3.68872   1 
   6   1  -6 -2.1462 5.09850   2 
  -6  -1   6 -4.9431 2.43249   1 
  -6  -1   6 -7.2804 7.06909   2 
  -6  -1   6 -1.7699 6.36621   2 
   5   1  -6 123.820 6.85424   1 
   5   1  -6 126.529 8.19649   2 
   5   1  -6 132.884 13.6941   2 
  -5  -1   6 126.957 9.18608   2 
  -5  -1   6 140.684 10.0483   2 
  -5  -1   6 120.808 5.03776   1 
   4   1  -6 126.777 7.03791   2 
   4   1  -6 93.0985 10.3031   2 
   4   1  -6 120.542 5.40963   1 
  -4  -1   6 115.102 4.20851   1 
  -4  -1   6 111.450 7.49767   2 
  -4  -1   6 117.122 7.28620   2 
   3   1  -6 1027.53 22.4895   1 
   3   1  -6 1027.19 23.6405   2 
   3   1  -6 1019.22 25.3414   2 
  -3  -1   6 1001.91 23.6871   2 
  -3  -1   6 850.573 23.1327   2 
  -3  -1   6 1062.69 21.8135   1 
   2   1  -6 10.1730 3.24339   2 
   2   1  -6 7.79148 2.29118   2 
   2   1  -6 10.7671 1.47019   1 
  -2  -1   6 9.36106 2.17563   2 
  -2  -1   6 11.5193 1.26838   1 
  -2  -1   6 12.6033 2.14963   2 
   1   1  -6 552.622 12.2773   1 
   1   1  -6 551.594 12.9405   2 
  -1  -1   6 558.382 12.6890   1 
   0   1  -6 58.8051 2.53680   1 
  -1   1  -6 138.052 4.79684   1 
  -2   1  -6 389.683 10.3956   1 
  -3   1  -6 -2.5618 1.51018   1 
  -4   1  -6 23.3196 4.92983   2 
  -4   1  -6 22.3742 3.34610   2 
  -4   1  -6 30.3159 3.38068   1 
   4  -1   6 24.7636 3.42067   1 
  -5   1  -6 10.1405 3.47103   2 
  -5   1  -6 3.78169 6.43809   2 
  -5   1  -6 13.3579 3.36605   1 
   5  -1   6 6.66357 3.03469   1 
  -6   1  -6 28.9789 5.65061   2 
  -6   1  -6 29.5700 4.33891   1 
  -6   1  -6 34.3431 9.11903   2 
   6  -1   6 39.6010 4.89289   1 
   6  -1   6 35.3808 6.97928   2 
   6  -1   6 37.9709 4.56109   2 
  -7   1  -6 -6.4001 11.3822   2 
  -7   1  -6 2.77414 4.66048   1 
  -7   1  -6 -0.2331 7.20189   2 
   7  -1   6 12.9997 9.29943   2 
   7  -1   6 12.8872 5.16167   1 
   7  -1   6 3.55687 3.36173   2 
   7   0  -6 5.74740 6.51156   2 
   7   0  -6 4.04875 14.1142   2 
   7   0  -6 5.97273 5.45539   1 
  -7   0   6 17.6699 9.89511   2 
  -7   0   6 -1.5425 8.56693   2 
  -7   0   6 -3.1441 3.47162   1 
   6   0  -6 100.076 8.96637   2 
   6   0  -6 82.5017 12.0019   2 
   6   0  -6 68.6581 7.20136   1 
  -6   0   6 78.0054 8.79360   2 
  -6   0   6 65.2587 7.93681   2 
  -6   0   6 67.4711 4.87528   1 
   5   0  -6 14.9758 3.23198   1 
   5   0  -6 20.7271 4.25677   2 
   5   0  -6 16.1634 7.81918   2 
  -5   0   6 14.3310 4.90841   2 
  -5   0   6 16.2973 5.43419   2 
  -5   0   6 11.4983 2.19965   1 
   4   0  -6 3.28311 1.82508   1 
   4   0  -6 -0.4539 5.28376   2 
   4   0  -6 2.46527 2.63179   2 
  -4   0   6 2.29098 3.49163   2 
  -4   0   6 0.92729 1.55409   1 
  -4   0   6 1.60712 3.42781   2 
   3   0  -6 236.535 6.89933   1 
   3   0  -6 232.126 7.66722   2 
   3   0  -6 238.466 10.0633   2 
  -3   0   6 196.182 10.9488   2 
  -3   0   6 237.493 8.16247   2 
  -3   0   6 232.357 6.15311   1 
   2   0  -6 283.968 9.21357   2 
   2   0  -6 268.907 8.57060   2 
   2   0  -6 277.293 7.09935   1 
  -2   0   6 281.286 6.85879   1 
  -2   0   6 274.289 8.12807   2 
  -2   0   6 276.318 7.84604   2 
   1   0  -6 2452.75 52.4401   2 
   1   0  -6 2480.95 53.0364   2 
   1   0  -6 2468.96 52.1032   1 
  -1   0   6 2515.18 52.1282   2 
  -1   0   6 2531.23 52.5517   2 
  -1   0   6 2532.27 52.3851   1 
   0   0  -6 172.925 4.72579   1 
  -2   0  -6 469.335 12.0906   1 
  -3   0  -6 14.5680 2.17491   2 
  -3   0  -6 12.8514 2.12876   1 
  -3   0  -6 19.5661 3.79492   2 
  -4   0  -6 2.59542 1.69949   1 
  -4   0  -6 -2.5236 4.91947   2 
  -4   0  -6 4.43511 2.67051   2 
   4   0   6 -0.3445 1.82245   1 
  -5   0  -6 46.7643 5.84114   1 
  -5   0  -6 80.1228 6.55405   2 
  -5   0  -6 65.0201 7.69044   2 
   5   0   6 75.2271 4.52861   2 
   5   0   6 65.9173 7.50243   2 
   5   0   6 52.1001 8.13400   1 
  -6   0  -6 1.48507 5.23925   2 
  -6   0  -6 5.80394 3.07522   1 
  -6   0  -6 8.45200 8.14364   2 
   6   0   6 -1.0841 2.81769   2 
   6   0   6 3.46644 3.07242   1 
   6   0   6 2.24793 6.71793   2 
  -7   0  -6 4.63597 6.87070   2 
  -7   0  -6 3.42333 10.0942   2 
  -7   0  -6 3.05644 3.92355   1 
   7   0   6 10.0911 9.25735   2 
   7   0   6 5.17791 3.80983   2 
   7   0   6 13.3903 4.52497   1 
   7  -1  -6 18.2427 7.00166   2 
   7  -1  -6 14.9187 5.45086   1 
   7  -1  -6 -4.7673 15.4226   2 
  -7   1   6 18.2973 9.73356   2 
  -7   1   6 9.85790 9.58747   2 
  -7   1   6 3.20489 3.58637   1 
   6  -1  -6 -3.0882 4.36324   2 
   6  -1  -6 -1.8520 10.2215   2 
   6  -1  -6 -3.2120 3.38167   1 
  -6   1   6 -6.3465 2.48062   1 
  -6   1   6 10.7264 6.39198   2 
  -6   1   6 -2.2014 8.73143   2 
   5  -1  -6 2.95229 2.68491   1 
   5  -1  -6 3.65663 3.60016   2 
   5  -1  -6 -5.8589 7.08436   2 
  -5   1   6 2.69106 2.20243   1 
  -5   1   6 5.01010 4.81105   2 
  -5   1   6 -1.8770 4.63956   2 
   4  -1  -6 2.56142 2.73401   2 
   4  -1  -6 3.37220 1.92270   1 
   4  -1  -6 6.04143 5.81627   2 
  -4   1   6 2.96825 1.42677   1 
  -4   1   6 9.30684 3.59601   2 
  -4   1   6 6.59589 3.76435   2 
   3  -1  -6 102.332 4.30438   1 
   3  -1  -6 94.5606 4.83704   2 
   3  -1  -6 97.7003 7.72816   2 
  -3   1   6 106.344 5.53129   2 
  -3   1   6 103.696 5.65900   2 
  -3   1   6 104.146 3.58767   1 
   2  -1  -6 26.9545 2.81687   2 
   2  -1  -6 22.2473 2.01541   1 
   2  -1  -6 27.3478 3.66100   2 
  -2   1   6 23.4468 1.63250   1 
  -2   1   6 23.5746 2.36764   2 
   1  -1  -6 11.7250 1.73134   2 
   1  -1  -6 11.6717 1.37935   1 
   1  -1  -6 11.2812 2.17853   2 
  -1   1   6 12.9112 1.40005   2 
  -1   1   6 13.7631 1.74545   2 
  -1   1   6 14.4507 1.54333   1 
   0  -1  -6 2.83052 0.94549   2 
   0  -1  -6 2.58562 1.17989   2 
   0  -1  -6 3.46961 0.93916   1 
   0   1   6 4.23907 1.24215   1 
   0   1   6 3.82610 0.97808   2 
   0   1   6 2.06708 0.88009   2 
  -1  -1  -6 1199.11 26.2911   1 
  -1  -1  -6 1185.02 25.7738   2 
  -1  -1  -6 1227.17 25.5344   2 
  -2  -1  -6 -0.1857 2.24154   2 
  -2  -1  -6 0.13656 1.46529   2 
  -2  -1  -6 1.69112 1.19059   1 
  -3  -1  -6 197.242 6.41266   2 
  -3  -1  -6 187.973 8.11348   2 
  -3  -1  -6 191.339 6.50168   1 
   3   1   6 183.641 6.30683   2 
   3   1   6 190.700 5.90730   2 
  -4  -1  -6 243.271 10.8012   2 
  -4  -1  -6 245.976 8.20340   1 
  -4  -1  -6 248.147 8.39297   2 
   4   1   6 257.500 7.83185   2 
  -5  -1  -6 23.0573 3.26776   1 
  -5  -1  -6 15.4278 3.69539   2 
   5   1   6 17.4413 3.21386   1 
   5   1   6 25.8547 4.05618   2 
   5   1   6 12.5174 4.27386   2 
  -6  -1  -6 -3.7705 4.36342   2 
  -6  -1  -6 18.0723 7.83189   2 
  -6  -1  -6 7.54565 3.20175   1 
   6   1   6 -1.6756 2.98849   1 
   6   1   6 -3.4071 5.71278   2 
   6   1   6 3.23618 3.19588   2 
  -7  -1  -6 5.63333 4.05532   1 
  -7  -1  -6 0.11532 7.14238   2 
  -7  -1  -6 10.5821 9.98059   2 
   7   1   6 3.58450 4.29766   1 
   7   1   6 2.77049 4.14246   2 
   7   1   6 2.17766 8.41376   2 
   7  -2  -6 2.97274 4.96242   1 
   7  -2  -6 9.11272 15.3843   2 
   7  -2  -6 10.1207 6.05637   2 
  -7   2   6 -1.9167 9.07542   2 
  -7   2   6 7.80361 9.49985   2 
  -7   2   6 -0.3315 3.31766   1 
   6  -2  -6 9.98658 3.91491   1 
   6  -2  -6 11.8549 4.68955   2 
   6  -2  -6 -0.3206 10.3709   2 
  -6   2   6 10.7871 6.63392   2 
  -6   2   6 8.74364 6.92173   2 
  -6   2   6 10.3411 2.72662   1 
   5  -2  -6 0.38515 3.15586   2 
   5  -2  -6 -12.891 7.65117   2 
   5  -2  -6 -0.3257 2.61010   1 
  -5   2   6 -2.4843 4.24690   2 
  -5   2   6 -1.8054 4.84784   2 
  -5   2   6 2.36616 1.87835   1 
   4  -2  -6 91.5122 5.40898   2 
   4  -2  -6 87.0615 10.1693   2 
   4  -2  -6 79.9007 4.80265   1 
  -4   2   6 89.8539 7.03809   2 
  -4   2   6 91.7869 6.97637   2 
  -4   2   6 88.8506 3.84123   1 
   3  -2  -6 -1.9439 3.82965   2 
   3  -2  -6 -0.0945 1.43116   1 
   3  -2  -6 0.29868 1.83085   2 
  -3   2   6 -4.3778 2.49438   2 
  -3   2   6 -0.7981 1.06883   1 
  -3   2   6 -2.0112 2.33618   2 
   2  -2  -6 1.67631 3.06061   2 
   2  -2  -6 0.15917 1.33241   2 
   2  -2  -6 0.10734 1.05305   1 
  -2   2   6 1.03552 1.82250   2 
  -2   2   6 2.14892 0.84169   1 
  -2   2   6 0.24450 1.66493   2 
   1  -2  -6 110.902 3.51058   1 
   1  -2  -6 111.389 3.83295   2 
   1  -2  -6 110.310 4.80399   2 
  -1   2   6 112.501 3.81188   2 
  -1   2   6 109.346 3.48402   1 
  -1   2   6 97.1294 5.43172   2 
   0  -2  -6 95.7275 3.37033   2 
   0  -2  -6 91.6326 3.43147   2 
   0  -2  -6 92.3446 2.98079   1 
   0   2   6 87.9466 3.13228   2 
   0   2   6 90.1961 3.35711   1 
  -1  -2  -6 10.4428 1.43462   1 
  -1  -2  -6 10.1142 2.34470   2 
  -1  -2  -6 13.7253 1.48973   2 
   1   2   6 13.5067 1.37019   2 
   1   2   6 12.9201 1.53634   2 
  -2  -2  -6 143.439 6.26986   2 
  -2  -2  -6 136.186 4.76696   2 
   2   2   6 134.883 5.00472   2 
   2   2   6 142.421 4.70229   2 
  -3  -2  -6 545.022 13.7298   2 
  -3  -2  -6 547.091 14.1531   1 
   3   2   6 568.186 13.8722   2 
  -4  -2  -6 77.4837 4.60282   1 
  -4  -2  -6 96.8654 8.33434   2 
  -4  -2  -6 90.5155 5.62738   2 
   4   2   6 72.9788 4.97337   2 
   4   2   6 62.0164 6.16546   2 
  -5  -2  -6 6.00238 6.52257   2 
  -5  -2  -6 13.0922 3.01812   1 
  -5  -2  -6 15.4677 4.34144   2 
   5   2   6 14.8307 3.36147   2 
   5   2   6 13.3262 4.77870   2 
  -6  -2  -6 0.81149 7.55338   2 
  -6  -2  -6 11.7299 6.38857   2 
  -6  -2  -6 7.31918 3.29904   1 
   6   2   6 2.78960 4.19254   2 
   6   2   6 1.79583 6.10704   2 
   6   2   6 0.47272 2.98208   1 
  -7  -2  -6 11.1398 10.1606   2 
  -7  -2  -6 -6.6679 3.95994   1 
  -7  -2  -6 3.88873 7.47702   2 
   7   2   6 -14.867 7.88380   2 
   7   2   6 1.03855 5.12727   2 
   7   2   6 -1.0381 4.61258   1 
   6  -3  -6 1.53876 3.87300   1 
   6  -3  -6 18.1078 12.7108   2 
   6  -3  -6 11.0087 6.83223   2 
  -6   3   6 12.5623 7.18673   2 
  -6   3   6 -1.8784 7.14423   2 
  -6   3   6 2.76057 2.72704   1 
   5  -3  -6 6.76178 3.50019   2 
   5  -3  -6 -1.9753 8.85581   2 
   5  -3  -6 2.65887 2.87854   1 
  -5   3   6 0.04165 5.10005   2 
  -5   3   6 4.27055 1.95697   1 
  -5   3   6 5.85941 5.03229   2 
   4  -3  -6 6.95421 2.20875   1 
   4  -3  -6 2.44060 6.71738   2 
   4  -3  -6 10.4185 2.90535   2 
  -4   3   6 10.7126 3.89026   2 
  -4   3   6 7.68994 4.02329   2 
  -4   3   6 7.12557 1.69437   1 
   3  -3  -6 66.6353 4.08881   2 
   3  -3  -6 67.2744 6.33696   2 
   3  -3  -6 58.3126 3.83189   1 
  -3   3   6 64.4849 5.27782   2 
  -3   3   6 56.4525 2.85499   1 
  -3   3   6 64.5536 5.14273   2 
   2  -3  -6 3.81578 1.36314   1 
   2  -3  -6 3.40876 3.24185   2 
   2  -3  -6 1.68229 1.48599   2 
  -2   3   6 3.27862 2.02747   2 
  -2   3   6 3.41553 1.91933   2 
  -2   3   6 3.92965 0.88105   1 
   1  -3  -6 203.942 6.02780   2 
   1  -3  -6 192.590 6.75347   2 
   1  -3  -6 192.962 5.42249   1 
  -1   3   6 200.950 5.94788   2 
  -1   3   6 197.466 6.16680   2 
  -1   3   6 197.628 5.27907   1 
   0  -3  -6 43.8901 2.06098   1 
   0  -3  -6 40.5188 3.09667   2 
   0  -3  -6 45.5731 3.06005   2 
   0   3   6 40.0650 2.64401   2 
   0   3   6 45.6587 2.74983   2 
   0   3   6 43.5756 2.39423   1 
  -1  -3  -6 39.5227 3.52888   2 
  -1  -3  -6 35.6942 2.22707   1 
  -1  -3  -6 33.5666 2.85224   2 
   1   3   6 36.8765 2.70911   2 
   1   3   6 38.8961 2.80564   2 
  -2  -3  -6 69.5701 3.94398   2 
  -2  -3  -6 63.0413 5.47109   2 
   2   3   6 67.2570 3.87823   2 
  -3  -3  -6 329.812 11.7949   2 
  -3  -3  -6 332.223 9.63543   2 
  -3  -3  -6 328.541 9.63229   1 
   3   3   6 342.298 10.0042   2 
  -4  -3  -6 -4.5187 4.99170   2 
  -4  -3  -6 0.94118 3.00022   2 
  -4  -3  -6 1.65351 2.00731   1 
   4   3   6 -0.9016 2.60755   2 
  -5  -3  -6 5.16135 4.39809   2 
  -5  -3  -6 -0.7037 2.40463   1 
  -5  -3  -6 -3.6536 6.09204   2 
   5   3   6 7.17890 5.30925   2 
   5   3   6 -7.4984 3.32117   2 
  -6  -3  -6 -4.5112 8.28798   2 
  -6  -3  -6 13.9981 6.52934   2 
  -6  -3  -6 3.56777 3.71890   1 
   6   3   6 1.48073 4.93260   2 
   6   3   6 4.88858 7.22473   2 
  -7  -3  -6 24.4935 11.9306   2 
  -7  -3  -6 23.0802 4.90020   1 
  -7  -3  -6 39.0242 8.31044   2 
   7   3   6 19.6999 9.56564   2 
   7   3   6 14.2677 6.24773   2 
   6  -4  -6 2.53708 4.69771   2 
   6  -4  -6 6.61738 4.79087   1 
   6  -4  -6 6.59556 14.0406   2 
  -6   4   6 10.3129 8.17448   2 
  -6   4   6 0.59059 7.78511   2 
  -6   4   6 -1.6694 2.96425   1 
   5  -4  -6 12.0901 3.82749   2 
   5  -4  -6 10.0911 9.96387   2 
   5  -4  -6 13.1268 4.39015   1 
  -5   4   6 10.5925 2.43169   1 
  -5   4   6 12.3450 5.78961   2 
  -5   4   6 10.0882 5.62677   2 
   4  -4  -6 19.0463 3.42955   1 
   4  -4  -6 22.2365 7.44041   2 
   4  -4  -6 29.7630 3.55192   2 
  -4   4   6 24.4921 4.68430   2 
  -4   4   6 28.0092 4.72583   2 
  -4   4   6 21.7836 2.38194   1 
   3  -4  -6 63.5815 7.20253   2 
   3  -4  -6 62.8716 4.42153   2 
   3  -4  -6 61.6239 4.58034   1 
  -3   4   6 74.2238 5.93618   2 
  -3   4   6 68.1351 5.57183   2 
  -3   4   6 62.1059 3.20114   1 
   2  -4  -6 27.3286 3.29820   2 
   2  -4  -6 27.1534 4.25248   2 
   2  -4  -6 22.6795 2.44405   1 
  -2   4   6 26.8053 2.95787   2 
  -2   4   6 29.0610 2.17842   1 
  -2   4   6 23.5624 3.13372   2 
   1  -4  -6 124.050 5.12304   2 
   1  -4  -6 120.493 6.09726   2 
   1  -4  -6 120.872 4.22696   1 
  -1   4   6 121.927 4.82759   2 
  -1   4   6 122.342 3.94270   1 
  -1   4   6 120.271 5.01570   2 
   0  -4  -6 24.8893 2.68901   2 
   0  -4  -6 23.1842 1.96962   1 
   0  -4  -6 27.2522 3.28693   2 
   0   4   6 25.4408 3.04257   2 
   0   4   6 22.0750 2.27416   1 
   0   4   6 23.1665 2.76221   2 
  -1  -4  -6 -0.2140 1.01142   1 
  -1  -4  -6 -1.9830 1.82845   2 
  -1  -4  -6 1.08660 2.08331   2 
   1   4   6 -0.5775 1.61293   2 
   1   4   6 2.81178 1.87723   2 
  -2  -4  -6 6.43180 1.58116   1 
  -2  -4  -6 4.01522 3.61206   2 
  -2  -4  -6 5.50763 2.24366   2 
   2   4   6 6.42879 2.41595   2 
   2   4   6 10.2723 2.47872   2 
  -3  -4  -6 430.203 11.6539   1 
  -3  -4  -6 425.354 14.2238   2 
  -3  -4  -6 416.900 11.6656   2 
   3   4   6 425.451 12.3171   2 
   3   4   6 418.416 12.3536   2 
  -4  -4  -6 28.4332 6.38729   2 
  -4  -4  -6 25.6678 3.90715   2 
  -4  -4  -6 24.4662 3.09182   1 
   4   4   6 24.7798 4.04480   2 
  -5  -4  -6 12.4712 7.42193   2 
  -5  -4  -6 -5.5309 4.29513   2 
  -5  -4  -6 8.08500 2.91163   1 
   5   4   6 4.61655 5.57960   2 
   5   4   6 6.50299 4.37459   2 
  -6  -4  -6 -0.1901 8.89443   2 
  -6  -4  -6 4.04979 4.08620   1 
  -6  -4  -6 0.50937 5.44272   2 
   6   4   6 -2.3263 7.69677   2 
   6   4   6 -6.8793 5.38384   2 
  -7  -4  -6 1.48222 5.06336   1 
  -7  -4  -6 0.89257 8.14290   2 
  -7  -4  -6 20.2961 13.6140   2 
   7   4   6 4.42388 7.17251   2 
   7   4   6 22.9166 9.98040   2 
   5  -5  -6 -5.7424 11.3515   2 
   5  -5  -6 2.13688 3.87876   2 
   5  -5  -6 -2.6030 4.52767   1 
  -5   5   6 0.36214 6.19628   2 
  -5   5   6 8.44619 5.99651   2 
  -5   5   6 -7.0900 2.79648   1 
   4  -5  -6 16.4739 4.19581   1 
   4  -5  -6 16.6104 3.81340   2 
   4  -5  -6 20.0576 8.89438   2 
  -4   5   6 22.2496 4.62518   2 
  -4   5   6 21.4506 5.01242   2 
  -4   5   6 14.5433 2.73025   1 
   3  -5  -6 3.12036 2.84627   1 
   3  -5  -6 2.44924 2.64430   2 
   3  -5  -6 -6.3393 6.33422   2 
  -3   5   6 2.17279 3.28831   2 
  -3   5   6 -3.0016 3.24596   2 
  -3   5   6 -0.1809 1.68936   1 
   2  -5  -6 45.4690 4.68654   2 
   2  -5  -6 41.9016 5.72871   2 
   2  -5  -6 41.6730 4.00325   1 
  -2   5   6 41.8324 4.73927   2 
  -2   5   6 43.4613 4.15979   2 
  -2   5   6 43.1416 2.84295   1 
   1  -5  -6 53.7627 4.75670   2 
   1  -5  -6 61.4852 6.25877   2 
   1  -5  -6 62.8150 3.59173   1 
  -1   5   6 57.7246 4.38399   2 
  -1   5   6 56.6253 4.22010   2 
  -1   5   6 55.7671 2.93148   1 
   0  -5  -6 2.57199 2.47111   2 
   0  -5  -6 2.43779 1.41031   1 
   0  -5  -6 2.73214 2.54655   2 
   0   5   6 1.95476 2.08042   2 
   0   5   6 0.96324 2.20278   2 
   0   5   6 0.66485 1.39672   1 
  -1  -5  -6 56.9207 2.71381   1 
  -1  -5  -6 54.7646 4.60186   2 
   1   5   6 70.0190 4.65545   2 
   1   5   6 54.9667 4.23694   2 
  -2  -5  -6 163.283 6.62092   2 
  -2  -5  -6 150.198 8.83880   2 
  -2  -5  -6 155.884 4.92710   1 
   2   5   6 144.120 6.59277   2 
   2   5   6 162.788 6.75100   2 
  -3  -5  -6 17.2151 5.34771   2 
  -3  -5  -6 16.5757 2.52232   1 
  -3  -5  -6 9.59850 2.49036   1 
  -3  -5  -6 10.4499 3.08289   2 
   3   5   6 12.9366 3.67203   2 
   3   5   6 7.20383 3.50057   2 
  -4  -5  -6 151.149 8.32528   2 
  -4  -5  -6 169.283 7.21556   1 
  -4  -5  -6 185.730 12.2715   2 
   4   5   6 178.238 9.58326   2 
  -5  -5  -6 336.491 12.8808   2 
  -5  -5  -6 337.463 11.1763   1 
  -5  -5  -6 333.483 18.2646   2 
   5   5   6 341.458 14.4378   2 
   5   5   6 341.391 14.5886   2 
  -6  -5  -6 57.0170 11.5430   2 
  -6  -5  -6 46.7866 7.35172   2 
  -6  -5  -6 52.9142 5.79308   1 
   6   5   6 51.6257 7.78819   2 
   6   5   6 41.8037 8.72056   2 
  -7  -5  -6 13.6553 5.52149   1 
  -7  -5  -6 -6.8375 14.9884   2 
  -7  -5  -6 -7.5576 8.19536   2 
   7   5   6 8.77128 8.92171   2 
   7   5   6 -5.8784 11.0826   2 
   5  -6  -6 -9.8799 5.63074   1 
   5  -6  -6 -6.1141 14.4901   2 
   5  -6  -6 6.29290 5.54412   2 
  -5   6   6 -5.3145 3.25976   1 
  -5   6   6 4.01734 7.62107   2 
  -5   6   6 2.63011 6.83681   2 
   4  -6  -6 5.68368 4.39886   2 
   4  -6  -6 4.27535 10.0287   2 
   4  -6  -6 5.89623 4.73225   1 
  -4   6   6 9.43823 2.52730   1 
  -4   6   6 3.20355 5.62373   2 
  -4   6   6 7.69067 5.19923   2 
   3  -6  -6 21.3921 4.11166   2 
   3  -6  -6 6.04800 3.63455   1 
   3  -6  -6 8.56381 7.91532   2 
  -3   6   6 15.9541 4.29013   2 
  -3   6   6 17.3503 2.49901   1 
  -3   6   6 13.2806 4.36854   2 
   2  -6  -6 -0.3255 2.80311   1 
   2  -6  -6 3.08375 5.94223   2 
   2  -6  -6 -1.8706 3.30783   2 
  -2   6   6 3.43976 1.90470   1 
  -2   6   6 3.72476 3.14383   2 
  -2   6   6 0.45268 3.33698   2 
   1  -6  -6 15.1012 4.69806   2 
   1  -6  -6 7.97460 2.51041   1 
   1  -6  -6 11.9428 3.54787   2 
  -1   6   6 5.50224 3.04677   2 
  -1   6   6 11.5438 3.30979   2 
   0  -6  -6 5.30925 3.38657   2 
   0  -6  -6 5.70623 1.81193   1 
   0  -6  -6 1.45991 3.74985   2 
   0   6   6 2.76423 1.84025   1 
   0   6   6 2.86150 2.74111   2 
   0   6   6 1.11617 2.74499   2 
  -1  -6  -6 9.71640 3.26999   2 
  -1  -6  -6 7.37860 4.74005   2 
  -1  -6  -6 15.0490 1.78537   1 
   1   6   6 12.0010 3.32147   2 
   1   6   6 9.29914 3.13180   2 
  -2  -6  -6 -10.513 4.81153   2 
  -2  -6  -6 5.01712 1.55270   1 
  -2  -6  -6 6.80764 3.32002   2 
   2   6   6 3.15797 3.13400   2 
   2   6   6 5.69004 3.40927   2 
  -3  -6  -6 30.0814 3.41969   1 
  -3  -6  -6 39.0783 3.41138   1 
  -3  -6  -6 31.9951 4.37540   2 
  -3  -6  -6 33.1293 7.15906   2 
   3   6   6 33.1476 4.84918   2 
   3   6   6 28.7771 4.60788   2 
  -4  -6  -6 12.9670 4.68814   2 
  -4  -6  -6 24.2400 3.64776   1 
  -4  -6  -6 25.2625 3.37626   1 
  -4  -6  -6 32.6818 8.76964   2 
   4   6   6 19.4988 5.94415   2 
   4   6   6 22.6693 5.49771   2 
  -5  -6  -6 16.2864 10.3080   2 
  -5  -6  -6 12.9886 5.59289   2 
  -5  -6  -6 12.5514 4.08475   1 
   5   6   6 18.0460 6.87413   2 
  -6  -6  -6 45.2247 7.96526   2 
  -6  -6  -6 49.1656 5.90239   1 
  -6  -6  -6 41.9112 13.7171   2 
   6   6   6 47.0910 8.70874   2 
  -7  -6  -6 129.613 18.7472   2 
  -7  -6  -6 107.073 10.8962   1 
  -7  -6  -6 112.148 11.6978   2 
   7   6   6 118.797 12.6891   2 
   7   6   6 119.908 14.1072   2 
   4  -7  -6 -2.7578 13.3799   2 
   4  -7  -6 -8.0855 5.45758   1 
   4  -7  -6 -3.2022 5.86416   2 
  -4   7   6 3.30916 3.24823   1 
  -4   7   6 8.94396 6.20375   2 
  -4   7   6 7.29728 6.77451   2 
   3  -7  -6 -3.2138 10.2390   2 
   3  -7  -6 -3.3966 5.17878   2 
   3  -7  -6 1.79490 4.32259   1 
  -3   7   6 0.46771 2.55282   1 
  -3   7   6 5.30420 4.98385   2 
  -3   7   6 4.38679 4.73346   2 
   2  -7  -6 7.90622 4.35356   2 
   2  -7  -6 0.15751 3.55479   1 
   2  -7  -6 4.99095 7.47114   2 
  -2   7   6 6.44937 2.29482   1 
  -2   7   6 2.63869 3.92989   2 
  -2   7   6 2.04645 4.07131   2 
   1  -7  -6 109.940 10.3150   2 
   1  -7  -6 114.029 8.84191   2 
   1  -7  -6 102.429 6.15397   1 
  -1   7   6 102.157 7.40187   2 
  -1   7   6 92.8437 7.05240   2 
  -1   7   6 117.222 4.89326   1 
   0  -7  -6 155.780 9.15755   2 
   0  -7  -6 150.003 6.05976   1 
   0   7   6 158.617 7.65806   2 
   0   7   6 160.938 6.19976   1 
   0   7   6 167.068 8.42134   2 
  -1  -7  -6 53.6484 5.22543   2 
  -1  -7  -6 53.2610 3.83987   1 
  -1  -7  -6 48.1589 7.36391   2 
   1   7   6 52.9494 5.18113   2 
   1   7   6 51.4767 6.18896   2 
  -2  -7  -6 9.52575 1.95736   1 
  -2  -7  -6 1.82512 4.16268   2 
  -2  -7  -6 7.55394 7.41632   2 
   2   7   6 11.6622 4.36328   2 
   2   7   6 9.63202 4.08866   2 
  -3  -7  -6 67.3522 5.69467   1 
  -3  -7  -6 75.3957 9.88534   2 
  -3  -7  -6 79.4008 3.72091   1 
  -3  -7  -6 89.1070 7.85312   2 
   3   7   6 76.0578 9.07028   2 
   3   7   6 69.9059 7.83595   2 
  -4  -7  -6 70.1458 11.2940   2 
  -4  -7  -6 69.0232 6.66678   2 
  -4  -7  -6 55.1192 6.04723   1 
  -4  -7  -6 62.3385 4.45243   1 
   4   7   6 57.2796 7.03629   2 
   4   7   6 47.1144 7.55611   2 
  -5  -7  -6 8.24718 4.21484   1 
  -5  -7  -6 9.09433 12.2464   2 
  -5  -7  -6 4.05328 4.17302   1 
  -5  -7  -6 5.12419 6.24012   2 
   5   7   6 3.75832 7.61661   2 
   5   7   6 -2.9839 7.63610   2 
  -6  -7  -6 9.19719 15.2030   2 
  -6  -7  -6 -1.1269 5.95771   1 
  -6  -7  -6 -2.2302 7.48632   2 
   6   7   6 -15.820 9.58233   2 
   3  -8  -6 0.99143 13.0352   2 
   3  -8  -6 7.98955 5.75063   1 
   3  -8  -6 24.0778 7.55559   2 
  -3   8   6 13.0506 3.35306   1 
  -3   8   6 1.20384 6.26033   2 
  -3   8   6 4.65972 6.42859   2 
   2  -8  -6 -0.5976 9.71746   2 
   2  -8  -6 -0.4812 4.34390   1 
   2  -8  -6 1.54803 6.38378   2 
  -2   8   6 -1.6791 5.46788   2 
  -2   8   6 -0.5494 5.07742   2 
  -2   8   6 -0.4299 3.00375   1 
   1  -8  -6 3.60353 6.18408   2 
   1  -8  -6 0.17532 3.58397   1 
   1  -8  -6 12.7419 7.70818   2 
  -1   8   6 3.63034 5.05589   2 
  -1   8   6 1.92825 2.98575   1 
  -1   8   6 1.44428 4.82022   2 
   0  -8  -6 4.11396 6.49398   2 
   0  -8  -6 -2.6640 3.10205   1 
   0   8   6 0.58868 4.12236   2 
   0   8   6 8.47109 4.95806   2 
   0   8   6 -1.8000 3.24132   1 
  -1  -8  -6 10.2099 5.66094   2 
  -1  -8  -6 5.50272 2.66655   1 
  -1  -8  -6 5.88803 9.44543   2 
   1   8   6 7.74614 5.10245   2 
   1   8   6 4.63890 4.56150   2 
  -2  -8  -6 11.4642 5.55326   2 
  -2  -8  -6 12.5574 11.2810   2 
  -2  -8  -6 16.0122 2.66115   1 
   2   8   6 16.5707 5.36151   2 
   2   8   6 12.9710 5.14892   2 
  -3  -8  -6 3.98132 3.13064   1 
  -3  -8  -6 3.97606 5.53573   2 
   3   8   6 -6.6477 6.11023   2 
   3   8   6 7.36145 5.84353   2 
  -4  -8  -6 47.2764 7.14293   2 
  -4  -8  -6 60.2458 6.78922   1 
  -4  -8  -6 58.3874 14.6041   2 
   4   8   6 40.5757 7.71766   2 
  -5  -8  -6 0.48767 3.22076   1 
  -5  -8  -6 5.13058 4.86232   1 
  -5  -8  -6 -8.8859 14.5812   2 
  -5  -8  -6 0.61021 7.79331   2 
   5   8   6 1.56432 9.64361   2 
   5   8   6 6.37339 8.61528   2 
   1  -9  -6 17.1957 5.30976   1 
   1  -9  -6 19.9650 10.7942   2 
  -1   9   6 13.8451 6.20936   2 
  -1   9   6 10.2649 4.29715   1 
  -1   9   6 12.7144 7.57502   2 
   0  -9  -6 11.1522 9.01533   2 
   0  -9  -6 6.16427 11.1160   2 
   0   9   6 19.6733 6.02431   2 
   0   9   6 11.3997 6.62869   2 
  -1  -9  -6 2.78036 7.50106   2 
   1   9   6 2.85851 7.80799   2 
   1   9   6 0.07501 6.51777   2 
  -2  -9  -6 -13.586 11.0294   2 
  -2  -9  -6 7.38116 7.41527   2 
   2   9   6 0.62169 6.42351   2 
   2   9   6 19.0589 7.58441   2 
  -3  -9  -6 15.7958 7.82870   2 
  -3  -9  -6 17.6022 14.7088   2 
   3   9   6 25.5558 7.61375   2 
   3   9   6 21.5329 10.8799   2 
   2   7  -7 10.2164 5.34848   2 
   2   7  -7 1.14454 7.59759   2 
   1   7  -7 51.7360 8.02395   2 
   1   7  -7 40.3833 4.92687   2 
   0   7  -7 -0.3896 6.72564   2 
   0   7  -7 0.91510 3.51219   2 
   4   6  -7 15.2557 8.43378   2 
   4   6  -7 6.00887 8.13443   2 
  -4  -6   7 -3.5902 4.40892   2 
  -4  -6   7 -9.0573 6.78620   2 
   3   6  -7 8.79617 7.08728   2 
   3   6  -7 -1.4801 5.44250   2 
  -3  -6   7 -1.2585 3.06392   2 
   2   6  -7 81.1748 7.82590   2 
   1   6  -7 14.9213 5.47970   2 
   1   6  -7 -2.9855 3.52395   2 
  -1   6  -7 -0.0891 2.27058   2 
  -2   6  -7 8.63499 3.37797   1 
  -3   6  -7 69.0184 7.32332   1 
   5   5  -7 118.713 13.1236   2 
   5   5  -7 118.773 12.3986   2 
  -5  -5   7 95.7576 9.30933   2 
  -5  -5   7 117.060 12.5425   2 
   4   5  -7 112.683 12.2919   2 
   4   5  -7 100.763 11.7964   2 
  -4  -5   7 95.6682 6.98814   2 
  -4  -5   7 86.9387 10.1143   2 
   3   5  -7 15.3150 5.61349   2 
   3   5  -7 18.4077 5.40697   2 
  -3  -5   7 14.9184 3.07117   2 
   2   5  -7 163.708 8.98178   2 
   2   5  -7 158.369 9.62875   2 
   1   5  -7 10.9367 4.60591   2 
  -2   5  -7 45.8046 4.79463   1 
  -3   5  -7 1.92245 3.19709   1 
  -4   5  -7 15.1090 4.37082   1 
   6   4  -7 126.578 14.5678   2 
   6   4  -7 145.677 16.0514   2 
   6   4  -7 157.314 9.99362   1 
  -6  -4   7 142.700 16.7803   2 
  -6  -4   7 156.838 6.24707   1 
   5   4  -7 247.232 17.2851   2 
   5   4  -7 238.763 13.9759   2 
   5   4  -7 256.165 9.40422   1 
  -5  -4   7 239.725 11.1971   2 
  -5  -4   7 261.554 13.6828   2 
  -5  -4   7 246.944 7.25094   1 
   4   4  -7 74.3473 8.88783   2 
  -4  -4   7 74.5582 6.55128   2 
  -4  -4   7 76.4864 3.99826   1 
  -4  -4   7 80.8837 8.49935   2 
   3   4  -7 27.7937 5.54640   2 
   3   4  -7 28.9383 5.37698   2 
  -3  -4   7 27.3080 4.46320   2 
  -3  -4   7 29.4315 3.26898   2 
   2   4  -7 18.5456 4.26574   2 
   2   4  -7 19.2720 4.75290   2 
   1   4  -7 96.3652 6.46311   2 
  -1   4  -7 26.4786 2.74348   1 
  -2   4  -7 69.8322 4.98809   1 
  -3   4  -7 13.1592 3.22359   1 
  -4   4  -7 2.50536 3.61119   1 
  -4   4  -7 -2.1114 3.51778   2 
  -5   4  -7 37.8928 6.71116   2 
  -5   4  -7 44.6056 5.96421   1 
   6   3  -7 5.87964 11.4339   2 
   6   3  -7 6.30322 7.65079   2 
   6   3  -7 1.01084 4.51795   1 
  -6  -3   7 5.84802 8.53614   2 
  -6  -3   7 0.04060 2.60407   1 
  -6  -3   7 3.72287 6.97556   2 
   5   3  -7 11.8194 9.03692   2 
   5   3  -7 2.54487 5.66693   2 
   5   3  -7 5.82551 3.56241   1 
  -5  -3   7 7.93075 2.23518   1 
  -5  -3   7 -2.5259 4.31923   2 
  -5  -3   7 7.81316 5.87304   2 
   4   3  -7 27.6733 3.29575   1 
   4   3  -7 22.4732 4.79491   2 
  -4  -3   7 14.7378 4.18972   2 
  -4  -3   7 26.3878 2.71625   1 
  -4  -3   7 27.4780 5.09690   2 
   3   3  -7 47.3102 5.36950   2 
   3   3  -7 55.0754 6.19377   2 
   3   3  -7 45.8368 3.54161   1 
  -3  -3   7 43.7462 2.98096   1 
  -3  -3   7 50.0911 4.47306   2 
  -3  -3   7 45.2322 6.83972   2 
   2   3  -7 -0.7394 3.62270   2 
   2   3  -7 1.43816 1.24515   1 
   2   3  -7 1.01143 2.95921   2 
   1   3  -7 14.5773 1.37154   1 
   0   3  -7 265.526 7.47386   1 
   0   3  -7 257.888 6.69649   1 
  -1   3  -7 62.5810 3.78208   1 
  -2   3  -7 12.2300 2.41853   1 
  -3   3  -7 11.6980 2.99000   1 
  -4   3  -7 43.6810 5.22424   2 
  -4   3  -7 35.1444 5.12481   2 
  -5   3  -7 73.7263 7.14568   1 
  -5   3  -7 83.4749 8.32296   2 
  -5   3  -7 73.1167 7.75323   2 
  -6   3  -7 5.13976 6.02566   2 
  -6   3  -7 8.39025 5.53444   1 
  -6   3  -7 -0.2154 8.67715   2 
   6  -3   7 -1.5629 5.14656   1 
   7   2  -7 10.5189 6.15409   1 
   7   2  -7 -6.7062 14.5753   2 
   7   2  -7 2.36891 8.36837   2 
  -7  -2   7 9.04878 11.4986   2 
  -7  -2   7 -3.5593 3.41122   1 
  -7  -2   7 4.09787 9.53069   2 
   6   2  -7 7.14093 4.33031   1 
   6   2  -7 2.53035 10.8662   2 
   6   2  -7 3.68395 6.38753   2 
  -6  -2   7 1.11124 6.93572   2 
  -6  -2   7 1.50043 2.57035   1 
  -6  -2   7 3.07926 7.79396   2 
   5   2  -7 194.445 10.6598   2 
   5   2  -7 194.737 8.34644   1 
  -5  -2   7 186.446 11.2123   2 
  -5  -2   7 183.457 6.26714   1 
   4   2  -7 5.35097 2.29200   1 
   4   2  -7 -3.1856 3.54450   2 
   4   2  -7 -0.8343 6.40532   2 
  -4  -2   7 3.54595 1.53916   1 
  -4  -2   7 5.49052 3.62354   2 
  -4  -2   7 7.58807 4.11283   2 
   3   2  -7 34.3280 4.23043   2 
   3   2  -7 31.9452 5.38888   2 
   3   2  -7 31.9243 3.09992   1 
  -3  -2   7 34.7923 3.80810   2 
  -3  -2   7 38.5704 3.79394   2 
  -3  -2   7 32.7388 2.58005   1 
   2   2  -7 92.9456 3.41259   1 
   2   2  -7 85.9865 6.81112   2 
   2   2  -7 90.6477 5.29048   2 
  -2  -2   7 92.6034 4.13833   2 
  -2  -2   7 88.4210 3.56095   1 
   1   2  -7 3.47579 0.90500   1 
   0   2  -7 18.2983 1.89426   1 
  -1   2  -7 30.6193 2.88487   1 
  -2   2  -7 44.2192 3.58602   1 
  -3   2  -7 7.41308 2.33480   1 
  -4   2  -7 8.22297 2.87946   2 
  -4   2  -7 6.30497 2.90397   1 
  -4   2  -7 4.65208 4.84891   2 
  -5   2  -7 34.1514 5.12311   2 
  -5   2  -7 24.2388 4.31154   1 
  -5   2  -7 22.6367 6.88153   2 
   5  -2   7 23.3871 4.27907   1 
  -6   2  -7 -2.2378 4.15221   1 
  -6   2  -7 7.15742 5.50884   2 
  -6   2  -7 -10.764 8.85992   2 
   6  -2   7 0.41104 4.19852   1 
   7   1  -7 31.9245 14.9693   2 
   7   1  -7 34.0314 7.77468   2 
   7   1  -7 40.0648 6.73606   1 
  -7  -1   7 19.6648 9.73914   2 
  -7  -1   7 40.7388 11.1440   2 
  -7  -1   7 24.1370 4.09242   1 
   6   1  -7 38.3080 5.27588   1 
   6   1  -7 35.7837 6.38386   2 
   6   1  -7 32.5749 12.8624   2 
  -6  -1   7 26.2974 3.16437   1 
  -6  -1   7 33.0484 7.24720   2 
  -6  -1   7 48.8593 7.80400   2 
   5   1  -7 61.1429 9.71595   2 
   5   1  -7 61.4115 5.95456   2 
   5   1  -7 53.5069 5.71276   1 
  -5  -1   7 48.0850 3.59614   1 
  -5  -1   7 51.8069 6.52757   2 
  -5  -1   7 51.8819 6.74514   2 
   4   1  -7 0.72679 2.00825   1 
   4   1  -7 -0.7345 3.19785   2 
   4   1  -7 0.64082 6.02661   2 
  -4  -1   7 -1.1091 1.33799   1 
  -4  -1   7 -1.1713 3.99463   2 
   3   1  -7 57.3868 6.26179   2 
   3   1  -7 51.8877 3.50120   1 
   3   1  -7 56.9900 4.92753   2 
  -3  -1   7 58.6709 4.82654   2 
  -3  -1   7 49.9360 4.70958   2 
  -3  -1   7 52.2636 2.67615   1 
   2   1  -7 30.2339 3.17443   2 
   2   1  -7 36.7700 4.37812   2 
   2   1  -7 34.7088 2.32797   1 
  -2  -1   7 38.2525 3.68795   2 
  -2  -1   7 34.3026 2.34387   1 
  -2  -1   7 29.9626 3.26001   2 
   1   1  -7 177.950 4.72766   1 
   1   1  -7 169.757 6.40219   2 
  -1  -1   7 178.900 5.37513   1 
   0   1  -7 0.27837 0.98365   1 
  -2   1  -7 48.2430 3.44352   1 
  -3   1  -7 5.91556 2.06328   1 
  -4   1  -7 4.73719 4.72567   2 
  -4   1  -7 0.26619 2.33527   1 
  -4   1  -7 5.26653 2.78352   2 
  -5   1  -7 34.9103 7.18874   2 
  -5   1  -7 26.8583 4.41851   2 
  -5   1  -7 30.6714 4.31356   1 
   5  -1   7 28.1475 4.05662   1 
  -6   1  -7 9.64939 5.28239   2 
  -6   1  -7 -6.8174 8.51129   2 
   6  -1   7 1.03096 3.65546   1 
  -7   1  -7 18.5860 7.87895   2 
  -7   1  -7 27.8689 12.0404   2 
  -7   1  -7 19.9875 5.88393   1 
   7  -1   7 18.6706 5.34739   1 
   7  -1   7 18.2739 3.64749   2 
   7   0  -7 8.47901 5.82181   1 
   7   0  -7 10.0225 15.0800   2 
   7   0  -7 5.30427 6.99360   2 
  -7   0   7 7.10109 10.0349   2 
  -7   0   7 5.50837 3.62589   1 
  -7   0   7 15.2552 9.59150   2 
   6   0  -7 -1.4697 4.21930   1 
   6   0  -7 2.28686 5.09256   2 
   6   0  -7 -7.8102 10.6508   2 
  -6   0   7 -3.7028 6.33840   2 
  -6   0   7 -5.6206 6.72282   2 
  -6   0   7 -1.0486 2.68683   1 
   5   0  -7 2.47451 3.65594   1 
   5   0  -7 1.68006 7.48639   2 
   5   0  -7 4.36005 3.89894   2 
  -5   0   7 -3.1930 2.56787   1 
  -5   0   7 1.46838 4.82276   2 
   4   0  -7 3.14765 5.57087   2 
   4   0  -7 -1.7520 2.18855   1 
   4   0  -7 -1.0300 2.93706   2 
  -4   0   7 -0.3843 1.34360   1 
  -4   0   7 3.62603 3.78336   2 
  -4   0   7 -1.9160 3.50015   2 
   3   0  -7 10.3054 4.20038   2 
   3   0  -7 7.91716 2.49225   2 
   3   0  -7 8.11134 1.76285   1 
  -3   0   7 10.4585 2.73270   2 
  -3   0   7 -0.8214 2.47559   2 
  -3   0   7 9.13447 1.39609   1 
   2   0  -7 71.9538 3.05751   1 
   2   0  -7 70.0122 5.63823   2 
   2   0  -7 68.4935 3.95415   2 
  -2   0   7 71.2842 2.83365   1 
  -2   0   7 63.9568 4.22130   2 
  -2   0   7 69.0480 3.81189   2 
   1   0  -7 1207.60 26.2967   2 
   1   0  -7 1188.89 26.9639   2 
   1   0  -7 1221.07 26.0033   1 
  -1   0   7 1232.13 26.3832   1 
   0   0  -7 894.386 19.6132   1 
  -1   0  -7 299.841 8.00750   1 
  -2   0  -7 38.3173 3.01273   1 
  -3   0  -7 146.216 5.73925   1 
  -3   0  -7 142.235 5.29817   2 
  -4   0  -7 1.91175 1.98281   1 
  -4   0  -7 5.53520 2.93295   2 
  -4   0  -7 -5.6021 4.52058   2 
  -5   0  -7 14.6232 4.20791   2 
  -5   0  -7 14.7521 7.24435   2 
  -5   0  -7 12.9510 3.01077   1 
  -6   0  -7 17.6143 5.54149   2 
  -6   0  -7 22.6806 8.97198   2 
  -6   0  -7 26.7182 4.22047   1 
   6   0   7 25.4126 3.46742   2 
   6   0   7 14.4473 5.81771   2 
   6   0   7 19.7012 4.25491   1 
  -7   0  -7 -3.7357 6.73241   2 
  -7   0  -7 -16.351 11.2572   2 
  -7   0  -7 2.51425 4.45029   1 
   7   0   7 -2.0619 3.81153   2 
   7   0   7 4.15758 4.41173   1 
   7   0   7 4.33555 8.27152   2 
   7  -1  -7 15.4479 7.21300   2 
   7  -1  -7 11.6940 5.66271   1 
  -7   1   7 12.6698 9.82218   2 
  -7   1   7 25.4490 9.64804   2 
  -7   1   7 10.9599 3.89509   1 
   6  -1  -7 23.4404 11.1887   2 
   6  -1  -7 19.0383 5.44327   2 
   6  -1  -7 20.0628 4.41504   1 
  -6   1   7 34.3189 7.25370   2 
  -6   1   7 21.2522 2.98301   1 
  -6   1   7 21.9898 7.31685   2 
   5  -1  -7 8.12217 3.26753   1 
   5  -1  -7 8.00122 4.12773   2 
   5  -1  -7 -4.0495 7.78672   2 
  -5   1   7 7.63642 5.16779   2 
  -5   1   7 6.81282 5.13985   2 
  -5   1   7 9.09439 2.15657   1 
   4  -1  -7 32.7987 4.01613   1 
   4  -1  -7 37.0358 3.99944   2 
   4  -1  -7 34.4434 7.02198   2 
  -4   1   7 33.7764 2.75270   1 
  -4   1   7 38.3261 4.93827   2 
  -4   1   7 42.5355 4.63287   2 
   3  -1  -7 63.0095 4.42155   2 
   3  -1  -7 62.9463 6.17226   2 
   3  -1  -7 64.1569 3.51797   1 
  -3   1   7 60.5008 2.80779   1 
  -3   1   7 61.3044 5.18602   2 
  -3   1   7 59.4133 4.76025   2 
   2  -1  -7 2.41950 2.85293   2 
   2  -1  -7 1.67770 1.45535   2 
   2  -1  -7 0.17379 1.04740   1 
  -2   1   7 -1.7736 1.51039   2 
  -2   1   7 0.85924 0.88602   1 
  -2   1   7 2.77822 1.62613   2 
   1  -1  -7 13.7826 1.56251   1 
   1  -1  -7 15.2720 2.39670   2 
   1  -1  -7 11.6494 1.66380   2 
  -1   1   7 15.6460 1.75534   1 
  -1   1   7 14.7095 1.52030   2 
  -1   1   7 14.8920 1.94549   2 
   0  -1  -7 130.858 3.99062   1 
   0  -1  -7 129.849 3.85476   2 
   0  -1  -7 129.065 4.10184   2 
   0   1   7 131.070 4.43759   1 
  -1  -1  -7 1474.33 31.0882   2 
  -1  -1  -7 1475.32 32.0199   1 
  -2  -1  -7 6.13353 1.65707   2 
  -2  -1  -7 12.3117 2.39629   2 
  -2  -1  -7 8.70083 1.77914   1 
  -3  -1  -7 160.421 5.71406   2 
  -3  -1  -7 156.369 7.75202   2 
  -3  -1  -7 150.397 5.94758   1 
  -4  -1  -7 41.1450 5.49859   2 
  -4  -1  -7 42.8880 4.14715   1 
  -4  -1  -7 48.5314 5.04443   2 
   4   1   7 44.4855 5.11567   2 
   4   1   7 42.9556 3.79116   2 
  -5  -1  -7 115.968 11.5789   2 
  -5  -1  -7 134.068 7.57901   2 
  -5  -1  -7 98.1360 7.59513   1 
   5   1   7 134.625 5.96421   2 
   5   1   7 114.353 8.11915   2 
  -6  -1  -7 136.569 9.98851   2 
  -6  -1  -7 129.200 7.52030   1 
  -6  -1  -7 130.684 11.5315   2 
   6   1   7 125.400 7.03651   2 
   6   1   7 129.969 10.6245   2 
  -7  -1  -7 2.25227 4.21184   1 
  -7  -1  -7 -5.1421 6.82905   2 
  -7  -1  -7 -2.7082 10.6724   2 
   7   1   7 -2.1261 4.17863   1 
   7   1   7 -2.5067 3.95445   2 
   7   1   7 -9.4814 7.82323   2 
   7  -2  -7 5.61478 6.39128   2 
   7  -2  -7 8.95077 16.4584   2 
   7  -2  -7 -2.0199 5.16520   1 
  -7   2   7 9.54177 10.4581   2 
  -7   2   7 -17.954 9.79003   2 
  -7   2   7 -1.0592 3.38962   1 
   6  -2  -7 19.9622 5.11438   2 
   6  -2  -7 7.74719 4.12911   1 
   6  -2  -7 8.18722 11.6405   2 
  -6   2   7 11.5831 7.24007   2 
  -6   2   7 15.4731 7.29872   2 
  -6   2   7 15.0967 2.88294   1 
   5  -2  -7 96.7055 6.22866   1 
   5  -2  -7 106.463 7.18477   2 
   5  -2  -7 89.7895 10.9090   2 
  -5   2   7 98.1935 9.26109   2 
  -5   2   7 102.552 4.69124   1 
  -5   2   7 88.2355 8.93060   2 
   4  -2  -7 7.80919 6.36459   2 
   4  -2  -7 5.38635 2.37805   1 
   4  -2  -7 10.7967 2.81545   2 
  -4   2   7 4.64253 3.48979   2 
  -4   2   7 16.8447 4.23840   2 
  -4   2   7 5.41088 1.72523   1 
   3  -2  -7 -2.3909 1.67288   1 
   3  -2  -7 0.27967 1.98802   2 
   3  -2  -7 5.71092 4.18188   2 
  -3   2   7 1.80584 2.56951   2 
  -3   2   7 -1.7050 0.97801   1 
  -3   2   7 -0.3701 2.49439   2 
   2  -2  -7 28.0143 4.09418   2 
   2  -2  -7 31.8595 2.46746   1 
   2  -2  -7 29.3944 3.00128   2 
  -2   2   7 35.8007 3.30722   2 
  -2   2   7 30.5844 2.01303   1 
  -2   2   7 32.3309 3.72593   2 
   1  -2  -7 22.2740 1.86518   1 
   1  -2  -7 21.7870 2.19936   2 
   1  -2  -7 24.8544 2.84637   2 
  -1   2   7 21.6567 2.15413   2 
  -1   2   7 22.5192 1.85347   1 
   0  -2  -7 11.0498 1.24442   1 
   0  -2  -7 12.5058 1.91882   2 
   0  -2  -7 11.5796 1.71250   2 
   0   2   7 11.7566 1.42812   2 
   0   2   7 9.40546 1.29259   2 
   0   2   7 9.24683 1.50064   1 
  -1  -2  -7 17.9779 2.16349   2 
  -1  -2  -7 18.1693 2.09819   2 
  -1  -2  -7 18.6389 2.08418   1 
   1   2   7 16.8563 1.86902   2 
   1   2   7 19.1313 2.23127   2 
  -2  -2  -7 -1.0724 1.46954   2 
  -2  -2  -7 -0.1715 2.86598   2 
   2   2   7 -2.1057 1.26869   2 
   2   2   7 -1.3919 1.56240   2 
  -3  -2  -7 402.644 12.5190   2 
  -3  -2  -7 390.678 11.0963   1 
  -3  -2  -7 378.879 10.4900   2 
   3   2   7 403.112 10.6109   2 
   3   2   7 403.920 10.4595   2 
  -4  -2  -7 2.92818 2.06659   1 
  -4  -2  -7 4.07997 3.02082   2 
  -4  -2  -7 -2.5518 5.26179   2 
   4   2   7 -3.4019 2.88373   2 
   4   2   7 0.80234 2.18106   2 
  -5  -2  -7 175.786 7.91259   1 
  -5  -2  -7 170.432 12.0856   2 
  -5  -2  -7 180.671 8.57813   2 
   5   2   7 167.745 7.28539   2 
   5   2   7 154.934 9.10876   2 
  -6  -2  -7 2.74745 3.18351   1 
  -6  -2  -7 2.12477 8.60965   2 
  -6  -2  -7 14.2072 5.53277   2 
   6   2   7 6.28487 6.10105   2 
   6   2   7 1.31223 4.06105   2 
  -7  -2  -7 28.8052 5.40399   1 
  -7  -2  -7 38.2978 11.2916   2 
  -7  -2  -7 47.4285 8.51946   2 
   7   2   7 38.1489 5.74194   2 
   7   2   7 40.0789 8.98756   2 
   6  -3  -7 -3.2857 12.9695   2 
   6  -3  -7 2.69608 4.74373   2 
   6  -3  -7 1.59985 4.70795   1 
  -6   3   7 -14.735 6.85382   2 
  -6   3   7 -0.8655 7.21532   2 
  -6   3   7 -4.0832 2.65032   1 
   5  -3  -7 53.4918 6.41078   2 
   5  -3  -7 66.0462 10.4411   2 
   5  -3  -7 40.0675 4.45555   1 
  -5   3   7 46.1830 6.34104   2 
  -5   3   7 46.0415 6.91623   2 
  -5   3   7 40.3400 3.67365   1 
   4  -3  -7 90.3338 5.74595   2 
   4  -3  -7 84.0655 5.33654   1 
   4  -3  -7 86.2468 9.27654   2 
  -4   3   7 79.8779 4.07843   1 
  -4   3   7 88.3961 7.47193   2 
  -4   3   7 80.7620 7.52115   2 
   3  -3  -7 18.7740 2.75961   2 
   3  -3  -7 19.3744 5.24241   2 
   3  -3  -7 15.9392 2.50873   1 
  -3   3   7 20.0263 3.41715   2 
  -3   3   7 20.2286 2.16144   1 
  -3   3   7 22.8412 3.60709   2 
   2  -3  -7 0.54413 3.51066   2 
   2  -3  -7 -0.8091 1.22943   1 
   2  -3  -7 1.76849 1.54989   2 
  -2   3   7 -1.4841 1.85682   2 
  -2   3   7 -0.1834 2.10951   2 
  -2   3   7 1.48451 0.96038   1 
   1  -3  -7 17.7850 1.83083   1 
   1  -3  -7 20.0089 2.93330   2 
   1  -3  -7 19.2280 2.01447   2 
  -1   3   7 11.7361 2.08993   2 
  -1   3   7 16.8255 1.92437   2 
   0  -3  -7 117.472 4.62034   2 
   0  -3  -7 116.673 4.58100   2 
   0  -3  -7 118.226 3.66542   1 
   0   3   7 118.727 4.19585   2 
   0   3   7 109.014 5.70355   2 
   0   3   7 118.836 4.09123   1 
  -1  -3  -7 33.5894 2.34474   1 
  -1  -3  -7 39.1566 3.50206   2 
  -1  -3  -7 36.9887 2.94592   2 
   1   3   7 39.2372 2.85227   2 
  -2  -3  -7 87.6760 4.07347   1 
  -2  -3  -7 90.2002 5.79302   2 
  -2  -3  -7 88.3738 4.10115   2 
   2   3   7 87.0938 4.19163   2 
  -3  -3  -7 3.97093 2.26662   2 
  -3  -3  -7 6.75259 1.82362   1 
  -3  -3  -7 -0.7357 3.70103   2 
   3   3   7 6.04006 2.26194   2 
   3   3   7 6.75445 2.36609   2 
  -4  -3  -7 18.9008 5.47378   2 
  -4  -3  -7 19.5266 3.59020   2 
  -4  -3  -7 30.4253 3.75373   1 
   4   3   7 30.7224 3.74872   2 
  -5  -3  -7 25.7884 3.59597   1 
  -5  -3  -7 28.2372 7.11136   2 
  -5  -3  -7 20.0033 4.90159   2 
   5   3   7 15.6485 4.14319   2 
  -6  -3  -7 7.28211 3.49698   1 
  -6  -3  -7 12.0761 9.20487   2 
  -6  -3  -7 15.7340 6.31134   2 
   6   3   7 -1.7713 5.94558   2 
   6   3   7 7.42406 4.79517   2 
  -7  -3  -7 89.6402 9.54618   2 
  -7  -3  -7 53.1795 6.82369   1 
  -7  -3  -7 66.2259 13.0870   2 
   7   3   7 56.5647 7.52438   2 
   6  -4  -7 30.4470 15.3795   2 
   6  -4  -7 32.3098 6.12832   1 
   6  -4  -7 33.3071 5.76979   2 
  -6   4   7 33.3277 8.45993   2 
  -6   4   7 34.8836 9.13279   2 
  -6   4   7 28.8390 3.39323   1 
   5  -4  -7 46.8971 11.3040   2 
   5  -4  -7 42.1507 5.10320   1 
   5  -4  -7 41.8903 4.95702   2 
  -5   4   7 34.7741 3.12810   1 
  -5   4   7 46.2327 6.47141   2 
  -5   4   7 36.0031 7.08058   2 
   4  -4  -7 51.1790 5.21882   2 
   4  -4  -7 38.9148 8.67961   2 
   4  -4  -7 47.3110 5.05750   1 
  -4   4   7 46.1340 5.16792   2 
  -4   4   7 47.0776 5.74100   2 
  -4   4   7 41.8519 3.28482   1 
   3  -4  -7 -0.8543 2.27230   2 
   3  -4  -7 -0.4080 5.84122   2 
   3  -4  -7 -0.4895 2.19935   1 
  -3   4   7 1.64268 3.27066   2 
  -3   4   7 0.65832 2.91169   2 
  -3   4   7 1.47103 1.32756   1 
   2  -4  -7 74.2257 7.40613   2 
   2  -4  -7 70.9266 4.26517   2 
   2  -4  -7 73.2160 3.93668   1 
  -2   4   7 73.8439 3.16989   1 
  -2   4   7 70.0260 5.19008   2 
  -2   4   7 62.1601 4.71129   2 
   1  -4  -7 58.2933 5.46287   2 
   1  -4  -7 56.3462 3.05431   1 
   1  -4  -7 53.0435 4.00573   2 
  -1   4   7 55.4019 3.69887   2 
  -1   4   7 54.7490 4.06061   2 
  -1   4   7 51.7735 2.81338   1 
   0  -4  -7 7.78767 2.13181   2 
   0  -4  -7 7.88691 1.38023   1 
   0  -4  -7 6.45296 2.35983   2 
   0   4   7 6.50852 1.94037   2 
   0   4   7 5.05809 1.44366   1 
   0   4   7 5.30182 1.88161   2 
  -1  -4  -7 246.071 6.51653   1 
  -1  -4  -7 241.586 8.29570   2 
  -1  -4  -7 238.538 7.40095   2 
   1   4   7 254.123 7.60396   2 
   1   4   7 240.476 7.34419   2 
  -2  -4  -7 59.5972 4.25750   2 
  -2  -4  -7 59.7517 3.43721   1 
  -2  -4  -7 65.5280 6.29525   2 
   2   4   7 59.3481 4.45001   2 
   2   4   7 58.1663 4.39674   2 
  -3  -4  -7 4.56258 1.97987   1 
  -3  -4  -7 -0.3696 4.38888   2 
  -3  -4  -7 -0.2025 2.55716   2 
   3   4   7 -0.1422 2.86441   2 
   3   4   7 2.81261 2.77526   2 
  -4  -4  -7 2.86878 3.33056   2 
  -4  -4  -7 3.23636 5.96720   2 
  -4  -4  -7 3.43839 2.17499   1 
   4   4   7 10.7732 3.69762   2 
  -5  -4  -7 72.0745 7.98163   2 
  -5  -4  -7 70.0236 5.97111   1 
  -5  -4  -7 82.6023 9.53129   2 
   5   4   7 76.2009 7.89244   2 
   5   4   7 62.8387 6.82098   2 
  -6  -4  -7 -5.5231 6.29271   2 
  -6  -4  -7 5.84047 9.76277   2 
  -6  -4  -7 3.34742 4.09988   1 
   6   4   7 -0.5530 7.01558   2 
   6   4   7 -0.2946 5.52056   2 
  -7  -4  -7 -3.6668 5.49817   1 
  -7  -4  -7 3.10253 13.5529   2 
  -7  -4  -7 3.99458 7.94989   2 
   7   4   7 8.41757 7.84998   2 
   7   4   7 -26.690 9.35802   2 
   5  -5  -7 80.3321 14.4350   2 
   5  -5  -7 73.2689 8.95312   1 
   5  -5  -7 92.4941 8.03181   2 
  -5   5   7 75.8304 5.33154   1 
  -5   5   7 83.6891 7.85867   2 
  -5   5   7 80.3910 8.76023   2 
   4  -5  -7 14.9167 3.99833   1 
   4  -5  -7 25.9812 9.12803   2 
   4  -5  -7 23.7748 4.09765   2 
  -4   5   7 24.2780 2.79000   1 
  -4   5   7 29.6738 5.05001   2 
  -4   5   7 25.7749 5.41044   2 
   3  -5  -7 29.4005 7.08486   1 
   3  -5  -7 57.9355 5.11465   2 
   3  -5  -7 59.4881 8.12962   2 
  -3   5   7 61.8946 6.75641   2 
  -3   5   7 54.1667 5.92965   2 
   2  -5  -7 40.0243 4.71387   2 
   2  -5  -7 22.1294 3.06716   1 
   2  -5  -7 30.3367 5.69700   2 
  -2   5   7 32.5422 3.64514   2 
  -2   5   7 33.9464 2.87152   1 
  -2   5   7 31.1960 3.91065   2 
   1  -5  -7 39.7687 3.90989   2 
   1  -5  -7 39.1718 3.18258   1 
   1  -5  -7 34.4912 4.48997   2 
  -1   5   7 37.0211 3.65019   2 
  -1   5   7 33.3521 3.28494   2 
  -1   5   7 38.8576 2.88104   1 
   0  -5  -7 289.797 7.62887   1 
   0  -5  -7 285.258 9.28032   2 
   0  -5  -7 296.343 9.56399   2 
   0   5   7 287.840 8.82763   2 
   0   5   7 288.980 8.00439   1 
   0   5   7 283.021 8.70274   2 
  -1  -5  -7 18.8347 3.14249   2 
  -1  -5  -7 17.1137 1.77905   1 
   1   5   7 19.0171 2.87307   2 
   1   5   7 19.3654 2.86628   2 
  -2  -5  -7 4.29433 2.73350   2 
  -2  -5  -7 3.42218 4.71580   2 
  -2  -5  -7 3.63015 1.69087   1 
   2   5   7 5.31513 2.52114   2 
   2   5   7 7.80908 2.86126   2 
  -3  -5  -7 -3.3437 5.42861   2 
  -3  -5  -7 1.15173 2.25728   1 
  -3  -5  -7 1.36779 2.16754   1 
  -3  -5  -7 -0.5746 2.92808   2 
   3   5   7 -0.0992 3.29798   2 
   3   5   7 -6.6449 3.01690   2 
  -4  -5  -7 5.52553 3.89599   2 
  -4  -5  -7 6.05487 6.90433   2 
  -4  -5  -7 10.9767 3.13294   1 
   4   5   7 2.51922 4.62033   2 
   4   5   7 7.17518 4.41949   2 
  -5  -5  -7 29.8585 4.13421   1 
  -5  -5  -7 25.8029 9.38170   2 
  -5  -5  -7 21.6326 5.43878   2 
   5   5   7 27.3862 6.02821   2 
  -6  -5  -7 18.7901 4.96621   1 
  -6  -5  -7 24.4819 11.6365   2 
  -6  -5  -7 12.9547 6.43592   2 
   6   5   7 19.7165 7.09337   2 
   6   5   7 14.9701 8.04436   2 
  -7  -5  -7 3.89046 15.2520   2 
  -7  -5  -7 9.35752 5.87402   1 
  -7  -5  -7 -2.7436 8.85807   2 
   7   5   7 3.99506 8.59576   2 
   7   5   7 12.8444 10.8173   2 
   5  -6  -7 22.8833 6.46613   1 
   5  -6  -7 32.3914 5.97518   2 
   5  -6  -7 17.2596 15.7408   2 
  -5   6   7 25.6861 3.97957   1 
  -5   6   7 24.7424 12.4714   2 
   4  -6  -7 17.1178 5.11869   2 
   4  -6  -7 12.3971 4.91585   1 
   4  -6  -7 1.62908 11.1221   2 
  -4   6   7 1.32444 5.27318   2 
  -4   6   7 11.8906 6.00921   2 
  -4   6   7 15.6868 2.95747   1 
   3  -6  -7 4.08122 8.51143   2 
   3  -6  -7 23.3891 4.16186   2 
   3  -6  -7 16.2227 3.92301   1 
  -3   6   7 20.8955 2.71182   1 
  -3   6   7 22.1272 4.50782   2 
  -3   6   7 19.5218 4.70356   2 
   2  -6  -7 2.17642 2.96901   1 
   2  -6  -7 0.88736 6.08791   2 
   2  -6  -7 7.49585 3.64747   2 
  -2   6   7 -1.6685 3.53660   2 
  -2   6   7 5.96053 1.95234   1 
  -2   6   7 5.87818 3.52150   2 
   1  -6  -7 82.0929 8.24530   2 
   1  -6  -7 75.9294 4.68171   1 
   1  -6  -7 74.4824 6.39908   2 
  -1   6   7 76.0619 5.71594   2 
  -1   6   7 78.2347 4.08616   1 
  -1   6   7 76.3942 5.74694   2 
   0  -6  -7 86.6261 7.10294   2 
   0  -6  -7 101.753 4.44162   1 
   0  -6  -7 94.3602 7.37196   2 
   0   6   7 99.7619 5.83028   2 
   0   6   7 98.0654 4.71424   1 
   0   6   7 103.028 6.31638   2 
  -1  -6  -7 17.5887 3.69217   2 
  -1  -6  -7 17.6916 2.09029   1 
   1   6   7 16.4008 3.48389   2 
   1   6   7 14.2239 3.39347   2 
  -2  -6  -7 128.575 10.9464   2 
  -2  -6  -7 125.472 7.09598   2 
  -2  -6  -7 129.426 4.50514   1 
   2   6   7 136.198 7.08196   2 
   2   6   7 127.933 7.53091   2 
  -3  -6  -7 -5.4761 6.44360   2 
  -3  -6  -7 1.50300 3.79668   2 
  -3  -6  -7 -0.5549 2.02391   1 
  -3  -6  -7 -3.6679 2.82915   1 
   3   6   7 1.06621 3.75684   2 
   3   6   7 -5.5858 4.09092   2 
  -4  -6  -7 17.0564 8.70046   2 
  -4  -6  -7 30.8955 3.79218   1 
  -4  -6  -7 25.4168 3.71951   1 
  -4  -6  -7 18.1273 4.86130   2 
   4   6   7 14.6371 6.16581   2 
   4   6   7 17.0850 5.55069   2 
  -5  -6  -7 -7.0448 9.60945   2 
  -5  -6  -7 -1.8224 5.30816   2 
  -5  -6  -7 -2.2610 3.56964   1 
   5   6   7 2.01992 6.15398   2 
   5   6   7 15.5210 6.27737   2 
  -6  -6  -7 14.3173 5.13079   1 
  -6  -6  -7 17.9442 13.5261   2 
  -6  -6  -7 2.99772 6.68900   2 
   6   6   7 -4.7334 8.10347   2 
   4  -7  -7 16.2927 6.46272   1 
   4  -7  -7 9.96739 6.19932   2 
   4  -7  -7 23.9473 14.0149   2 
  -4   7   7 16.6932 6.93038   2 
  -4   7   7 13.5248 7.62378   2 
  -4   7   7 12.5297 3.68957   1 
   3  -7  -7 -3.0468 4.45580   1 
   3  -7  -7 1.49604 5.11013   2 
   3  -7  -7 -1.4738 10.1447   2 
  -3   7   7 3.09360 5.58831   2 
  -3   7   7 5.54270 2.81467   1 
  -3   7   7 6.26647 4.94656   2 
   2  -7  -7 2.10404 5.24422   2 
   2  -7  -7 1.41855 4.36146   1 
   2  -7  -7 -1.5347 7.61110   2 
  -2   7   7 3.54730 4.45734   2 
  -2   7   7 3.05789 4.16697   2 
  -2   7   7 2.32940 2.92768   1 
   1  -7  -7 7.23724 3.11653   1 
   1  -7  -7 14.2266 6.24662   2 
   1  -7  -7 8.11086 4.77216   2 
  -1   7   7 9.76476 4.30063   2 
  -1   7   7 10.7855 2.54390   1 
  -1   7   7 9.77033 3.97566   2 
   0  -7  -7 11.3914 4.94043   2 
   0  -7  -7 14.4512 2.76106   1 
   0  -7  -7 8.02723 5.16873   2 
   0   7   7 11.7015 3.08250   1 
   0   7   7 16.0124 4.24917   2 
   0   7   7 12.6348 3.63024   2 
  -1  -7  -7 14.8098 2.37038   1 
  -1  -7  -7 7.84006 6.69192   2 
  -1  -7  -7 13.2265 4.56134   2 
   1   7   7 16.1440 4.05655   2 
   1   7   7 23.2144 4.47859   2 
  -2  -7  -7 2.49080 6.86465   2 
  -2  -7  -7 7.02767 4.12882   2 
  -2  -7  -7 10.4696 2.17201   1 
   2   7   7 12.2482 4.22047   2 
   2   7   7 12.6852 4.43693   2 
  -3  -7  -7 2.76457 4.35434   2 
  -3  -7  -7 -2.3544 3.09541   1 
  -3  -7  -7 -15.402 7.79310   2 
  -3  -7  -7 2.01256 1.93439   1 
   3   7   7 -3.9642 5.17433   2 
   3   7   7 -0.8671 4.59201   2 
  -4  -7  -7 20.2610 4.16395   1 
  -4  -7  -7 21.0334 5.90838   2 
  -4  -7  -7 23.0391 3.18696   1 
  -4  -7  -7 22.2913 10.3060   2 
   4   7   7 4.73423 8.26743   2 
   4   7   7 25.6650 6.40643   2 
  -5  -7  -7 -1.5102 11.5506   2 
  -5  -7  -7 12.4670 4.38922   1 
  -5  -7  -7 6.32858 4.42218   1 
  -5  -7  -7 6.59251 6.23407   2 
   5   7   7 9.54124 7.36250   2 
   5   7   7 12.4251 8.13147   2 
  -6  -7  -7 1.50063 8.01248   2 
  -6  -7  -7 1.97186 5.86878   1 
  -6  -7  -7 12.2824 15.9933   2 
   6   7   7 4.78707 9.47699   2 
   6   7   7 1.23713 9.92948   2 
   2  -8  -7 -10.515 4.31278   1 
   2  -8  -7 8.23092 6.88059   2 
   2  -8  -7 0.24043 10.0540   2 
  -2   8   7 5.92341 3.13291   1 
  -2   8   7 5.88176 5.64745   2 
  -2   8   7 -3.0064 5.53542   2 
   1  -8  -7 72.0115 7.05384   1 
   1  -8  -7 68.7950 8.19157   2 
   1  -8  -7 80.1670 9.17104   2 
  -1   8   7 80.9361 8.51907   2 
  -1   8   7 66.4610 6.52413   2 
  -1   8   7 68.0314 5.76051   1 
   0  -8  -7 -4.1215 3.19563   1 
   0  -8  -7 0.59342 6.62069   2 
   0   8   7 -4.5714 3.28491   1 
   0   8   7 -1.0154 5.26092   2 
   0   8   7 0.18593 4.29457   2 
  -1  -8  -7 41.4048 9.23160   2 
  -1  -8  -7 37.6084 4.47145   1 
  -1  -8  -7 47.7411 6.68231   2 
   1   8   7 29.3603 5.19009   2 
   1   8   7 45.3155 6.33826   2 
  -2  -8  -7 25.6644 3.04782   1 
  -2  -8  -7 35.1203 9.88555   2 
  -2  -8  -7 19.9802 5.64910   2 
   2   8   7 23.6890 6.21877   2 
   2   8   7 25.4067 5.50953   2 
  -3  -8  -7 33.7943 3.20598   1 
  -3  -8  -7 40.0575 4.80145   1 
  -3  -8  -7 32.4210 6.63169   2 
  -3  -8  -7 19.4534 11.1808   2 
   3   8   7 33.6151 8.80185   2 
   3   8   7 47.8262 6.95881   2 
  -4  -8  -7 24.2021 7.07109   2 
  -4  -8  -7 4.18759 12.9698   2 
  -4  -8  -7 10.5270 4.46166   1 
  -4  -8  -7 13.0867 2.81884   1 
   4   8   7 16.2923 7.89820   2 
   4   8   7 10.3402 6.84659   2 
  -5  -8  -7 36.8967 5.85486   1 
  -5  -8  -7 25.4946 8.43171   2 
  -5  -8  -7 29.1610 4.14013   1 
  -5  -8  -7 13.2381 16.3837   2 
   5   8   7 37.4760 10.5541   2 
   5   8   7 28.8775 8.72879   2 
   0  -9  -7 -2.5884 4.25927   1 
   0  -9  -7 -15.615 10.5261   2 
   0  -9  -7 5.84785 8.90034   2 
   0   9   7 -1.5851 8.25449   2 
   0   9   7 3.55473 6.75276   2 
  -1  -9  -7 16.9960 12.1595   2 
  -1  -9  -7 17.9598 8.21986   2 
  -1  -9  -7 13.6216 4.14153   1 
   1   9   7 35.1055 6.24871   2 
   1   9   7 34.0593 7.83558   2 
  -2  -9  -7 43.3511 8.11841   2 
  -2  -9  -7 19.5159 12.3641   2 
   2   9   7 30.8951 6.83783   2 
  -3  -9  -7 -22.342 14.0731   2 
  -3  -9  -7 0.78881 7.42083   2 
   3   9   7 17.3270 8.94406   2 
   3   9   7 10.0904 6.75298   2 
   3   6  -8 24.1909 6.67239   2 
   3   6  -8 15.1380 7.81076   2 
   2   6  -8 3.65642 6.46426   2 
   5   5  -8 152.937 18.3385   2 
   5   5  -8 141.753 15.0562   2 
  -5  -5   8 122.721 12.8690   2 
  -5  -5   8 142.194 10.0432   2 
   4   5  -8 12.7172 7.49570   2 
   4   5  -8 0.50233 7.50302   2 
  -4  -5   8 1.22082 5.94242   2 
  -4  -5   8 -1.2482 3.87903   2 
   3   5  -8 12.4176 5.40074   2 
   3   5  -8 12.0291 6.17880   2 
   2   5  -8 -0.7584 4.57830   2 
   2   5  -8 6.67422 5.56924   2 
   1   5  -8 -3.1514 4.27047   2 
  -1   5  -8 19.3897 2.36340   1 
  -2   5  -8 12.7465 3.26747   1 
  -3   5  -8 29.1586 4.40865   1 
   5   4  -8 329.192 11.3067   1 
   5   4  -8 332.378 15.7644   2 
   5   4  -8 328.419 19.6485   2 
  -5  -4   8 309.592 14.0771   2 
  -5  -4   8 324.849 9.22599   1 
  -5  -4   8 312.657 12.4313   2 
   4   4  -8 384.368 16.9022   2 
   4   4  -8 427.815 11.7321   1 
   4   4  -8 420.745 15.7651   2 
  -4  -4   8 406.951 14.1183   2 
  -4  -4   8 393.365 10.5983   1 
  -4  -4   8 430.335 12.5625   2 
   3   4  -8 747.575 20.3416   2 
   3   4  -8 696.120 20.9290   2 
  -3  -4   8 728.487 17.2877   2 
   2   4  -8 386.944 12.5988   2 
   2   4  -8 376.271 12.4297   2 
   0   4  -8 205.282 6.57878   1 
   0   4  -8 200.457 5.56387   1 
  -1   4  -8 18.9029 2.65945   1 
  -1   4  -8 24.4523 2.62404   1 
  -2   4  -8 49.7070 4.88138   1 
  -3   4  -8 22.2400 3.94453   1 
  -4   4  -8 -1.8602 3.67934   1 
  -5   4  -8 21.6581 6.07867   2 
  -5   4  -8 12.4396 5.30197   1 
  -5   4  -8 4.90171 6.20536   2 
   6   3  -8 26.6972 5.72100   1 
   6   3  -8 26.6368 8.55830   2 
   6   3  -8 19.4345 12.7611   2 
  -6  -3   8 23.9551 3.42802   1 
  -6  -3   8 25.1604 8.96817   2 
   5   3  -8 124.567 7.91699   1 
   5   3  -8 147.513 13.1222   2 
   5   3  -8 125.506 11.1085   2 
  -5  -3   8 147.343 10.5899   2 
  -5  -3   8 108.835 9.16153   2 
  -5  -3   8 129.141 5.29239   1 
   4   3  -8 48.1162 9.01111   2 
   4   3  -8 50.0867 6.80045   2 
   4   3  -8 46.3517 4.10803   1 
  -4  -3   8 46.6512 4.81030   2 
  -4  -3   8 51.9846 5.44229   2 
  -4  -3   8 47.4078 3.69962   1 
   3   3  -8 281.343 11.2165   2 
   3   3  -8 264.273 13.8828   2 
   3   3  -8 287.414 8.15605   1 
  -3  -3   8 290.898 7.95416   1 
  -3  -3   8 298.376 8.86270   2 
  -3  -3   8 285.736 9.63780   2 
   2   3  -8 274.796 9.84159   2 
   2   3  -8 275.963 7.24101   1 
   2   3  -8 272.130 10.6770   2 
   1   3  -8 783.410 17.1389   1 
   0   3  -8 321.017 8.15705   1 
   0   3  -8 333.841 9.23746   1 
  -1   3  -8 87.9715 4.49201   1 
  -1   3  -8 93.1285 4.65854   1 
  -2   3  -8 -0.7942 2.21234   1 
  -3   3  -8 66.5609 5.49428   1 
  -4   3  -8 3.02959 3.11254   1 
  -5   3  -8 45.3467 7.14109   2 
  -5   3  -8 37.3959 5.53806   2 
  -5   3  -8 32.1524 5.52885   1 
   6   2  -8 -1.1454 11.8167   2 
   6   2  -8 -0.2001 6.51804   2 
   6   2  -8 2.92415 4.88748   1 
  -6  -2   8 5.67914 2.56945   1 
  -6  -2   8 3.22611 7.51953   2 
  -6  -2   8 7.21294 8.37081   2 
   5   2  -8 16.6447 9.16870   2 
   5   2  -8 21.1382 4.02390   1 
   5   2  -8 16.0920 5.58095   2 
  -5  -2   8 18.8521 5.23705   2 
  -5  -2   8 30.7748 6.53001   2 
  -5  -2   8 19.9238 2.61554   1 
   4   2  -8 6.42428 4.50774   2 
   4   2  -8 6.89004 2.65557   1 
  -4  -2   8 9.95393 4.19635   2 
  -4  -2   8 7.06947 4.22553   2 
  -4  -2   8 8.96389 1.88116   1 
   3   2  -8 24.0081 4.31054   2 
   3   2  -8 32.7732 5.74319   2 
   3   2  -8 26.9879 3.37247   1 
  -3  -2   8 26.8398 2.89387   1 
  -3  -2   8 25.5196 3.36773   2 
   2   2  -8 3.38077 1.35762   1 
   2   2  -8 3.47548 3.76750   2 
   2   2  -8 4.10533 2.85986   2 
  -2  -2   8 2.74079 1.62910   1 
   1   2  -8 25.7159 1.93561   1 
   0   2  -8 161.394 4.83048   1 
  -1   2  -8 275.616 8.33665   1 
  -1   2  -8 270.736 7.82495   1 
  -2   2  -8 80.4704 4.64915   1 
  -3   2  -8 2.31031 2.41429   1 
  -4   2  -8 23.5061 4.59858   1 
  -5   2  -8 13.1658 7.09605   2 
  -5   2  -8 8.23307 3.76630   1 
  -6   2  -8 7.32707 4.93534   1 
  -6   2  -8 -2.1720 8.95660   2 
  -6   2  -8 6.97969 5.69601   2 
   6   1  -8 19.4024 5.27534   1 
   6   1  -8 34.2955 12.0688   2 
   6   1  -8 29.2416 6.36745   2 
  -6  -1   8 25.8321 3.20388   1 
  -6  -1   8 27.0516 7.67543   2 
  -6  -1   8 39.7259 8.12768   2 
   5   1  -8 1.21555 4.39191   2 
   5   1  -8 -0.2630 3.51829   1 
   5   1  -8 -10.431 10.6149   2 
  -5  -1   8 -2.1621 5.32900   2 
  -5  -1   8 3.85305 5.93797   2 
  -5  -1   8 7.26802 3.09934   1 
   4   1  -8 25.5313 7.13547   2 
   4   1  -8 21.5661 3.31853   1 
   4   1  -8 15.2742 3.87388   2 
  -4  -1   8 21.3278 2.20222   1 
  -4  -1   8 17.6530 4.37107   2 
  -4  -1   8 22.1641 4.26605   2 
   3   1  -8 67.2510 6.94707   2 
   3   1  -8 62.1322 3.81318   1 
   3   1  -8 51.5267 5.42633   2 
  -3  -1   8 66.2855 5.26321   2 
  -3  -1   8 61.5144 3.17128   1 
  -3  -1   8 66.4992 4.90920   2 
   2   1  -8 2.19177 2.33280   2 
   2   1  -8 2.42262 1.28608   1 
   2   1  -8 -2.2955 3.73594   2 
  -2  -1   8 -0.1122 1.27911   1 
  -2  -1   8 -0.0955 1.75706   2 
  -2  -1   8 2.35647 2.14855   2 
   1   1  -8 94.3699 3.25846   1 
  -1  -1   8 94.0861 4.07896   1 
   0   1  -8 0.67135 1.03198   1 
  -1   1  -8 12.0017 1.94791   1 
  -2   1  -8 -0.6641 1.59034   1 
  -3   1  -8 263.489 8.79405   1 
  -4   1  -8 8.60992 2.89529   1 
  -4   1  -8 -1.9112 5.02536   2 
  -5   1  -8 19.1779 3.99044   1 
  -5   1  -8 14.2746 4.12149   2 
  -5   1  -8 11.7809 7.63574   2 
  -6   1  -8 59.4652 6.25811   2 
  -6   1  -8 47.1713 10.0703   2 
  -6   1  -8 51.1148 5.75817   1 
   7   0  -8 -1.0995 7.31769   2 
   7   0  -8 1.80118 6.32822   1 
  -7   0   8 6.01840 9.68098   2 
   6   0  -8 25.6492 6.19060   2 
   6   0  -8 15.8513 12.2328   2 
   6   0  -8 26.8039 5.36821   1 
  -6   0   8 31.1233 7.87230   2 
  -6   0   8 23.7675 7.75663   2 
  -6   0   8 27.9871 3.42603   1 
   5   0  -8 18.2483 9.02236   2 
   5   0  -8 2.78305 3.33392   1 
   5   0  -8 12.5522 4.55682   2 
  -5   0   8 2.52589 5.03399   2 
  -5   0   8 2.55834 5.08644   2 
  -5   0   8 7.10805 2.04564   1 
   4   0  -8 22.1449 6.88765   2 
   4   0  -8 26.5536 3.97537   2 
   4   0  -8 26.6303 3.33363   1 
  -4   0   8 28.5908 2.80079   1 
  -4   0   8 31.6677 4.67103   2 
   3   0  -8 384.887 10.4273   1 
   3   0  -8 387.840 13.9175   2 
   3   0  -8 413.566 11.3330   2 
  -3   0   8 385.072 11.6677   2 
  -3   0   8 388.754 11.0719   2 
  -3   0   8 402.329 9.82151   1 
   2   0  -8 353.380 11.3205   2 
   2   0  -8 341.101 9.66334   2 
   2   0  -8 347.553 8.86180   1 
  -2   0   8 358.805 8.86276   1 
  -2   0   8 345.948 9.85754   2 
  -2   0   8 352.323 9.12476   2 
   1   0  -8 21.2648 2.09554   2 
   1   0  -8 25.3730 3.11587   2 
   1   0  -8 20.2835 1.74615   1 
  -1   0   8 22.8251 2.36869   1 
   0   0  -8 124.217 4.05222   1 
  -1   0  -8 12.3329 1.86170   1 
  -2   0  -8 73.8967 4.19037   1 
  -3   0  -8 29.7561 3.49179   1 
  -4   0  -8 9.86084 2.44223   1 
  -4   0  -8 12.4225 2.95020   2 
  -4   0  -8 14.5105 5.42481   2 
  -5   0  -8 34.1877 4.65659   2 
  -5   0  -8 41.1790 5.02488   1 
  -5   0  -8 35.8518 7.61777   2 
  -6   0  -8 9.67780 5.26565   2 
  -6   0  -8 5.34556 3.91798   1 
  -6   0  -8 14.1977 9.49205   2 
  -7   0  -8 -1.8071 7.28767   2 
  -7   0  -8 -18.049 11.8484   2 
  -7   0  -8 -9.5388 4.30005   1 
   7   0   8 6.28943 3.55999   2 
   7   0   8 8.30975 7.99789   2 
   6  -1  -8 2.18569 5.64176   2 
   6  -1  -8 7.32565 4.61800   1 
  -6   1   8 12.5787 7.56844   2 
  -6   1   8 10.7012 7.17878   2 
  -6   1   8 -1.5778 2.61569   1 
   5  -1  -8 17.7738 8.95227   2 
   5  -1  -8 19.6673 4.36484   2 
   5  -1  -8 16.8429 3.50592   1 
  -5   1   8 21.5626 2.49763   1 
  -5   1   8 21.8389 5.89585   2 
  -5   1   8 18.0383 5.42222   2 
   4  -1  -8 16.6084 2.95745   1 
   4  -1  -8 8.10740 6.66428   2 
   4  -1  -8 11.9669 3.37681   2 
  -4   1   8 17.0539 2.08741   1 
  -4   1   8 10.3885 4.15434   2 
  -4   1   8 15.3459 3.97118   2 
   3  -1  -8 1.12134 2.32850   2 
   3  -1  -8 -3.0665 4.70367   2 
   3  -1  -8 0.66214 1.45365   1 
  -3   1   8 -1.8544 2.42028   2 
  -3   1   8 -0.3790 1.00161   1 
   2  -1  -8 113.478 4.62342   2 
   2  -1  -8 110.403 4.04303   1 
   2  -1  -8 107.842 6.65510   2 
  -2   1   8 101.812 5.16849   2 
  -2   1   8 109.331 3.87052   1 
  -2   1   8 112.623 4.48205   2 
   1  -1  -8 80.6593 4.69411   2 
   1  -1  -8 83.2062 3.06082   1 
   1  -1  -8 76.1950 3.50227   2 
  -1   1   8 83.8239 3.93302   2 
  -1   1   8 81.3482 3.43771   1 
  -1   1   8 80.4541 3.07139   2 
   0  -1  -8 93.3667 3.34993   2 
   0  -1  -8 95.8788 3.40392   1 
  -1  -1  -8 1.59993 1.20979   1 
  -1  -1  -8 1.90230 1.45816   2 
  -3  -1  -8 324.141 9.86934   1 
  -3  -1  -8 312.213 8.87888   2 
  -3  -1  -8 318.592 10.7917   2 
  -4  -1  -8 342.114 10.1566   2 
  -4  -1  -8 337.971 10.6027   1 
  -4  -1  -8 322.087 12.7121   2 
  -5  -1  -8 64.7991 6.87110   2 
  -5  -1  -8 64.4907 8.48116   2 
  -5  -1  -8 63.0776 5.58777   1 
   5   1   8 56.9538 4.79917   2 
  -6  -1  -8 21.6072 5.78736   2 
  -6  -1  -8 0.74965 9.28603   2 
  -6  -1  -8 18.8058 3.94304   1 
   6   1   8 8.82315 5.71433   2 
   6   1   8 19.3211 3.56893   2 
  -7  -1  -8 -0.7920 7.69592   2 
  -7  -1  -8 -23.978 11.8370   2 
  -7  -1  -8 7.30272 4.75573   1 
   7   1   8 7.28062 4.14488   2 
   7   1   8 -14.499 7.66567   2 
   6  -2  -8 6.59413 4.52104   1 
   6  -2  -8 5.28398 5.02626   2 
   6  -2  -8 -13.689 11.6225   2 
  -6   2   8 7.26977 7.82209   2 
  -6   2   8 -1.4267 7.53532   2 
  -6   2   8 -3.2764 2.52546   1 
   5  -2  -8 0.04568 3.75043   2 
   5  -2  -8 -4.9117 2.91341   1 
   5  -2  -8 -13.979 8.71711   2 
  -5   2   8 13.3967 5.85440   2 
  -5   2   8 2.99057 1.88169   1 
  -5   2   8 -1.1139 5.21205   2 
   4  -2  -8 241.001 9.19292   1 
   4  -2  -8 240.694 13.8916   2 
   4  -2  -8 242.903 8.85839   2 
  -4   2   8 252.312 10.4120   2 
  -4   2   8 219.811 8.42617   1 
  -4   2   8 246.995 9.68953   2 
   3  -2  -8 5.80716 2.25466   2 
   3  -2  -8 2.82820 1.82613   1 
   3  -2  -8 2.55592 4.72908   2 
  -3   2   8 -0.9769 2.99926   2 
  -3   2   8 -1.0024 1.09452   1 
  -3   2   8 -0.7431 2.40211   2 
   2  -2  -8 24.2938 2.42742   2 
   2  -2  -8 21.6793 4.11339   2 
   2  -2  -8 25.3805 2.45375   1 
  -2   2   8 26.5071 2.02403   1 
  -2   2   8 23.7828 2.40502   2 
   1  -2  -8 6.10116 1.24042   1 
   1  -2  -8 6.18566 2.51061   2 
   1  -2  -8 2.74241 1.35360   2 
  -1   2   8 4.56189 1.75031   2 
  -1   2   8 4.90408 1.25018   1 
  -1   2   8 6.20189 1.40696   2 
   0  -2  -8 168.837 4.93739   1 
   0  -2  -8 171.410 5.45705   2 
   0  -2  -8 175.953 5.43545   2 
   0   2   8 176.561 5.03863   2 
   0   2   8 178.217 5.24670   2 
   0   2   8 176.951 5.68578   1 
  -1  -2  -8 8.94114 1.50668   2 
  -1  -2  -8 9.51437 1.60390   1 
  -1  -2  -8 8.89265 1.92061   2 
   1   2   8 9.19671 1.37535   2 
   1   2   8 8.71080 1.48997   2 
  -2  -2  -8 212.336 6.17249   2 
  -2  -2  -8 211.398 7.90204   2 
   2   2   8 215.435 5.78319   2 
   2   2   8 206.409 6.34815   2 
  -3  -2  -8 17.6809 2.56098   2 
  -3  -2  -8 19.7489 4.61019   2 
  -3  -2  -8 18.3094 2.62400   1 
   3   2   8 20.7722 2.34236   2 
   3   2   8 22.7031 2.55123   2 
  -4  -2  -8 2.29165 2.15906   1 
  -4  -2  -8 -5.3923 2.80803   2 
  -4  -2  -8 0.09747 5.49956   2 
   4   2   8 3.86506 2.31173   2 
  -5  -2  -8 286.677 14.8265   2 
  -5  -2  -8 291.261 10.1321   1 
   5   2   8 287.381 9.68352   2 
   5   2   8 289.425 10.6537   2 
  -6  -2  -8 9.46033 3.67330   1 
  -6  -2  -8 22.7382 6.01095   2 
  -6  -2  -8 11.0251 11.1778   2 
   6   2   8 14.6021 5.92191   2 
   6   2   8 11.6913 4.02289   2 
  -7  -2  -8 121.092 13.4673   2 
  -7  -2  -8 91.7570 8.71105   1 
  -7  -2  -8 83.7975 12.8622   2 
   7   2   8 69.2494 9.73208   2 
   7   2   8 82.8961 8.80189   2 
   6  -3  -8 9.65208 5.30143   2 
   6  -3  -8 4.92533 4.93713   1 
   6  -3  -8 17.5180 13.6216   2 
  -6   3   8 -2.9610 7.58524   2 
  -6   3   8 -1.6242 2.64177   1 
  -6   3   8 12.3645 8.35128   2 
   5  -3  -8 0.76863 3.76531   2 
   5  -3  -8 1.30894 9.77559   2 
   5  -3  -8 -7.0190 3.17657   1 
  -5   3   8 7.04501 5.79394   2 
  -5   3   8 -0.5219 1.90936   1 
  -5   3   8 -3.5041 5.74741   2 
   4  -3  -8 10.6483 3.16492   2 
   4  -3  -8 16.2595 7.73718   2 
   4  -3  -8 9.02925 2.91046   1 
  -4   3   8 13.6409 4.97742   2 
  -4   3   8 10.8117 4.05969   2 
  -4   3   8 14.7057 2.07418   1 
   3  -3  -8 -3.1643 1.88413   1 
   3  -3  -8 1.05372 5.50039   2 
   3  -3  -8 5.04009 2.25123   2 
  -3   3   8 3.35738 2.78051   2 
  -3   3   8 0.04266 3.06745   2 
  -3   3   8 0.33206 1.31993   1 
   2  -3  -8 129.366 7.73406   2 
   2  -3  -8 130.675 4.82433   1 
   2  -3  -8 130.436 5.22451   2 
  -2   3   8 128.911 5.40796   2 
  -2   3   8 131.972 4.34728   1 
  -2   3   8 122.595 6.03385   2 
   1  -3  -8 5.77675 1.78965   2 
   1  -3  -8 9.89161 2.87230   2 
   1  -3  -8 6.98662 1.30054   1 
  -1   3   8 7.15491 1.28117   1 
  -1   3   8 5.29849 1.52054   2 
  -1   3   8 2.19140 1.93483   2 
   0  -3  -8 -0.6226 0.85576   1 
   0  -3  -8 -0.4084 1.78090   2 
   0  -3  -8 -0.6702 1.72541   2 
   0   3   8 -0.6648 1.26663   1 
   0   3   8 0.71936 2.20045   2 
   0   3   8 -0.2068 1.39563   2 
  -1  -3  -8 48.8000 3.90925   2 
  -1  -3  -8 47.2357 3.30524   2 
  -1  -3  -8 46.4340 2.59204   1 
   1   3   8 54.6162 3.26722   2 
   1   3   8 49.2070 2.82491   2 
  -2  -3  -8 -0.4627 1.54440   1 
  -2  -3  -8 0.62163 1.75282   2 
  -2  -3  -8 -0.0529 3.49870   2 
   2   3   8 2.17172 1.46453   2 
   2   3   8 -4.0951 1.62950   2 
  -3  -3  -8 20.9822 2.95017   2 
  -3  -3  -8 22.9895 2.86011   1 
  -3  -3  -8 22.5583 4.60385   2 
   3   3   8 30.0211 3.21415   2 
   3   3   8 21.7004 2.83576   2 
  -4  -3  -8 35.4120 6.11872   2 
  -4  -3  -8 27.6428 3.81517   2 
  -4  -3  -8 38.1580 4.29222   1 
   4   3   8 33.2762 3.80541   2 
   4   3   8 30.1007 3.90617   2 
  -5  -3  -8 44.1315 5.22006   1 
  -5  -3  -8 37.0155 5.30055   2 
  -5  -3  -8 46.7251 8.49965   2 
   5   3   8 50.5166 5.09485   2 
  -6  -3  -8 13.2037 4.11161   1 
  -6  -3  -8 16.4798 9.37473   2 
  -6  -3  -8 2.37515 6.06637   2 
   6   3   8 9.26482 4.42369   2 
   6   3   8 2.47523 6.21762   2 
  -7  -3  -8 81.3882 14.1252   2 
  -7  -3  -8 96.4265 10.1999   2 
  -7  -3  -8 87.5799 9.37774   1 
   7   3   8 90.5861 9.97203   2 
   7   3   8 93.6291 8.35477   2 
   6  -4  -8 11.7446 5.80949   2 
   6  -4  -8 13.1336 16.1228   2 
   6  -4  -8 8.48081 5.43459   1 
  -6   4   8 8.26401 2.87627   1 
  -6   4   8 18.8471 8.94860   2 
  -6   4   8 4.13887 8.30722   2 
   5  -4  -8 2.11338 4.22998   1 
   5  -4  -8 4.73600 4.11401   2 
   5  -4  -8 0.47845 12.8431   2 
  -5   4   8 7.89914 6.16102   2 
  -5   4   8 -4.3332 6.60667   2 
  -5   4   8 6.12830 2.22076   1 
   4  -4  -8 4.11282 7.96076   2 
   4  -4  -8 3.62865 3.03354   1 
   4  -4  -8 6.08706 3.11378   2 
  -4   4   8 5.80058 4.30578   2 
  -4   4   8 4.29601 1.76567   1 
  -4   4   8 1.95227 4.73581   2 
   3  -4  -8 30.6443 3.43270   2 
   3  -4  -8 22.8267 7.01908   2 
   3  -4  -8 14.1761 4.49643   1 
  -3   4   8 29.0515 4.30968   2 
  -3   4   8 19.3015 2.55702   1 
  -3   4   8 21.5781 3.66430   2 
   2  -4  -8 17.5690 2.85722   2 
   2  -4  -8 14.9043 4.88461   2 
   2  -4  -8 17.9509 2.43545   1 
  -2   4   8 18.0097 2.21714   1 
  -2   4   8 19.0237 2.84835   2 
  -2   4   8 17.1324 3.31040   2 
   1  -4  -8 27.1063 2.49974   1 
   1  -4  -8 28.6669 3.76187   2 
   1  -4  -8 25.1065 2.89743   2 
  -1   4   8 23.7576 2.42237   1 
  -1   4   8 24.4341 2.94764   2 
  -1   4   8 31.5353 3.41870   2 
   0  -4  -8 62.2512 3.03605   1 
   0  -4  -8 72.5985 4.63634   2 
   0  -4  -8 71.4794 4.83713   2 
   0   4   8 70.7821 4.12343   2 
   0   4   8 66.1420 3.63427   1 
   0   4   8 69.5661 4.02094   2 
  -1  -4  -8 0.47355 1.31678   1 
  -1  -4  -8 0.36173 2.14650   2 
  -1  -4  -8 3.61000 2.75329   2 
   1   4   8 0.99628 1.89544   2 
   1   4   8 3.67373 1.92673   2 
  -2  -4  -8 17.1478 2.63972   2 
  -2  -4  -8 11.0145 3.74073   2 
  -2  -4  -8 16.7933 2.22704   1 
   2   4   8 15.0076 2.66215   2 
  -3  -4  -8 23.7273 2.89292   1 
  -3  -4  -8 23.3510 5.35632   2 
  -3  -4  -8 27.0339 3.25812   2 
  -3  -4  -8 25.2809 3.13171   1 
   3   4   8 20.2643 3.69594   2 
  -4  -4  -8 28.7219 6.82647   2 
  -4  -4  -8 18.1375 3.27871   1 
  -4  -4  -8 12.5196 3.69611   2 
   4   4   8 23.5435 4.22974   2 
  -5  -4  -8 28.7436 5.14021   2 
  -5  -4  -8 30.2020 8.80568   2 
  -5  -4  -8 41.4237 4.90344   1 
   5   4   8 44.4609 5.49969   2 
  -6  -4  -8 0.58865 4.04045   1 
  -6  -4  -8 7.42173 9.95217   2 
  -6  -4  -8 -11.729 5.62790   2 
   6   4   8 2.16568 5.92141   2 
  -7  -4  -8 -13.384 7.99490   2 
  -7  -4  -8 -16.537 14.3611   2 
  -7  -4  -8 -6.5765 5.37348   1 
   7   4   8 -5.4526 6.85950   2 
   5  -5  -8 184.975 9.95975   2 
   5  -5  -8 175.716 16.3980   2 
   5  -5  -8 177.074 10.4028   1 
  -5   5   8 175.735 13.7106   2 
  -5   5   8 204.382 11.7705   2 
  -5   5   8 180.025 7.34726   1 
   4  -5  -8 2.98249 9.06915   2 
   4  -5  -8 -4.7003 3.32600   2 
   4  -5  -8 1.12748 3.53449   1 
  -4   5   8 4.80241 4.54374   2 
  -4   5   8 -0.3240 5.08042   2 
  -4   5   8 4.34389 2.34299   1 
   3  -5  -8 121.611 6.68029   1 
   3  -5  -8 119.433 12.8613   2 
   3  -5  -8 130.870 6.77287   2 
  -3   5   8 133.911 8.42309   2 
  -3   5   8 117.884 7.52373   2 
  -3   5   8 129.070 5.10999   1 
   2  -5  -8 51.5643 4.40302   1 
   2  -5  -8 54.1373 6.65244   2 
   2  -5  -8 68.0537 5.44583   2 
  -2   5   8 60.1292 5.85570   2 
  -2   5   8 61.6694 3.51135   1 
  -2   5   8 65.1855 5.43514   2 
   1  -5  -8 47.6658 3.45752   1 
   1  -5  -8 42.7223 4.20189   2 
   1  -5  -8 45.3445 5.06794   2 
  -1   5   8 45.7663 4.21130   2 
  -1   5   8 41.4654 3.12882   1 
  -1   5   8 40.3440 4.84155   2 
   0  -5  -8 9.40015 1.81263   1 
   0  -5  -8 9.74111 3.03643   2 
   0  -5  -8 8.41053 3.38296   2 
   0   5   8 5.78303 2.54312   2 
   0   5   8 6.40050 2.44655   2 
   0   5   8 9.48176 2.09725   1 
  -1  -5  -8 5.52935 1.58837   1 
  -1  -5  -8 6.16416 2.93300   2 
  -1  -5  -8 7.10762 3.32831   2 
   1   5   8 10.6338 2.78651   2 
   1   5   8 5.22601 2.44946   2 
  -2  -5  -8 3.38372 1.69197   1 
  -2  -5  -8 4.73052 2.77544   2 
  -2  -5  -8 6.59324 4.53481   2 
   2   5   8 10.6116 3.00462   2 
   2   5   8 1.66097 2.43605   2 
  -3  -5  -8 70.1989 7.56145   2 
  -3  -5  -8 69.3125 5.88241   2 
  -3  -5  -8 68.7919 5.27226   1 
  -3  -5  -8 70.1618 4.71804   1 
   3   5   8 58.5038 5.25812   2 
   3   5   8 64.3943 5.72642   2 
  -4  -5  -8 127.272 13.0969   2 
  -4  -5  -8 109.163 7.81408   2 
  -4  -5  -8 108.366 6.53396   1 
   4   5   8 112.460 7.93237   2 
  -5  -5  -8 90.1894 7.54042   1 
  -5  -5  -8 94.7898 11.2191   2 
  -5  -5  -8 85.9834 9.14806   2 
   5   5   8 102.221 10.0958   2 
   5   5   8 86.4450 9.40932   2 
  -6  -5  -8 14.0170 11.8091   2 
  -6  -5  -8 3.63316 4.92246   1 
  -6  -5  -8 3.76530 6.66529   2 
   6   5   8 22.1582 7.09264   2 
  -7  -5  -8 -5.7778 8.50156   2 
  -7  -5  -8 9.47521 6.18248   1 
  -7  -5  -8 -0.2798 14.9752   2 
   7   5   8 14.9038 9.23290   2 
   4  -6  -8 73.2744 13.0930   2 
   4  -6  -8 61.3803 6.35942   1 
   4  -6  -8 63.2365 6.72877   2 
  -4   6   8 70.7737 7.99399   2 
  -4   6   8 75.4445 5.46487   1 
   3  -6  -8 312.128 11.5329   1 
   3  -6  -8 327.263 17.8304   2 
   3  -6  -8 321.512 11.9261   2 
  -3   6   8 331.046 13.1642   2 
  -3   6   8 340.540 12.1176   2 
  -3   6   8 343.094 9.67334   1 
   2  -6  -8 -3.0138 5.46450   1 
   2  -6  -8 -0.0592 6.53102   2 
   2  -6  -8 6.46556 3.81322   2 
  -2   6   8 5.96755 3.88187   2 
  -2   6   8 10.0950 3.48931   2 
   1  -6  -8 32.4889 5.64298   2 
   1  -6  -8 32.1720 4.51640   2 
   1  -6  -8 33.7744 4.04912   1 
  -1   6   8 37.4585 3.70241   1 
  -1   6   8 27.2025 4.13163   2 
  -1   6   8 23.5679 3.88589   2 
   0  -6  -8 43.0168 3.54329   1 
   0  -6  -8 38.2206 4.93867   2 
   0  -6  -8 38.2569 5.11486   2 
   0   6   8 38.3661 4.01633   2 
   0   6   8 30.4977 3.12537   1 
   0   6   8 35.2614 4.24782   2 
  -1  -6  -8 10.5679 3.79408   2 
  -1  -6  -8 0.09804 1.82654   1 
   1   6   8 8.90596 3.27640   2 
   1   6   8 7.27132 3.09183   2 
  -2  -6  -8 17.8212 6.12131   2 
  -2  -6  -8 7.23075 3.61532   2 
  -2  -6  -8 7.67049 1.96546   1 
   2   6   8 6.31539 3.29139   2 
   2   6   8 12.7750 3.94737   2 
  -3  -6  -8 84.4024 4.70389   1 
  -3  -6  -8 75.7260 8.58814   2 
  -3  -6  -8 89.7186 6.09920   1 
  -3  -6  -8 99.0333 7.19196   2 
   3   6   8 85.6550 7.39196   2 
   3   6   8 67.5965 7.62522   2 
  -4  -6  -8 20.7104 9.34395   2 
  -4  -6  -8 8.22134 3.46590   1 
  -4  -6  -8 4.89547 4.33730   2 
  -4  -6  -8 9.91671 3.67061   1 
   4   6   8 9.87270 5.15531   2 
   4   6   8 6.60402 5.77220   2 
  -5  -6  -8 -5.8161 10.3121   2 
  -5  -6  -8 -10.753 8.08155   2 
  -5  -6  -8 -0.7616 4.08419   1 
   5   6   8 2.45964 6.29206   2 
   5   6   8 11.5979 6.82295   2 
  -6  -6  -8 2.01568 7.16950   2 
  -6  -6  -8 19.4778 13.7146   2 
  -6  -6  -8 7.16929 5.53764   1 
   6   6   8 16.4681 8.33738   2 
   6   6   8 9.17117 8.11828   2 
   3  -7  -8 5.33690 5.30581   2 
   3  -7  -8 3.83791 4.68212   1 
   3  -7  -8 -1.8876 10.9854   2 
  -3   7   8 9.59688 2.97967   1 
  -3   7   8 10.7926 5.62250   2 
  -3   7   8 5.04352 6.11040   2 
   2  -7  -8 44.9409 5.88036   2 
   2  -7  -8 31.9596 8.46585   2 
   2  -7  -8 35.8702 4.74830   1 
  -2   7   8 41.6452 5.70001   2 
  -2   7   8 37.3600 5.37684   2 
  -2   7   8 49.8223 4.71837   1 
   1  -7  -8 184.771 7.71765   1 
   1  -7  -8 207.808 12.3826   2 
   1  -7  -8 202.754 10.7247   2 
  -1   7   8 199.935 9.40955   2 
  -1   7   8 197.290 7.29111   1 
  -1   7   8 197.476 9.52464   2 
   0  -7  -8 9.60205 5.21929   2 
   0  -7  -8 -1.3216 5.20700   2 
   0  -7  -8 11.9661 2.71956   1 
   0   7   8 10.0438 3.88555   2 
   0   7   8 8.51541 4.40968   2 
   0   7   8 7.67917 3.04304   1 
  -1  -7  -8 66.0514 4.17699   1 
  -1  -7  -8 52.1593 7.63508   2 
  -1  -7  -8 61.6661 6.10919   2 
   1   7   8 67.9983 6.67410   2 
   1   7   8 62.3969 7.34887   2 
  -2  -7  -8 54.8572 3.95749   1 
  -2  -7  -8 50.2917 5.44602   2 
  -2  -7  -8 37.5016 8.67361   2 
   2   7   8 47.3034 5.28662   2 
   2   7   8 54.3369 5.84735   2 
  -3  -7  -8 25.3958 3.95794   1 
  -3  -7  -8 19.6475 2.72831   1 
  -3  -7  -8 15.1683 8.57031   2 
  -3  -7  -8 19.7933 4.80102   2 
   3   7   8 20.8248 5.21749   2 
  -4  -7  -8 13.9432 3.10935   1 
  -4  -7  -8 9.83977 3.82052   1 
  -4  -7  -8 23.8475 11.4780   2 
  -4  -7  -8 11.7984 5.66626   2 
   4   7   8 5.86701 5.43371   2 
   4   7   8 -4.4362 6.26870   2 
  -5  -7  -8 -0.6450 8.32243   2 
  -5  -7  -8 6.81322 12.7821   2 
  -5  -7  -8 1.38927 4.63634   1 
  -5  -7  -8 3.57175 4.70525   1 
   5   7   8 1.27292 7.09146   2 
   5   7   8 12.0491 8.57464   2 
  -6  -7  -8 3.67764 6.03798   1 
  -6  -7  -8 0.36945 8.25476   2 
  -6  -7  -8 -0.1728 16.2506   2 
  -6  -7  -8 11.4352 6.45934   1 
   6   7   8 -10.491 9.83087   2 
   6   7   8 2.51733 9.36151   2 
   2  -8  -8 2.04832 6.62860   2 
   2  -8  -8 5.34607 4.87568   1 
   2  -8  -8 -6.0816 10.6230   2 
  -2   8   8 5.18224 6.03308   2 
  -2   8   8 -1.2296 8.35185   2 
  -2   8   8 11.6898 3.51777   1 
   1  -8  -8 13.3146 8.82150   2 
   1  -8  -8 6.83229 4.28801   1 
   1  -8  -8 9.46502 7.04603   2 
  -1   8   8 8.96150 5.18624   2 
  -1   8   8 5.19618 5.76806   2 
  -1   8   8 9.23948 3.64147   1 
   0  -8  -8 10.5017 7.61117   2 
   0  -8  -8 -5.5665 3.29976   1 
   0   8   8 -3.2897 5.38616   2 
   0   8   8 3.62332 4.85708   2 
  -1  -8  -8 65.2155 7.45447   2 
  -1  -8  -8 59.9870 10.2487   2 
  -1  -8  -8 77.8055 5.23058   1 
   1   8   8 86.3891 8.15913   2 
   1   8   8 93.6995 9.73410   2 
  -2  -8  -8 12.1106 5.84693   2 
  -2  -8  -8 20.5362 4.25504   1 
  -2  -8  -8 -13.127 9.14189   2 
   2   8   8 10.7023 5.06161   2 
  -3  -8  -8 18.9140 6.37106   2 
  -3  -8  -8 -1.5530 10.7935   2 
  -3  -8  -8 18.7641 2.98264   1 
  -3  -8  -8 15.1512 4.55084   1 
   3   8   8 24.2240 7.56808   2 
   3   8   8 25.8689 6.42847   2 
  -4  -8  -8 14.7437 14.0193   2 
  -4  -8  -8 26.1496 6.89417   2 
  -4  -8  -8 4.85964 4.74963   1 
  -4  -8  -8 5.20466 2.90820   1 
   4   8   8 11.8239 6.89494   2 
   4   8   8 10.5735 8.31632   2 
  -5  -8  -8 17.7702 6.74735   1 
  -5  -8  -8 21.8408 16.8265   2 
  -5  -8  -8 -4.9296 6.66721   1 
  -5  -8  -8 2.98047 8.01356   2 
   5   8   8 11.7210 10.5363   2 
   5   8   8 5.10967 8.46937   2 
   0  -9  -8 -0.6011 9.41590   2 
   0  -9  -8 1.98547 10.1376   2 
   0  -9  -8 -1.7939 4.74329   1 
   0   9   8 2.50123 6.03969   2 
   0   9   8 0.59824 6.96283   2 
  -1  -9  -8 3.98750 4.05726   1 
  -1  -9  -8 7.40158 8.55203   2 
  -1  -9  -8 5.22155 11.8945   2 
   1   9   8 8.07324 6.09735   2 
   1   9   8 21.4989 7.75894   2 
  -2  -9  -8 17.0114 7.98227   2 
  -2  -9  -8 21.9967 12.8656   2 
  -2  -9  -8 12.6435 3.85546   1 
   2   9   8 7.70448 6.37412   2 
   2   9   8 27.1799 8.04697   2 
  -3  -9  -8 6.52962 8.06190   2 
  -3  -9  -8 10.0456 3.46844   1 
  -3  -9  -8 -14.131 14.3092   2 
  -3  -9  -8 1.69613 4.96494   1 
   3   9   8 10.9104 8.96515   2 
   3   9   8 -1.4928 6.73313   2 
   2   6  -9 11.7197 7.31485   2 
   4   5  -9 25.3719 8.58508   2 
   4   5  -9 9.83515 8.09214   2 
   3   5  -9 2.68378 6.65016   2 
   3   5  -9 14.0118 6.01374   2 
   2   5  -9 85.7080 9.80462   2 
   2   5  -9 103.219 8.74750   2 
  -1   5  -9 5.33165 2.23528   1 
  -2   5  -9 6.72017 3.45608   1 
  -3   5  -9 -2.5846 4.09007   1 
   5   4  -9 -5.2025 9.84286   2 
   5   4  -9 3.05047 4.51786   1 
   5   4  -9 -8.2293 10.0302   2 
  -5  -4   9 8.63012 6.50440   2 
  -5  -4   9 -6.3983 2.96668   1 
  -5  -4   9 -4.4504 5.28233   2 
   4   4  -9 78.8681 8.51586   2 
   4   4  -9 58.5128 9.45185   2 
   4   4  -9 64.2390 6.19232   1 
  -4  -4   9 82.1751 6.73888   2 
  -4  -4   9 55.7213 5.11640   1 
  -4  -4   9 64.4961 6.30833   2 
   3   4  -9 204.869 11.8102   2 
   3   4  -9 211.026 7.27341   1 
   3   4  -9 216.261 11.2901   2 
   2   4  -9 26.3134 4.91501   2 
   2   4  -9 32.2608 5.24889   2 
   0   4  -9 100.609 4.93594   1 
   0   4  -9 95.8715 3.73455   1 
  -1   4  -9 14.5267 2.32278   1 
  -1   4  -9 15.3253 2.83315   1 
  -2   4  -9 39.4995 4.37740   1 
  -3   4  -9 -0.3235 4.00156   1 
  -4   4  -9 5.05910 4.24445   1 
   5   3  -9 -6.1481 10.6790   2 
   5   3  -9 -0.6236 4.06739   1 
   5   3  -9 9.95207 6.51913   2 
  -5  -3   9 0.67546 2.79071   1 
  -5  -3   9 -5.3490 5.17275   2 
  -5  -3   9 9.00275 5.92811   2 
   4   3  -9 8.83854 3.16306   1 
   4   3  -9 17.2375 7.99894   2 
   4   3  -9 10.6045 5.85727   2 
  -4  -3   9 5.03431 3.97015   2 
  -4  -3   9 10.4063 2.59847   1 
  -4  -3   9 5.53387 4.83634   2 
   3   3  -9 296.270 11.4921   2 
   3   3  -9 285.053 13.1432   2 
   3   3  -9 288.421 8.49592   1 
  -3  -3   9 283.104 9.30051   2 
  -3  -3   9 286.343 8.59080   1 
   2   3  -9 461.773 11.2833   1 
   2   3  -9 483.831 13.7423   2 
   2   3  -9 465.404 14.5471   2 
   1   3  -9 1102.43 23.8449   1 
   0   3  -9 449.843 12.0624   1 
   0   3  -9 453.845 10.8414   1 
  -1   3  -9 528.655 13.8585   1 
  -1   3  -9 525.510 13.0509   1 
  -2   3  -9 65.3334 5.25659   1 
  -3   3  -9 5.57366 3.36882   1 
  -4   3  -9 102.309 7.67850   1 
  -5   3  -9 10.3429 4.89298   1 
   6   2  -9 0.56130 7.23209   2 
   6   2  -9 4.14968 5.57309   1 
   6   2  -9 -2.0570 13.1968   2 
  -6  -2   9 -11.065 6.79129   2 
  -6  -2   9 9.11009 8.19172   2 
  -6  -2   9 5.31410 3.12642   1 
   5   2  -9 -0.8056 5.38694   2 
   5   2  -9 -1.0912 3.69094   1 
   5   2  -9 -14.661 9.13019   2 
  -5  -2   9 2.19057 2.32280   1 
  -5  -2   9 6.33103 5.54074   2 
  -5  -2   9 -4.3733 5.46528   2 
   4   2  -9 -4.5177 7.46446   2 
   4   2  -9 2.31075 2.95375   1 
   4   2  -9 0.91097 5.11846   2 
  -4  -2   9 7.52862 4.05620   2 
  -4  -2   9 1.76410 3.70363   2 
  -4  -2   9 5.36447 2.21588   1 
   3   2  -9 13.7520 4.20916   2 
   3   2  -9 16.1672 2.51981   1 
  -3  -2   9 15.8002 3.10518   2 
  -3  -2   9 8.12053 3.12796   2 
  -3  -2   9 16.1146 2.41950   1 
   2   2  -9 70.2692 5.89256   2 
   2   2  -9 65.3853 3.39987   1 
   2   2  -9 66.2016 7.56115   2 
  -2  -2   9 61.8784 4.05243   1 
   1   2  -9 320.511 7.98663   1 
   0   2  -9 138.548 4.54711   1 
  -1   2  -9 950.167 22.7642   1 
  -1   2  -9 967.249 21.9104   1 
  -2   2  -9 601.627 15.7354   1 
  -3   2  -9 124.500 6.51535   1 
  -4   2  -9 81.5943 6.68326   1 
  -5   2  -9 35.9689 5.22869   1 
  -6   2  -9 88.3593 11.0576   2 
  -6   2  -9 99.4576 9.77050   1 
  -6   2  -9 121.208 11.3370   2 
   6   1  -9 6.50609 5.40977   1 
   6   1  -9 -4.6497 12.2230   2 
   6   1  -9 3.36022 6.50049   2 
  -6  -1   9 4.24174 7.41007   2 
  -6  -1   9 1.38254 7.41261   2 
  -6  -1   9 11.6920 3.07454   1 
   5   1  -9 7.59963 4.96291   2 
   5   1  -9 2.06921 3.65807   1 
   5   1  -9 9.83317 9.81904   2 
  -5  -1   9 7.81257 2.40048   1 
  -5  -1   9 8.76754 4.90118   2 
  -5  -1   9 8.23430 5.41588   2 
   4   1  -9 16.7749 3.20133   1 
   4   1  -9 10.1335 8.64140   2 
   4   1  -9 17.6394 4.00181   2 
  -4  -1   9 19.1330 2.36220   1 
  -4  -1   9 17.8228 4.11805   2 
  -4  -1   9 15.8321 3.57692   2 
   3   1  -9 43.5347 3.65864   1 
   3   1  -9 46.2033 6.07592   2 
   3   1  -9 40.9175 4.44796   2 
  -3  -1   9 40.5743 3.24483   1 
  -3  -1   9 38.5612 4.04828   2 
  -3  -1   9 40.1227 4.15163   2 
   2   1  -9 18.1069 4.26683   2 
   2   1  -9 19.3440 2.04742   1 
   2   1  -9 18.7999 3.02976   2 
  -2  -1   9 19.4756 2.35526   1 
   1   1  -9 111.579 3.79624   1 
   0   1  -9 -1.0860 1.17482   1 
  -1   1  -9 37.3116 3.07341   1 
  -2   1  -9 42.9295 3.95817   1 
  -3   1  -9 381.364 11.6124   1 
  -4   1  -9 286.645 10.2694   1 
  -5   1  -9 120.473 7.85930   1 
  -5   1  -9 110.994 12.5004   2 
  -5   1  -9 110.079 8.28997   2 
  -6   1  -9 6.35005 5.97958   2 
  -6   1  -9 17.7338 4.79107   1 
  -6   1  -9 12.1835 9.66575   2 
   6   0  -9 9.48895 5.10136   1 
   6   0  -9 4.78844 5.92779   2 
   6   0  -9 -12.764 12.7681   2 
  -6   0   9 11.1728 7.66350   2 
  -6   0   9 6.60536 3.09966   1 
  -6   0   9 7.52494 7.26743   2 
   5   0  -9 17.1503 3.84766   1 
   5   0  -9 16.5226 4.84233   2 
   5   0  -9 24.5967 10.1183   2 
  -5   0   9 24.6633 2.83140   1 
  -5   0   9 22.7193 5.33093   2 
  -5   0   9 8.31848 5.56048   2 
   4   0  -9 83.5795 5.41356   1 
   4   0  -9 103.536 6.87112   2 
   4   0  -9 87.9137 9.27342   2 
  -4   0   9 86.6574 4.19452   1 
  -4   0   9 94.8622 6.86516   2 
  -4   0   9 79.7585 7.26344   2 
   3   0  -9 150.424 5.55251   1 
   3   0  -9 125.488 9.74753   2 
  -3   0   9 140.027 4.99726   1 
  -3   0   9 138.839 7.10246   2 
  -3   0   9 134.025 5.97883   2 
   2   0  -9 2.36564 2.22313   2 
   2   0  -9 1.91625 1.46259   1 
   2   0  -9 2.69393 3.94194   2 
  -2   0   9 4.74611 1.80051   1 
  -2   0   9 1.67240 2.46736   2 
  -2   0   9 -0.6383 1.65800   2 
   1   0  -9 0.59699 1.03504   1 
   1   0  -9 3.22448 1.75306   2 
   1   0  -9 -0.3128 2.83686   2 
  -1   0   9 0.10310 1.75908   1 
   0   0  -9 17.1479 1.91362   1 
  -1   0  -9 283.527 7.95949   1 
  -2   0  -9 114.995 5.36266   1 
  -3   0  -9 19.5281 2.93812   1 
  -4   0  -9 6.99979 3.86889   1 
  -5   0  -9 62.5292 6.99963   2 
  -5   0  -9 63.9455 6.15513   1 
  -5   0  -9 59.0620 9.18461   2 
  -6   0  -9 11.4813 9.98717   2 
  -6   0  -9 3.80731 5.18109   2 
  -6   0  -9 7.58090 4.17008   1 
   6  -1  -9 49.1504 6.21949   1 
   6  -1  -9 52.3333 6.91265   2 
   6  -1  -9 56.2310 13.9146   2 
  -6   1   9 37.3318 3.76798   1 
  -6   1   9 52.3908 8.51754   2 
  -6   1   9 49.2879 9.14224   2 
   5  -1  -9 10.0808 4.80647   2 
   5  -1  -9 13.1285 3.61785   1 
  -5   1   9 20.3891 6.06783   2 
  -5   1   9 18.1345 5.76542   2 
  -5   1   9 17.1509 2.39896   1 
   4  -1  -9 204.097 14.2213   2 
   4  -1  -9 212.466 8.00133   1 
   4  -1  -9 211.528 8.85515   2 
  -4   1   9 221.396 10.1509   2 
  -4   1   9 215.643 8.96799   2 
  -4   1   9 219.527 7.00748   1 
   3  -1  -9 9.53792 2.00270   1 
   3  -1  -9 9.28532 2.64433   2 
   3  -1  -9 5.98576 5.51526   2 
  -3   1   9 6.99358 3.23950   2 
  -3   1   9 7.23597 1.58986   1 
  -3   1   9 9.60715 2.76728   2 
   2  -1  -9 73.3609 4.29964   2 
   2  -1  -9 78.5583 3.64080   1 
   2  -1  -9 81.4564 6.60098   2 
  -2   1   9 78.4809 3.77824   2 
  -2   1   9 80.6215 3.50799   1 
  -2   1   9 73.8216 4.96715   2 
   1  -1  -9 1.35956 1.10851   1 
   1  -1  -9 2.66450 2.60309   2 
   1  -1  -9 2.71945 1.68165   2 
  -1   1   9 -0.4695 1.88434   2 
  -1   1   9 2.78581 1.36794   1 
  -1   1   9 2.57044 1.15014   2 
   0  -1  -9 197.408 5.54967   2 
   0  -1  -9 199.836 5.69016   1 
  -1  -1  -9 263.386 7.43363   1 
  -3  -1  -9 36.1825 4.82153   2 
  -3  -1  -9 29.8756 3.73401   1 
  -3  -1  -9 26.4912 2.72214   2 
  -4  -1  -9 27.1195 6.01619   2 
  -4  -1  -9 16.8237 2.89913   1 
  -4  -1  -9 25.9212 3.58992   2 
  -5  -1  -9 5.65673 4.01630   2 
  -5  -1  -9 -2.7126 7.15677   2 
  -5  -1  -9 9.51887 2.93182   1 
  -6  -1  -9 -3.3879 9.37388   2 
  -6  -1  -9 6.40761 3.99892   1 
  -6  -1  -9 18.8712 5.91268   2 
  -7  -1  -9 17.8382 8.18835   2 
  -7  -1  -9 -14.423 13.1937   2 
  -7  -1  -9 4.59638 4.94729   1 
   7   1   9 0.49942 7.46088   2 
   6  -2  -9 73.0377 8.30297   1 
   6  -2  -9 60.1056 7.19822   2 
   6  -2  -9 36.5356 13.2749   2 
  -6   2   9 63.1190 8.61462   2 
  -6   2   9 54.7411 9.45555   2 
  -6   2   9 61.5316 4.94445   1 
   5  -2  -9 304.897 10.8977   1 
   5  -2  -9 289.495 19.6013   2 
   5  -2  -9 298.939 11.4988   2 
  -5   2   9 300.322 8.73830   1 
  -5   2   9 292.722 12.5570   2 
  -5   2   9 290.876 14.0012   2 
   4  -2  -9 50.7975 5.77145   2 
   4  -2  -9 44.4041 8.25950   2 
   4  -2  -9 51.9393 4.74833   1 
  -4   2   9 46.0863 5.66848   2 
  -4   2   9 39.9709 6.06739   2 
  -4   2   9 44.7083 3.23823   1 
   3  -2  -9 24.1145 5.98192   2 
   3  -2  -9 26.5068 3.27588   2 
   3  -2  -9 27.2008 3.26780   1 
  -3   2   9 22.9048 2.36750   1 
  -3   2   9 20.2445 4.14889   2 
  -3   2   9 29.4522 3.59279   2 
   2  -2  -9 37.9641 3.48724   2 
   2  -2  -9 44.4584 2.94191   1 
   2  -2  -9 44.4215 5.05031   2 
  -2   2   9 42.2964 2.66869   1 
  -2   2   9 39.9156 3.31181   2 
  -2   2   9 24.5383 3.09069   2 
   1  -2  -9 57.8599 3.63177   2 
   1  -2  -9 53.0284 4.75559   2 
   1  -2  -9 57.5946 2.86278   1 
  -1   2   9 63.6445 3.04178   2 
  -1   2   9 61.7284 3.24253   1 
  -1   2   9 62.7460 3.96152   2 
   0  -2  -9 10.3859 1.85212   2 
   0  -2  -9 10.3840 2.02422   2 
   0  -2  -9 8.17149 1.36421   1 
   0   2   9 9.69945 1.55163   2 
   0   2   9 8.73737 1.80251   1 
   0   2   9 8.79009 1.81470   2 
  -1  -2  -9 12.6646 2.39446   2 
  -1  -2  -9 7.63626 1.57868   2 
  -1  -2  -9 10.8197 1.68851   1 
   1   2   9 13.0258 1.72175   2 
   1   2   9 10.4844 1.48247   2 
  -2  -2  -9 45.3079 3.70542   1 
  -2  -2  -9 43.9854 5.41853   2 
  -2  -2  -9 49.4044 3.20331   2 
   2   2   9 51.2354 2.57187   2 
  -3  -2  -9 331.873 9.31746   2 
  -3  -2  -9 334.157 12.1430   2 
  -3  -2  -9 345.382 10.4933   1 
  -4  -2  -9 16.9607 5.91183   2 
  -4  -2  -9 9.36042 3.20170   2 
  -4  -2  -9 16.7454 2.95049   1 
   4   2   9 14.7091 2.76916   2 
  -5  -2  -9 -0.1939 2.97542   1 
  -5  -2  -9 1.78737 4.05528   2 
  -5  -2  -9 -4.5262 7.71648   2 
   5   2   9 -6.3312 2.83631   2 
  -6  -2  -9 55.5660 6.54488   2 
  -6  -2  -9 24.5747 11.2261   2 
  -6  -2  -9 49.4664 5.23000   1 
   6   2   9 43.0252 4.70768   2 
  -7  -2  -9 6.97153 15.1586   2 
  -7  -2  -9 47.4104 8.93517   2 
  -7  -2  -9 22.4346 5.26613   1 
   7   2   9 25.7718 5.29645   2 
   7   2   9 6.70858 7.43392   2 
   6  -3  -9 1.75992 5.87688   2 
   6  -3  -9 4.79452 4.99311   1 
   6  -3  -9 20.3451 14.9368   2 
  -6   3   9 12.3799 8.16978   2 
  -6   3   9 -4.0616 9.25226   2 
  -6   3   9 -1.1211 2.70865   1 
   5  -3  -9 29.0441 5.06353   2 
   5  -3  -9 15.2689 4.27253   1 
   5  -3  -9 33.6684 11.2565   2 
  -5   3   9 25.9432 7.03284   2 
  -5   3   9 22.2223 5.89236   2 
  -5   3   9 29.6333 3.57321   1 
   4  -3  -9 11.5512 3.38292   2 
   4  -3  -9 18.4607 8.45141   2 
   4  -3  -9 17.0238 3.31680   1 
  -4   3   9 13.0111 4.96156   2 
  -4   3   9 15.5952 2.17230   1 
  -4   3   9 13.1813 5.90265   2 
   3  -3  -9 44.2181 4.41852   2 
   3  -3  -9 36.6406 7.06450   2 
   3  -3  -9 29.1061 4.89390   1 
  -3   3   9 36.1196 4.74057   2 
  -3   3   9 45.9272 5.07241   2 
  -3   3   9 32.5573 3.77674   1 
   2  -3  -9 37.7278 4.97377   2 
   2  -3  -9 41.2626 3.89723   2 
   2  -3  -9 39.0152 2.99879   1 
  -2   3   9 33.8251 3.70241   2 
  -2   3   9 33.7157 3.80779   2 
  -2   3   9 35.8638 2.68194   1 
   1  -3  -9 91.8365 5.96095   2 
   1  -3  -9 91.8409 4.41229   2 
   1  -3  -9 105.709 3.91254   1 
  -1   3   9 96.5289 4.00776   1 
  -1   3   9 101.682 4.15907   2 
   0  -3  -9 2.14694 1.08847   1 
   0  -3  -9 2.88345 1.79000   2 
   0  -3  -9 3.03734 2.12514   2 
   0   3   9 2.16041 1.71404   1 
   0   3   9 2.49500 1.63735   2 
   0   3   9 3.82030 1.56842   2 
  -1  -3  -9 -0.6525 1.20262   1 
  -1  -3  -9 0.38122 1.75981   2 
  -1  -3  -9 0.73481 2.38072   2 
   1   3   9 1.11675 1.59309   2 
   1   3   9 3.70052 1.78640   2 
  -2  -3  -9 66.6918 6.47165   2 
  -2  -3  -9 63.4809 3.75879   2 
  -2  -3  -9 59.8336 3.66188   1 
   2   3   9 62.3944 3.43522   2 
   2   3   9 51.8400 3.95109   2 
  -3  -3  -9 121.097 8.57655   2 
  -3  -3  -9 115.948 5.38721   2 
  -3  -3  -9 127.548 5.96048   1 
   3   3   9 124.213 5.75100   2 
   3   3   9 105.593 5.15420   2 
  -4  -3  -9 8.51224 3.20257   2 
  -4  -3  -9 5.39345 6.69433   2 
  -4  -3  -9 4.44835 3.00643   1 
   4   3   9 8.41956 3.25384   2 
   4   3   9 11.4319 3.02256   2 
  -5  -3  -9 81.6196 11.7646   2 
  -5  -3  -9 79.5097 6.30499   1 
  -5  -3  -9 61.5185 5.78185   2 
   5   3   9 70.8944 7.05727   2 
   5   3   9 72.4370 6.59598   2 
  -6  -3  -9 13.4046 10.0444   2 
  -6  -3  -9 5.62834 3.91411   1 
  -6  -3  -9 9.39060 5.85483   2 
   6   3   9 2.64059 4.62980   2 
  -7  -3  -9 50.0277 14.1208   2 
  -7  -3  -9 45.7535 6.71594   1 
  -7  -3  -9 38.2610 9.07347   2 
   7   3   9 52.7831 7.00290   2 
   5  -4  -9 -0.1330 3.88059   1 
   5  -4  -9 7.08586 4.40876   2 
   5  -4  -9 -2.1007 11.6942   2 
  -5   4   9 8.32177 2.25314   1 
  -5   4   9 15.5918 6.50378   2 
  -5   4   9 5.84891 7.01365   2 
   4  -4  -9 -2.7218 3.03775   1 
   4  -4  -9 -6.8272 8.10744   2 
   4  -4  -9 2.40008 3.38841   2 
  -4   4   9 -2.5559 4.30904   2 
  -4   4   9 7.63006 5.26366   2 
  -4   4   9 -2.0568 1.81161   1 
   3  -4  -9 18.6571 7.30558   2 
   3  -4  -9 23.5987 3.51817   2 
   3  -4  -9 18.9647 3.07952   1 
  -3   4   9 19.4656 3.77149   2 
  -3   4   9 19.8675 2.11072   1 
  -3   4   9 19.7088 4.44584   2 
   2  -4  -9 3.08693 1.78949   1 
   2  -4  -9 4.51448 2.49053   2 
   2  -4  -9 2.43129 4.72670   2 
  -2   4   9 3.49651 2.52752   2 
  -2   4   9 1.24922 2.85250   2 
  -2   4   9 4.32455 1.67357   1 
   1  -4  -9 59.2495 3.26261   1 
   1  -4  -9 53.8127 4.46485   2 
   1  -4  -9 56.3041 6.23467   2 
  -1   4   9 58.9267 3.34581   1 
  -1   4   9 46.7988 4.43532   2 
  -1   4   9 55.1043 3.89527   2 
   0  -4  -9 10.8919 1.60751   1 
   0  -4  -9 12.7925 3.08138   2 
   0  -4  -9 10.0876 2.73821   2 
   0   4   9 7.44352 1.98619   1 
   0   4   9 14.6993 2.51947   2 
   0   4   9 10.8627 2.23671   2 
  -1  -4  -9 0.20967 2.79162   2 
  -1  -4  -9 1.62394 2.34567   2 
  -1  -4  -9 1.86989 1.46061   1 
   1   4   9 2.85849 2.24702   2 
  -2  -4  -9 55.6086 5.45937   2 
  -2  -4  -9 58.8864 3.80987   1 
  -2  -4  -9 66.6242 4.50859   2 
   2   4   9 56.6188 4.63697   2 
  -3  -4  -9 36.3737 4.45568   1 
  -3  -4  -9 29.4587 3.51805   2 
  -3  -4  -9 38.3579 4.54291   1 
  -3  -4  -9 29.6910 5.67534   2 
   3   4   9 33.5021 4.07216   2 
   3   4   9 39.8117 3.68261   2 
  -4  -4  -9 8.91043 3.80787   2 
  -4  -4  -9 18.3200 3.21882   1 
  -4  -4  -9 17.2150 6.72339   2 
   4   4   9 14.5068 3.67450   2 
   4   4   9 15.1217 4.07673   2 
  -5  -4  -9 69.9514 8.38511   2 
  -5  -4  -9 75.0836 6.85310   1 
  -5  -4  -9 67.7637 9.45102   2 
   5   4   9 76.0554 8.00751   2 
   5   4   9 66.6999 7.81771   2 
  -6  -4  -9 2.91321 6.30303   2 
  -6  -4  -9 4.95489 4.12189   1 
  -6  -4  -9 3.22268 10.0577   2 
   6   4   9 4.35789 5.45179   2 
  -7  -4  -9 -14.229 8.05192   2 
  -7  -4  -9 -12.511 14.9677   2 
  -7  -4  -9 9.24099 6.03974   1 
   7   4   9 3.36089 6.98568   2 
   5  -5  -9 -3.3901 5.34468   1 
   5  -5  -9 -10.983 13.4665   2 
  -5   5   9 11.0625 3.28688   1 
  -5   5   9 4.26162 6.62916   2 
  -5   5   9 1.96054 7.65074   2 
   4  -5  -9 5.79764 4.03764   2 
   4  -5  -9 13.1717 10.0548   2 
   4  -5  -9 10.5346 4.33200   1 
  -4   5   9 6.95499 6.09954   2 
  -4   5   9 2.63969 4.94816   2 
  -4   5   9 6.04248 2.61738   1 
   3  -5  -9 2.14338 7.95160   2 
   3  -5  -9 5.21971 3.28675   1 
   3  -5  -9 11.6354 3.61092   2 
  -3   5   9 3.74388 3.97587   2 
  -3   5   9 12.5590 2.16871   1 
  -3   5   9 4.72889 4.36623   2 
   2  -5  -9 19.1583 3.57071   2 
   2  -5  -9 14.8800 5.81371   2 
   2  -5  -9 20.9348 5.03167   1 
  -2   5   9 18.1259 4.07799   2 
  -2   5   9 19.0780 3.30495   2 
   1  -5  -9 35.1044 3.50071   1 
   1  -5  -9 34.4957 5.00481   2 
   1  -5  -9 33.3861 4.16363   2 
  -1   5   9 39.1928 3.61711   2 
  -1   5   9 34.1043 3.85463   2 
  -1   5   9 33.8143 3.39241   1 
   0  -5  -9 38.0950 4.17977   2 
   0  -5  -9 32.8472 4.19240   2 
   0  -5  -9 33.3621 2.95505   1 
   0   5   9 31.3369 3.40352   2 
   0   5   9 29.0250 3.44433   2 
   0   5   9 32.1116 3.89537   1 
  -1  -5  -9 51.1945 3.37842   1 
  -1  -5  -9 57.2792 5.13257   2 
  -1  -5  -9 63.6553 6.52622   2 
   1   5   9 48.1763 4.43904   2 
   1   5   9 58.4599 5.21702   2 
  -2  -5  -9 -3.3096 4.69043   2 
  -2  -5  -9 -1.4392 1.76269   1 
  -2  -5  -9 3.14009 2.92868   2 
   2   5   9 7.04573 2.97548   2 
   2   5   9 -0.7737 2.35087   2 
  -3  -5  -9 -0.2177 2.43117   1 
  -3  -5  -9 -1.0002 2.61851   1 
  -3  -5  -9 0.16634 3.27669   2 
  -3  -5  -9 -6.1245 5.90498   2 
   3   5   9 4.09526 3.22472   2 
   3   5   9 -6.5428 3.30240   2 
  -4  -5  -9 59.9585 9.48507   2 
  -4  -5  -9 51.1817 6.12698   1 
  -4  -5  -9 46.6031 5.10626   2 
  -4  -5  -9 51.0941 5.93665   1 
   4   5   9 42.1347 5.22523   2 
   4   5   9 52.7717 6.07463   2 
  -5  -5  -9 1.44278 3.86050   1 
  -5  -5  -9 -16.334 8.68213   2 
  -5  -5  -9 -7.2325 4.79283   2 
   5   5   9 -1.3256 5.31562   2 
   5   5   9 4.35427 6.25571   2 
  -6  -5  -9 -7.5786 6.56411   2 
  -6  -5  -9 10.9405 12.2929   2 
  -6  -5  -9 5.57605 4.80862   1 
   6   5   9 1.23545 6.96657   2 
   4  -6  -9 1.10148 5.12887   1 
   4  -6  -9 -7.5116 12.1584   2 
   4  -6  -9 6.41758 5.94350   2 
  -4   6   9 1.47441 3.20009   1 
  -4   6   9 -5.1280 5.58630   2 
  -4   6   9 4.18041 6.71835   2 
   3  -6  -9 32.4831 4.93775   1 
   3  -6  -9 28.9618 9.90680   2 
   3  -6  -9 32.7478 5.39156   2 
  -3   6   9 35.5185 4.21829   1 
  -3   6   9 31.5493 6.03320   2 
  -3   6   9 31.4212 6.40898   2 
   2  -6  -9 32.9032 4.74885   2 
   2  -6  -9 33.8778 7.56807   2 
   2  -6  -9 23.2863 3.65093   1 
  -2   6   9 33.6769 5.12884   2 
  -2   6   9 34.0980 4.37307   2 
   1  -6  -9 130.896 5.82252   1 
   1  -6  -9 137.175 9.98255   2 
   1  -6  -9 126.660 7.92112   2 
  -1   6   9 119.944 7.01446   2 
  -1   6   9 119.196 5.46769   1 
  -1   6   9 117.618 7.31285   2 
   0  -6  -9 11.9173 4.22542   2 
   0  -6  -9 8.97896 2.27828   1 
   0  -6  -9 1.12692 4.25160   2 
   0   6   9 7.29659 3.21088   2 
   0   6   9 4.23150 2.98690   1 
   0   6   9 4.14613 3.45113   2 
  -1  -6  -9 253.001 7.47479   1 
  -1  -6  -9 265.224 9.88921   2 
   1   6   9 263.764 9.27416   2 
   1   6   9 267.521 9.79900   2 
  -2  -6  -9 -0.1265 3.69688   2 
  -2  -6  -9 4.99349 5.91359   2 
  -2  -6  -9 0.79428 1.89593   1 
   2   6   9 2.68494 3.14539   2 
   2   6   9 1.73802 3.56073   2 
  -3  -6  -9 42.8132 5.12944   2 
  -3  -6  -9 29.0791 3.29384   1 
  -3  -6  -9 41.3997 4.40674   1 
  -3  -6  -9 21.9701 7.90902   2 
   3   6   9 25.8566 5.08832   2 
   3   6   9 43.5736 4.88313   2 
  -4  -6  -9 11.5625 3.51970   1 
  -4  -6  -9 19.7559 5.28408   2 
  -4  -6  -9 32.4162 9.58993   2 
  -4  -6  -9 23.4587 4.54494   1 
   4   6   9 11.8317 4.92710   2 
   4   6   9 12.4036 6.10537   2 
  -5  -6  -9 4.11639 4.75483   1 
  -5  -6  -9 -0.5264 5.19056   2 
  -5  -6  -9 0.61726 4.25214   1 
  -5  -6  -9 11.0480 10.9063   2 
   5   6   9 12.3571 6.97609   2 
   5   6   9 -0.0339 6.14242   2 
  -6  -6  -9 19.0354 5.64028   1 
  -6  -6  -9 -1.8953 7.01000   2 
  -6  -6  -9 0.07126 14.5892   2 
   6   6   9 0.95216 8.42239   2 
   6   6   9 4.19450 8.12666   2 
   3  -7  -9 10.7138 11.6822   2 
   3  -7  -9 7.60730 5.23986   1 
   3  -7  -9 -0.4336 5.86531   2 
  -3   7   9 13.6555 5.52935   2 
  -3   7   9 14.2384 3.52838   1 
  -3   7   9 13.4184 6.73249   2 
   2  -7  -9 4.34781 5.13486   2 
   2  -7  -9 -7.6249 8.49759   2 
   2  -7  -9 -0.6121 3.78085   1 
  -2   7   9 4.58115 3.01896   1 
  -2   7   9 -0.9798 4.57058   2 
  -2   7   9 -0.3216 5.04999   2 
   1  -7  -9 42.6498 6.35926   2 
   1  -7  -9 30.7848 4.05163   1 
   1  -7  -9 32.3458 7.48261   2 
  -1   7   9 34.0390 3.92790   1 
  -1   7   9 43.0943 5.75001   2 
  -1   7   9 33.4964 5.10822   2 
   0  -7  -9 29.1807 6.40305   2 
   0  -7  -9 29.4351 3.41916   1 
   0  -7  -9 20.5076 6.26848   2 
   0   7   9 25.8182 4.49013   2 
   0   7   9 25.8929 4.00635   1 
   0   7   9 23.9011 4.90917   2 
  -1  -7  -9 69.4266 8.54052   2 
  -1  -7  -9 83.4224 4.89916   1 
   1   7   9 79.6642 8.16250   2 
   1   7   9 84.8061 7.25936   2 
  -2  -7  -9 2.86377 2.24324   1 
  -2  -7  -9 -0.2024 4.57682   2 
  -2  -7  -9 9.31532 7.83336   2 
   2   7   9 3.90846 4.23570   2 
   2   7   9 0.29569 4.58134   2 
  -3  -7  -9 76.1976 10.1685   2 
  -3  -7  -9 102.987 6.97574   1 
  -3  -7  -9 88.8387 4.97501   1 
  -3  -7  -9 99.5707 8.98006   2 
   3   7   9 75.7154 7.66254   2 
   3   7   9 110.191 8.49484   2 
  -4  -7  -9 41.6147 6.86752   1 
  -4  -7  -9 27.8790 9.31319   1 
  -4  -7  -9 40.6983 7.82183   2 
  -4  -7  -9 43.8595 11.8409   2 
   4   7   9 26.0503 7.82540   2 
   4   7   9 36.5984 6.58560   2 
  -5  -7  -9 2.45094 6.52345   2 
  -5  -7  -9 2.34550 4.74613   1 
  -5  -7  -9 -6.6466 13.4087   2 
  -5  -7  -9 4.62262 4.30675   1 
   5   7   9 -1.6623 7.31192   2 
   5   7   9 5.49434 8.53452   2 
   2  -8  -9 10.1799 7.17901   2 
   2  -8  -9 6.22152 5.50780   1 
   2  -8  -9 10.1421 11.5930   2 
  -2   8   9 4.76082 6.43540   2 
  -2   8   9 11.6426 4.03207   1 
  -2   8   9 13.5215 6.23273   2 
   1  -8  -9 22.0251 9.30641   2 
   1  -8  -9 1.09295 7.12169   2 
   1  -8  -9 -2.1691 4.14518   1 
  -1   8   9 4.71523 6.00109   2 
  -1   8   9 6.28544 4.07326   1 
  -1   8   9 7.56499 5.50410   2 
   0  -8  -9 4.39017 4.27065   1 
   0  -8  -9 6.80626 7.60724   2 
   0   8   9 2.06277 4.79862   2 
   0   8   9 2.25110 5.74514   2 
  -1  -8  -9 95.7719 9.72611   2 
  -1  -8  -9 73.0331 10.7556   2 
  -1  -8  -9 97.3903 5.81308   1 
   1   8   9 73.5635 8.47620   2 
   1   8   9 103.788 10.7567   2 
  -2  -8  -9 4.90269 6.26909   2 
  -2  -8  -9 1.44111 2.94559   1 
   2   8   9 -3.4177 4.98776   2 
   2   8   9 2.44574 5.70029   2 
  -3  -8  -9 99.3259 13.4287   2 
  -3  -8  -9 129.586 5.98589   1 
  -3  -8  -9 131.330 9.12627   1 
  -3  -8  -9 114.779 10.9797   2 
   3   8   9 132.109 12.5817   2 
   3   8   9 124.464 10.6006   2 
  -4  -8  -9 0.00996 6.31960   1 
  -4  -8  -9 19.1972 9.18690   1 
  -4  -8  -9 6.90247 7.20684   2 
  -4  -8  -9 30.3868 14.4170   2 
   4   8   9 17.5162 6.87688   2 
   4   8   9 13.3329 8.56176   2 
  -1  -9  -9 12.4409 7.09655   1 
  -1  -9  -9 1.86491 8.77040   2 
  -1  -9  -9 17.7610 12.2694   2 
   1   9   9 6.22013 6.11741   2 
   1   9   9 11.3451 7.74165   2 
  -2  -9  -9 3.95685 3.97767   1 
  -2  -9  -9 -7.2952 8.17888   2 
  -2  -9  -9 13.3244 14.0230   2 
   2   9   9 15.1352 8.34815   2 
   2   9   9 -2.9552 6.37977   2 
   3   5 -10 16.3096 7.95101   2 
   3   5 -10 26.0428 6.83016   2 
  -1   5 -10 5.67671 2.15941   1 
  -1   5 -10 5.72318 3.45927   1 
  -2   5 -10 5.27854 4.13892   1 
  -2   5 -10 5.33757 3.26217   1 
   4   4 -10 32.7004 7.84349   2 
   4   4 -10 31.4881 8.70735   2 
   4   4 -10 28.1551 4.43075   1 
   3   4 -10 41.2761 3.94837   1 
   3   4 -10 45.5899 7.34964   2 
   3   4 -10 42.7079 7.24308   2 
   2   4 -10 71.9408 7.92388   2 
   2   4 -10 55.0316 4.03754   1 
   1   4 -10 76.1785 4.95713   1 
   0   4 -10 14.8947 2.91670   1 
   0   4 -10 11.0903 1.75380   1 
  -1   4 -10 -2.6915 2.65126   1 
  -1   4 -10 4.25954 2.25563   1 
  -2   4 -10 52.1723 6.09620   1 
  -2   4 -10 51.1831 5.62299   1 
  -3   4 -10 0.93667 3.98493   1 
   5   3 -10 8.92533 4.83263   1 
   5   3 -10 15.4664 13.0759   2 
   5   3 -10 10.2558 11.2097   2 
  -5  -3  10 8.20352 3.19397   1 
  -5  -3  10 15.6273 5.98559   2 
  -5  -3  10 9.59963 5.82657   2 
   4   3 -10 41.8789 4.50363   1 
   4   3 -10 35.3833 6.96228   2 
   4   3 -10 51.5018 9.19245   2 
  -4  -3  10 43.2403 4.06602   1 
  -4  -3  10 41.6614 4.89746   2 
   3   3 -10 78.2332 5.02111   1 
   3   3 -10 83.6068 8.41798   2 
   3   3 -10 87.1007 8.75745   2 
   2   3 -10 3.02465 1.81082   1 
   2   3 -10 -3.0123 4.59023   2 
   1   3 -10 45.5383 3.06744   1 
   0   3 -10 168.525 6.83769   1 
   0   3 -10 174.889 5.42754   1 
  -1   3 -10 134.245 6.48325   1 
  -1   3 -10 141.499 5.58876   1 
  -2   3 -10 6.62299 3.01830   1 
  -3   3 -10 19.0901 4.06022   1 
  -4   3 -10 15.5813 4.79918   1 
   5   2 -10 -6.3278 5.43980   2 
   5   2 -10 2.64489 10.8296   2 
   5   2 -10 -5.2366 4.04772   1 
  -5  -2  10 -12.766 5.52509   2 
  -5  -2  10 1.33502 5.08257   2 
  -5  -2  10 1.37020 2.80206   1 
   4   2 -10 32.7528 4.17268   1 
   4   2 -10 31.1567 8.33884   2 
   4   2 -10 29.5934 5.70854   2 
  -4  -2  10 31.4429 5.05505   2 
  -4  -2  10 30.8399 3.22926   1 
  -4  -2  10 35.0645 4.91695   2 
   3   2 -10 -0.6794 4.16632   2 
   3   2 -10 1.23441 5.69216   2 
   3   2 -10 -0.0233 2.05086   1 
  -3  -2  10 3.03806 2.33524   1 
   2   2 -10 28.3036 5.59965   2 
   2   2 -10 29.8102 3.13635   1 
   2   2 -10 24.5072 4.00480   2 
   1   2 -10 28.1085 2.49928   1 
   0   2 -10 15.2918 1.99854   1 
  -1   2 -10 96.0278 4.65725   1 
  -1   2 -10 91.9075 5.44229   1 
  -2   2 -10 337.049 10.7384   1 
  -3   2 -10 852.974 26.9898   1 
  -4   2 -10 97.9638 7.47690   1 
  -5   2 -10 124.889 9.31222   1 
   6   1 -10 13.7096 7.21646   2 
   6   1 -10 6.02057 5.80296   1 
   6   1 -10 -7.1413 13.8906   2 
  -6  -1  10 9.73643 7.50143   2 
  -6  -1  10 6.58980 13.5731   2 
  -6  -1  10 2.79073 3.31228   1 
   5   1 -10 9.94586 3.92966   1 
   5   1 -10 28.0910 11.0757   2 
   5   1 -10 13.7689 5.27584   2 
  -5  -1  10 14.4406 5.55678   2 
  -5  -1  10 15.0279 2.70096   1 
  -5  -1  10 7.51153 5.14759   2 
   4   1 -10 31.2273 6.47172   1 
   4   1 -10 43.2000 9.37493   2 
  -4  -1  10 38.9996 3.88526   1 
  -4  -1  10 33.6400 5.05103   2 
  -4  -1  10 39.3926 4.36481   2 
   3   1 -10 58.8071 6.30061   2 
   3   1 -10 66.1389 7.39115   2 
   3   1 -10 71.7959 4.47788   1 
  -3  -1  10 57.8004 5.87464   2 
  -3  -1  10 62.9273 4.31709   1 
  -3  -1  10 58.4224 4.73739   2 
   2   1 -10 -4.4294 4.43586   2 
   2   1 -10 -0.8735 2.81947   2 
   2   1 -10 3.14388 1.55658   1 
  -2  -1  10 -0.9608 1.86542   1 
   1   1 -10 -1.0599 1.16918   1 
   0   1 -10 222.947 6.40879   1 
  -1   1 -10 46.8922 3.58225   1 
  -2   1 -10 13.8623 2.80383   1 
  -3   1 -10 53.5969 5.22834   1 
  -4   1 -10 296.642 10.9967   1 
  -5   1 -10 526.655 16.4912   1 
  -6   1 -10 279.438 18.5215   2 
  -6   1 -10 272.712 13.2417   2 
  -6   1 -10 286.352 13.3156   1 
   6   0 -10 8.86515 14.0909   2 
   6   0 -10 23.8500 6.09324   1 
   6   0 -10 23.3821 7.00148   2 
  -6   0  10 17.5649 3.65621   1 
  -6   0  10 39.3639 8.77439   2 
  -6   0  10 17.8793 7.84580   2 
   5   0 -10 0.21716 4.09213   1 
   5   0 -10 -0.6526 4.84708   2 
   5   0 -10 -0.6809 10.0344   2 
  -5   0  10 -1.0164 6.30286   2 
  -5   0  10 0.00479 2.43133   1 
  -5   0  10 -5.2736 5.22921   2 
   4   0 -10 -4.2816 3.55131   2 
   4   0 -10 -7.2577 7.15555   2 
   4   0 -10 -0.6758 2.57669   1 
  -4   0  10 1.07309 3.74471   2 
  -4   0  10 4.86156 4.45132   2 
  -4   0  10 2.24648 2.04700   1 
   3   0 -10 6.67256 3.34908   2 
   3   0 -10 9.30356 2.29353   1 
   3   0 -10 11.4995 5.92139   2 
  -3   0  10 5.57798 3.64527   2 
  -3   0  10 6.22779 2.74823   2 
  -3   0  10 7.25224 2.13874   1 
   2   0 -10 124.151 5.78506   2 
   2   0 -10 123.348 4.68570   1 
   2   0 -10 129.692 8.36256   2 
  -2   0  10 125.085 6.04780   2 
  -2   0  10 134.174 5.23891   1 
   1   0 -10 -0.8755 1.73574   2 
   1   0 -10 -2.0921 1.13996   1 
  -1   0  10 -1.5653 1.93446   1 
   0   0 -10 58.4251 3.10936   1 
  -1   0 -10 24.5085 2.45213   1 
  -2   0 -10 2.05289 2.05928   1 
  -2   0 -10 0.68402 2.02780   1 
  -3   0 -10 0.64291 2.55197   1 
  -4   0 -10 23.3398 3.58254   1 
  -5   0 -10 111.372 8.01528   2 
  -5   0 -10 92.1109 7.27653   1 
  -6   0 -10 149.290 9.49951   1 
  -6   0 -10 152.106 11.2803   2 
  -6   0 -10 161.079 16.9310   2 
   6  -1 -10 3.12437 13.9544   2 
   6  -1 -10 9.05692 4.92739   1 
   6  -1 -10 20.9681 6.30946   2 
  -6   1  10 17.9926 3.61633   1 
  -6   1  10 -0.3007 7.59640   2 
  -6   1  10 11.1168 8.70296   2 
   5  -1 -10 18.1330 4.53219   1 
   5  -1 -10 30.9404 5.32546   2 
   5  -1 -10 5.71748 9.61687   2 
  -5   1  10 23.8117 6.89759   2 
  -5   1  10 27.0206 3.01820   1 
  -5   1  10 18.8253 6.00794   2 
   4  -1 -10 81.4591 6.65940   2 
   4  -1 -10 69.2266 5.42769   1 
  -4   1  10 79.5422 4.16861   1 
  -4   1  10 72.2847 6.64030   2 
   3  -1 -10 3.54836 1.96683   1 
   3  -1 -10 1.00530 5.66074   2 
   3  -1 -10 6.85918 2.84664   2 
  -3   1  10 4.51840 3.44350   2 
  -3   1  10 2.27576 2.57877   2 
  -3   1  10 4.99050 1.69073   1 
   2  -1 -10 15.6850 1.93692   1 
   2  -1 -10 19.9235 4.29713   2 
   2  -1 -10 14.6986 2.74873   2 
  -2   1  10 15.7300 2.11662   1 
  -2   1  10 19.0364 3.24990   2 
  -2   1  10 14.0494 2.07358   2 
   1  -1 -10 23.9446 3.55038   2 
   1  -1 -10 22.3020 2.36166   2 
   1  -1 -10 19.6585 2.25579   1 
  -1   1  10 26.2883 2.12809   2 
  -1   1  10 25.3541 2.83421   1 
   0  -1 -10 154.417 4.99347   1 
   0  -1 -10 154.019 4.94775   2 
  -1  -1 -10 6.43250 1.80929   1 
  -2  -1 -10 2.26292 2.05580   1 
  -3  -1 -10 103.223 5.78991   1 
  -4  -1 -10 50.3454 4.86536   1 
  -4  -1 -10 51.5406 7.06802   2 
  -4  -1 -10 44.8465 4.08812   2 
  -5  -1 -10 7.86035 8.17339   2 
  -5  -1 -10 11.1148 3.34246   1 
  -5  -1 -10 21.5105 4.65672   2 
  -6  -1 -10 22.0827 5.69443   2 
  -6  -1 -10 -3.1110 3.68291   1 
  -6  -1 -10 -24.240 9.76620   2 
   6  -2 -10 198.132 12.3783   2 
   6  -2 -10 205.108 18.3829   2 
   6  -2 -10 188.008 11.1325   1 
  -6   2  10 194.174 16.7854   2 
  -6   2  10 225.798 8.09938   1 
  -6   2  10 195.512 14.3862   2 
   5  -2 -10 597.723 17.5557   2 
   5  -2 -10 602.546 25.1640   2 
   5  -2 -10 609.005 17.3996   1 
  -5   2  10 592.991 19.9439   2 
  -5   2  10 611.849 15.3577   1 
  -5   2  10 601.318 18.4316   2 
   4  -2 -10 205.575 8.79183   2 
   4  -2 -10 207.110 8.03276   1 
   4  -2 -10 212.102 14.9258   2 
  -4   2  10 217.639 10.9414   2 
  -4   2  10 207.309 9.42702   2 
  -4   2  10 219.215 6.92547   1 
   3  -2 -10 107.420 5.68324   1 
   3  -2 -10 106.843 10.4200   2 
   3  -2 -10 108.029 5.94582   2 
  -3   2  10 98.4281 5.88825   2 
  -3   2  10 101.485 5.14005   1 
   2  -2 -10 90.4249 4.62394   2 
   2  -2 -10 91.1318 4.11278   1 
   2  -2 -10 85.8194 8.04887   2 
  -2   2  10 85.5218 3.85445   1 
  -2   2  10 85.6632 5.78180   2 
  -2   2  10 86.9181 4.17763   2 
   1  -2 -10 24.0851 3.67857   2 
   1  -2 -10 23.7612 2.32758   1 
   1  -2 -10 21.7608 2.48890   2 
  -1   2  10 17.8982 2.11156   1 
  -1   2  10 20.8779 2.85243   2 
  -1   2  10 16.8923 1.97872   2 
   0  -2 -10 212.299 6.25015   1 
   0  -2 -10 218.353 6.74669   2 
   0   2  10 232.375 6.28279   2 
  -1  -2 -10 46.2496 4.02699   2 
  -1  -2 -10 43.5286 3.08862   1 
  -1  -2 -10 51.3998 3.28785   2 
  -2  -2 -10 45.4138 3.60352   1 
  -2  -2 -10 44.2769 3.23449   2 
  -2  -2 -10 43.6627 4.31245   2 
  -3  -2 -10 5.34964 2.22656   2 
  -3  -2 -10 3.50675 4.52379   2 
  -3  -2 -10 3.72247 2.37950   1 
  -4  -2 -10 23.5162 3.85014   2 
  -4  -2 -10 35.7416 6.86555   2 
  -4  -2 -10 30.6167 3.81706   1 
  -5  -2 -10 23.7972 3.77523   1 
  -5  -2 -10 25.6828 8.00124   2 
  -5  -2 -10 23.8585 4.69688   2 
  -6  -2 -10 40.0499 4.92563   1 
  -6  -2 -10 27.7658 6.46975   2 
  -6  -2 -10 28.6698 11.9074   2 
  -7  -2 -10 19.4188 9.11995   2 
  -7  -2 -10 2.81533 5.39248   1 
   7   2  10 6.12425 4.77602   2 
   5  -3 -10 191.163 9.28312   1 
   5  -3 -10 186.907 10.0178   2 
   5  -3 -10 243.000 20.3916   2 
  -5   3  10 216.416 13.6162   2 
  -5   3  10 204.088 7.27573   1 
  -5   3  10 208.522 12.1461   2 
   4  -3 -10 193.242 8.14875   1 
   4  -3 -10 191.923 16.0081   2 
   4  -3 -10 193.373 8.48273   2 
  -4   3  10 214.328 9.68198   2 
  -4   3  10 196.942 11.1936   2 
  -4   3  10 197.514 6.70427   1 
   3  -3 -10 1490.60 36.4126   2 
   3  -3 -10 1472.39 33.0134   1 
   3  -3 -10 1419.44 32.7727   2 
  -3   3  10 1418.20 33.0549   2 
  -3   3  10 1411.24 34.0713   2 
  -3   3  10 1488.48 32.0915   1 
   2  -3 -10 373.529 10.2896   1 
   2  -3 -10 394.542 10.7674   2 
   2  -3 -10 379.996 13.4672   2 
  -2   3  10 381.930 10.1157   1 
  -2   3  10 385.326 10.4687   2 
   1  -3 -10 111.450 4.91442   2 
   1  -3 -10 116.163 4.30519   1 
   1  -3 -10 117.264 6.88767   2 
  -1   3  10 107.165 4.51283   2 
  -1   3  10 106.649 4.70254   1 
  -1   3  10 107.128 5.46116   2 
   0  -3 -10 -0.1496 1.21808   1 
   0  -3 -10 0.33999 2.42994   2 
   0   3  10 -0.9831 1.54585   1 
   0   3  10 3.28538 1.88345   2 
   0   3  10 2.48142 1.58082   2 
  -1  -3 -10 42.7587 4.73311   2 
  -1  -3 -10 40.5620 2.87546   1 
  -1  -3 -10 43.8145 3.53305   2 
   1   3  10 39.9024 3.11191   2 
   1   3  10 45.2843 3.57588   2 
  -2  -3 -10 114.807 7.48778   2 
  -2  -3 -10 103.712 4.49841   2 
  -2  -3 -10 100.783 4.61866   1 
   2   3  10 96.8580 5.08135   2 
   2   3  10 103.145 4.20334   2 
  -3  -3 -10 42.9935 4.30558   1 
  -3  -3 -10 27.4151 3.10019   2 
  -3  -3 -10 39.8344 4.35457   1 
  -3  -3 -10 38.3831 5.98382   2 
   3   3  10 39.8094 3.60774   2 
   3   3  10 42.1376 5.12505   2 
  -4  -3 -10 18.7550 4.80605   2 
  -4  -3 -10 27.1924 7.33905   2 
  -4  -3 -10 40.7241 4.98449   1 
   4   3  10 33.5205 3.87186   2 
   4   3  10 38.3840 3.64733   2 
  -5  -3 -10 19.6133 9.27941   2 
  -5  -3 -10 32.2709 4.53346   1 
  -5  -3 -10 23.7558 4.74773   2 
   5   3  10 24.5989 4.52592   2 
   5   3  10 29.6415 4.35276   2 
  -6  -3 -10 16.4895 4.75963   1 
  -6  -3 -10 0.58302 11.6818   2 
  -6  -3 -10 -7.0392 5.87116   2 
   6   3  10 -6.0673 4.31632   2 
   6   3  10 5.99942 5.15851   2 
  -7  -3 -10 4.95151 9.32374   2 
  -7  -3 -10 8.59054 5.70366   1 
  -7  -3 -10 39.1254 14.3539   2 
   7   3  10 26.1176 6.36762   2 
   5  -4 -10 9.26342 12.7769   2 
   5  -4 -10 8.35868 4.44784   1 
   5  -4 -10 13.2161 4.82028   2 
  -5   4  10 6.25345 2.66199   1 
  -5   4  10 17.9763 6.52380   2 
  -5   4  10 27.3393 8.61494   2 
   4  -4 -10 -3.8310 3.19333   1 
   4  -4 -10 -1.0089 3.75797   2 
   4  -4 -10 -1.9536 9.07495   2 
  -4   4  10 9.49896 2.19475   1 
  -4   4  10 1.73626 4.48167   2 
  -4   4  10 2.31609 5.70648   2 
   3  -4 -10 3.38282 3.00428   2 
   3  -4 -10 -8.3031 7.25169   2 
   3  -4 -10 -1.0662 2.57868   1 
  -3   4  10 8.72448 4.42253   2 
  -3   4  10 5.21999 1.72290   1 
  -3   4  10 1.94011 3.31489   2 
   2  -4 -10 79.5602 5.18385   2 
   2  -4 -10 79.0308 9.16776   2 
   2  -4 -10 77.5255 4.44115   1 
  -2   4  10 80.8716 5.26971   2 
  -2   4  10 71.6650 6.42713   2 
  -2   4  10 79.0727 4.38215   1 
   1  -4 -10 454.553 12.4732   2 
   1  -4 -10 464.393 11.4963   1 
   1  -4 -10 457.521 13.8536   2 
  -1   4  10 450.287 12.6858   2 
  -1   4  10 441.907 11.8341   1 
  -1   4  10 449.795 11.9130   2 
   0  -4 -10 179.199 7.07811   2 
   0  -4 -10 159.896 7.24592   2 
   0  -4 -10 177.382 5.61118   1 
   0   4  10 174.712 6.50266   1 
   0   4  10 178.397 6.35122   2 
  -1  -4 -10 5.47382 2.65008   2 
  -1  -4 -10 6.42437 3.20626   2 
  -1  -4 -10 1.42375 1.61605   1 
   1   4  10 8.05640 2.21185   2 
   1   4  10 3.09232 1.96440   2 
  -2  -4 -10 8.41674 2.74552   2 
  -2  -4 -10 8.08974 2.02855   1 
  -2  -4 -10 7.51659 4.65002   2 
   2   4  10 7.54485 2.58829   2 
   2   4  10 8.27669 2.33267   2 
  -3  -4 -10 49.8173 6.79067   2 
  -3  -4 -10 56.3840 5.23572   2 
  -3  -4 -10 63.5387 4.92981   1 
  -3  -4 -10 61.2933 5.14571   1 
   3   4  10 59.6577 4.40988   2 
   3   4  10 56.7938 5.69464   2 
  -4  -4 -10 48.5370 5.44536   2 
  -4  -4 -10 40.7970 4.60900   1 
  -4  -4 -10 49.0112 7.51856   2 
   4   4  10 53.4724 6.37567   2 
   4   4  10 53.0402 5.64004   2 
  -5  -4 -10 -8.1146 9.00061   2 
  -5  -4 -10 -7.6677 4.64344   2 
  -5  -4 -10 -2.9259 3.63167   1 
   5   4  10 -2.9144 4.18094   2 
   5   4  10 0.05472 3.90047   2 
  -6  -4 -10 3.86894 4.57255   1 
  -6  -4 -10 7.38222 10.9496   2 
  -6  -4 -10 -7.7192 6.31706   2 
   6   4  10 4.72018 5.37811   2 
   6   4  10 -0.8739 6.15421   2 
   5  -5 -10 14.3232 15.3171   2 
   5  -5 -10 14.4159 7.33510   2 
   5  -5 -10 -3.8530 5.72468   1 
  -5   5  10 7.80462 3.21685   1 
  -5   5  10 6.04435 6.88594   2 
  -5   5  10 -2.8616 8.99274   2 
   4  -5 -10 -0.2501 4.13407   2 
   4  -5 -10 10.2151 10.6346   2 
   4  -5 -10 4.36255 4.45543   1 
  -4   5  10 11.7004 6.72434   2 
  -4   5  10 7.08813 2.71839   1 
  -4   5  10 4.48575 5.41744   2 
   3  -5 -10 62.6647 6.04165   1 
   3  -5 -10 73.1400 10.0850   2 
   3  -5 -10 74.6860 6.40089   2 
  -3   5  10 70.5175 7.05460   2 
  -3   5  10 78.9831 4.48963   1 
  -3   5  10 68.4748 6.83311   2 
   2  -5 -10 -3.3014 5.92818   2 
   2  -5 -10 4.62403 3.31524   2 
   2  -5 -10 -0.2000 2.53299   1 
  -2   5  10 -0.5425 3.72549   2 
  -2   5  10 0.88608 2.15781   1 
   1  -5 -10 -1.9493 4.42112   2 
   1  -5 -10 0.82571 2.37997   1 
   1  -5 -10 2.33993 3.25277   2 
  -1   5  10 -2.8694 3.01496   2 
  -1   5  10 -1.7265 2.75748   2 
  -1   5  10 0.68871 2.29485   1 
   0  -5 -10 4.86013 1.86132   1 
   0  -5 -10 -0.3827 3.79292   2 
   0  -5 -10 1.91029 3.19475   2 
   0   5  10 4.05461 2.74378   2 
   0   5  10 2.22859 2.54237   1 
   0   5  10 4.33799 2.85041   2 
  -1  -5 -10 157.110 8.69772   2 
  -1  -5 -10 161.367 5.59841   1 
  -1  -5 -10 171.121 7.40450   2 
   1   5  10 159.479 6.68490   2 
   1   5  10 161.085 7.20150   2 
  -2  -5 -10 -0.4728 3.09639   2 
  -2  -5 -10 -2.5384 1.81968   1 
  -2  -5 -10 -3.0353 5.17755   2 
   2   5  10 8.32043 4.87151   2 
  -3  -5 -10 84.3292 6.39058   2 
  -3  -5 -10 78.5163 5.35058   1 
  -3  -5 -10 75.0948 8.20957   2 
   3   5  10 68.8819 6.92718   2 
  -4  -5 -10 53.9245 9.88897   2 
  -4  -5 -10 49.9080 5.66412   1 
  -4  -5 -10 43.8625 5.27057   2 
  -4  -5 -10 58.7463 6.28258   1 
   4   5  10 60.9198 6.21166   2 
  -5  -5 -10 -6.2601 4.99483   2 
  -5  -5 -10 0.14810 9.33553   2 
  -5  -5 -10 0.33177 4.33745   1 
   5   5  10 5.34458 4.74788   2 
   5   5  10 -12.200 5.31284   2 
  -6  -5 -10 22.5037 13.4038   2 
  -6  -5 -10 2.12902 5.11581   1 
  -6  -5 -10 -13.604 6.51608   2 
   6   5  10 1.34268 6.72557   2 
   6   5  10 -1.8704 6.54727   2 
   4  -6 -10 30.7863 6.01356   1 
   4  -6 -10 36.6180 8.09270   2 
   4  -6 -10 29.0168 13.1169   2 
  -4   6  10 35.3558 4.10667   1 
  -4   6  10 21.2246 6.40757   2 
  -4   6  10 26.1603 8.21707   2 
   3  -6 -10 26.6757 5.13131   1 
   3  -6 -10 14.4870 10.3738   2 
   3  -6 -10 40.1510 5.74066   2 
  -3   6  10 35.6293 3.87840   1 
  -3   6  10 32.0174 5.39840   2 
  -3   6  10 37.7245 6.83125   2 
   2  -6 -10 4.24026 3.28926   1 
   2  -6 -10 -8.4468 7.25618   2 
   2  -6 -10 -1.1003 3.98649   2 
  -2   6  10 -2.6887 3.84911   2 
  -2   6  10 6.12760 2.78170   1 
  -2   6  10 -1.1055 4.55311   2 
   1  -6 -10 7.28846 5.71970   2 
   1  -6 -10 4.09284 4.15374   2 
   1  -6 -10 -0.1042 2.66977   1 
  -1   6  10 0.43481 3.68009   2 
  -1   6  10 1.66642 2.48995   1 
  -1   6  10 -0.5631 4.35518   2 
   0  -6 -10 33.0557 5.00096   2 
   0  -6 -10 39.2932 4.18731   1 
   0  -6 -10 25.6124 5.27886   2 
   0   6  10 32.7642 3.78846   1 
   0   6  10 35.0353 4.32004   2 
  -1  -6 -10 -1.0479 2.14041   1 
  -1  -6 -10 2.60339 4.08346   2 
   1   6  10 7.51630 3.38423   2 
  -2  -6 -10 9.95726 4.11812   2 
  -2  -6 -10 14.9930 2.30939   1 
  -2  -6 -10 13.2544 6.86149   2 
   2   6  10 16.3355 3.72061   2 
   2   6  10 23.3130 4.44764   2 
  -3  -6 -10 21.1404 4.15736   1 
  -3  -6 -10 27.5297 8.19261   2 
  -3  -6 -10 28.3824 4.82641   2 
   3   6  10 20.7742 4.35929   2 
   3   6  10 14.2011 5.17713   2 
  -4  -6 -10 -2.7641 3.51647   1 
  -4  -6 -10 3.67973 9.51717   2 
  -4  -6 -10 -8.2513 3.66911   1 
  -4  -6 -10 -5.2138 5.00532   2 
   4   6  10 3.17161 5.12811   2 
   4   6  10 -5.3499 5.80916   2 
  -5  -6 -10 21.3816 11.7492   2 
  -5  -6 -10 1.89498 4.68133   1 
  -5  -6 -10 5.22798 5.09585   1 
  -5  -6 -10 -1.2717 5.73161   2 
   5   6  10 0.53730 5.73109   2 
   5   6  10 -0.2571 6.64551   2 
  -6  -6 -10 40.7058 15.2807   2 
  -6  -6 -10 24.8063 7.92850   2 
  -6  -6 -10 32.5268 6.26827   1 
   6   6  10 23.2053 8.68607   2 
   6   6  10 32.8819 8.44008   2 
   3  -7 -10 -10.378 5.71762   1 
   3  -7 -10 -5.1480 12.2245   2 
   3  -7 -10 -6.5256 6.30355   2 
  -3   7  10 2.42076 7.15605   2 
  -3   7  10 2.59554 3.65579   1 
  -3   7  10 2.76598 6.10172   2 
   2  -7 -10 41.6510 6.44604   2 
   2  -7 -10 30.5241 9.88599   2 
   2  -7 -10 23.9226 4.99566   1 
  -2   7  10 51.9319 5.49038   1 
  -2   7  10 35.3312 5.70895   2 
  -2   7  10 30.0983 6.19474   2 
   1  -7 -10 12.2852 5.77953   2 
   1  -7 -10 8.71565 3.48418   1 
   1  -7 -10 11.6508 7.61205   2 
  -1   7  10 3.49749 4.51894   2 
  -1   7  10 8.77549 3.49640   1 
  -1   7  10 13.2166 5.20632   2 
   0  -7 -10 18.5784 6.06363   2 
   0  -7 -10 26.0470 6.66713   2 
   0  -7 -10 21.2103 3.52845   1 
   0   7  10 15.3474 4.98958   2 
   0   7  10 20.1089 4.80888   2 
   0   7  10 17.1490 4.06366   1 
  -1  -7 -10 37.5100 5.99030   1 
  -1  -7 -10 47.1986 6.25555   2 
   1   7  10 50.7636 6.08910   2 
   1   7  10 40.4979 5.09435   2 
  -2  -7 -10 138.289 7.30238   1 
  -2  -7 -10 159.292 14.4692   2 
  -2  -7 -10 134.505 9.53107   2 
   2   7  10 147.918 9.90542   2 
   2   7  10 129.996 8.42501   2 
  -3  -7 -10 64.0140 9.16726   2 
  -3  -7 -10 80.5021 4.97321   1 
  -3  -7 -10 80.4299 11.4546   2 
   3   7  10 79.2497 8.12474   2 
   3   7  10 79.0296 7.82255   2 
  -4  -7 -10 -1.3080 4.89849   1 
  -4  -7 -10 2.86243 3.61791   1 
  -4  -7 -10 12.4404 6.33697   2 
  -4  -7 -10 -31.746 11.3990   2 
   4   7  10 -10.291 7.36268   2 
   4   7  10 1.62350 5.59187   2 
  -5  -7 -10 49.6160 8.24836   2 
  -5  -7 -10 33.8244 5.58380   1 
  -5  -7 -10 38.0052 14.7799   2 
  -5  -7 -10 26.4023 5.81678   1 
   5   7  10 20.2110 7.21820   2 
   5   7  10 39.3372 9.82353   2 
   1  -8 -10 2.34433 4.47557   1 
   1  -8 -10 15.6304 10.0645   2 
  -1   8  10 -0.5556 4.44107   1 
  -1   8  10 6.19742 6.54148   2 
  -1   8  10 -4.3126 5.75715   2 
   0  -8 -10 15.1845 8.16116   2 
   0  -8 -10 4.00727 3.88408   1 
   0  -8 -10 13.5663 8.36994   2 
   0   8  10 6.76773 5.49309   2 
   0   8  10 19.8610 6.27514   2 
  -1  -8 -10 45.7359 5.50490   1 
  -1  -8 -10 35.2321 10.0391   2 
  -1  -8 -10 46.3517 7.73111   2 
   1   8  10 48.3101 6.93275   2 
   1   8  10 40.5394 5.98616   2 
  -2  -8 -10 0.12361 11.1841   2 
  -2  -8 -10 21.8711 6.94831   2 
  -2  -8 -10 15.9462 3.24739   1 
   2   8  10 11.4741 5.48837   2 
   2   8  10 20.4640 6.81347   2 
  -3  -8 -10 21.2316 3.40761   1 
  -3  -8 -10 20.2496 6.87716   2 
  -3  -8 -10 4.54101 11.6471   2 
  -3  -8 -10 23.8142 5.28940   1 
   3   8  10 30.0614 6.67162   2 
   3   8  10 17.1958 8.09016   2 
  -4  -8 -10 6.20831 3.56272   1 
  -4  -8 -10 11.3383 7.52720   2 
  -4  -8 -10 7.14267 15.3688   2 
  -4  -8 -10 -0.7073 5.18455   1 
   4   8  10 13.9189 7.10996   2 
   4   8  10 -5.3926 8.61010   2 
  -1   5 -11 46.7189 5.15598   1 
  -1   5 -11 34.8560 4.19535   1 
   3   4 -11 -0.1541 3.26220   1 
   3   4 -11 -2.5105 6.86238   2 
   3   4 -11 17.5472 6.78526   2 
   2   4 -11 48.8106 4.31780   1 
   1   4 -11 11.0646 2.04393   1 
   1   4 -11 11.2303 3.23790   1 
   0   4 -11 -2.9996 2.84950   1 
   0   4 -11 -2.8754 1.55446   1 
  -1   4 -11 -1.5975 3.20264   1 
  -1   4 -11 -1.8879 2.12154   1 
  -2   4 -11 115.679 12.7626   1 
  -3   4 -11 3.93861 4.65422   1 
   4   3 -11 -1.6845 6.74779   2 
   4   3 -11 21.7742 9.67980   2 
   4   3 -11 7.52899 4.18227   1 
  -4  -3  11 -4.1338 3.38642   1 
   3   3 -11 12.2363 3.03573   1 
   3   3 -11 8.95477 5.84783   2 
   3   3 -11 13.5774 7.36396   2 
   2   3 -11 17.9829 2.39437   1 
   1   3 -11 68.0696 3.59552   1 
   0   3 -11 4.33181 1.61943   1 
   0   3 -11 6.87228 2.63021   1 
  -1   3 -11 -0.5758 2.74541   1 
  -1   3 -11 6.96654 2.18622   1 
  -2   3 -11 58.3685 5.63756   1 
  -2   3 -11 52.1791 5.89872   1 
  -3   3 -11 18.3937 4.31962   1 
  -4   3 -11 72.7389 8.78924   1 
   5   2 -11 10.1727 8.07817   2 
   5   2 -11 19.2158 11.5316   2 
   5   2 -11 4.41080 4.76217   1 
  -5  -2  11 13.4654 3.63485   1 
  -5  -2  11 6.08656 5.42362   2 
  -5  -2  11 9.68324 6.03270   2 
   4   2 -11 8.70835 8.95383   2 
   4   2 -11 3.01021 5.68417   2 
   4   2 -11 3.98097 3.41576   1 
  -4  -2  11 2.71972 3.21398   1 
   3   2 -11 69.2797 7.79380   2 
   3   2 -11 59.0589 8.26886   2 
   3   2 -11 62.6712 4.69113   1 
  -3  -2  11 51.7335 5.11697   1 
   2   2 -11 59.7824 3.86189   1 
   1   2 -11 22.5198 2.25166   1 
   0   2 -11 25.6483 3.00353   1 
  -1   2 -11 196.759 6.64180   1 
  -1   2 -11 186.552 7.83190   1 
  -2   2 -11 2.26479 2.87552   1 
  -2   2 -11 -1.9400 2.82486   1 
  -3   2 -11 -1.6265 3.09831   1 
  -4   2 -11 72.7115 7.73807   1 
  -5   2 -11 7.25789 5.49409   1 
   5   1 -11 53.6707 12.7911   2 
   5   1 -11 39.7290 5.27655   1 
   5   1 -11 45.7201 7.13536   2 
  -5  -1  11 36.5318 3.93839   1 
  -5  -1  11 35.6057 6.86274   2 
  -5  -1  11 30.1584 5.78624   2 
   4   1 -11 6.31078 3.43028   1 
   4   1 -11 6.91298 4.89628   2 
   4   1 -11 9.51079 9.09425   2 
  -4  -1  11 16.3427 5.15094   2 
  -4  -1  11 16.4228 2.84353   1 
  -4  -1  11 3.83428 3.82591   2 
   3   1 -11 -0.0426 3.94000   2 
   3   1 -11 3.78956 2.36921   1 
   3   1 -11 13.6382 6.62668   2 
  -3  -1  11 4.41174 2.63203   1 
   2   1 -11 -0.8417 5.20259   2 
   2   1 -11 -1.2110 3.21298   2 
   2   1 -11 4.68353 1.81637   1 
  -2  -1  11 5.84049 2.76419   1 
   1   1 -11 15.7620 1.98816   1 
   0   1 -11 229.956 6.78486   1 
  -1   1 -11 13.4643 2.36824   1 
  -2   1 -11 55.4024 5.22218   1 
  -2   1 -11 64.4039 5.29134   1 
  -3   1 -11 2.09042 2.78651   1 
  -4   1 -11 2.52768 3.76660   1 
  -5   1 -11 66.7572 6.87771   1 
   5   0 -11 17.3124 11.2238   2 
   5   0 -11 -0.6090 5.45026   2 
   5   0 -11 5.95755 4.52748   1 
  -5   0  11 8.02180 3.02597   1 
  -5   0  11 7.16535 5.50149   2 
  -5   0  11 4.29105 6.24526   2 
   4   0 -11 28.9172 4.10323   1 
   4   0 -11 27.5946 4.99935   2 
   4   0 -11 32.6263 8.40025   2 
  -4   0  11 29.5942 5.21430   2 
  -4   0  11 35.4547 3.49403   1 
  -4   0  11 31.6814 4.15168   2 
   3   0 -11 14.8385 3.76808   2 
   3   0 -11 -2.4017 6.19810   2 
  -3   0  11 0.84056 3.61662   2 
  -3   0  11 16.5656 2.83023   2 
  -3   0  11 5.39487 3.91804   1 
   2   0 -11 117.911 4.90652   1 
   2   0 -11 129.115 12.1243   2 
   2   0 -11 116.192 5.97911   2 
  -2   0  11 121.084 5.42804   1 
   1   0 -11 -0.2920 1.33455   1 
   1   0 -11 -0.7758 1.94855   2 
   1   0 -11 -2.2484 3.65925   2 
   0   0 -11 36.6013 2.92440   1 
  -1   0 -11 12.8745 2.28901   1 
  -2   0 -11 20.9201 3.12069   1 
  -2   0 -11 20.2203 3.27795   1 
  -3   0 -11 15.6820 3.07179   1 
  -4   0 -11 2.42230 3.57042   1 
  -5   0 -11 11.6060 4.66699   2 
  -5   0 -11 1.98945 3.92018   1 
  -6   0 -11 17.6327 11.3480   2 
  -6   0 -11 16.6056 5.75788   1 
  -6   0 -11 18.5539 6.45026   2 
   5  -1 -11 13.8155 4.85001   1 
   5  -1 -11 17.1614 5.16857   2 
   5  -1 -11 4.90855 10.6204   2 
  -5   1  11 10.3963 2.79898   1 
  -5   1  11 14.9929 5.76909   2 
   4  -1 -11 18.0133 8.50165   2 
   4  -1 -11 15.1525 3.39012   1 
   4  -1 -11 21.8391 4.13614   2 
  -4   1  11 19.5183 2.75727   1 
  -4   1  11 20.7281 4.19351   2 
  -4   1  11 16.5180 5.35673   2 
   3  -1 -11 14.3785 2.70472   1 
   3  -1 -11 13.1868 6.49074   2 
  -3   1  11 10.7984 4.52115   2 
  -3   1  11 19.4667 2.60987   1 
  -3   1  11 18.1389 2.79670   2 
   2  -1 -11 2.13848 1.51223   1 
   2  -1 -11 3.10444 4.52328   2 
   2  -1 -11 -2.2101 2.49538   2 
  -2   1  11 3.37945 3.02040   2 
  -2   1  11 -2.2060 1.86020   2 
  -2   1  11 1.57603 1.93787   1 
   1  -1 -11 0.92249 1.98126   2 
   1  -1 -11 0.97922 1.45348   1 
   1  -1 -11 1.97613 3.55046   2 
  -1   1  11 3.60036 2.27035   1 
   0  -1 -11 29.5597 2.54250   1 
   0  -1 -11 35.4404 4.23901   2 
  -1  -1 -11 -0.6143 1.62908   1 
  -2  -1 -11 67.7857 4.48666   1 
  -3  -1 -11 40.8386 4.73750   1 
  -4  -1 -11 55.6402 5.54205   1 
  -5  -1 -11 13.5956 3.83414   1 
  -5  -1 -11 15.7771 4.63468   2 
  -5  -1 -11 12.7377 9.12782   2 
  -6  -1 -11 11.9796 6.24523   2 
  -6  -1 -11 2.08873 4.57877   1 
  -6  -1 -11 -21.441 10.2315   2 
   5  -2 -11 42.8956 12.7352   2 
   5  -2 -11 60.3534 5.96359   1 
   5  -2 -11 71.5227 8.57922   2 
  -5   2  11 67.9949 7.12542   2 
  -5   2  11 57.7693 8.58102   2 
  -5   2  11 71.5957 5.09724   1 
   4  -2 -11 52.5339 9.83920   2 
   4  -2 -11 66.4567 7.05496   2 
   4  -2 -11 55.2674 5.57752   1 
  -4   2  11 80.0655 7.03161   2 
  -4   2  11 64.4724 4.14452   1 
   3  -2 -11 88.4359 5.85620   2 
   3  -2 -11 83.4244 5.01173   1 
  -3   2  11 91.0006 5.35232   2 
  -3   2  11 73.6313 7.20575   2 
  -3   2  11 90.4944 4.48545   1 
   2  -2 -11 93.3080 5.83345   1 
   2  -2 -11 80.0304 8.76646   2 
  -2   2  11 105.065 4.47329   2 
  -2   2  11 91.8723 6.42799   2 
  -2   2  11 91.8264 5.18885   1 
   1  -2 -11 -0.1940 1.99998   2 
   1  -2 -11 0.93083 1.32071   1 
   1  -2 -11 7.87695 3.49294   2 
  -1   2  11 -0.2519 1.58602   2 
  -1   2  11 0.04072 1.63568   1 
  -1   2  11 2.35427 2.61783   2 
   0  -2 -11 1.45772 1.38513   1 
   0  -2 -11 1.19804 2.28968   2 
   0  -2 -11 1.45883 2.54844   2 
  -1  -2 -11 4.47179 2.71166   2 
  -1  -2 -11 3.70332 1.91357   2 
  -1  -2 -11 4.33690 1.70428   1 
  -2  -2 -11 127.628 5.67242   1 
  -2  -2 -11 143.332 5.01468   2 
  -2  -2 -11 144.062 7.75891   2 
  -3  -2 -11 125.464 6.85837   1 
  -3  -2 -11 138.737 9.74149   2 
  -3  -2 -11 134.349 6.47467   1 
  -3  -2 -11 123.369 6.38386   2 
  -4  -2 -11 0.66441 6.46764   2 
  -4  -2 -11 -2.4990 3.09015   2 
  -4  -2 -11 1.34598 2.75182   1 
  -5  -2 -11 -4.4894 4.01306   2 
  -5  -2 -11 -4.5650 8.45835   2 
  -5  -2 -11 3.15392 3.68646   1 
  -6  -2 -11 -7.2331 5.62785   2 
  -6  -2 -11 -12.386 11.4811   2 
  -6  -2 -11 13.0661 4.40993   1 
   5  -3 -11 9.76676 4.68400   1 
   5  -3 -11 12.2676 5.15203   2 
   5  -3 -11 27.7916 12.7128   2 
  -5   3  11 14.5858 8.08412   2 
  -5   3  11 22.3129 3.14087   1 
  -5   3  11 32.2981 6.49969   2 
   4  -3 -11 24.8587 9.95428   2 
   4  -3 -11 31.9811 4.62045   2 
   4  -3 -11 24.1343 3.99700   1 
  -4   3  11 31.9625 3.76524   1 
  -4   3  11 35.1216 4.97567   2 
  -4   3  11 35.2386 6.72212   2 
   3  -3 -11 250.385 8.50974   1 
   3  -3 -11 221.811 14.9896   2 
   3  -3 -11 247.651 8.87122   2 
  -3   3  11 249.671 7.69930   1 
  -3   3  11 249.214 8.83804   2 
   2  -3 -11 448.599 11.8856   1 
   2  -3 -11 454.264 15.4206   2 
   2  -3 -11 444.589 12.1631   2 
  -2   3  11 435.100 13.0524   2 
  -2   3  11 441.333 11.8213   1 
  -2   3  11 457.785 11.8617   2 
   1  -3 -11 902.168 20.7537   2 
   1  -3 -11 892.606 20.2430   1 
   1  -3 -11 896.801 22.0370   2 
  -1   3  11 883.049 20.9011   1 
  -1   3  11 815.995 21.7145   2 
  -1   3  11 893.208 21.0664   2 
   0  -3 -11 138.657 6.35722   2 
   0  -3 -11 125.838 6.06278   2 
   0  -3 -11 128.079 4.61450   1 
   0   3  11 129.283 5.49610   2 
   0   3  11 128.942 5.20815   2 
  -1  -3 -11 44.7436 3.78285   2 
  -1  -3 -11 36.4791 4.18086   2 
  -1  -3 -11 38.5746 3.13703   1 
   1   3  11 42.1429 3.75631   2 
   1   3  11 39.0830 3.55371   2 
  -2  -3 -11 138.839 5.61475   1 
  -2  -3 -11 135.901 5.40580   2 
  -2  -3 -11 132.807 8.27888   2 
   2   3  11 100.422 8.15072   2 
   2   3  11 136.314 4.84017   2 
  -3  -3 -11 1.26687 4.66604   2 
  -3  -3 -11 18.2761 6.09744   2 
  -3  -3 -11 10.6851 2.72229   1 
  -3  -3 -11 15.1792 2.87045   1 
   3   3  11 14.7461 3.06321   2 
  -4  -3 -11 -13.390 6.95978   2 
  -4  -3 -11 -2.7009 3.17777   2 
  -4  -3 -11 -2.3852 2.77306   1 
   4   3  11 -1.7633 2.34901   2 
   4   3  11 -0.5781 3.19170   2 
  -5  -3 -11 18.2380 4.87912   2 
  -5  -3 -11 18.3183 9.68722   2 
  -5  -3 -11 17.5046 4.07951   1 
   5   3  11 25.9445 4.06447   2 
  -6  -3 -11 -6.0922 5.82750   2 
  -6  -3 -11 -2.0539 4.42362   1 
  -6  -3 -11 -2.0012 12.1971   2 
   6   3  11 0.41653 5.24379   2 
   6   3  11 0.55805 4.92634   2 
   5  -4 -11 1.99343 4.76535   1 
   5  -4 -11 2.71560 13.7863   2 
   5  -4 -11 18.4641 5.39985   2 
  -5   4  11 15.8822 3.07838   1 
  -5   4  11 17.5588 8.74086   2 
  -5   4  11 21.8287 6.81113   2 
   4  -4 -11 122.459 7.26717   1 
   4  -4 -11 134.443 12.9767   2 
   4  -4 -11 108.989 8.17359   2 
  -4   4  11 123.913 8.74277   2 
  -4   4  11 110.837 11.6199   2 
  -4   4  11 115.586 5.31930   1 
   3  -4 -11 168.070 16.0477   2 
   3  -4 -11 173.332 7.37781   1 
   3  -4 -11 184.067 8.22832   2 
  -3   4  11 176.051 8.37954   2 
  -3   4  11 185.761 6.47195   1 
  -3   4  11 184.266 10.1866   2 
   2  -4 -11 11.6637 3.07079   2 
   2  -4 -11 16.0863 2.38604   1 
   2  -4 -11 13.1759 5.78423   2 
  -2   4  11 15.7965 3.03367   2 
  -2   4  11 17.3051 2.29574   1 
  -2   4  11 8.62527 3.85165   2 
   1  -4 -11 565.738 16.3337   2 
   1  -4 -11 563.423 14.8588   2 
   1  -4 -11 547.392 14.0606   1 
  -1   4  11 567.825 14.9211   1 
  -1   4  11 552.068 14.3844   2 
   0  -4 -11 497.599 12.3108   1 
   0  -4 -11 492.224 13.9496   2 
   0  -4 -11 493.419 13.6207   2 
   0   4  11 504.424 12.9985   2 
   0   4  11 483.794 13.2692   1 
  -1  -4 -11 1155.06 26.2365   1 
  -1  -4 -11 1180.77 26.8195   2 
  -1  -4 -11 1185.63 27.9691   2 
   1   4  11 1185.10 26.4723   2 
  -2  -4 -11 197.436 7.24049   2 
  -2  -4 -11 190.880 6.84063   1 
   2   4  11 196.056 6.54819   2 
   2   4  11 195.432 7.47175   2 
  -3  -4 -11 10.1080 2.76813   1 
  -3  -4 -11 12.4669 6.21392   2 
   3   4  11 17.9222 2.86980   2 
   3   4  11 11.6491 3.54422   2 
  -4  -4 -11 47.9115 5.05679   2 
  -4  -4 -11 65.0028 6.34292   1 
  -4  -4 -11 48.6613 10.7301   2 
  -4  -4 -11 53.5042 5.28126   1 
   4   4  11 52.9734 5.32367   2 
   4   4  11 54.4111 5.18151   2 
  -5  -4 -11 70.6105 7.83544   1 
  -5  -4 -11 40.3026 5.53074   2 
   5   4  11 58.8181 7.03985   2 
   5   4  11 48.2195 5.56424   2 
  -6  -4 -11 -4.5647 5.24043   1 
  -6  -4 -11 -0.7470 6.48697   2 
  -6  -4 -11 -6.6734 11.6249   2 
   6   4  11 0.35331 5.34369   2 
   6   4  11 -0.0470 5.50611   2 
   4  -5 -11 -0.4621 4.63564   2 
   4  -5 -11 -3.1388 4.71513   1 
   4  -5 -11 19.7528 11.5663   2 
  -4   5  11 3.49393 5.82734   2 
  -4   5  11 16.1547 3.04350   1 
  -4   5  11 7.93835 7.01852   2 
   3  -5 -11 12.8579 3.74523   1 
   3  -5 -11 17.8656 4.34282   2 
   3  -5 -11 11.5645 12.6244   2 
  -3   5  11 16.3901 5.56128   2 
  -3   5  11 22.9596 4.55445   2 
  -3   5  11 14.4118 2.80350   1 
   2  -5 -11 18.7382 3.04636   1 
   2  -5 -11 22.1508 4.35702   2 
   2  -5 -11 16.2682 7.40428   2 
  -2   5  11 21.7662 4.15236   2 
  -2   5  11 23.9804 4.61112   2 
  -2   5  11 22.8062 2.75787   1 
   1  -5 -11 16.1410 5.67263   2 
   1  -5 -11 1.18788 3.66578   2 
   1  -5 -11 8.94794 2.47612   1 
  -1   5  11 -1.2110 3.47049   2 
  -1   5  11 -0.3197 3.17013   2 
  -1   5  11 4.16388 2.74399   1 
   0  -5 -11 12.1709 2.47321   1 
   0  -5 -11 16.2254 3.77510   2 
   0  -5 -11 3.63021 4.32385   2 
   0   5  11 11.7534 3.45989   2 
   0   5  11 9.19837 3.25644   2 
   0   5  11 9.88550 3.11385   1 
  -1  -5 -11 86.5863 6.35410   1 
  -1  -5 -11 102.069 6.78468   2 
  -1  -5 -11 96.2790 8.09463   2 
   1   5  11 103.637 6.33189   2 
  -2  -5 -11 476.271 12.4614   2 
  -2  -5 -11 484.926 15.7213   2 
  -2  -5 -11 374.114 13.1551   1 
   2   5  11 480.526 13.1663   2 
   2   5  11 354.783 11.4952   2 
  -3  -5 -11 400.524 11.6139   1 
  -3  -5 -11 401.387 12.1735   2 
  -3  -5 -11 405.625 16.5350   2 
   3   5  11 391.701 11.5654   2 
   3   5  11 391.268 12.9151   2 
  -4  -5 -11 127.411 8.24357   2 
  -4  -5 -11 121.494 8.41650   1 
  -4  -5 -11 134.262 7.74051   1 
  -4  -5 -11 123.780 14.9810   2 
   4   5  11 137.578 9.30125   2 
   4   5  11 115.718 7.28845   2 
  -5  -5 -11 51.5401 11.4073   2 
  -5  -5 -11 54.2110 6.43160   2 
  -5  -5 -11 71.8225 8.22134   1 
   5   5  11 60.4420 7.11256   2 
   5   5  11 76.4744 8.11527   2 
  -6  -5 -11 43.3504 6.37132   1 
  -6  -5 -11 31.0653 7.65603   2 
  -6  -5 -11 36.1841 14.9295   2 
   6   5  11 44.2149 7.30569   2 
   6   5  11 30.1306 7.97722   2 
   3  -6 -11 10.5051 5.41160   2 
   3  -6 -11 0.63720 4.43584   1 
   3  -6 -11 -14.321 18.4729   2 
  -3   6  11 -0.2920 3.23117   1 
  -3   6  11 3.70532 5.08234   2 
  -3   6  11 -4.7165 6.40555   2 
   2  -6 -11 -1.7563 8.07625   2 
   2  -6 -11 -0.1657 4.52487   2 
   2  -6 -11 7.07759 3.61177   1 
  -2   6  11 7.21960 3.13645   1 
  -2   6  11 -1.4523 4.14842   2 
  -2   6  11 5.21330 5.12479   2 
   1  -6 -11 55.0447 5.95235   2 
   1  -6 -11 58.8514 7.72134   2 
   1  -6 -11 58.1494 5.10419   1 
  -1   6  11 44.3486 5.37273   2 
  -1   6  11 52.0013 5.26320   1 
  -1   6  11 48.5647 5.11091   2 
   0  -6 -11 41.1859 6.31773   2 
   0  -6 -11 46.9416 6.01690   2 
   0  -6 -11 62.7487 4.74665   1 
   0   6  11 46.9782 5.64200   1 
   0   6  11 47.1853 4.78603   2 
   0   6  11 39.6919 4.85166   2 
  -1  -6 -11 0.92602 5.28755   2 
  -1  -6 -11 3.65694 4.59957   2 
  -1  -6 -11 -0.7539 2.20070   1 
   1   6  11 -0.3011 3.22663   2 
   1   6  11 8.78308 4.25853   2 
  -2  -6 -11 2.70535 2.39035   1 
  -2  -6 -11 -2.6156 5.53117   2 
  -2  -6 -11 -0.8814 6.92313   2 
   2   6  11 10.1920 3.56453   2 
   2   6  11 9.33061 4.51765   2 
  -3  -6 -11 -4.0971 8.03762   2 
  -3  -6 -11 11.3537 4.81825   2 
  -3  -6 -11 1.58506 2.75811   1 
   3   6  11 0.93747 4.04526   2 
   3   6  11 -10.356 4.33163   2 
  -4  -6 -11 7.57950 4.74170   1 
  -4  -6 -11 18.4821 5.62499   2 
  -4  -6 -11 11.5524 4.07689   1 
  -4  -6 -11 -18.581 10.2593   2 
   4   6  11 6.68806 6.30969   2 
  -5  -6 -11 249.588 22.2367   2 
  -5  -6 -11 236.645 11.8552   1 
  -5  -6 -11 229.970 12.7902   2 
  -5  -6 -11 267.605 11.4604   1 
   5   6  11 251.948 14.9251   2 
   2  -7 -11 3.00477 16.6176   2 
   2  -7 -11 26.0275 6.41136   2 
   2  -7 -11 14.9616 4.67153   1 
  -2   7  11 15.6385 4.18490   1 
  -2   7  11 20.1980 6.88843   2 
  -2   7  11 7.89105 5.96911   2 
   1  -7 -11 130.421 13.7896   2 
   1  -7 -11 99.5851 10.9863   2 
   1  -7 -11 77.0854 6.74418   1 
  -1   7  11 86.5719 9.29118   2 
  -1   7  11 85.6106 9.19154   2 
  -1   7  11 87.0792 6.99800   1 
   0  -7 -11 23.6163 7.09444   2 
   0  -7 -11 13.9164 6.49649   2 
   0  -7 -11 17.7074 3.71473   1 
   0   7  11 17.7722 5.49584   2 
   0   7  11 17.1121 4.90660   2 
  -1  -7 -11 0.72211 2.72332   1 
  -1  -7 -11 -4.8512 6.20013   2 
   1   7  11 1.89248 5.26071   2 
   1   7  11 4.47630 3.97253   2 
  -2  -7 -11 29.3369 3.34810   1 
  -2  -7 -11 32.9913 6.14832   2 
  -2  -7 -11 33.9512 9.59472   2 
   2   7  11 37.1087 5.73385   2 
   2   7  11 33.6253 5.10452   2 
  -3  -7 -11 -2.0264 2.98337   1 
  -3  -7 -11 -2.0097 5.36772   2 
  -3  -7 -11 -3.1544 9.93819   2 
   3   7  11 -4.7881 5.87133   2 
   3   7  11 -2.2975 4.80923   2 
  -4  -7 -11 -5.2255 5.21227   1 
  -4  -7 -11 -1.4105 3.68895   1 
  -4  -7 -11 13.9949 6.36979   2 
  -4  -7 -11 -20.735 12.3908   2 
   4   7  11 -4.8411 5.47400   2 
   4   7  11 -3.8017 8.26030   2 
  -5  -7 -11 0.04647 7.42336   2 
  -5  -7 -11 -6.6888 14.6714   2 
  -5  -7 -11 3.32982 5.31157   1 
  -5  -7 -11 2.74921 6.09840   1 
   5   7  11 12.8278 9.39899   2 
   5   7  11 9.90881 7.70562   2 
   1  -8 -11 -2.4455 8.50022   2 
   1  -8 -11 -3.9760 4.97005   1 
   1  -8 -11 27.4825 14.7092   2 
  -1   8  11 -5.8388 5.03757   1 
  -1   8  11 6.67248 6.66587   2 
  -1   8  11 10.1156 6.75797   2 
   0  -8 -11 2.14106 12.0110   2 
   0  -8 -11 1.63315 4.17740   1 
   0  -8 -11 7.14077 8.14175   2 
   0   8  11 6.75399 5.64494   2 
   0   8  11 3.60039 6.60449   2 
  -1  -8 -11 35.3689 10.1776   2 
  -1  -8 -11 38.0642 8.19756   2 
  -1  -8 -11 40.0192 4.50881   1 
   1   8  11 34.5667 6.41020   2 
   1   8  11 35.7771 7.58134   2 
  -2  -8 -11 10.9267 3.63880   1 
  -2  -8 -11 23.0704 7.24722   2 
  -2  -8 -11 9.33239 11.8109   2 
   2   8  11 14.0065 6.00883   2 
   2   8  11 25.6556 7.33432   2 
  -3  -8 -11 -29.033 12.6919   2 
  -3  -8 -11 -4.8029 6.97576   2 
  -3  -8 -11 -6.5273 3.37806   1 
  -3  -8 -11 14.2272 5.31144   1 
   3   8  11 -8.1395 6.13332   2 
   3   8  11 1.41270 8.04017   2 
   2   4 -12 7.13077 2.91175   1 
   1   4 -12 17.1353 2.41793   1 
   1   4 -12 7.04726 3.34701   1 
   0   4 -12 122.275 4.92150   1 
   0   4 -12 123.331 7.24064   1 
  -1   4 -12 79.6193 7.03312   1 
  -1   4 -12 72.3444 4.82548   1 
  -2   4 -12 24.2409 3.91646   1 
  -2   4 -12 38.1919 5.39868   1 
   4   3 -12 5.32311 4.23044   1 
   4   3 -12 15.2996 10.7386   2 
   4   3 -12 4.15141 7.50756   2 
  -4  -3  12 -4.4314 3.83367   1 
   3   3 -12 13.4413 7.68371   2 
   3   3 -12 16.0995 6.30006   2 
   3   3 -12 16.1507 3.44188   1 
   2   3 -12 69.4355 4.53543   1 
   1   3 -12 78.7811 4.21696   1 
   0   3 -12 7.98499 3.36441   1 
   0   3 -12 2.36000 1.85804   1 
  -1   3 -12 -0.2708 2.17693   1 
  -1   3 -12 1.76283 3.22412   1 
  -2   3 -12 60.4847 6.86231   1 
  -2   3 -12 42.2291 4.15031   1 
  -3   3 -12 1.26613 4.28165   1 
   4   2 -12 22.6415 4.41245   1 
   4   2 -12 21.4659 6.73269   2 
   4   2 -12 35.7559 10.2489   2 
  -4  -2  12 29.1362 4.12825   1 
   3   2 -12 7.84352 4.59800   1 
   3   2 -12 -2.3951 7.48844   2 
   3   2 -12 -2.7975 4.80875   2 
   2   2 -12 14.2345 2.49965   1 
   2   2 -12 9.85724 6.21302   2 
   1   2 -12 15.9621 2.39195   1 
   0   2 -12 68.4850 3.75714   1 
  -1   2 -12 -0.5643 2.10303   1 
  -1   2 -12 -0.3532 2.85756   1 
  -2   2 -12 2.34992 2.83926   1 
  -2   2 -12 -4.1006 3.15293   1 
  -3   2 -12 41.2403 4.87414   1 
  -4   2 -12 99.7610 9.01189   1 
   5   1 -12 0.50579 13.3095   2 
   5   1 -12 3.30447 5.05495   1 
   5   1 -12 -7.2387 6.27813   2 
  -5  -1  12 -1.6608 3.76026   1 
  -5  -1  12 -7.9995 6.92846   2 
  -5  -1  12 3.23286 5.15889   2 
   4   1 -12 34.3939 6.19089   2 
   4   1 -12 32.2059 10.9819   2 
   4   1 -12 26.8475 4.38683   1 
  -4  -1  12 33.6453 4.29580   1 
  -4  -1  12 34.3601 4.49400   2 
   3   1 -12 25.4801 3.48071   1 
   3   1 -12 21.2455 4.64935   2 
   3   1 -12 15.3868 7.72103   2 
  -3  -1  12 24.2814 3.66191   1 
   2   1 -12 15.4012 3.82944   2 
   2   1 -12 13.6808 2.39752   1 
   2   1 -12 17.9509 5.78323   2 
   1   1 -12 30.5201 3.11467   1 
   0   1 -12 35.6776 3.12986   1 
  -1   1 -12 69.5554 4.40325   1 
  -2   1 -12 2.44418 2.56974   1 
  -2   1 -12 -1.0139 2.93017   1 
  -3   1 -12 39.8452 4.82404   1 
  -4   1 -12 16.2754 4.55839   1 
  -5   1 -12 22.7985 5.71356   1 
   5   0 -12 8.22422 12.3477   2 
   5   0 -12 3.04818 5.23629   1 
   5   0 -12 -0.6357 6.01093   2 
  -5   0  12 3.17190 5.54798   2 
  -5   0  12 5.84408 3.84676   1 
  -5   0  12 5.89792 6.85158   2 
   4   0 -12 218.763 9.03469   1 
   4   0 -12 219.721 17.3242   2 
   4   0 -12 189.963 12.0423   2 
  -4   0  12 225.558 11.6902   2 
  -4   0  12 234.437 8.81333   2 
  -4   0  12 248.274 8.40528   1 
   3   0 -12 19.7109 7.44128   2 
   3   0 -12 18.9167 4.10994   2 
   3   0 -12 28.7386 3.41058   1 
  -3   0  12 19.6402 2.77669   2 
  -3   0  12 24.3327 3.76546   1 
   2   0 -12 95.4023 9.53095   2 
   2   0 -12 96.7633 5.76352   2 
   2   0 -12 65.2879 7.36611   1 
   1   0 -12 64.6875 3.73002   1 
   0   0 -12 41.0301 3.13392   1 
  -1   0 -12 24.3997 2.78857   1 
  -2   0 -12 51.5360 4.89337   1 
  -2   0 -12 50.0275 5.40081   1 
  -3   0 -12 30.5084 4.18316   1 
  -4   0 -12 -3.8822 3.60988   1 
  -5   0 -12 -3.1438 4.34405   1 
   5  -1 -12 12.6147 12.3011   2 
   5  -1 -12 17.7491 5.57299   2 
   5  -1 -12 13.9729 5.37015   1 
  -5   1  12 12.5437 6.08324   2 
  -5   1  12 18.9866 7.17711   2 
  -5   1  12 15.3435 3.66833   1 
   4  -1 -12 4.05405 4.45400   2 
   4  -1 -12 6.89212 9.99866   2 
   4  -1 -12 -3.9429 3.25582   1 
  -4   1  12 -4.5837 5.54890   2 
  -4   1  12 -0.2325 2.67873   1 
  -4   1  12 4.44930 3.62436   2 
   3  -1 -12 4.99071 3.77165   2 
   3  -1 -12 11.4416 3.02746   1 
   3  -1 -12 12.2245 7.21640   2 
  -3   1  12 3.31266 4.49862   2 
  -3   1  12 7.24124 2.67936   2 
  -3   1  12 12.2109 2.68813   1 
   2  -1 -12 13.5705 3.01468   2 
   2  -1 -12 16.0729 5.70032   2 
   2  -1 -12 14.8096 2.34825   1 
  -2   1  12 12.0391 2.50409   1 
   1  -1 -12 9.02190 1.97422   1 
   1  -1 -12 8.73680 2.37787   2 
  -1   1  12 7.07672 2.94863   1 
   0  -1 -12 10.3591 1.87775   1 
  -1  -1 -12 -2.6307 1.76031   1 
  -2  -1 -12 232.516 8.01994   1 
  -3  -1 -12 15.2589 3.51448   1 
  -3  -1 -12 2.66460 3.11856   1 
  -4  -1 -12 9.29595 3.33136   1 
  -5  -1 -12 24.6759 5.05143   2 
  -5  -1 -12 31.6383 4.70069   1 
  -6  -1 -12 8.04339 5.15827   1 
  -6  -1 -12 -15.808 11.7509   2 
  -6  -1 -12 -1.1255 6.22080   2 
   5  -2 -12 40.0853 6.34400   2 
   5  -2 -12 31.3360 13.6200   2 
   5  -2 -12 28.1605 5.90881   1 
  -5   2  12 42.4982 5.20722   1 
  -5   2  12 47.6234 6.81992   2 
   4  -2 -12 30.1525 4.73918   2 
   4  -2 -12 19.6638 3.98495   1 
   4  -2 -12 38.6092 10.4297   2 
  -4   2  12 31.9131 3.51450   1 
  -4   2  12 31.2012 6.39392   2 
  -4   2  12 36.8608 4.53970   2 
   3  -2 -12 108.183 6.65420   2 
   3  -2 -12 121.122 13.2352   2 
   3  -2 -12 122.520 5.99171   1 
  -3   2  12 118.831 8.79604   2 
  -3   2  12 108.714 5.67825   2 
  -3   2  12 110.403 5.35243   1 
   2  -2 -12 4.37533 2.07902   1 
   2  -2 -12 12.1787 5.56381   2 
   2  -2 -12 6.92803 3.14835   2 
  -2   2  12 7.06850 2.24234   1 
  -2   2  12 0.69142 3.48044   2 
  -2   2  12 5.87803 2.06405   2 
   1  -2 -12 4.08970 2.60940   2 
   1  -2 -12 0.43929 5.15227   2 
   1  -2 -12 5.65974 1.82113   1 
  -1   2  12 3.19153 1.90476   2 
  -1   2  12 0.75459 2.31786   1 
  -1   2  12 -0.0413 3.01903   2 
   0  -2 -12 225.387 7.14575   1 
   0  -2 -12 221.977 7.49629   2 
  -1  -2 -12 41.8823 3.79926   2 
  -1  -2 -12 37.3943 4.04380   1 
  -1  -2 -12 34.9617 3.99597   2 
  -2  -2 -12 5.38880 2.16486   1 
  -3  -2 -12 66.0216 6.86377   2 
  -3  -2 -12 60.5467 4.74208   2 
  -3  -2 -12 68.7737 5.44917   1 
  -3  -2 -12 66.9736 5.82194   1 
  -4  -2 -12 8.20325 7.18547   2 
  -4  -2 -12 -7.1539 3.00695   2 
  -4  -2 -12 2.39983 3.57697   1 
  -5  -2 -12 12.8496 4.64473   2 
  -5  -2 -12 19.0863 4.67321   1 
  -5  -2 -12 18.9820 9.78825   2 
  -6  -2 -12 3.07663 5.84600   2 
  -6  -2 -12 -0.9256 13.2550   2 
  -6  -2 -12 11.3805 5.09308   1 
   5  -3 -12 24.8014 5.51175   1 
   5  -3 -12 33.3353 6.23303   2 
   5  -3 -12 13.2715 14.1548   2 
  -5   3  12 28.3580 3.77445   1 
  -5   3  12 32.3404 6.65235   2 
  -5   3  12 22.9381 9.36209   2 
   4  -3 -12 10.4787 10.5850   2 
   4  -3 -12 6.98122 3.51193   1 
   4  -3 -12 16.5382 4.53681   2 
  -4   3  12 14.3369 6.59749   2 
  -4   3  12 11.1203 2.72084   1 
  -4   3  12 7.79347 4.75034   2 
   3  -3 -12 87.3731 6.47292   2 
   3  -3 -12 97.1590 5.71022   1 
   3  -3 -12 101.436 9.96763   2 
  -3   3  12 70.6556 6.36959   2 
  -3   3  12 94.1653 4.92236   1 
   2  -3 -12 21.0850 3.42584   2 
   2  -3 -12 19.6538 2.71396   1 
   2  -3 -12 15.6412 6.11154   2 
  -2   3  12 20.8774 2.83879   2 
  -2   3  12 18.3085 4.09129   2 
  -2   3  12 14.7575 2.51675   1 
   1  -3 -12 147.552 6.88650   2 
   1  -3 -12 154.227 5.63378   1 
   1  -3 -12 140.249 10.9625   2 
  -1   3  12 156.578 5.69417   2 
  -1   3  12 150.558 6.94235   2 
  -1   3  12 145.641 6.52830   1 
   0  -3 -12 2.38228 1.71960   1 
   0  -3 -12 7.75656 3.16818   2 
   0  -3 -12 2.58841 3.27186   2 
   0   3  12 7.99867 2.71257   2 
   0   3  12 7.13189 2.27839   2 
  -1  -3 -12 21.6168 4.15457   2 
  -1  -3 -12 21.7257 2.91749   2 
  -1  -3 -12 18.9691 2.53798   1 
  -2  -3 -12 104.824 8.95737   2 
  -2  -3 -12 92.2878 5.91058   2 
  -2  -3 -12 119.139 5.30695   1 
  -3  -3 -12 18.1134 3.01457   1 
  -3  -3 -12 20.2609 2.99322   2 
  -3  -3 -12 17.9147 6.64267   2 
  -3  -3 -12 19.0743 3.37051   1 
  -4  -3 -12 4.73964 3.33833   2 
  -4  -3 -12 7.18316 3.75479   1 
  -4  -3 -12 -1.0656 8.27635   2 
  -5  -3 -12 4.31330 4.40848   2 
  -5  -3 -12 19.9033 5.02535   1 
  -5  -3 -12 4.71231 10.6224   2 
  -6  -3 -12 0.00319 13.1731   2 
  -6  -3 -12 -6.4732 5.07961   1 
  -6  -3 -12 -0.2825 6.54152   2 
   4  -4 -12 1.46816 3.86172   1 
   4  -4 -12 -10.071 10.9470   2 
   4  -4 -12 2.98366 4.58734   2 
  -4   4  12 3.11097 2.78256   1 
  -4   4  12 0.21692 4.96897   2 
  -4   4  12 6.32486 7.17863   2 
   3  -4 -12 12.0135 8.63746   2 
   3  -4 -12 10.1798 3.13575   1 
   3  -4 -12 11.1286 4.19660   2 
  -3   4  12 10.4455 5.42743   2 
  -3   4  12 17.0690 2.79054   1 
  -3   4  12 7.94513 4.17347   2 
   2  -4 -12 29.0690 6.98519   2 
   2  -4 -12 27.1406 3.89452   2 
   2  -4 -12 40.2559 3.88823   1 
  -2   4  12 32.4445 3.65440   2 
  -2   4  12 19.9167 2.74207   1 
   1  -4 -12 6.62750 3.15878   2 
  -1   4  12 -3.5727 2.52291   2 
  -1   4  12 1.41527 2.25296   1 
  -1   4  12 -1.8657 3.13151   2 
   0  -4 -12 76.7751 4.11687   1 
   0  -4 -12 82.4655 6.52949   2 
   0  -4 -12 75.2533 7.15784   2 
   0   4  12 84.5033 5.11088   2 
   0   4  12 88.5390 5.57965   2 
  -1  -4 -12 655.458 16.0246   1 
  -1  -4 -12 658.471 18.7424   2 
   1   4  12 685.322 16.7534   2 
   1   4  12 685.011 16.3851   2 
  -2  -4 -12 134.964 5.57473   1 
  -2  -4 -12 139.849 10.5465   2 
  -2  -4 -12 123.883 6.22242   2 
   2   4  12 124.889 6.58931   2 
   2   4  12 130.592 5.59914   2 
  -3  -4 -12 338.130 10.5978   1 
  -3  -4 -12 336.701 15.4373   2 
  -3  -4 -12 354.890 10.5063   2 
   3   4  12 330.753 9.71942   2 
   3   4  12 338.886 11.1900   2 
  -4  -4 -12 -2.7943 3.57456   1 
  -4  -4 -12 12.9090 3.91376   1 
  -4  -4 -12 -1.4618 8.79711   2 
  -4  -4 -12 6.38116 3.95626   2 
   4   4  12 7.52954 3.31812   2 
   4   4  12 5.66839 4.18925   2 
  -5  -4 -12 0.81498 4.84481   2 
  -5  -4 -12 -2.8623 11.2063   2 
  -5  -4 -12 11.3224 4.73825   1 
   5   4  12 1.34502 4.13860   2 
   5   4  12 -4.0172 4.92282   2 
  -6  -4 -12 0.57775 5.92011   1 
  -6  -4 -12 -1.7073 6.49706   2 
  -6  -4 -12 -7.7358 14.1918   2 
   6   4  12 9.60190 5.63935   2 
   6   4  12 -0.6960 6.32604   2 
   4  -5 -12 6.49476 4.98350   1 
   4  -5 -12 1.89960 5.52207   2 
   4  -5 -12 4.60106 13.0146   2 
  -4   5  12 1.01947 2.91105   1 
  -4   5  12 -2.7134 5.63858   2 
  -4   5  12 -6.4698 7.56697   2 
   3  -5 -12 -5.7820 3.57583   1 
   3  -5 -12 3.83820 4.98719   2 
   3  -5 -12 -1.2433 10.3039   2 
  -3   5  12 -2.1924 4.48587   2 
  -3   5  12 1.79814 5.92690   2 
  -3   5  12 1.31042 2.68123   1 
   2  -5 -12 12.2520 3.40335   1 
   2  -5 -12 21.1764 7.86799   2 
   2  -5 -12 17.8051 4.54682   2 
  -2   5  12 6.10279 2.65024   1 
  -2   5  12 14.1147 5.37407   2 
  -2   5  12 10.5507 3.71739   2 
   1  -5 -12 82.5122 7.46912   2 
   1  -5 -12 97.8117 5.17663   1 
   1  -5 -12 85.2010 8.37464   2 
  -1   5  12 93.7030 7.39742   2 
  -1   5  12 86.5208 6.75934   2 
  -1   5  12 88.9709 5.66328   1 
   0  -5 -12 40.5284 4.98295   2 
   0  -5 -12 46.5871 4.12636   1 
   0   5  12 37.4236 4.17912   2 
  -1  -5 -12 35.4848 4.88214   2 
  -1  -5 -12 38.0087 5.33861   2 
  -1  -5 -12 31.1955 3.84184   1 
   1   5  12 36.5863 4.16987   2 
   1   5  12 38.7334 3.87155   2 
  -2  -5 -12 11.2566 2.64388   1 
  -2  -5 -12 1.93478 5.88645   2 
  -2  -5 -12 9.03159 3.91449   2 
   2   5  12 10.8423 3.66113   2 
   2   5  12 18.5252 3.37826   2 
  -3  -5 -12 731.211 18.2427   1 
  -3  -5 -12 722.230 18.6672   2 
  -3  -5 -12 732.094 23.4740   2 
   3   5  12 722.455 18.0960   2 
   3   5  12 726.496 19.7496   2 
  -4  -5 -12 318.971 18.9942   2 
  -4  -5 -12 316.514 12.4841   1 
  -4  -5 -12 327.275 12.1351   2 
  -4  -5 -12 319.958 11.3001   1 
   4   5  12 325.953 10.7975   2 
   4   5  12 323.087 12.4957   2 
  -5  -5 -12 161.645 10.2728   1 
  -5  -5 -12 145.295 10.8295   2 
  -5  -5 -12 148.564 14.7949   2 
  -5  -5 -12 165.788 10.3810   1 
   5   5  12 146.244 9.28288   2 
   5   5  12 153.431 11.0488   2 
   3  -6 -12 -2.0289 4.77815   1 
   3  -6 -12 9.42789 6.10520   2 
   3  -6 -12 -9.6094 11.6428   2 
  -3   6  12 11.5927 3.69565   1 
  -3   6  12 8.63995 6.95073   2 
  -3   6  12 6.77381 5.43299   2 
   2  -6 -12 13.4722 3.88807   1 
   2  -6 -12 18.8817 5.58960   2 
   2  -6 -12 27.2654 9.49638   2 
  -2   6  12 18.7881 5.91622   2 
  -2   6  12 12.6640 4.71947   2 
  -2   6  12 9.97074 3.68321   1 
   1  -6 -12 28.8546 7.55379   2 
   1  -6 -12 22.7435 5.12411   2 
   1  -6 -12 29.1663 3.85873   1 
  -1   6  12 14.8912 4.06560   1 
  -1   6  12 14.0175 4.52606   2 
  -1   6  12 18.6129 5.11253   2 
   0  -6 -12 29.1525 6.30918   2 
   0  -6 -12 26.1017 5.70107   2 
   0  -6 -12 29.9142 3.51509   1 
   0   6  12 23.8788 4.82425   2 
   0   6  12 22.5777 4.54058   2 
  -1  -6 -12 0.88195 5.18946   2 
  -1  -6 -12 -0.4461 2.55206   1 
  -1  -6 -12 7.45711 5.71518   2 
   1   6  12 5.63691 4.11550   2 
   1   6  12 -1.3989 3.62961   2 
  -2  -6 -12 -1.4833 7.80847   2 
  -2  -6 -12 3.60798 2.50757   1 
  -2  -6 -12 1.87242 4.56031   2 
   2   6  12 -2.2685 4.38804   2 
  -3  -6 -12 7.71474 5.03327   2 
  -3  -6 -12 11.0343 9.03195   2 
  -3  -6 -12 7.68587 3.15530   1 
   3   6  12 -1.9807 4.18985   2 
   3   6  12 5.93026 5.10002   2 
  -4  -6 -12 61.4848 6.85973   2 
  -4  -6 -12 62.6661 6.94982   1 
  -4  -6 -12 48.5211 6.48851   1 
  -4  -6 -12 49.2620 12.8278   2 
   4   6  12 64.3857 7.66242   2 
   4   6  12 66.2328 7.56310   2 
  -5  -6 -12 247.579 11.8782   1 
  -5  -6 -12 248.516 12.4811   1 
  -5  -6 -12 253.098 13.5888   2 
  -5  -6 -12 299.460 24.0274   2 
   5   6  12 230.107 11.9567   2 
   5   6  12 265.880 15.6657   2 
   2  -7 -12 20.5868 11.7976   2 
   2  -7 -12 15.5667 5.25625   1 
   2  -7 -12 37.6168 7.73261   2 
  -2   7  12 25.9484 4.90237   1 
  -2   7  12 36.3279 7.70497   2 
  -2   7  12 29.8599 6.50214   2 
   1  -7 -12 51.6951 9.42244   2 
   1  -7 -12 55.9781 6.45265   1 
   1  -7 -12 36.6186 7.78385   2 
  -1   7  12 42.3612 5.45823   1 
  -1   7  12 47.0080 6.68069   2 
  -1   7  12 38.4028 6.52363   2 
   0  -7 -12 7.05042 7.31550   2 
   0  -7 -12 -0.1918 3.41910   1 
   0  -7 -12 -4.1813 6.61284   2 
   0   7  12 -3.1233 4.74560   2 
   0   7  12 -1.8842 5.25380   2 
  -1  -7 -12 17.7745 3.57565   1 
  -1  -7 -12 4.67912 6.15335   2 
   1   7  12 8.30412 4.82890   2 
   1   7  12 12.3953 5.49083   2 
  -2  -7 -12 14.0274 6.03670   2 
  -2  -7 -12 12.5032 10.1369   2 
  -2  -7 -12 3.69745 3.21213   1 
   2   7  12 0.36994 4.36177   2 
   2   7  12 13.9046 5.73662   2 
  -3  -7 -12 2.74779 3.13040   1 
  -3  -7 -12 0.99167 11.1452   2 
  -3  -7 -12 -3.5874 5.71131   2 
   3   7  12 -0.0349 5.13697   2 
   3   7  12 -10.880 6.31982   2 
  -4  -7 -12 24.9237 7.07724   2 
  -4  -7 -12 8.14114 13.7771   2 
  -4  -7 -12 30.6258 6.56065   1 
  -4  -7 -12 19.7052 4.65411   1 
   4   7  12 36.1295 6.72079   2 
   4   7  12 21.4897 9.10321   2 
   0  -8 -12 11.7028 4.47238   1 
   0  -8 -12 -7.9616 9.54538   2 
   0  -8 -12 -1.3096 9.14581   2 
   0   8  12 -1.1536 6.03269   2 
   0   8  12 8.05788 7.22763   2 
  -1  -8 -12 14.4218 4.43206   1 
  -1  -8 -12 3.66395 10.6639   2 
  -1  -8 -12 -2.3924 8.10541   2 
   1   8  12 3.81980 5.84899   2 
   1   8  12 14.5797 7.69559   2 
  -2  -8 -12 -3.1701 12.8929   2 
  -2  -8 -12 1.11367 3.86208   1 
  -2  -8 -12 5.17446 7.88026   2 
   2   8  12 18.5829 7.50207   2 
   2   8  12 4.81611 5.62846   2 
  -3  -8 -12 -0.5407 7.56093   2 
  -3  -8 -12 -5.4590 3.84316   1 
  -3  -8 -12 -12.658 14.3596   2 
   3   8  12 0.44219 6.40180   2 
   3   3 -13 16.8654 6.94244   2 
   3   3 -13 15.7204 3.78250   1 
   2   3 -13 4.48722 3.71736   1 
   1   3 -13 31.1384 3.25782   1 
   0   3 -13 -5.6099 6.16851   1 
   0   3 -13 -2.8171 3.26433   1 
  -1   3 -13 -1.5718 3.79210   1 
  -1   3 -13 -1.3164 2.39742   1 
  -2   3 -13 7.78891 3.43900   1 
  -2   3 -13 3.01181 4.52114   1 
   3   2 -13 -14.236 5.53251   2 
   3   2 -13 6.12332 3.30709   1 
   3   2 -13 4.91123 8.52137   2 
   2   2 -13 3.93520 2.46822   1 
   1   2 -13 5.98924 3.39719   1 
   0   2 -13 -1.0656 1.95634   1 
  -1   2 -13 152.868 8.12268   1 
  -1   2 -13 149.144 6.21598   1 
  -2   2 -13 45.0587 5.29249   1 
  -2   2 -13 49.4706 5.65363   1 
  -3   2 -13 18.1653 4.73337   1 
  -3   2 -13 14.9054 4.78771   1 
   4   1 -13 68.3242 7.46301   2 
   4   1 -13 93.7791 12.3547   2 
   4   1 -13 56.6292 5.68559   1 
  -4  -1  13 70.5830 7.13892   1 
   3   1 -13 1.13166 3.05296   1 
   3   1 -13 2.85914 4.72467   2 
   3   1 -13 -2.0741 8.03593   2 
  -3  -1  13 -1.9118 3.54839   1 
   2   1 -13 6.36506 2.29356   1 
   2   1 -13 2.58445 6.95600   2 
   1   1 -13 3.55417 2.14824   1 
   0   1 -13 3.70634 1.98146   1 
  -1   1 -13 43.3573 4.17395   1 
  -2   1 -13 -1.1905 3.67058   1 
  -2   1 -13 -2.4185 2.78364   1 
  -3   1 -13 66.8048 7.24588   1 
  -3   1 -13 61.1872 7.12431   1 
  -4   1 -13 11.0512 4.95398   1 
   4   0 -13 30.6075 6.23800   2 
   4   0 -13 48.5581 5.44175   1 
   4   0 -13 67.3150 11.4017   2 
  -4   0  13 56.4212 6.15607   2 
  -4   0  13 45.8460 4.96832   1 
  -4   0  13 55.8846 7.09953   2 
   3   0 -13 14.5569 3.40892   1 
   3   0 -13 9.68258 4.52337   2 
   3   0 -13 12.8054 7.62385   2 
  -3   0  13 14.4936 3.53887   1 
   2   0 -13 169.956 11.8083   2 
   2   0 -13 158.239 7.48883   2 
   2   0 -13 156.313 6.19220   1 
  -2   0  13 156.567 7.74304   1 
   1   0 -13 0.30179 1.91898   1 
   0   0 -13 25.2825 2.60474   1 
  -1   0 -13 -1.0204 2.19024   1 
  -2   0 -13 -0.8098 2.53251   1 
  -2   0 -13 5.34097 3.26823   1 
  -3   0 -13 31.0100 4.74822   1 
  -3   0 -13 26.7345 4.56955   1 
  -4   0 -13 4.21167 4.42559   1 
  -5   0 -13 -0.9274 5.59899   1 
   4  -1 -13 0.08647 4.14909   1 
   4  -1 -13 27.9694 10.9726   2 
   4  -1 -13 2.46301 4.64422   2 
  -4   1  13 3.81203 3.62079   2 
  -4   1  13 10.9669 6.15231   2 
  -4   1  13 7.90403 3.33043   1 
   3  -1 -13 145.610 8.68136   2 
   3  -1 -13 188.254 14.5387   2 
   3  -1 -13 149.461 7.18779   1 
  -3   1  13 164.854 9.55380   2 
  -3   1  13 148.565 7.29874   1 
  -3   1  13 147.721 6.34476   2 
   2  -1 -13 197.852 6.99722   1 
   2  -1 -13 179.535 11.3588   2 
   2  -1 -13 195.686 7.80363   2 
  -2   1  13 190.496 8.06810   1 
   1  -1 -13 0.64231 2.70733   2 
   1  -1 -13 0.46783 1.94451   1 
   1  -1 -13 -0.4613 4.44412   2 
   0  -1 -13 150.817 5.52830   1 
  -1  -1 -13 46.8434 4.01673   1 
  -2  -1 -13 90.4241 5.62884   1 
  -3  -1 -13 1.26024 3.09429   1 
  -3  -1 -13 6.87526 3.40362   1 
  -4  -1 -13 6.74816 3.85084   1 
  -5  -1 -13 0.90150 5.16769   1 
   4  -2 -13 8.22488 4.74104   2 
   4  -2 -13 21.8368 11.2026   2 
   4  -2 -13 10.3006 4.16439   1 
  -4   2  13 11.9485 6.41139   2 
  -4   2  13 15.6491 3.69889   1 
  -4   2  13 15.6358 4.30726   2 
   3  -2 -13 0.95532 8.06176   2 
   3  -2 -13 5.95398 3.46705   2 
   3  -2 -13 -0.2122 2.79532   1 
  -3   2  13 -1.3220 2.64284   1 
  -3   2  13 1.13026 4.57991   2 
  -3   2  13 -5.0631 2.77086   2 
   2  -2 -13 139.728 5.99988   1 
   2  -2 -13 127.994 6.94904   2 
   2  -2 -13 143.915 11.0938   2 
  -2   2  13 147.048 6.56293   1 
  -2   2  13 129.018 5.47058   2 
  -2   2  13 132.738 8.44659   2 
   1  -2 -13 2.37833 4.31722   2 
   1  -2 -13 3.44019 1.94964   1 
   1  -2 -13 2.80429 2.86826   2 
  -1   2  13 3.59820 2.79607   1 
   0  -2 -13 2.81107 2.86963   2 
   0  -2 -13 -0.2931 1.75191   1 
   0  -2 -13 4.08668 3.54735   2 
  -1  -2 -13 27.9763 4.00598   2 
  -1  -2 -13 20.0095 3.37600   2 
  -1  -2 -13 24.4796 2.66948   1 
  -2  -2 -13 51.6281 4.50864   1 
  -3  -2 -13 9.95184 3.48970   1 
  -3  -2 -13 5.09375 6.92259   2 
  -3  -2 -13 11.5449 3.25257   1 
  -4  -2 -13 10.1386 4.48547   1 
  -4  -2 -13 10.2424 8.38602   2 
  -4  -2 -13 17.7147 4.11986   1 
  -5  -2 -13 -1.9755 4.30364   2 
  -5  -2 -13 -5.3378 10.6437   2 
  -5  -2 -13 0.33691 4.66532   1 
   4  -3 -13 60.1558 6.17326   2 
   4  -3 -13 44.4413 12.5544   2 
   4  -3 -13 51.0734 5.08227   1 
  -4   3  13 50.6899 5.54042   2 
  -4   3  13 55.9948 5.29635   1 
   3  -3 -13 13.8767 8.77774   2 
   3  -3 -13 5.26933 3.91605   2 
   3  -3 -13 5.12684 3.14473   1 
  -3   3  13 11.9306 2.79928   1 
  -3   3  13 -3.9508 3.35907   2 
  -3   3  13 -2.0326 5.08867   2 
   2  -3 -13 -1.8973 6.80534   2 
   2  -3 -13 -0.8014 3.00354   2 
   2  -3 -13 6.94607 2.42429   1 
  -2   3  13 3.41442 4.27331   2 
  -2   3  13 3.90916 2.48633   1 
  -2   3  13 0.80923 2.57350   2 
   1  -3 -13 18.3069 2.58729   1 
   1  -3 -13 19.9058 5.30162   2 
   1  -3 -13 18.1003 3.74688   2 
  -1   3  13 13.9580 2.63465   2 
  -1   3  13 9.91533 2.88793   1 
  -1   3  13 16.1646 3.77365   2 
   0  -3 -13 115.346 7.10923   2 
   0  -3 -13 121.773 7.24545   2 
   0  -3 -13 110.407 4.94893   1 
   0   3  13 117.815 5.30769   2 
  -1  -3 -13 1.75393 4.21776   2 
  -1  -3 -13 -2.2414 2.79372   2 
  -1  -3 -13 1.66415 2.00077   1 
  -2  -3 -13 17.5760 5.88152   2 
  -2  -3 -13 16.0022 3.00203   2 
  -2  -3 -13 14.7032 2.90103   1 
  -3  -3 -13 -1.9627 2.81372   1 
  -3  -3 -13 -1.8310 2.93037   1 
  -3  -3 -13 7.82188 6.94567   2 
  -3  -3 -13 1.24991 2.74969   2 
  -4  -3 -13 20.5268 9.05701   2 
  -4  -3 -13 27.2672 5.03208   1 
  -4  -3 -13 35.8401 4.81544   1 
  -4  -3 -13 21.6607 3.67114   2 
  -5  -3 -13 72.3715 8.16051   1 
  -5  -3 -13 20.4983 11.4375   2 
  -5  -3 -13 40.5815 4.94458   2 
   4  -4 -13 30.8382 5.51311   1 
   4  -4 -13 42.8253 14.0721   2 
   4  -4 -13 48.3702 6.22704   2 
  -4   4  13 46.8610 5.24132   1 
  -4   4  13 32.6086 6.26814   2 
  -4   4  13 41.4794 9.19777   2 
   3  -4 -13 1.00242 4.03074   2 
   3  -4 -13 7.17635 9.82656   2 
   3  -4 -13 9.11451 3.56044   1 
  -3   4  13 11.7850 2.80705   1 
  -3   4  13 12.3580 4.23517   2 
   2  -4 -13 9.04337 7.25466   2 
   2  -4 -13 22.6643 4.24697   2 
   2  -4 -13 21.3575 3.12093   1 
  -2   4  13 22.2320 4.88537   2 
  -2   4  13 20.5548 3.40699   2 
  -2   4  13 14.4260 3.04421   1 
   1  -4 -13 220.088 7.27596   1 
   1  -4 -13 216.963 9.05904   2 
   1  -4 -13 224.686 11.6480   2 
  -1   4  13 206.221 7.77991   2 
  -1   4  13 197.943 8.22513   1 
  -1   4  13 222.103 9.10440   2 
   0  -4 -13 34.8129 7.91985   2 
   0  -4 -13 30.8913 3.60508   1 
   0  -4 -13 50.9154 5.53151   2 
   0   4  13 34.3113 3.96310   2 
   0   4  13 49.8017 4.81950   2 
  -1  -4 -13 37.4953 4.23385   2 
  -1  -4 -13 43.2192 5.96157   2 
  -1  -4 -13 35.7366 3.45741   1 
   1   4  13 45.0782 4.87123   2 
   1   4  13 47.7526 5.04747   2 
  -2  -4 -13 161.037 11.8707   2 
  -2  -4 -13 152.739 6.17071   1 
  -2  -4 -13 145.027 6.79048   2 
   2   4  13 157.289 6.34916   2 
   2   4  13 150.279 7.29719   2 
  -3  -4 -13 32.0289 8.53997   2 
  -3  -4 -13 27.6550 3.96901   2 
  -3  -4 -13 20.7952 3.64138   1 
   3   4  13 36.3029 4.36868   2 
   3   4  13 26.2155 3.22964   2 
  -4  -4 -13 28.3749 4.67270   1 
  -4  -4 -13 11.5547 10.2289   2 
  -4  -4 -13 10.8357 4.54735   1 
  -4  -4 -13 19.1380 4.50385   2 
   4   4  13 23.2266 3.75431   2 
   4   4  13 26.7126 4.62953   2 
  -5  -4 -13 49.4839 6.17693   1 
  -5  -4 -13 53.5735 6.26756   1 
  -5  -4 -13 41.9936 12.0730   2 
  -5  -4 -13 33.7924 5.82990   2 
   5   4  13 45.2709 4.89040   2 
   3  -5 -13 7.89814 5.63649   2 
   3  -5 -13 -13.944 11.0890   2 
   3  -5 -13 -5.9445 3.92895   1 
  -3   5  13 2.72169 6.56499   2 
  -3   5  13 6.35921 5.05628   2 
   2  -5 -13 122.277 6.52853   1 
   2  -5 -13 134.477 14.4198   2 
   2  -5 -13 115.659 9.12712   2 
  -2   5  13 120.211 9.62495   2 
  -2   5  13 123.522 6.61397   1 
  -2   5  13 113.971 7.63830   2 
   1  -5 -13 26.6201 5.07692   2 
   1  -5 -13 31.3446 6.96029   2 
   1  -5 -13 25.8869 3.32885   1 
  -1   5  13 27.6508 3.95837   1 
  -1   5  13 26.4913 4.27831   2 
   0  -5 -13 22.3526 5.02124   2 
   0  -5 -13 25.6460 5.54221   2
[truncated: 914,732 more chars]
